# Supplementary material for: Characterization and Valorization of ‘Sulmona Red Garlic’ Peels and Small Bulbs
Source: MDPI journal article supplement (doi:10.3390/antiox11112088), 2022-10-22
Supplement: s1 [file s1]

## Characterization and valorization of ‘Sulmona red garlic’ peels and small bulbs

Alba Lasalvia<sup>a,†</sup>, Francesco Cairone<sup>a,†</sup>, Stefania Cesa<sup>a,\*</sup>, Alessandro Maccelli<sup>a</sup>, Maria Elisa Crestoni<sup>a</sup>, Luigi Menghini<sup>b</sup>, Simone Carradori<sup>b,\*</sup>, Beatrice Marinacci<sup>b</sup>, Marialucia Gallorini<sup>b</sup>, Osama Elsallabi<sup>c,d</sup>, Mirko Pesce<sup>c</sup>, Antonia Patruno<sup>c</sup>

<sup>a</sup>Department of Drug Chemistry and Technology, “Sapienza” University of Rome, P.le Aldo Moro 5, 00185 Rome, Italy.

<sup>b</sup>Department of Pharmacy, “G. d’Annunzio” University of Chieti-Pescara, via dei Vestini 31, 66100 Chieti, Italy.

<sup>c</sup>Department of Medicine and Science of Aging, "G. d'Annunzio" University of Chieti-Pescara, via dei Vestini 31, 66100 Chieti, Italy.

<sup>d</sup>Department of Biosciences and Nutrition, Karolinska Institutet, SE-141 57 Huddinge, Sweden.

**Table S1.** Retention time, calibration curve and correlation coefficient of reference compounds.

|                         | <b>Retention time<br/>(min)</b> | <b>Calibration curve<br/>(µg/mL)</b> | <b>Correlation<br/>coefficient</b> |
|-------------------------|---------------------------------|--------------------------------------|------------------------------------|
| Gallic acid             | 4.86                            | $y = 15.51x + 37.06$                 | 0.9987                             |
| Alliin                  | 6.89                            | $y = 6.35x + 50.34$                  | 0.9987                             |
| Catechin                | 15.48                           | $y = 5.18x - 24.29$                  | 0.9961                             |
| Chlorogenic acid        | 18.01                           | $y = 12.02x - 3.95$                  | 0.9991                             |
| Caffeic acid            | 19.01                           | $y = 35.23x - 28.86$                 | 0.9989                             |
| Epicatechin             | 20.98                           | $y = 2.47x + 58.32$                  | 0.9982                             |
| <i>p</i> -Coumaric acid | 24.71                           | $y = 42.12x - 19.25$                 | 0.9987                             |
| Cyanidin-3-rutinoside   | 27.01                           | $y = 16.58x + 34.53$                 | 0.9987                             |
| Ferulic acid            | 27.38                           | $y = 20.65x + 22.96$                 | 0.9993                             |
| Sinapic acid            | 27.91                           | $y = 11.37x + 9.92$                  | 0.9987                             |
| Myricetin               | 32.40                           | $y = 21.51x - 5.93$                  | 0.9991                             |
| Quercetin               | 37.78                           | $y = 21.69x + 24.12$                 | 0.9995                             |
| Kaempferol              | 42.25                           | $y = 25.94x + 27.50$                 | 0.9988                             |

**Figure S1.** Chromatogram of standard compounds. Panel A: 1. Gallic acid; 2. Alliin; 3. Catechin; 4. Chlorogenic acid; 5. Caffeic acid; 6. Epicatechin; 7. *p*-Coumaric acid; 8. Cyanidin-3-rutinoside; 9. Ferulic acid; 10. Sinapic acid; Panel B 11. Myricetin; 12. Quercetin; 13. Kaempferol.

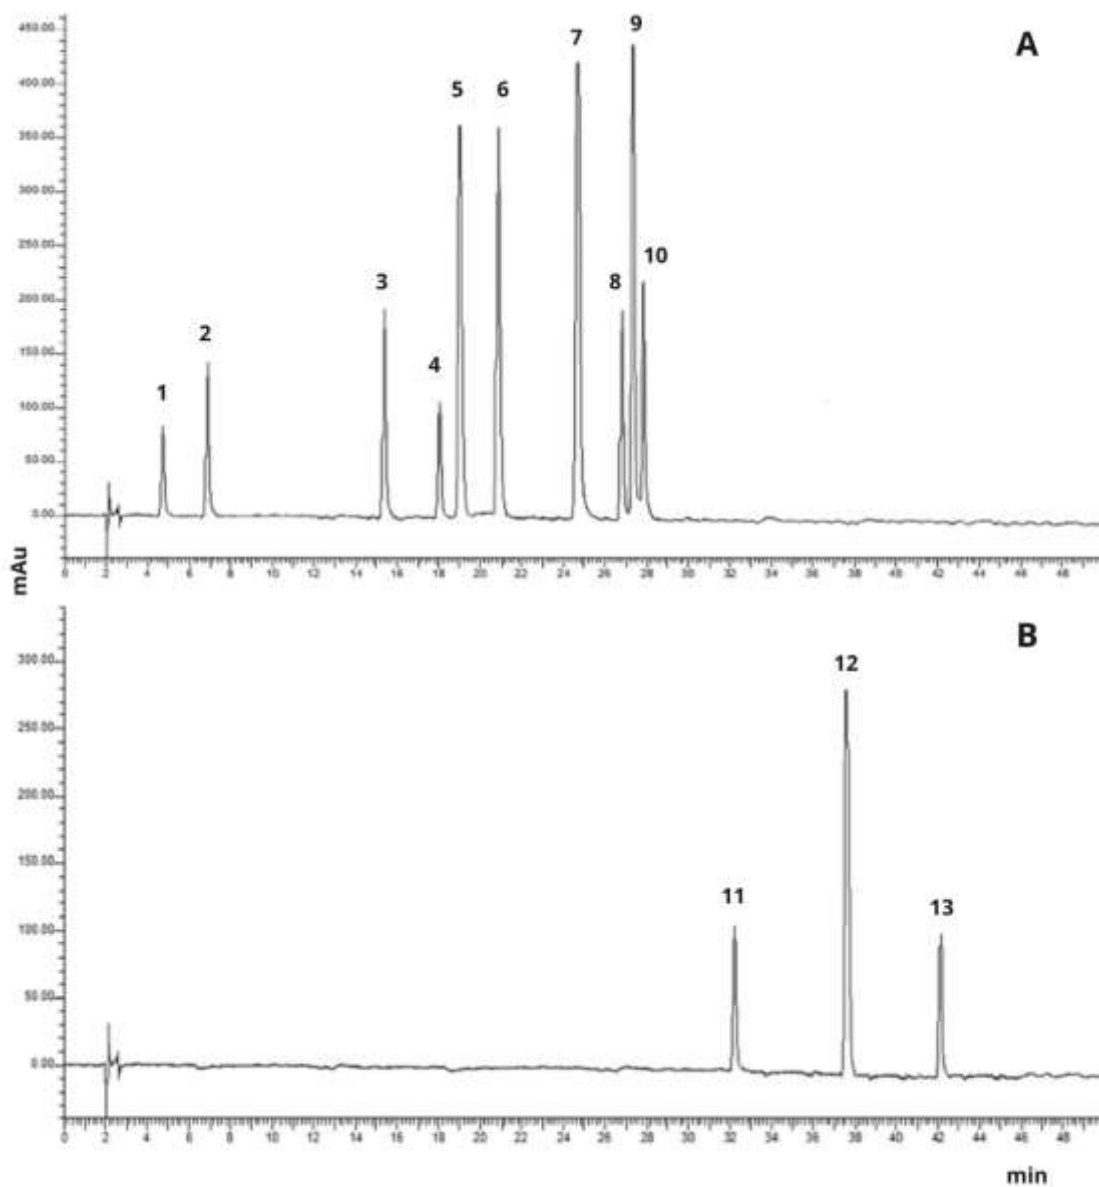

**Table S2.** Extraction yield of obtained hydroalcoholic extracts ( $p$  value < 0.002).

| Harvest date | 2020           | 2021           |
|--------------|----------------|----------------|
| Sample       | Yield %        |                |
| <b>W</b>     | $2.2 \pm 0.5$  | $3.3 \pm 0.1$  |
| <b>R</b>     | $3.9 \pm 0.5$  | $5.2 \pm 0.4$  |
| <b>B</b>     | $14.9 \pm 1.9$ | $17.9 \pm 0.7$ |

**Table S3.** CIEL\*a\*b parameters of the hydroalcoholic dried extracts. <sup>a</sup> $p$  value  $\leq 0.002$ ; <sup>b</sup> $p$  value  $\leq 0.01$ ; <sup>c</sup> $p$  value  $\leq 0.001$ ; <sup>a,b</sup> $p$  value  $\leq 0.02$ ; <sup>a,c</sup> $p$  value  $\leq 0.05$ ; <sup>a,c</sup> $p$  value  $\leq 0.001$ .

| Sample               | Harvest | L*             | a*             | b*             | C* <sub>ab</sub> | h <sub>ab</sub> |
|----------------------|---------|----------------|----------------|----------------|------------------|-----------------|
| <b>W<sup>a</sup></b> | 2020    | $73.1 \pm 0.9$ | $-0.5 \pm 0.7$ | $21.3 \pm 5.4$ | $21.4 \pm 5.4$   | $91.3 \pm 1.6$  |
|                      | 2021    | $70.8 \pm 0.3$ | $-2.2 \pm 0.1$ | $16.0 \pm 0.4$ | $16.1 \pm 0.4$   | $97.8 \pm 0.7$  |
| <b>R<sup>b</sup></b> | 2020    | $61.8 \pm 4.6$ | $17.1 \pm 2.6$ | $6.5 \pm 1.2$  | $18.8 \pm 1.6$   | $23.2 \pm 1.7$  |
|                      | 2021    | $66.1 \pm 0.1$ | $8.3 \pm 0.1$  | $5.5 \pm 0.1$  | $10.0 \pm 0.1$   | $33.6 \pm 0.1$  |
| <b>B<sup>c</sup></b> | 2020    | $72.4 \pm 4.8$ | $-1.7 \pm 0.2$ | $9.4 \pm 2.3$  | $9.5 \pm 2.4$    | $101.7 \pm 5.1$ |
|                      | 2021    | $76.1 \pm 0.1$ | $-1.7 \pm 0.1$ | $2.4 \pm 0.1$  | $2.97 \pm 0.1$   | $125.0 \pm 2.3$ |

**Figure S2.** Reflectance curves. Panel A, white tunica, 2020 and 2021; Panel B, red tunica, 2020 and 2021; Panel C; bulb, 2020 and 2021.

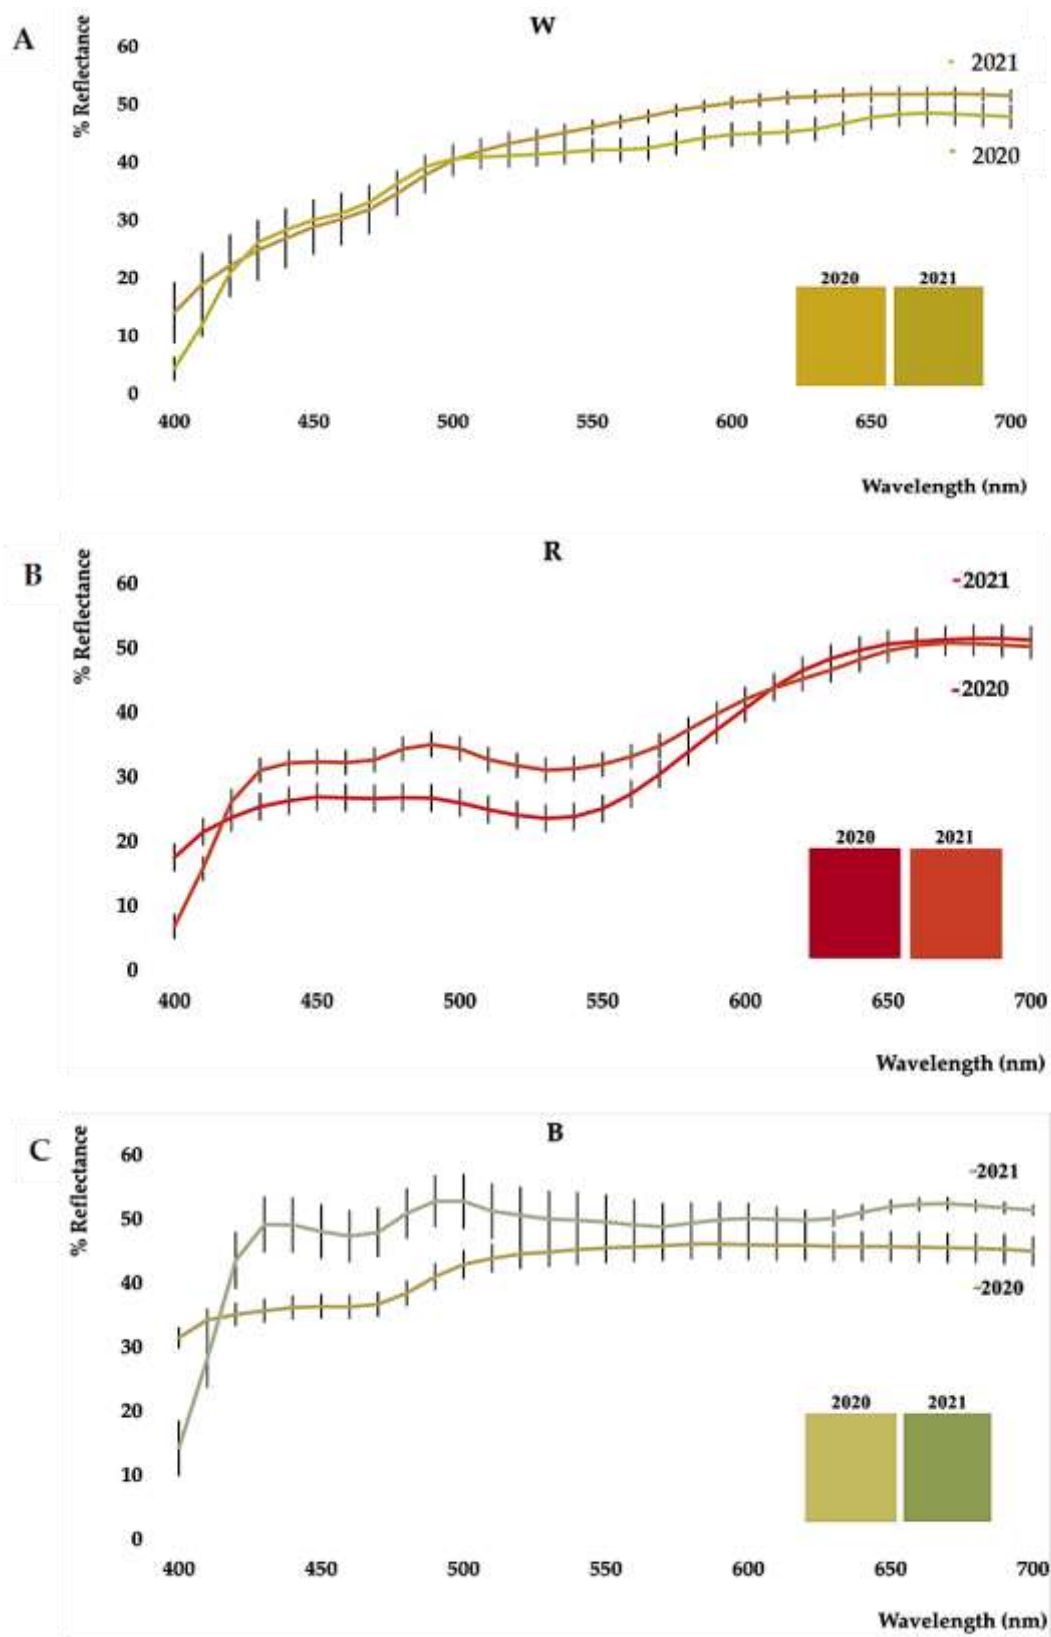

**Table S4.** DPPH analysis of the obtained extracts expressed as Inhibition % calculated as: Control Abs – Sample Abs/Control Abs x 100. *p* value  $\leq 0.05$ .

| Harvest date | July 2020           | July 2021        |
|--------------|---------------------|------------------|
| Sample       | DPPH (Inhibition %) |                  |
| W            | 24.19 $\pm$ 0.09    | 39.21 $\pm$ 2.50 |
| R            | 19.76 $\pm$ 0.16    | 16.70 $\pm$ 1.14 |
| B            | 3.25 $\pm$ 0.12     | 2.19 $\pm$ 0.04  |

**Figure S3.** Chromatograms related the different analyzed samples. Panel A (W-2020, W-2021); Panel B (R-2020; R-2021); Panel C (R-2020, R-2021 and B-2020, B-2021). Identified peaks: 1. Gallic acid; 2. Alliin; 3. Catechin; 4. Chlorogenic acid; 5. Caffeic acid; 6. Epicatechin; 7. *p*-coumaric acid; 8. Ferulic acid; 9. Sinapic acid; 10. Myricetin; 11. Quercetin; a. cinnamic acid derivative; b. kaempferol derivative; c,d,e. anthocyanins.

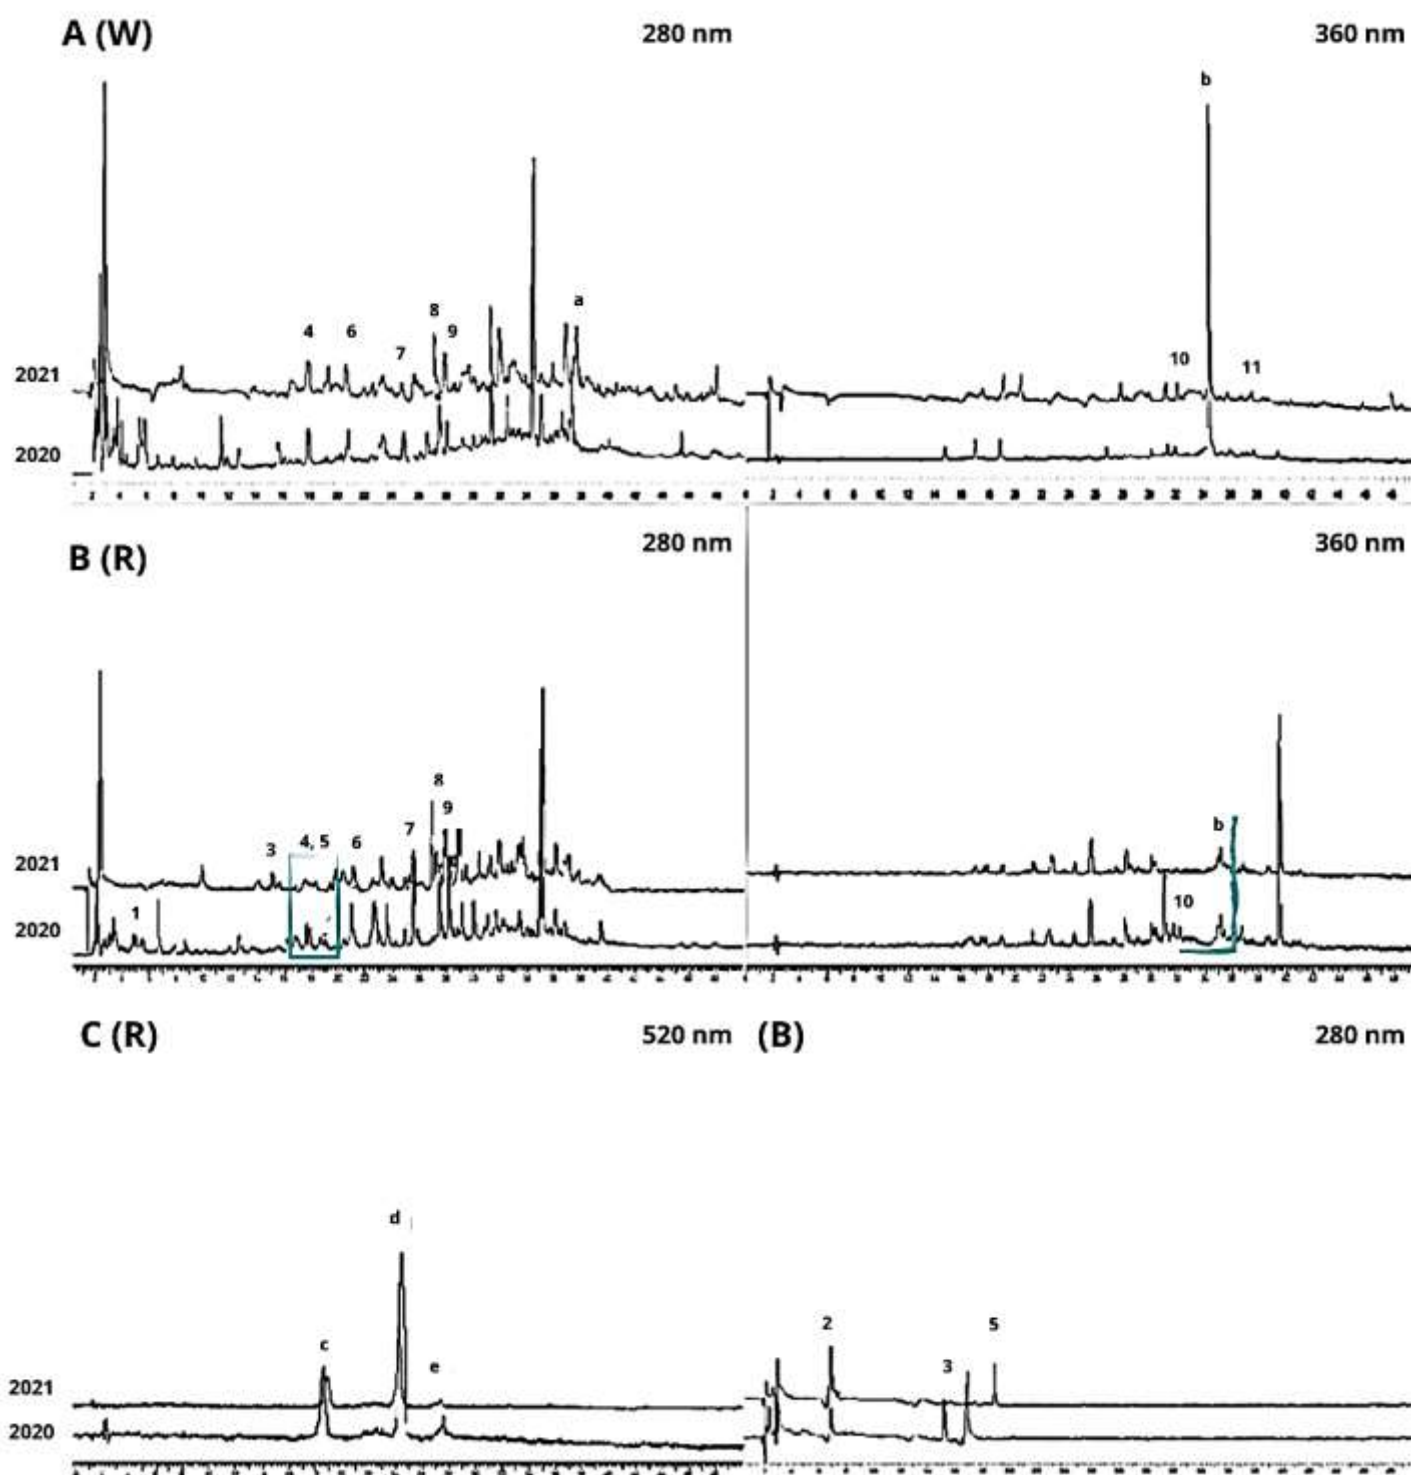

**Table S5.** HPLC-DAD quantitative analysis. Values are expressed as mg/g dry extract  $\pm$  SD; NI: not identified; ---: not searched; \*expressed as equivalents of cyanidin-3-rutinoside; \*\*expressed as equivalents of Kaempferol; \*\*\*expressed as equivalents of *p*-coumaric acid. <sup>a</sup>*p* value  $\leq$  0.002; <sup>b</sup>*p* value  $\leq$  0.001; <sup>c</sup>*p* value  $\leq$  0.87; <sup>a,b</sup>*p* value  $\leq$  0.03; <sup>a,c</sup>*p* value  $\leq$  0.002; <sup>b,c</sup>*p* value  $\leq$  0.009.

|                                    | White tunica (W) <sup>a</sup> |                 | Red tunica (R) <sup>b</sup> |                  | Bulb (B) <sup>c</sup> |                 |
|------------------------------------|-------------------------------|-----------------|-----------------------------|------------------|-----------------------|-----------------|
|                                    | 2020                          | 2021            | 2020                        | 2021             | 2020                  | 2021            |
| <b>Gallic acid</b>                 | NI                            | NI              | 0.03 $\pm$ 0.01             | NI               | NI                    | NI              |
| <b>Alliin</b>                      | NI                            | NI              | NI                          | NI               | 0.20 $\pm$ 0.03       | 0.26 $\pm$ 0.08 |
| <b>Catechin</b>                    | NI                            | NI              | NI                          | 0.84 $\pm$ 0.02  | 2.05 $\pm$ 0.06       | NI              |
| <b>Chlorogenic acid</b>            | 0.32 $\pm$ 0.02               | 0.58 $\pm$ 0.03 | NI                          | NI               | NI                    | NI              |
| <b>Caffeic acid</b>                | NI                            | NI              | 0.21 $\pm$ 0.02             | NI               | NI                    | 0.20 $\pm$ 0.06 |
| <b>Epicatechin</b>                 | 2.08 $\pm$ 0.10               | 1.56 $\pm$ 0.08 | 5.95 $\pm$ 0.07             | 2.29 $\pm$ 0.2   | NI                    | NI              |
| <b><i>p</i>-Coumaric acid</b>      | 0.10 $\pm$ 0.01               | 0.14 $\pm$ 0.01 | 0.08 $\pm$ 0.01             | NI               | NI                    | NI              |
| <b>Anthocyanins*</b>               | ---                           | ---             | 2.50 $\pm$ 0.07             | 0.67 $\pm$ 0.02  | ---                   | ---             |
| <b>Ferulic acid</b>                | 0.29 $\pm$ 0.01               | 0.43 $\pm$ 0.02 | 0.92 $\pm$ 0.01             | 0.37 $\pm$ 0.03  | NI                    | NI              |
| <b>Sinapic acid</b>                | 0.32 $\pm$ 0.02               | 0.63 $\pm$ 0.03 | 0.40 $\pm$ 0.03             | 0.67 $\pm$ 0.003 | NI                    | NI              |
| <b>Myricetin</b>                   | 0.08 $\pm$ 0.01               | 0.16 $\pm$ 0.01 | 0.10 $\pm$ 0.01             | NI               | NI                    | NI              |
| <b>Kaempferol derivative**</b>     | 1.64 $\pm$ 0.08               | 1.97 $\pm$ 0.15 | 0.80 $\pm$ 0.01             | 0.15 $\pm$ 0.01  | NI                    | NI              |
| <b>Quercetin</b>                   | 0.04 $\pm$ 0.01               | 0.08 $\pm$ 0.01 | NI                          | NI               | NI                    | NI              |
| <b>Cinnamic acid derivative***</b> | 0.55 $\pm$ 0.03               | 0.54 $\pm$ 0.03 | NI                          | NI               | NI                    | NI              |

SD: standard deviation.

**Figure S4.** Comparison between experimental ESI(+) CID assay performed by using LTQ XL ion trap and reference data obtained from Metlin database has allowed to confirm the assignments of the following peaks: Panel A) anethole  $m/z$  149; Panel B) ferulic acid  $m/z$  195.

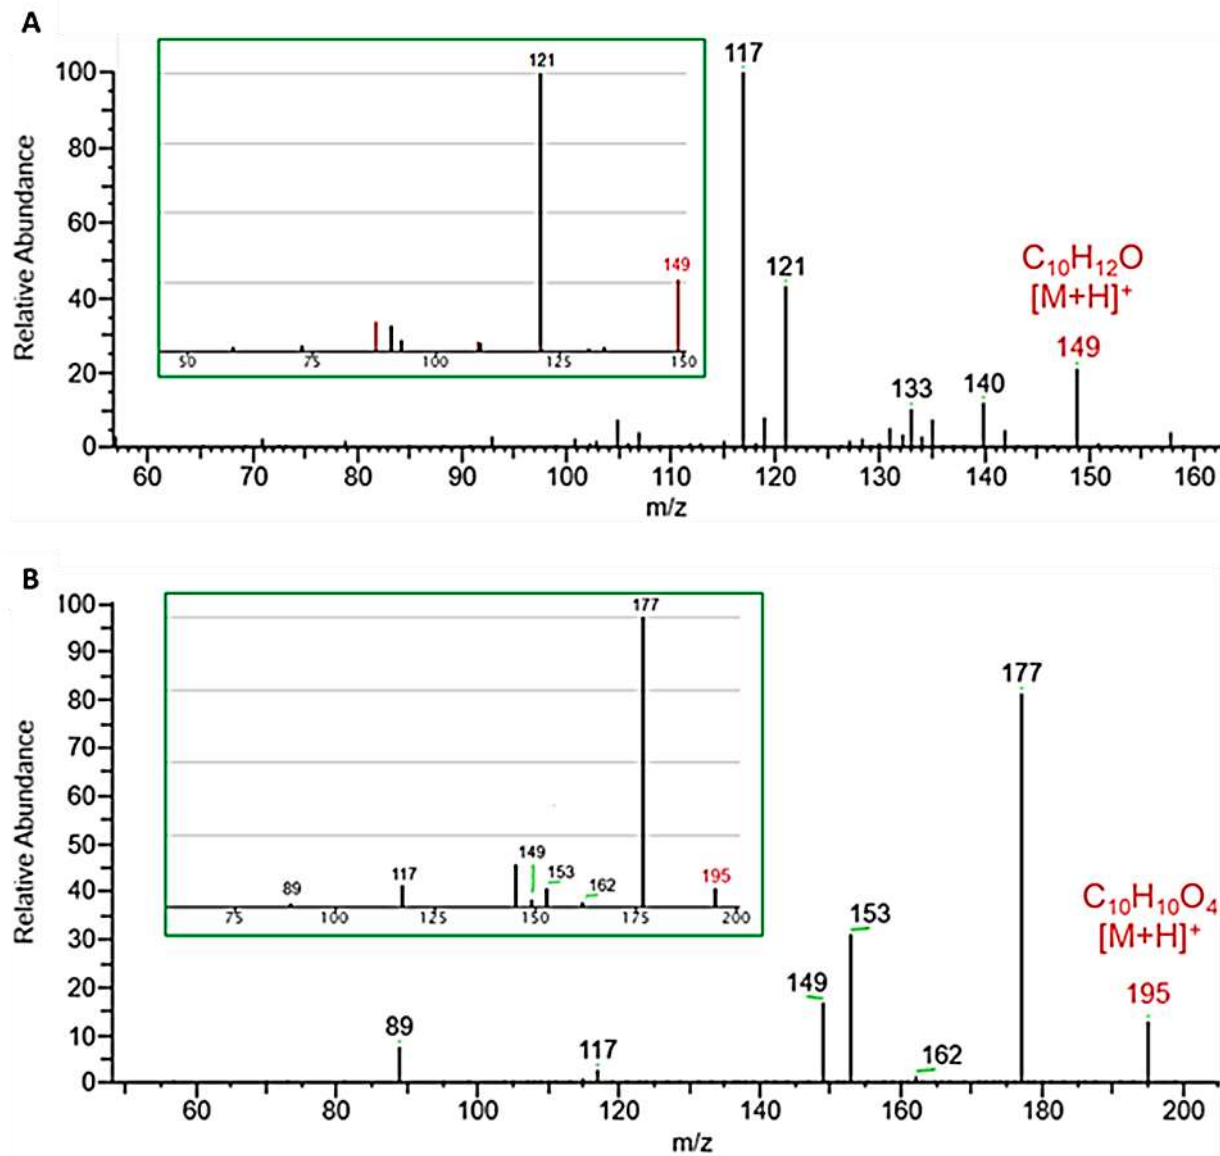



**Figure S5.** Van Krevelen diagram obtained by ESI FT-ICR MS analysis of hydroalcoholic extracts from ‘Sulmona red garlic’. The diagrams show broken lines with the following meaning: (A) lines related to (de)hydrogenation paths; (B) lines associated to oxidation or reduction reactions; (C) lines that describe hydration and condensation processes; (D) lines that correspond to (de)methylation paths. Noteworthy, peaks along A-lines include myristoleic ( $C_{14}H_{26}O_2$ )/myristic acids ( $C_{14}H_{28}O_2$ ) for  $O/C = 0.14$ , palmitoleic ( $C_{16}H_{30}O_2$ )/palmitic ( $C_{16}H_{32}O_2$ ) acids for  $O/C = 0.12$ ; carnosol ( $C_{20}H_{26}O_4$ )/carnosic acid ( $C_{20}H_{28}O_4$ ) for  $O/C = 0.2$ ; items along B-lines encompass cysteine ( $C_3H_7NO_2S$ )/cysteic acid ( $C_3H_7NO_5S$ ) for  $H/C = 2.3$ , oleic acid ( $C_{18}H_{34}O_2$ )/octadecadienoic acid ( $C_{18}H_{34}O_4$ ) for  $H/C = 1.8$ , abscisic alcohol ( $C_{15}H_{22}O_3$ )/xanthoxic acid ( $C_{15}H_{22}O_4$ ) for  $H/C = 1.4$ , ferulaldehyde ( $C_{10}H_{10}O_3$ )/ferulic acid ( $C_{10}H_{10}O_4$ ) for  $H/C = 1$ ; hits along D-lines include myristic ( $C_{14}H_{28}O_2$ )/palmitoleic ( $C_{16}H_{30}O_2$ )/linoleic ( $C_{18}H_{32}O_2$ ) acids.

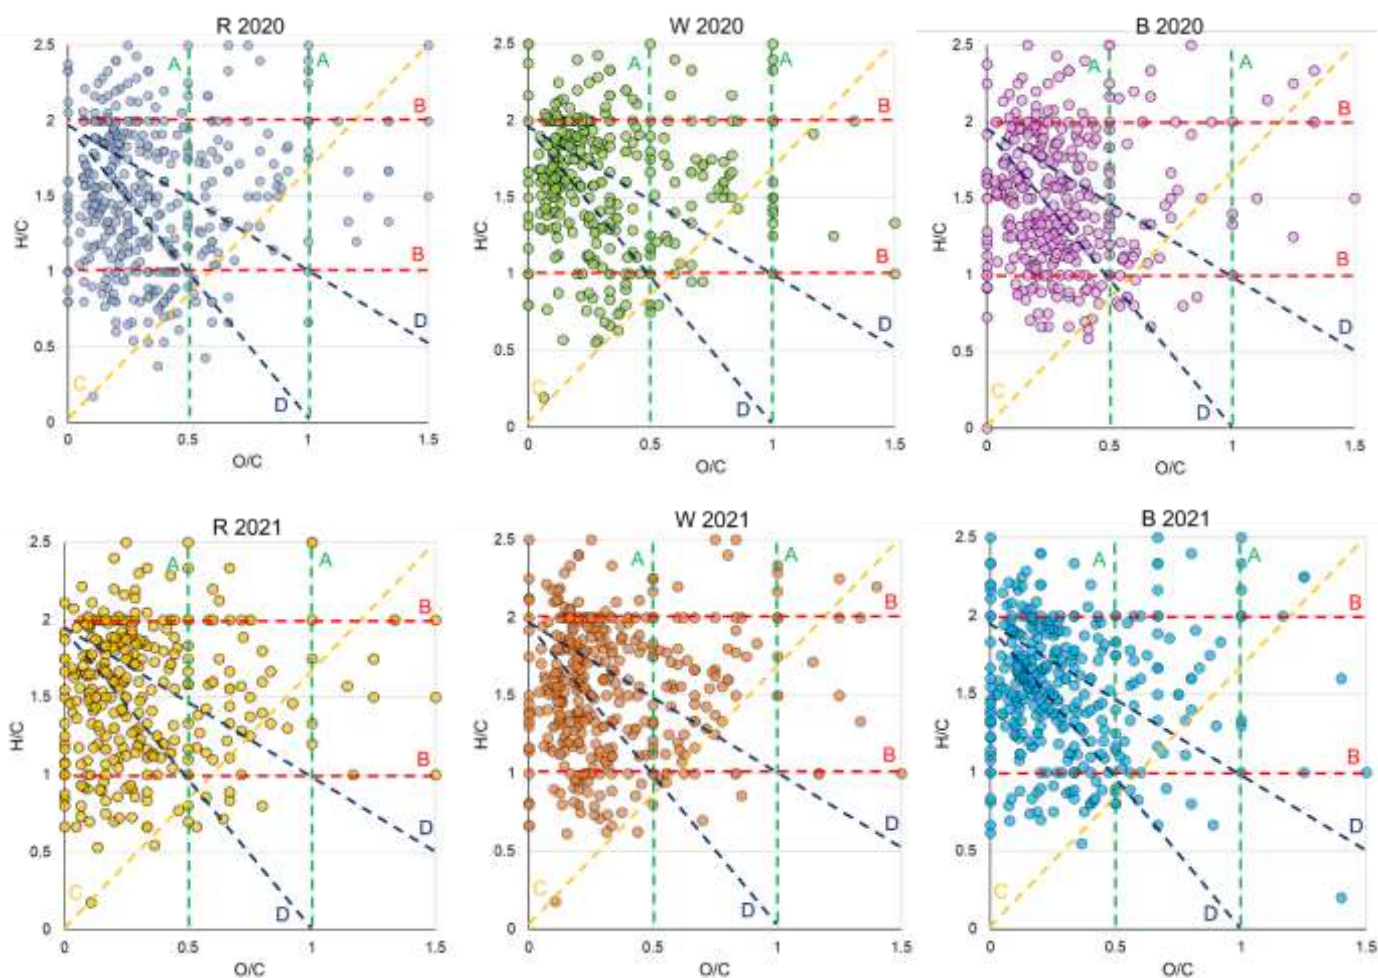

**Figure S6.** Enlargement of ESI(+) FT-ICR MS of red tunica 2021 extract. Spectrum shows protonated ( $m/z$  178.05310) and sodiated ( $m/z$  200.03512) adducts of metabolite with molecular formula  $C_6H_{11}NO_3S$ .

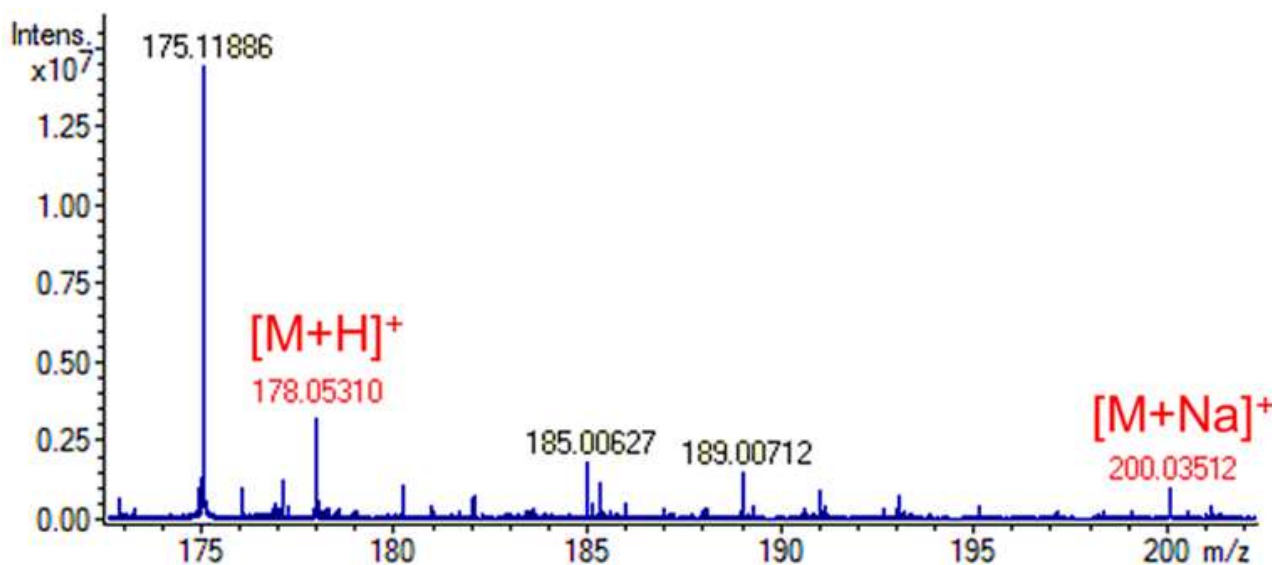

**Figure S7.** Comparison between experimental ESI(+) CID assay of peaks at  $m/z$  178.0 performed by using LTQ XL ion trap and reference data obtained from Metlin database (green panel). Red fragments belonging to *N*-formylmethionine and blue fragments fit to  $[C_3H_5NO_2+H]^+$  fragment present in both alliin and 1-PeCSO spectra.

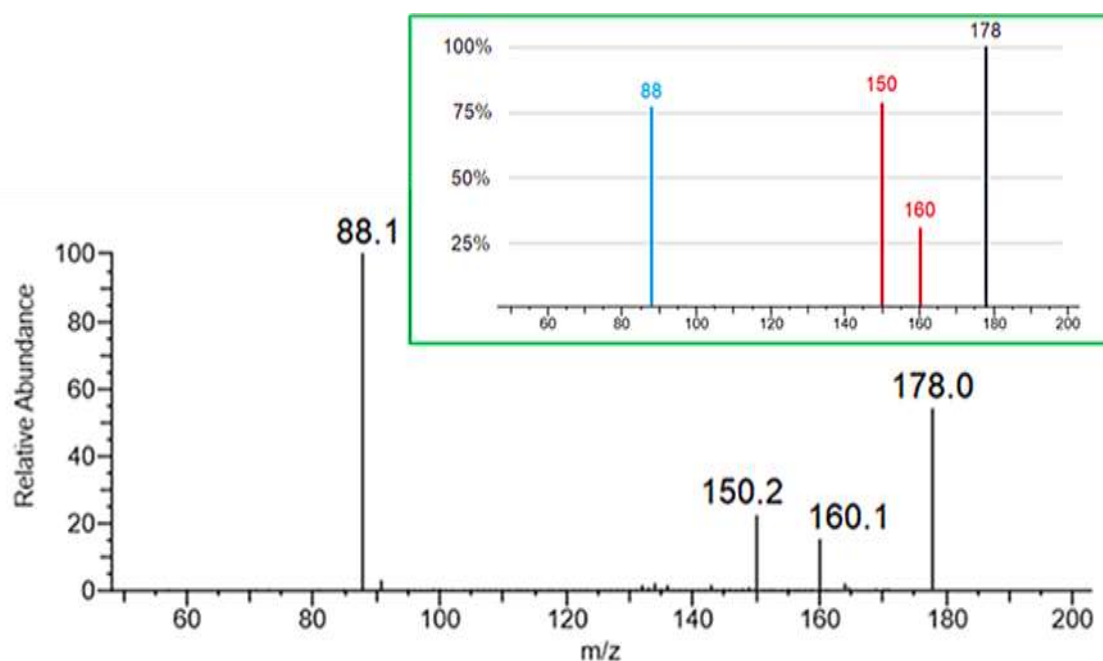

**Figure S8.** Panel A: Scores plot of the PCA analyses of the FT-ICR MS data for white and red tunica, and bulb of ‘Sulmona red garlic’ extracts. The firsts two components retain close to 70% of variation. in both cases. Dendograms, obtained on Pearson distances, are reported in panel B.

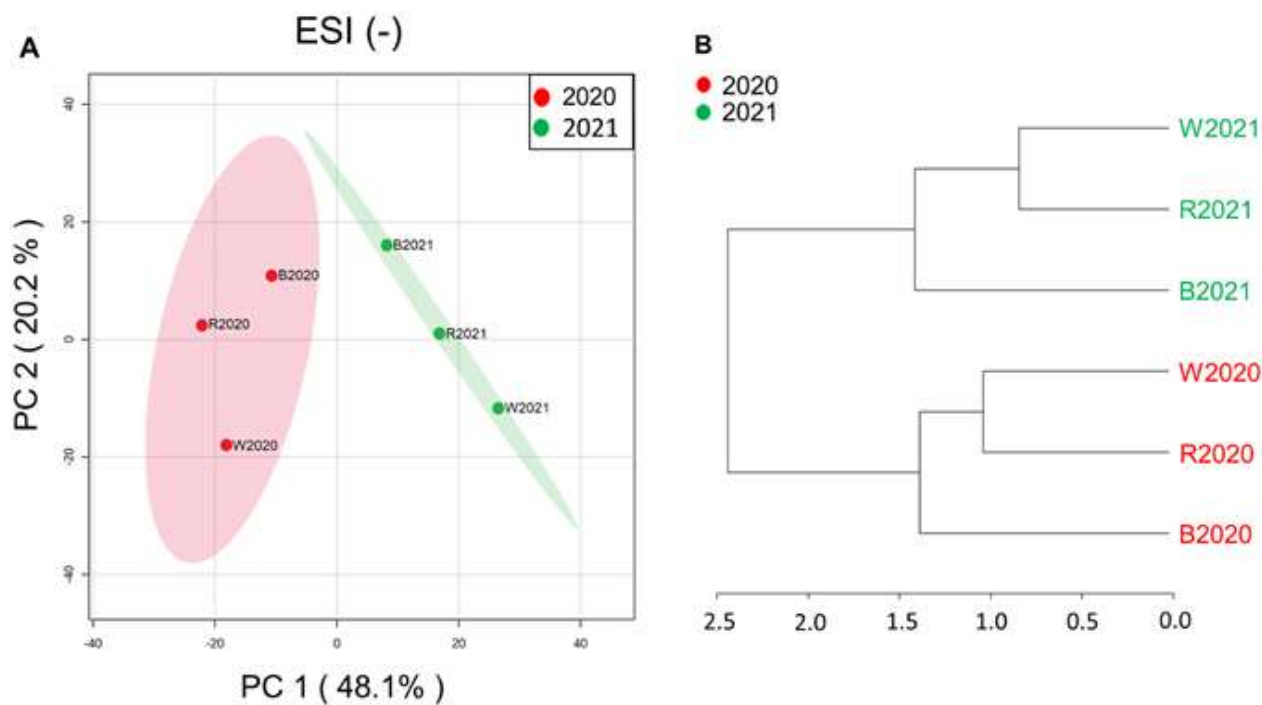

**Figure S9.** Box plots of most statistically relevant features discovered in ESI(-) data set. Box plots summarize the normalized concentrations and display that stearic and palmitic acids are variables more relevant for vintage 2020, as well as phosphatidic acid is more relevant for 2021. Positive polarity mode underlined (4-aminobutyl)guanidine ( $[C_5H_{14}N_4+Na]^+$ ), isopropylmaleate ( $[C_7H_{10}O_4+Na]^+$ ), fraxetin ( $[C_{10}H_8O_5+H]^+$ ), butenylcarnitine ( $[C_{11}H_{19}NO_4+H]^+$ ), faltarindiol ( $[C_{17}H_{24}O_2+K]^+$ ) as the most significant features.

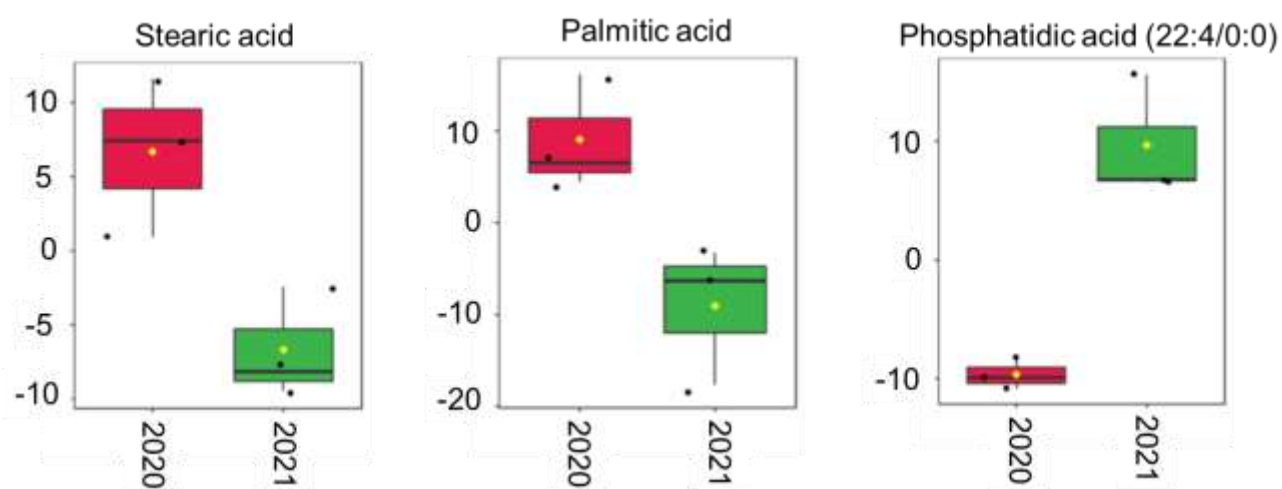

**Figure S10.** Cell metabolic activity (MTS assay) of undifferentiated (monocytes) and differentiated (macrophages), after 24 h and 48 h. THP-1 cells were assayed without differentiation or after differentiation as described in Materials and Methods. Undifferentiated and differentiated cells were untreated or treated with different doses (5, 10, 25, 50, 100 µg/mL) of garlic extracts (W: White Tunica; B: Bulb; R: Red Tunica). (Panel A) undifferentiated THP-1 cells at 24 h; (Panel B) differentiated THP-1 cells at 24 h; (Panel C) undifferentiated THP-1 cells and (Panel D) differentiated THP-1 cells at 48 h. The cells were stimulated with H<sub>2</sub>O<sub>2</sub> as cytotoxicity model at concentration of 1 mM for 8 h. Data are expressed as the mean ± SD (*n*=3) and are represented as percentages of the untreated control (100% viability); \**p*<0.05 vs untreated cells (control); #*p*<0.05 vs H<sub>2</sub>O<sub>2</sub> stimulation.

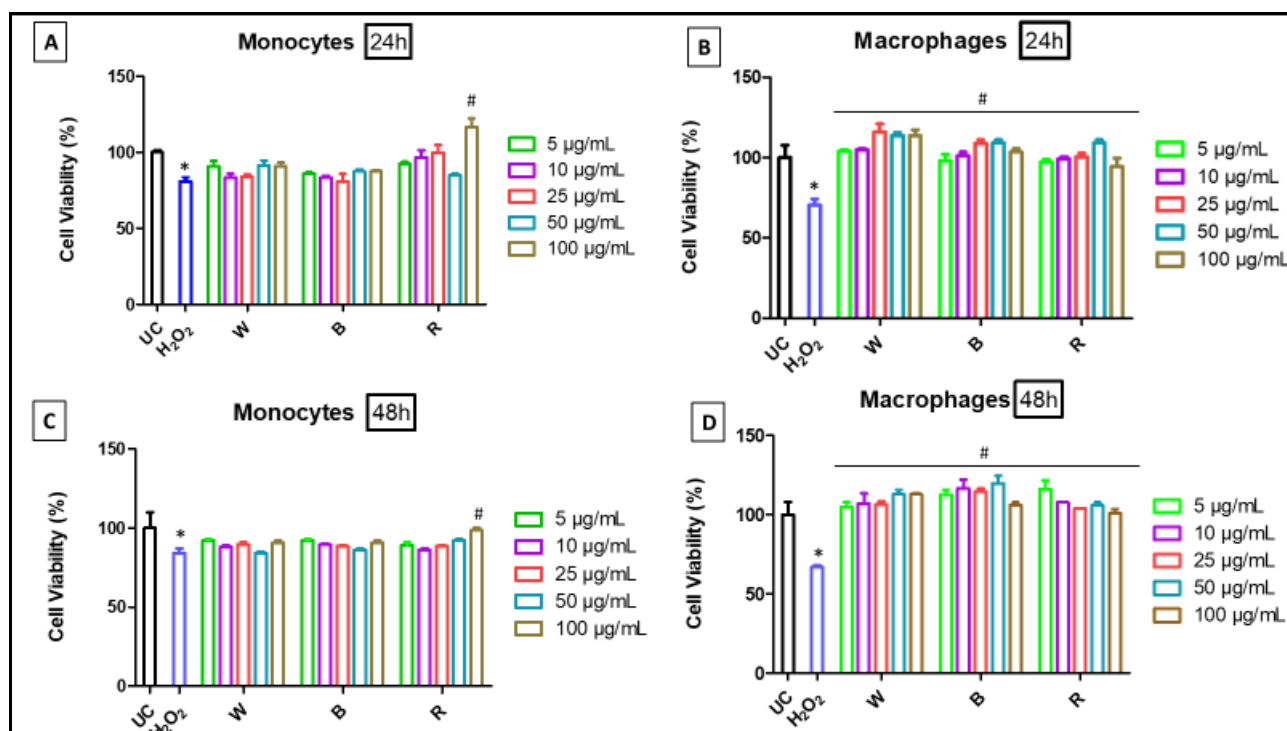

**Figure S11.** Generation of peroxynitrite by monocytes and macrophages after 24 h exposure. (Panels A, D) Histograms were obtained by flow cytometry and are generated by plotting the cell count (y-axis) and the FITC fluorescence emission (x-axis). (Panels B, C) Bar graphs show the fold increase of the mean fluorescence intensities (MFIs) related to the emissions in the FL-1/FITC channel which are proportional to the generation of peroxynitrite. Values are the ratios of the MFI generated from each sample on the unstained control (negative).  $a = p < 0.01$ ,  $b = p < 0.001$  and  $c = p < 0.0001$  between treated samples and UC;  $d = p < 0.01$ ,  $e = p < 0.001$  and  $f = p < 0.0001$  between samples and  $H_2O_2$ . UC = untreated control.

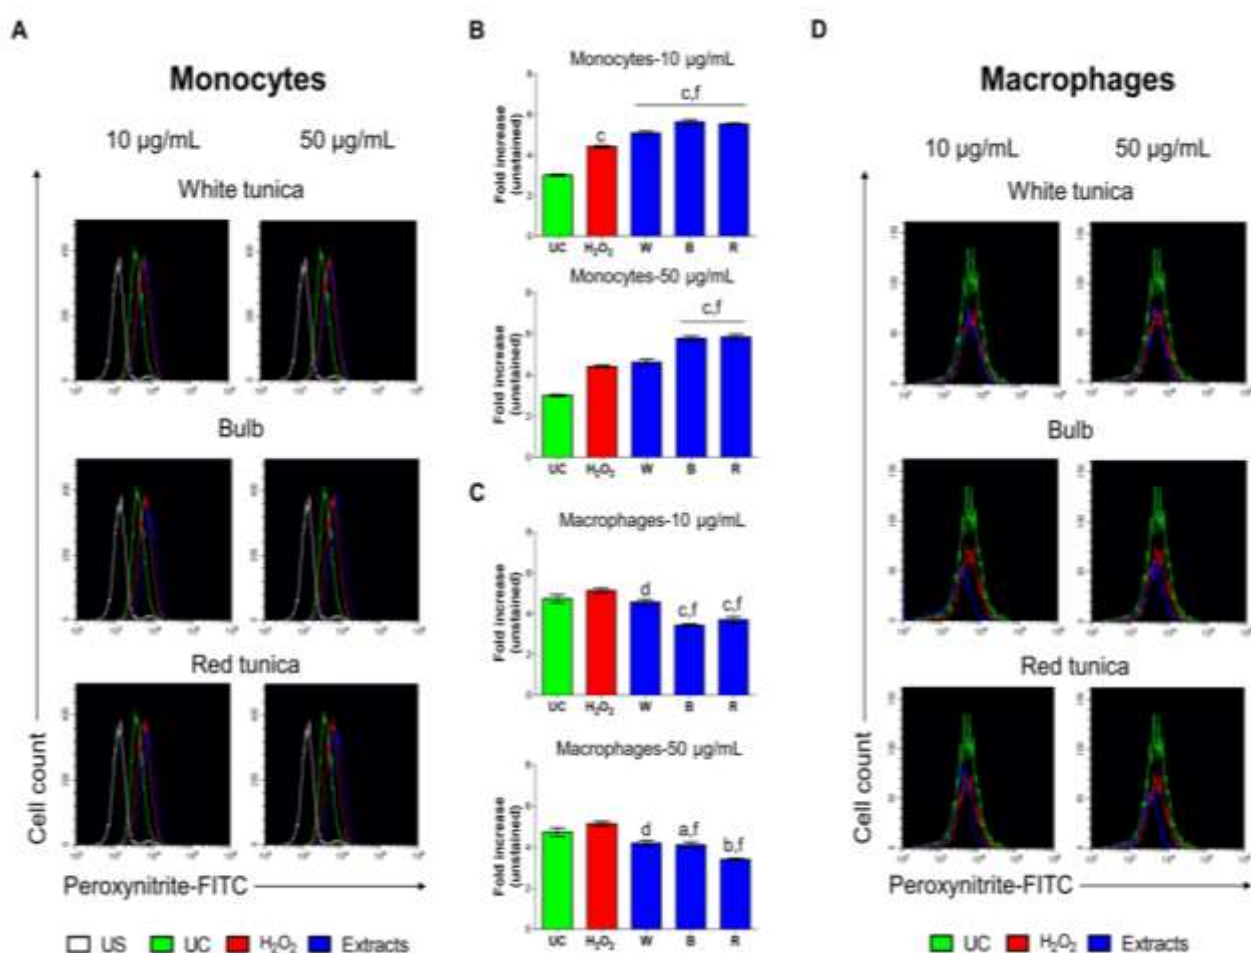

**Table S6: Untargeted metabolic profiling of *Sulmona red garlic* hydroalcoholic extracts by ESI(+) FT-ICR MS**

| # Putative Annotation <sup>a</sup> | Ion                 | Formula | m/z <sub>Theo.</sub> <sup>b</sup> | R2020 <sup>c</sup> | ppm W2020 <sup>c</sup> | ppm B2020 <sup>c</sup> | ppm R2021 <sup>c</sup> | ppm W2021 <sup>c</sup> | ppm B2021 <sup>c</sup> | ppm          |
|------------------------------------|---------------------|---------|-----------------------------------|--------------------|------------------------|------------------------|------------------------|------------------------|------------------------|--------------|
| 1 Dimethylamine                    | [M+K] <sup>+</sup>  | C2H7N   | 84.02125                          |                    |                        | 1.3E+05                | -2.9                   |                        |                        |              |
| 2 Butyrate                         | [M+H] <sup>+</sup>  | C4H8O2  | 85.02877                          |                    |                        | 9.8E+04                | -4.3                   |                        |                        |              |
| 3 Methanethiol                     | [M+K] <sup>+</sup>  | CH4S    | 86.96611                          |                    |                        |                        | 1.2E+05                | 4.8                    |                        | 1.2E+05 3.2  |
| 4 Pentan-2-one                     | [M+H] <sup>+</sup>  | C5H10O  | 87.08046                          |                    |                        |                        | 1.1E+05                | -0.2                   |                        |              |
| 5 Piperazine                       | [M+H] <sup>+</sup>  | C4H10N2 | 87.09169                          |                    | 1.1E+05                | -0.2                   |                        |                        |                        |              |
| 6 Methylbutanamine                 | [M+H] <sup>+</sup>  | C5H13N  | 88.11185                          |                    |                        |                        |                        |                        |                        | 1.1E+05 2.6  |
| 7 Pyruvic acid                     | [M+H] <sup>+</sup>  | C3H4O3  | 89.02329                          |                    | 1.2E+05                | 0.3                    | 1.1E+05                | 4.8                    |                        |              |
| 8 N,N'-Dimethylurea                | [M+H] <sup>+</sup>  | C3H8N2O | 89.07051                          |                    |                        |                        |                        |                        | 1.6E+05                | 4.8          |
| 9 Pentanol                         | [M+H] <sup>+</sup>  | C5H12O  | 89.09632                          |                    |                        |                        |                        |                        | 1.7E+05                | -2.6         |
| 10 Oxamic acid                     | [M+H] <sup>+</sup>  | C2H3NO3 | 90.01857                          | 1.1E+05            | -3.4                   |                        | 1.1E+05                | -3.0                   |                        |              |
| 11 Alanine                         | [M+H] <sup>+</sup>  | C3H7NO2 | 90.05519                          |                    | 1.2E+05                | -2.6                   |                        |                        |                        | 1.7E+05 5.0  |
| 12 N-(Aminomethyl)urea             | [M+H] <sup>+</sup>  | C2H7N3O | 90.06611                          |                    |                        |                        | 8.1E+04                | 0.9                    |                        |              |
| 13 Oxalic acid                     | [M+H] <sup>+</sup>  | C2H2O4  | 91.00290                          |                    |                        |                        |                        |                        |                        | 1.6E+05 -3.5 |
| 14 Propanethial S-oxide            | [M+H] <sup>+</sup>  | C3H6OS  | 91.02151                          |                    | 1.3E+05                | -3.3                   |                        |                        | 1.4E+05                | 2.1          |
| 15 Imidazole                       | [M+Na] <sup>+</sup> | C3H4N2  | 91.02623                          |                    |                        |                        |                        |                        |                        | 1.4E+05 4.8  |
| 16 Lactate                         | [M+H] <sup>+</sup>  | C3H6O3  | 91.03855                          |                    |                        |                        |                        |                        |                        | 1.6E+05 4.6  |
| 17 Diethyl sulfide                 | [M+H] <sup>+</sup>  | C4H10S  | 91.05774                          |                    | 1.5E+05                | -1.6                   |                        |                        |                        |              |
| 18 Butanediol                      | [M+H] <sup>+</sup>  | C4H10O2 | 91.07502                          |                    | 1.5E+05                | 3.7                    | 8.5E+04                | -2.7                   |                        |              |
| 19 3-Aminopropane-1,2-diol         | [M+H] <sup>+</sup>  | C3H9NO2 | 92.07072                          |                    |                        |                        | 1.1E+05                | -1.2                   | 1.9E+05                | -1.3         |
| 20 Propynoic acid                  | [M+Na] <sup>+</sup> | C3H2O2  | 92.99443                          |                    |                        |                        | 7.6E+05                | 2.9                    |                        | 1.1E+05 0.5  |
| 21 Thioglycolic acid               | [M+H] <sup>+</sup>  | C2H4O2S | 93.00057                          |                    | 2.3E+05                | -1.0                   |                        |                        |                        |              |
| 22 Butadiene                       | [M+K] <sup>+</sup>  | C4H6    | 93.01011                          | 9.6E+04            | 4.8                    |                        |                        |                        | 2.1E+05                | 4.8          |
| 23 alpha-Aminopropionitrile        | [M+Na] <sup>+</sup> | C3H6N2  | 93.04197                          |                    | 1.2E+05                | 3.7                    |                        |                        |                        |              |
| 24 3-Buten-1-amine                 | [M+Na] <sup>+</sup> | C4H9N   | 94.06277                          |                    |                        |                        |                        |                        | 9.6E+04                | -0.5         |
| 25 Aniline                         | [M+H] <sup>+</sup>  | C6H7N   | 94.06507                          |                    |                        |                        |                        |                        | 1.0E+05                | 0.6          |
| 26 Acrolein                        | [M+K] <sup>+</sup>  | C3H4O   | 94.98940                          |                    |                        |                        |                        |                        |                        | 1.4E+05 -0.3 |
| 27 Malondialdehyde                 | [M+Na] <sup>+</sup> | C3H4O2  | 95.00998                          |                    |                        |                        | 1.2E+05                | 3.9                    |                        |              |
| 28 Butanal                         | [M+Na] <sup>+</sup> | C4H8O   | 95.04674                          | 1.0E+05            | 3.6                    | 1.5E+05                | 3.2                    |                        |                        |              |
| 29 Phenol                          | [M+H] <sup>+</sup>  | C6H6O   | 95.04870                          |                    |                        |                        |                        |                        | 9.0E+04                | 4.6          |
| 30 Aminopyridine                   | [M+H] <sup>+</sup>  | C5H6N2  | 95.05993                          |                    |                        |                        | 2.1E+05                | 4.7                    |                        |              |
| 31 N-Methylpyridinium              | [M+H] <sup>+</sup>  | C6H8N   | 95.07304                          |                    |                        |                        |                        |                        |                        | 1.2E+05 -0.9 |
| 32 Iminoglycine                    | [M+Na] <sup>+</sup> | C2H3NO2 | 96.00542                          |                    | 1.6E+05                | 1.9                    |                        |                        | 3.4E+05                | -3.6         |
| 33 Cyclopropylamine                | [M+K] <sup>+</sup>  | C3H7N   | 96.02115                          |                    |                        |                        |                        |                        |                        | 1.3E+05 -1.5 |
| 34 Glyoxal                         | [M+K] <sup>+</sup>  | C2H2O2  | 96.96886                          |                    | 2.7E+05                | -2.3                   |                        |                        |                        |              |
| 35 Glyoxylic acid                  | [M+Na] <sup>+</sup> | C2H2O3  | 96.99042                          |                    |                        |                        |                        |                        |                        | 3.3E+05 -4.6 |
| 36 Methanesulfonic acid            | [M+H] <sup>+</sup>  | CH4SO3  | 96.99513                          |                    | 1.5E+05                | 2.7                    |                        |                        |                        |              |
| 37 Lactaldehyde                    | [M+Na] <sup>+</sup> | C3H6O2  | 97.02574                          |                    |                        |                        |                        |                        |                        | 1.8E+05 2.7  |
| 38 Propanoic acid                  | [M+Na] <sup>+</sup> | C3H6O2  | 97.02600                          | 1.5E+05            | -2.9                   |                        |                        |                        |                        |              |
| 39 Furfural                        | [M+H] <sup>+</sup>  | C5H4O2  | 97.02841                          | 1.3E+05            | 4.8                    |                        |                        |                        |                        |              |

| # Putative Annotation <sup>a</sup>   | Ion                  | Formula  | m/z <sub>Theo</sub> <sup>b</sup> | R2020 <sup>c</sup> | ppm W2020 <sup>c</sup> | ppm B2020 <sup>c</sup> | ppm R2021 <sup>c</sup> | ppm W2021 <sup>c</sup> | ppm B2021 <sup>c</sup> | ppm     |
|--------------------------------------|----------------------|----------|----------------------------------|--------------------|------------------------|------------------------|------------------------|------------------------|------------------------|---------|
| 40 2-Cyclohexen-1-one                | [M+H] <sup>+</sup>   | C6H8O    | 97.06512                         |                    | 1.6E+05                | -3.4                   |                        |                        |                        |         |
| 41 Aminoacetaldehyde                 | [M+K] <sup>+</sup>   | C2H5NO   | 98.00039                         |                    |                        |                        | 1.4E+05                | -1.2                   |                        |         |
| 42 Guanidine                         | [M+K] <sup>+</sup>   | CH5N3    | 98.01158                         |                    |                        |                        | 9.1E+04                | -0.7                   |                        |         |
| 43 Glycine                           | [M+Na] <sup>+</sup>  | C2H5NO2  | 98.02139                         |                    | 1.8E+05                | -1.4                   | 1.2E+05                | -2.9                   |                        |         |
| 44 Isopropylamine                    | [M+K] <sup>+</sup>   | C3H9N    | 98.03671                         |                    |                        |                        | 3.4E+05                | -0.5                   | 1.1E+05                | 4.6     |
| 45 Deoxycytosine                     | [M+H] <sup>+</sup>   | C4H7N3   | 98.07093                         |                    |                        |                        |                        |                        | 1.4E+05                | 3.5     |
| 46 Sulfuric acid                     | [M+H] <sup>+</sup>   | H2SO4    | 98.97540                         |                    | 1.3E+05                | -0.4                   |                        |                        |                        |         |
| 47 Thiourea                          | [M+Na] <sup>+</sup>  | CH4N2S   | 98.99878                         |                    |                        |                        |                        |                        | 1.2E+05                | -0.4    |
| 48 Glycolic acid                     | [M+Na] <sup>+</sup>  | C2H4O3   | 99.00483                         |                    |                        |                        | 8.7E+04                | 4.4                    |                        |         |
| 49 Hydroxyurea                       | [M+Na] <sup>+</sup>  | CH4N2O2  | 99.01650                         | 2.3E+05            | 0.3                    |                        |                        |                        |                        |         |
| 50 Propan-2-ol                       | [M+K] <sup>+</sup>   | C3H8O    | 99.02067                         | 8.7E+04            | 3.2                    |                        |                        |                        |                        |         |
| 51 Propyl mercaptan                  | [M+Na] <sup>+</sup>  | C3H8S    | 99.02396                         |                    | 1.2E+05                | -0.7                   |                        |                        |                        |         |
| 52 Propane-1,2-diol                  | [M+Na] <sup>+</sup>  | C3H8O2   | 99.04128                         |                    |                        |                        | 1.9E+05                | 3.7                    |                        |         |
| 53 Imidazole-4-methanol              | [M+H] <sup>+</sup>   | C4H6N2O  | 99.05536                         |                    |                        |                        |                        |                        | 1.3E+05                | -0.7    |
| 54 Guanidine                         | [M+K41] <sup>+</sup> | CH5N3    | 100.00917                        |                    |                        |                        | 1.2E+05                | 4.5                    |                        |         |
| 55 Ethanolamine                      | [M+K] <sup>+</sup>   | C2H7NO   | 100.01592                        | 8.7E+04            | 1.4                    |                        |                        |                        |                        |         |
| 56 2-Piperidinone                    | [M+H] <sup>+</sup>   | C5H9NO   | 100.07573                        |                    |                        |                        |                        |                        | 1.7E+05                | -0.4    |
| 57 Cyclohexylamine                   | [M+H] <sup>+</sup>   | C6H13N   | 100.11204                        |                    |                        |                        |                        |                        | 1.1E+05                | 0.4     |
| 58 Glycol                            | [M+K] <sup>+</sup>   | C2H6O2   | 100.99994                        | 6.8E+04            | 0.7                    |                        |                        |                        |                        |         |
| 59 Tiglic acid                       | [M+H] <sup>+</sup>   | C5H8O2   | 101.05931                        |                    | 1.8E+05                | 3.9                    | 4.4E+05                | -4.6                   |                        |         |
| 60 Hexanal                           | [M+H] <sup>+</sup>   | C6H12O   | 101.09590                        |                    |                        |                        |                        | 8.7E+04                | 1.9                    |         |
| 61 Pyridine                          | [M+Na] <sup>+</sup>  | C5H5N    | 102.03137                        |                    | 1.5E+05                | 0.5                    | 1.4E+05                | -2.7                   | 8.3E+04                | -3.3    |
| 62 1-Aminocyclopropane-1-carboxylate | [M+H] <sup>+</sup>   | C4H7NO2  | 102.05460                        |                    |                        |                        |                        | 1.3E+05                | 3.5                    | 1.6E+05 |
| 63 5-Aminopentanal                   | [M+H] <sup>+</sup>   | C5H11NO  | 102.09071                        |                    |                        |                        |                        |                        | 1.1E+05                | 5.0     |
| 64 Ethylenethiourea                  | [M+H] <sup>+</sup>   | C3H6N2S  | 103.03287                        |                    |                        |                        |                        | 8.5E+04                | -4.1                   |         |
| 65 Succinic acid semialdehyde        | [M+H] <sup>+</sup>   | C4H6O3   | 103.03856                        |                    |                        |                        |                        |                        | 1.2E+05                | 4.0     |
| 66 N-Nitrosodiethylamine             | [M+H] <sup>+</sup>   | C4H10N2O | 103.08690                        |                    |                        |                        |                        | 9.4E+04                | -3.0                   |         |
| 67 Hexanol                           | [M+H] <sup>+</sup>   | C6H14O   | 103.11149                        |                    |                        |                        |                        | 8.6E+04                | 2.4                    |         |
| 68 Cadaverine                        | [M+H] <sup>+</sup>   | C5H14N2  | 103.12283                        |                    |                        |                        | 1.0E+05                | 1.4                    |                        |         |
| 69 Sulfite                           | [M+Na] <sup>+</sup>  | H2SO3    | 104.96205                        |                    | 1.6E+05                | -3.5                   |                        |                        |                        |         |
| 70 Allophanic acid                   | [M+H] <sup>+</sup>   | C2H4N2O3 | 105.02947                        | 7.6E+04            | -1.9                   |                        |                        |                        |                        |         |
| 71 Cyanopyridine                     | [M+H] <sup>+</sup>   | C6H4N2   | 105.04454                        |                    |                        |                        |                        | 2.2E+05                | 1.8                    | 9.5E+04 |
| 72 Hydroxybutanoic acid              | [M+H] <sup>+</sup>   | C4H8O3   | 105.05468                        |                    |                        |                        | 8.8E+04                | -0.6                   |                        |         |
| 73 Styrene                           | [M+H] <sup>+</sup>   | C8H8     | 105.06979                        |                    |                        |                        | 1.3E+05                | 0.8                    |                        |         |
| 74 3-Butyn-1-al                      | [M+K] <sup>+</sup>   | C4H4O    | 106.98937                        | 8.1E+04            | 1.5                    |                        |                        |                        |                        |         |
| 75 Isoprene                          | [M+K] <sup>+</sup>   | C5H8     | 107.02576                        | 9.0E+04            | 1.5                    |                        |                        |                        | 9.0E+04                | 0.0     |
| 76 Aminoimidazole                    | [M+Na] <sup>+</sup>  | C2H4N4   | 107.03329                        |                    |                        |                        | 1.2E+05                | -4.4                   |                        |         |
| 77 Glyceric acid                     | [M+H] <sup>+</sup>   | C3H6O4   | 107.03381                        |                    | 1.0E+05                | 0.7                    | 1.2E+05                | 4.6                    |                        |         |
| 78 Cyclohexane                       | [M+Na] <sup>+</sup>  | C6H12    | 107.08337                        |                    |                        |                        |                        |                        | 1.3E+05                | -2.3    |
| 79 Iso-Valeraldehyde                 | [M+Na] <sup>+</sup>  | C5H10O   | 109.06202                        |                    | 2.6E+05                | 3.4                    |                        |                        |                        |         |



| # Putative Annotation <sup>a</sup> | Ion                 | Formula  | m/z <sub>Theo.</sub> <sup>b</sup> | R2020 <sup>c</sup> | ppm W2020 <sup>c</sup> | ppm B2020 <sup>c</sup> | ppm R2021 <sup>c</sup> | ppm W2021 <sup>c</sup> | ppm B2021 <sup>c</sup> | ppm          |
|------------------------------------|---------------------|----------|-----------------------------------|--------------------|------------------------|------------------------|------------------------|------------------------|------------------------|--------------|
| 80 3-Buten-1-amine                 | [M+K] <sup>+</sup>  | C4H9N    | 110.03670                         |                    |                        |                        |                        | 8.7E+04                | -0.4                   |              |
| 81 Malondialdehyde                 | [M+K] <sup>+</sup>  | C3H4O2   | 110.98346                         |                    | 1.6E+05                | 5.0                    |                        |                        |                        |              |
| 82 Resorcinol                      | [M+H] <sup>+</sup>  | C6H6O2   | 111.04365                         |                    | 1.9E+05                | 3.7                    | 4.3E+06                | -3.5                   |                        |              |
| 83 Putrescine                      | [M+Na] <sup>+</sup> | C4H12N2  | 111.08907                         |                    |                        |                        |                        | 9.9E+04                | 1.8                    |              |
| 84 N-(Aminomethyl)urea             | [M+Na] <sup>+</sup> | C2H7N3O  | 112.04786                         |                    |                        | 2.9E+05                | 2.4                    |                        |                        |              |
| 85 Lactic acid                     | [M+Na] <sup>+</sup> | C3H6O3   | 113.02089                         |                    | 2.0E+05                | 0.2                    |                        |                        |                        |              |
| 86 Furoic acid                     | [M+H] <sup>+</sup>  | C5H4O3   | 113.02314                         |                    |                        | 3.0E+05                | 1.6                    |                        |                        |              |
| 87 Butanol                         | [M+K] <sup>+</sup>  | C4H10O   | 113.03625                         |                    |                        |                        | 8.1E+04                | 0.7                    | 8.3E+04                | 5.0          |
| 88 Butanediol                      | [M+Na] <sup>+</sup> | C4H10O2  | 113.05782                         |                    | 2.7E+05                | -4.6                   |                        |                        |                        |              |
| 89 Aleprolic acid                  | [M+H] <sup>+</sup>  | C6H8O2   | 113.05971                         | 1.1E+05            | 0.7                    |                        |                        |                        |                        |              |
| 90 2-heptenal                      | [M+H] <sup>+</sup>  | C7H12O   | 113.09599                         |                    | 1.1E+05                | 0.9                    |                        |                        |                        | 1.1E+05 -4.5 |
| 91 epsilon-Caprolactam             | [M+H] <sup>+</sup>  | C6H11NO  | 114.09109                         |                    | 1.9E+05                | 2.2                    |                        |                        |                        |              |
| 92 Glycerol                        | [M+Na] <sup>+</sup> | C3H8O3   | 115.03653                         |                    | 3.2E+05                | 0.3                    |                        |                        |                        |              |
| 93 3-oxo-4-pentenoic acid          | [M+H] <sup>+</sup>  | C5H6O3   | 115.03917                         |                    |                        | 3.1E+05                | -1.7                   |                        |                        |              |
| 94 Hydrosorbic acid                | [M+H] <sup>+</sup>  | C6H10O2  | 115.07540                         |                    | 1.1E+05                | -0.4                   |                        |                        |                        |              |
| 95 3-Amino-2-piperidone            | [M+H] <sup>+</sup>  | C5H10N2O | 115.08707                         |                    |                        |                        | 9.0E+04                | -4.2                   |                        |              |
| 96 Maleamic acid                   | [M+H] <sup>+</sup>  | C4H5NO3  | 116.03413                         |                    |                        |                        | 9.2E+04                | 0.8                    | 1.0E+05                | -4.9         |
| 97 Proline                         | [M+H] <sup>+</sup>  | C5H9NO2  | 116.07060                         | 4.8E+05            | 2.3                    | 1.6E+05                | -3.4                   |                        |                        |              |
| 98 Aminopentanamide                | [M+H] <sup>+</sup>  | C5H12N2O | 117.10176                         |                    |                        |                        |                        | 9.8E+04                | 4.1                    | 1.4E+05 -3.0 |
| 99 Valine                          | [M+H] <sup>+</sup>  | C5H11NO2 | 118.08626                         | 1.9E+05            | 2.2                    | 2.2E+05                | 2.4                    |                        |                        |              |
| 100 Pyrimidine                     | [M+K] <sup>+</sup>  | C4H4N2   | 119.00065                         |                    |                        | 1.3E+05                | -0.4                   |                        |                        |              |
| 101 Sorbaldehyde                   | [M+Na] <sup>+</sup> | C6H8O    | 119.04662                         |                    |                        | 1.1E+05                | 1.0                    |                        |                        |              |
| 102 Hydroxy-isovaleric acid        | [M+H] <sup>+</sup>  | C5H10O3  | 119.07118                         |                    |                        |                        |                        |                        | 1.0E+05                | -1.9         |
| 103 2-Phenylpropene                | [M+H] <sup>+</sup>  | C9H10    | 119.08520                         |                    |                        |                        |                        |                        | 9.0E+04                | 2.7          |
| 104 Aminomalonic acid              | [M+H] <sup>+</sup>  | C3H5NO4  | 120.02913                         | 7.9E+04            | -1.6                   |                        |                        |                        |                        |              |
| 105 Hexenal                        | [M+Na] <sup>+</sup> | C6H10O   | 121.06195                         |                    |                        | 2.6E+05                | 3.6                    |                        |                        |              |
| 106 Phenylethylamine               | [M+H] <sup>+</sup>  | C8H11N   | 122.09592                         |                    |                        |                        |                        | 1.5E+06                | 4.1                    | 2.3E+06 -4.4 |
| 107 Mercaptolactic acid            | [M+H] <sup>+</sup>  | C3H6O3S  | 123.01104                         | 8.8E+04            | -4.8                   |                        |                        |                        |                        |              |
| 108 Tiglic acid                    | [M+Na] <sup>+</sup> | C5H8O2   | 123.04165                         | 7.0E+04            | 2.9                    | 1.1E+05                | 3.7                    | 4.5E+06                | -4.8                   |              |
| 109 Benzoic acid                   | [M+H] <sup>+</sup>  | C7H6O2   | 123.04455                         |                    |                        |                        |                        | 1.7E+05                | -4.0                   |              |
| 110 Erythritol                     | [M+H] <sup>+</sup>  | C4H10O4  | 123.06519                         | 1.0E+05            | -3.0                   |                        |                        |                        |                        |              |
| 111 Nicotinic acid                 | [M+H] <sup>+</sup>  | C6H5NO2  | 124.03930                         | 8.7E+04            | -3.3                   |                        |                        |                        | 1.5E+05                | -3.1         |
| 112 Aminopentanal                  | [M+Na] <sup>+</sup> | C5H11NO  | 124.07361                         |                    |                        |                        | 7.5E+04                | -2.6                   |                        |              |
| 113 Valeric acid                   | [M+Na] <sup>+</sup> | C5H10O2  | 125.05650                         |                    |                        | 9.4E+05                | 5.0                    |                        |                        |              |
| 114 Methylimidazole acetaldehyde   | [M+H] <sup>+</sup>  | C6H8N2O  | 125.07112                         |                    | 1.1E+05                | -1.4                   |                        |                        |                        |              |
| 115 Maltol                         | [M+H] <sup>+</sup>  | C6H6O3   | 127.03937                         |                    |                        |                        |                        | 2.1E+05                | -3.1                   |              |
| 116 Thymine                        | [M+H] <sup>+</sup>  | C5H6N2O2 | 127.05020                         | 1.1E+05            | 1.2                    |                        |                        |                        |                        |              |
| 117 Pentanol                       | [M+K] <sup>+</sup>  | C5H12O   | 127.05196                         |                    |                        |                        |                        |                        | 1.1E+05                | 0.1          |
| 118 5-Amino-4-imidazolecarboxamide | [M+H] <sup>+</sup>  | C4H6N4O  | 127.06206                         |                    |                        |                        |                        | 9.5E+04                | -4.9                   |              |
| 119 2-octenal                      | [M+H] <sup>+</sup>  | C8H14O   | 127.11140                         |                    |                        |                        | 7.8E+04                | 2.7                    |                        |              |

| # Putative Annotation <sup>a</sup> | Ion                 | Formula   | m/z <sub>Theo.</sub> <sup>b</sup> | R2020 <sup>c</sup> | ppm W2020 <sup>c</sup> | ppm B2020 <sup>c</sup> | ppm R2021 <sup>c</sup> | ppm W2021 <sup>c</sup> | ppm B2021 <sup>c</sup> | ppm  |
|------------------------------------|---------------------|-----------|-----------------------------------|--------------------|------------------------|------------------------|------------------------|------------------------|------------------------|------|
| 120 Coniine                        | [M+H] <sup>+</sup>  | C8H17N    | 128.14338                         | 7.4E+04            | 1.4                    |                        |                        |                        |                        |      |
| 121 6-hydroxy-2-hexynoic acid      | [M+H] <sup>+</sup>  | C6H8O3    | 129.05461                         |                    |                        |                        |                        | 3.4E+05                | 0.1                    |      |
| 122 Azulene                        | [M+H] <sup>+</sup>  | C10H8     | 129.07017                         |                    |                        | 2.0E+05 -2.3           |                        |                        |                        |      |
| 123 3-isopropyl-3-butenic acid     | [M+H] <sup>+</sup>  | C7H12O2   | 129.09132                         |                    |                        |                        | 7.5E+04 -2.4           |                        |                        |      |
| 124 3-Aminopropane-1,2-diol        | [M+K] <sup>+</sup>  | C3H9NO2   | 130.02649                         | 1.2E+05            | 3.6                    |                        |                        |                        |                        |      |
| 125 Oxoproline                     | [M+H] <sup>+</sup>  | C5H7NO3   | 130.04987                         | 4.1E+05            | 0.6                    |                        |                        |                        |                        |      |
| 126 Pipecolic acid                 | [M+H] <sup>+</sup>  | C6H11NO2  | 130.08626                         | 1.6E+05            | 0.2                    |                        |                        |                        |                        |      |
| 127 Dimethylbiguanide              | [M+H] <sup>+</sup>  | C4H11N5   | 130.10874                         |                    |                        |                        | 8.9E+04 -0.1           |                        |                        |      |
| 128 Octylamine                     | [M+H] <sup>+</sup>  | C8H19N    | 130.15860                         |                    |                        | 2.8E+05 3.3            |                        |                        |                        |      |
| 129 Leucine                        | [M+H] <sup>+</sup>  | C6H13NO2  | 132.10191                         | 8.0E+05            | 1.0                    | 2.5E+05 -1.3           |                        |                        |                        |      |
| 130 Resorcinol                     | [M+Na] <sup>+</sup> | C6H6O2    | 133.02522                         |                    |                        |                        | 9.3E+04 5.0            |                        |                        |      |
| 131 Imidazole acetaldehyde         | [M+Na] <sup>+</sup> | C5H6N2O   | 133.03699                         |                    |                        |                        |                        | 2.0E+06                | 1.8                    |      |
| 132 Asparagine                     | [M+H] <sup>+</sup>  | C4H8N2O3  | 133.06077                         | 3.7E+05            | -0.3                   |                        |                        |                        |                        |      |
| 133 Dicyclopentadiene              | [M+H] <sup>+</sup>  | C10H12    | 133.10118                         | 1.2E+05            | -2.8                   |                        |                        |                        |                        |      |
| 134 Aminomethylphosphonic acid     | [M+Na] <sup>+</sup> | CH6NO3P   | 133.99754                         |                    |                        |                        |                        | 7.5E+04                | 1.6                    |      |
| 135 Hydroxypyridine                | [M+K] <sup>+</sup>  | C5H5NO    | 134.00012                         |                    |                        |                        |                        |                        | 1.0E+05                | 1.1  |
| 136 Methylthiobutanaldoxime        | [M+H] <sup>+</sup>  | C5H11NOS  | 134.06341                         | 1.2E+05            | -1.5                   |                        |                        |                        |                        |      |
| 137 Tetrahydroisoquinoline         | [M+H] <sup>+</sup>  | C9H11N    | 134.09636                         |                    |                        |                        |                        |                        | 8.5E+04                | 0.5  |
| 138 Malic acid                     | [M+H] <sup>+</sup>  | C4H6O5    | 135.02885                         |                    |                        |                        | 1.6E+05 -0.4           | 1.7E+05                | -4.8                   |      |
| 139 Ureidoglycolate                | [M+H] <sup>+</sup>  | C3H6N2O4  | 135.04042                         |                    |                        | 1.0E+05 -2.9           |                        |                        |                        |      |
| 140 Adenine                        | [M+H] <sup>+</sup>  | C5H5N5    | 136.06177                         | 6.9E+04            | 2.6                    |                        |                        |                        |                        |      |
| 141 epsilon-Caprolactam            | [M+Na] <sup>+</sup> | C6H11NO   | 136.07338                         |                    |                        |                        | 7.0E+04 -0.7           |                        |                        |      |
| 142 Phenylacetamide                | [M+H] <sup>+</sup>  | C8H9NO    | 136.07543                         |                    |                        |                        |                        | 2.1E+05                | 1.9                    |      |
| 143 Hydrosorbic acid               | [M+Na] <sup>+</sup> | C6H10O2   | 137.05679                         |                    |                        | 1.6E+05 3.7            |                        |                        |                        |      |
| 144 Vinylcatechol                  | [M+H] <sup>+</sup>  | C8H8O2    | 137.05930                         |                    |                        |                        |                        | 2.7E+05                | 3.0                    |      |
| 145 Tetrahydropteridine            | [M+H] <sup>+</sup>  | C6H8N4    | 137.08217                         | 7.6E+04 -0.2       |                        |                        |                        |                        |                        |      |
| 146 Myrcene                        | [M+H] <sup>+</sup>  | C10H16    | 137.13305                         |                    |                        |                        | 7.6E+05 -4.2           |                        |                        |      |
| 147 Succinimide                    | [M+K] <sup>+</sup>  | C4H5NO2   | 137.99560                         |                    |                        | 1.0E+05 -3.0           |                        |                        |                        |      |
| 148 Proline                        | [M+Na] <sup>+</sup> | C5H9NO2   | 138.05177                         |                    |                        | 1.3E+05 1.8            |                        |                        |                        |      |
| 149 Trigonelline                   | [M+H] <sup>+</sup>  | C7H7NO2   | 138.05495                         | 1.1E+05            | 3.9                    |                        |                        | 1.4E+05                | 0.8                    |      |
| 150 Tyramine                       | [M+H] <sup>+</sup>  | C8H11NO   | 138.09120                         |                    |                        |                        |                        | 2.6E+05                | 1.0                    |      |
| 151 Tiglic acid                    | [M+K] <sup>+</sup>  | C5H8O2    | 139.01474                         |                    |                        |                        | 8.5E+04 1.8            |                        |                        |      |
| 152 Levulinic acid                 | [M+Na] <sup>+</sup> | C5H8O3    | 139.03652                         | 1.6E+05            | 0.3                    |                        | 1.2E+05 -3.9           |                        |                        |      |
| 153 Hydroxybenzoic acid            | [M+H] <sup>+</sup>  | C7H6O3    | 139.03869                         |                    |                        |                        |                        | 8.3E+05                | 2.0                    |      |
| 154 Urocanic acid                  | [M+H] <sup>+</sup>  | C6H6N2O2  | 139.05020                         | 1.1E+06            | 0.7                    | 5.8E+05 2.6            |                        |                        |                        |      |
| 155 Caproaldehyde                  | [M+K] <sup>+</sup>  | C6H12O    | 139.05144                         |                    |                        |                        | 1.4E+05 3.8            |                        |                        |      |
| 156 Aspartate-semialdehyde         | [M+Na] <sup>+</sup> | C4H7NO3   | 140.03144                         |                    |                        | 2.0E+05 2.7            |                        |                        |                        |      |
| 157 Methylaminoethylphosphonate    | [M+H] <sup>+</sup>  | C3H10NO3P | 140.04714                         |                    |                        |                        |                        |                        | 7.5E+04                | -0.2 |
| 158 Aminopentanal                  | [M+K] <sup>+</sup>  | C5H11NO   | 140.04790                         |                    |                        | 1.4E+05 -4.8           |                        |                        |                        |      |
| 159 Valine                         | [M+Na] <sup>+</sup> | C5H11NO2  | 140.06776                         |                    |                        | 3.2E+05 3.1            |                        |                        |                        |      |

| # Putative Annotation <sup>a</sup>      | Ion                 | Formula   | m/z <sub>Theo.</sub> <sup>b</sup> | R2020 <sup>c</sup> | ppm W2020 <sup>c</sup> | ppm B2020 <sup>c</sup> | ppm R2021 <sup>c</sup> | ppm W2021 <sup>c</sup> | ppm B2021 <sup>c</sup> | ppm  |
|-----------------------------------------|---------------------|-----------|-----------------------------------|--------------------|------------------------|------------------------|------------------------|------------------------|------------------------|------|
| 160 Succinic acid                       | [M+Na] <sup>+</sup> | C4H6O4    | 141.01619                         |                    | 1.3E+05                | -2.6                   |                        |                        |                        |      |
| 161 N-Nitrosodiethylamine               | [M+K] <sup>+</sup>  | C4H10N2O  | 141.04247                         | 7.8E+04            | 1.5                    |                        |                        |                        |                        |      |
| 162 Hydroxymethylcatechol               | [M+H] <sup>+</sup>  | C7H8O3    | 141.05430                         |                    | 1.7E+05                | 2.3                    |                        |                        |                        |      |
| 163 Octadienoic acid                    | [M+H] <sup>+</sup>  | C8H12O2   | 141.09065                         |                    |                        |                        |                        | 3.9E+06                | 2.5                    |      |
| 164 Diaminopropanoate                   | [M+K] <sup>+</sup>  | C3H8N2O2  | 143.02174                         | 7.0E+04            | -1.0                   |                        |                        |                        |                        |      |
| 165 Erythrose                           | [M+Na] <sup>+</sup> | C4H8O4    | 143.03145                         |                    |                        |                        |                        |                        | 7.3E+04                | 0.2  |
| 166 Purine                              | [M+Na] <sup>+</sup> | C5H4N4    | 143.03281                         |                    |                        |                        | 7.1E+04                | 0.1                    | 3.1E+05                | -0.6 |
| 167 7-hydroxy-5-heptynoic acid          | [M+H] <sup>+</sup>  | C7H10O3   | 143.07027                         | 1.1E+05            | -1.8                   |                        |                        |                        |                        |      |
| 168 Octenoic acid                       | [M+H] <sup>+</sup>  | C8H14O2   | 143.10736                         |                    |                        |                        | 1.7E+05                | -4.9                   |                        |      |
| 169 Proline betaine                     | [M+H] <sup>+</sup>  | C7H13NO2  | 144.10147                         |                    | 1.4E+05                | 3.0                    | 8.3E+04                | -3.4                   |                        |      |
| 170 Glyceric acid                       | [M+K] <sup>+</sup>  | C3H6O4    | 144.98936                         |                    | 1.6E+05                | 2.8                    | 9.8E+04                | 4.1                    | 1.1E+05                | -3.1 |
| 171 Mercaptolactic acid                 | [M+Na] <sup>+</sup> | C3H6O3S   | 144.99299                         | 1.9E+05            | -4.4                   |                        |                        |                        |                        |      |
| 172 Nicotinamide                        | [M+Na] <sup>+</sup> | C6H6N2O   | 145.03666                         |                    |                        |                        | 9.8E+04                | 4.0                    |                        |      |
| 173 Erythritol                          | [M+Na] <sup>+</sup> | C4H10O4   | 145.04713                         | 8.3E+04            | 4.9                    |                        | 1.1E+05                | -4.1                   | 1.9E+05                | 0.6  |
| 174 n-valeryl acetic acid               | [M+H] <sup>+</sup>  | C7H12O3   | 145.08636                         |                    |                        |                        | 9.4E+04                | -3.0                   |                        |      |
| 175 4-Amino-1-piperidinecarboxylic acid | [M+H] <sup>+</sup>  | C6H12N2O2 | 145.09683                         |                    |                        |                        |                        |                        | 7.3E+04                | 2.2  |
| 176 Guanidinobutanamide                 | [M+H] <sup>+</sup>  | C5H12N4O  | 145.10792                         |                    |                        |                        | 8.0E+04                | 3.2                    |                        |      |
| 177 1-(3-Aminopropyl)-4-aminobutanal    | [M+H] <sup>+</sup>  | C7H16N2O  | 145.13295                         |                    |                        |                        |                        |                        | 7.8E+04                | 4.1  |
| 178 Allysine                            | [M+H] <sup>+</sup>  | C6H11NO3  | 146.08079                         |                    |                        |                        |                        |                        | 8.2E+04                | 2.6  |
| 179 Orcinol                             | [M+Na] <sup>+</sup> | C7H8O2    | 147.04204                         |                    |                        |                        | 9.4E+04                | -2.7                   |                        |      |
| 180 N-Propanoylimidazole                | [M+Na] <sup>+</sup> | C6H8N2O   | 147.05218                         |                    |                        |                        |                        | 4.9E+05                | 4.8                    |      |
| 181 Glutamine                           | [M+H] <sup>+</sup>  | C5H10N2O3 | 147.07642                         | 1.3E+06            | 0.5                    |                        |                        |                        |                        |      |
| 182 2,4-octadienal                      | [M+Na] <sup>+</sup> | C8H12O    | 147.07795                         |                    |                        |                        | 6.3E+04                | 0.6                    |                        |      |
| 183 Lysine                              | [M+H] <sup>+</sup>  | C6H14N2O2 | 147.11280                         | 6.2E+05            | 0.2                    | 1.2E+05                | -0.5                   | 3.3E+05                | 3.8                    |      |
| 184 Glutamic acid                       | [M+H] <sup>+</sup>  | C5H9NO4   | 148.06043                         | 4.3E+05            | 1.5                    |                        |                        |                        |                        |      |
| 185 Dihydroxyfumaric acid               | [M+H] <sup>+</sup>  | C4H4O6    | 149.00745                         |                    |                        |                        | 1.7E+06                | 4.1                    | 2.5E+06                | -2.7 |
| 186 Anethole                            | [M+H] <sup>+</sup>  | C10H12O   | 149.09609                         |                    |                        |                        |                        |                        | 1.1E+05                | 2.2  |
| 187 Trihydroxypyridine                  | [M+Na] <sup>+</sup> | C5H5NO3   | 150.01602                         |                    | 1.9E+05                | 1.0                    |                        |                        |                        |      |
| 188 Methionine                          | [M+H] <sup>+</sup>  | C5H11NO2S | 150.05893                         |                    |                        |                        |                        |                        | 1.7E+05                | -4.0 |
| 189 Triethanolamine                     | [M+H] <sup>+</sup>  | C6H15NO3  | 150.11247                         | 2.8E+05            | 1.5                    |                        |                        |                        |                        |      |
| 190 Sorbic acid                         | [M+K] <sup>+</sup>  | C6H8O2    | 151.01550                         |                    | 1.5E+05                | 0.6                    |                        |                        |                        |      |
| 191 Ribose                              | [M+H] <sup>+</sup>  | C5H10O5   | 151.06010                         | 2.5E+05            | 4.1                    |                        |                        |                        |                        |      |
| 192 Dipropyl disulfide                  | [M+H] <sup>+</sup>  | C6H14S2   | 151.06091                         | 2.5E+05            | -1.6                   |                        | 4.6E+04                | 0.5                    | 7.6E+04                | 0.4  |
| 193 Methylhypoxanthine                  | [M+H] <sup>+</sup>  | C6H6N4O   | 151.06208                         |                    |                        |                        | 3.5E+05                | -4.3                   |                        |      |
| 194 3-isopropyl-3-butenic acid          | [M+Na] <sup>+</sup> | C7H12O2   | 151.07271                         |                    | 1.3E+05                | 1.6                    |                        |                        |                        |      |
| 195 Hydrocinnamic acid                  | [M+H] <sup>+</sup>  | C9H10O2   | 151.07536                         | 1.9E+05            | 3.7                    |                        |                        |                        |                        |      |
| 196 Carvacrol                           | [M+H] <sup>+</sup>  | C10H14O   | 151.11174                         | 1.7E+05            | -2.9                   | 1.5E+05                | 1.7                    |                        |                        |      |
| 197 Sulfinylpyruvic acid                | [M+H] <sup>+</sup>  | C3H3O5S   | 151.97715                         |                    |                        |                        | 1.0E+05                | 1.6                    |                        |      |
| 198 Cyanuric acid                       | [M+Na] <sup>+</sup> | C3H3N3O3  | 152.00666                         | 8.9E+04            | 2.6                    |                        |                        |                        |                        |      |
| 199 Pyroglutamic acid                   | [M+Na] <sup>+</sup> | C5H7NO3   | 152.03181                         | 1.4E+05            | -3.6                   | 1.0E+05                | -2.3                   |                        |                        |      |

| # Putative Annotation <sup>a</sup>     | Ion                 | Formula   | m/z <sub>Theo.</sub> <sup>b</sup> | R2020 <sup>c</sup> | ppm W2020 <sup>c</sup> | ppm B2020 <sup>c</sup> | ppm R2021 <sup>c</sup> | ppm W2021 <sup>c</sup> | ppm B2021 <sup>c</sup> | ppm             |
|----------------------------------------|---------------------|-----------|-----------------------------------|--------------------|------------------------|------------------------|------------------------|------------------------|------------------------|-----------------|
| 200 epsilon-Caprolactam                | [M+K] <sup>+</sup>  | C6H11NO   | 152.04756                         |                    |                        |                        |                        | 1.4E+05                | -2.2                   |                 |
| 201 Guanine                            | [M+H] <sup>+</sup>  | C5H5N5O   | 152.05669                         | 1.0E+05            | 3.1                    |                        |                        |                        |                        |                 |
| 202 Phenylpropanolamine                | [M+H] <sup>+</sup>  | C9H13NO   | 152.10699                         | 1.1E+05            | 1.0                    |                        |                        |                        |                        |                 |
| 203 2-Hydroxy-2,4-pentadienoate        | [M+K] <sup>+</sup>  | C5H6O3    | 152.99512                         |                    |                        | 1.1E+05                | -1.7                   |                        |                        |                 |
| 204 Allyl sulfide                      | [M+K] <sup>+</sup>  | C6H10S    | 153.01305                         |                    |                        | 9.2E+04                | 2.8                    |                        |                        |                 |
| 205 Alloxanthine                       | [M+H] <sup>+</sup>  | C5H4N4O2  | 153.04002                         |                    |                        |                        |                        |                        |                        | 1.2E+05 4.5     |
| 206 3-Amino-2-piperidone               | [M+K] <sup>+</sup>  | C5H10N2O  | 153.04290                         |                    |                        |                        | 8.9E+04                | -2.8                   |                        |                 |
| 207 2-keto-n-caproic acid              | [M+Na] <sup>+</sup> | C6H10O3   | 153.05204                         |                    | 1.8E+05                | 1.1                    | 9.2E+04                | -0.1                   |                        | 8.2E+04 -2.1    |
| 208 Vanillin                           | [M+H] <sup>+</sup>  | C8H8O3    | 153.05405                         |                    |                        |                        | 2.5E+06                | 3.7                    |                        |                 |
| 209 (4-Aminobutyl) guanidine           | [M+Na] <sup>+</sup> | C5H14N4   | 153.11045                         |                    |                        |                        | 6.2E+05                | 4.0                    | 6.9E+05                | 2.9 5.0E+05 2.9 |
| 210 Myrtenol                           | [M+H] <sup>+</sup>  | C10H16O   | 153.12752                         |                    |                        |                        | 9.2E+05                | -0.8                   |                        |                 |
| 211 Thiocysteine                       | [M+H] <sup>+</sup>  | C3H7NO2S2 | 153.99877                         |                    |                        |                        |                        |                        |                        | 9.1E+04 2.1     |
| 212 Creatine                           | [M+Na] <sup>+</sup> | C4H9N3O2  | 154.05864                         |                    |                        |                        | 1.6E+05                | 0.4                    | 7.2E+04                | 3.0             |
| 213 N-Dimethyl-2-aminoethylphosphonate | [M+H] <sup>+</sup>  | C4H12NO3P | 154.06276                         | 1.8E+05            | 4.6                    |                        |                        |                        |                        | 3.8E+05 -4.4    |
| 214 Leucine                            | [M+Na] <sup>+</sup> | C6H13NO2  | 154.08385                         | 7.0E+04            | -4.6                   | 1.3E+05                | 3.4                    |                        |                        |                 |
| 215 Vanillylamine                      | [M+H] <sup>+</sup>  | C8H11NO2  | 154.08595                         |                    |                        |                        |                        |                        |                        | 1.1E+05 2.0     |
| 216 N-Carbamoylputrescine              | [M+Na] <sup>+</sup> | C5H13N3O  | 154.09538                         |                    |                        |                        | 6.0E+05                | -1.9                   |                        |                 |
| 217 N-Guanylhistamine                  | [M+H] <sup>+</sup>  | C6H11N5   | 154.10839                         |                    |                        |                        |                        |                        |                        | 1.9E+05 2.2     |
| 218 Glutaric acid                      | [M+Na] <sup>+</sup> | C5H8O4    | 155.03177                         |                    | 1.6E+05                | -1.9                   |                        |                        |                        | 6.2E+04 -4.1    |
| 219 Gentisic acid                      | [M+H] <sup>+</sup>  | C7H6O4    | 155.03307                         |                    |                        |                        | 4.4E+05                | 4.2                    | 9.0E+04                | 4.7             |
| 220 Pteridine                          | [M+Na] <sup>+</sup> | C6H4N4    | 155.03310                         |                    |                        |                        |                        |                        | 3.1E+05                | -1.8            |
| 221 Leucinic acid                      | [M+Na] <sup>+</sup> | C6H12O3   | 155.06839                         |                    |                        |                        | 7.5E+04                | -3.4                   |                        |                 |
| 222 Ornithine                          | [M+Na] <sup>+</sup> | C5H12N2O2 | 155.07815                         |                    |                        |                        | 8.2E+05                | 4.9                    |                        |                 |
| 223 Boschnialactone                    | [M+H] <sup>+</sup>  | C9H14O2   | 155.10666                         | 8.8E+04            | 4.9                    |                        |                        |                        | 1.2E+05                | 3.3             |
| 224 Indole                             | [M+K] <sup>+</sup>  | C8H7N     | 156.02142                         |                    |                        |                        | 6.1E+04                | -2.6                   |                        |                 |
| 225 Valine                             | [M+K] <sup>+</sup>  | C5H11NO2  | 156.04214                         | 7.1E+04            | 0.1                    |                        |                        |                        |                        |                 |
| 226 Indolin-2-one                      | [M+Na] <sup>+</sup> | C8H7NO    | 156.04215                         |                    |                        | 9.4E+04                | -1.1                   |                        |                        |                 |
| 227 Valine                             | [M+K] <sup>+</sup>  | C5H11NO2  | 156.04215                         |                    |                        | 9.4E+04                | -0.1                   |                        |                        |                 |
| 228 Histidine                          | [M+H] <sup>+</sup>  | C6H9N3O2  | 156.07675                         | 2.6E+05            | 1.2                    |                        |                        |                        |                        |                 |
| 229 Ketomalonic acid                   | [M+K] <sup>+</sup>  | C3H2O5    | 156.95338                         | 6.8E+04            | 2.1                    |                        |                        |                        |                        |                 |
| 230 Phosphoglycolic acid               | [M+H] <sup>+</sup>  | C2H5O6P   | 156.98929                         |                    |                        |                        | 7.4E+04                | 2.3                    |                        |                 |
| 231 Malic acid                         | [M+Na] <sup>+</sup> | C4H6O5    | 157.01074                         | 1.3E+05            | -3.2                   |                        |                        |                        |                        |                 |
| 232 S-Dimethylsulfonium propionic acid | [M+Na] <sup>+</sup> | C5H10O2S  | 157.02990                         |                    |                        |                        | 6.9E+04                | -3.4                   | 1.3E+05                | -0.4            |
| 233 Dihydropteridine                   | [M+Na] <sup>+</sup> | C6H6N4    | 157.04804                         |                    |                        | 1.2E+05                | 2.7                    |                        |                        |                 |
| 234 Nonane-4,6-dione                   | [M+H] <sup>+</sup>  | C9H16O2   | 157.12248                         |                    |                        |                        |                        |                        | 8.5E+04                | -1.1            |
| 235 Nitrosonaphthalene                 | [M+H] <sup>+</sup>  | C10H7NO   | 158.05933                         |                    |                        |                        | 6.2E+04                | 4.5                    |                        |                 |
| 236 Purine                             | [M+K] <sup>+</sup>  | C5H4N4    | 159.00676                         | 1.3E+05            | 2.2                    |                        |                        |                        |                        |                 |
| 237 Maleylacetate                      | [M+H] <sup>+</sup>  | C6H6O5    | 159.02848                         |                    |                        |                        |                        |                        | 8.7E+04                | 2.0             |
| 238 1,4-Naphthoquinone                 | [M+H] <sup>+</sup>  | C10H6O2   | 159.04406                         | 8.5E+04            | -1.3                   |                        |                        |                        |                        |                 |
| 239 Methylerythritol                   | [M+Na] <sup>+</sup> | C5H12O4   | 159.06278                         | 1.5E+05            | 4.7                    |                        |                        |                        |                        | 1.5E+05 -3.0    |

| # Putative Annotation <sup>a</sup>   | Ion                 | Formula   | m/z <sub>Theo.</sub> <sup>b</sup> | R2020 <sup>c</sup> | ppm W2020 <sup>c</sup> | ppm B2020 <sup>c</sup> | ppm R2021 <sup>c</sup> | ppm W2021 <sup>c</sup> | ppm B2021 <sup>c</sup> | ppm     |
|--------------------------------------|---------------------|-----------|-----------------------------------|--------------------|------------------------|------------------------|------------------------|------------------------|------------------------|---------|
| 240 Tetrahydropteridine              | [M+Na] <sup>+</sup> | C6H8N4    | 159.06409                         |                    |                        |                        | 1.9E+05                | 0.2                    |                        |         |
| 241 Nonatrienal                      | [M+Na] <sup>+</sup> | C9H12O    | 159.07804                         | 9.7E+04            | -1.0                   |                        |                        |                        |                        |         |
| 242 1-decanol                        | [M+H] <sup>+</sup>  | C10H22O   | 159.17427                         |                    |                        |                        |                        |                        | 1.5E+05                | 0.5     |
| 243 Cysteine                         | [M+K] <sup>+</sup>  | C3H7NO2S  | 159.98244                         |                    |                        | 8.0E+04                | 2.9                    |                        |                        |         |
| 244 Trigonelline                     | [M+Na] <sup>+</sup> | C7H7NO2   | 160.03690                         | 9.2E+04            | 0.6                    |                        |                        |                        |                        |         |
| 245 Phenylethylamine                 | [M+K] <sup>+</sup>  | C8H11N    | 160.05232                         |                    | 9.5E+04                | -0.1                   |                        |                        |                        |         |
| 246 4-Methylene-L-glutamate          | [M+H] <sup>+</sup>  | C6H9NO4   | 160.06033                         |                    |                        |                        |                        | 6.0E+04                | 0.7                    |         |
| 247 Dimethylaniline-N-oxide          | [M+Na] <sup>+</sup> | C8H11NO   | 160.07328                         | 9.1E+04            | 1.8                    |                        |                        |                        |                        |         |
| 248 Aminopropylcadaverine            | [M+H] <sup>+</sup>  | C8H21N3   | 160.18115                         |                    |                        |                        |                        |                        | 7.2E+04                | -2.0    |
| 249 Isonicotineamide                 | [M+K] <sup>+</sup>  | C6H6N2O   | 161.01117                         | 3.4E+05            | 2.7                    |                        |                        |                        |                        |         |
| 250 Urocanic acid                    | [M+Na] <sup>+</sup> | C6H6N2O2  | 161.03157                         |                    |                        |                        | 8.4E+04                | 3.6                    |                        |         |
| 251 Hydroxypurine                    | [M+Na] <sup>+</sup> | C5H6N4O   | 161.04272                         |                    |                        |                        |                        | 1.1E+05                | 4.1                    |         |
| 252 Diaminotoluene                   | [M+K] <sup>+</sup>  | C7H10N2   | 161.04756                         | 2.5E+05            | -2.6                   |                        |                        |                        |                        |         |
| 253 Dehydrocarnitine                 | [M+H] <sup>+</sup>  | C7H14NO3  | 161.10453                         |                    |                        | 3.0E+05                | 0.7                    |                        |                        |         |
| 254 S-Allyl-L-cysteine               | [M+H] <sup>+</sup>  | C6H11NO2S | 162.05833                         | 1.4E+05            | -4.1                   |                        |                        |                        |                        |         |
| 255 Carnitinamide                    | [M+H] <sup>+</sup>  | C7H17N2O2 | 162.13692                         |                    |                        | 1.5E+05                | -4.0                   |                        |                        |         |
| 256 Methylimidazole acetaldehyde     | [M+K] <sup>+</sup>  | C6H8N2O   | 163.02682                         | 9.6E+05            | 4.2                    |                        |                        |                        |                        |         |
| 257 Umbelliferone                    | [M+H] <sup>+</sup>  | C9H6O3    | 163.03897                         | 2.1E+06            | 0.9                    |                        |                        |                        |                        |         |
| 258 Octadienoic acid                 | [M+Na] <sup>+</sup> | C8H12O2   | 163.07348                         |                    | 1.5E+05                | -3.2                   | 8.4E+04                | -1.2                   | 1.8E+05                | -1.6    |
| 259 Safrole                          | [M+H] <sup>+</sup>  | C10H10O2  | 163.07545                         |                    |                        | 1.3E+06                | -0.6                   |                        |                        |         |
| 260 Nicotine                         | [M+H] <sup>+</sup>  | C10H14N2  | 163.12297                         | 1.1E+06            | 1.5                    |                        |                        |                        |                        |         |
| 261 Taurine                          | [M+K] <sup>+</sup>  | C2H7NO3S  | 163.97782                         | 3.9E+05            | -4.9                   |                        |                        |                        |                        |         |
| 262 2-Aminoethylphosphonate          | [M+K] <sup>+</sup>  | C2H8NO3P  | 163.98721                         |                    | 7.1E+05                | 0.8                    |                        |                        |                        |         |
| 263 Aminomuconate semialdehyde       | [M+Na] <sup>+</sup> | C6H7NO3   | 164.03181                         | 9.1E+04            | -4.1                   |                        | 6.5E+04                | 3.9                    | 1.2E+05                | 2.8     |
| 264 Histidinol                       | [M+Na] <sup>+</sup> | C6H11N3O  | 164.07994                         |                    |                        | 1.6E+05                | -3.1                   |                        |                        |         |
| 265 N-Methylconiine                  | [M+Na] <sup>+</sup> | C9H19N    | 164.14109                         |                    |                        |                        | 1.1E+05                | -0.7                   | 1.0E+05                | -1.1    |
| 266 5-Amino-4-imidazolecarboxamide   | [M+K] <sup>+</sup>  | C4H6N4O   | 165.01732                         | 1.1E+05            | -2.7                   |                        |                        |                        |                        |         |
| 267 Coumaric acid                    | [M+H] <sup>+</sup>  | C9H8O3    | 165.05462                         | 2.3E+05            | -1.4                   | 6.3E+05                | 3.2                    | 2.0E+06                | 4.6                    | 4.2E+05 |
| 268 2,4-Dimethyl-2E,4E-hexadien-1-ol | [M+K] <sup>+</sup>  | C8H14O    | 165.06790                         |                    |                        |                        |                        | 4.7E+05                | -1.7                   |         |
| 269 Trihydroxypyridine               | [M+K] <sup>+</sup>  | C5H5NO3   | 165.98975                         |                    | 2.0E+05                | 2.1                    |                        |                        |                        |         |
| 270 Guvacine                         | [M+K] <sup>+</sup>  | C6H9NO2   | 166.02649                         | 8.9E+04            | 1.5                    |                        |                        |                        |                        |         |
| 271 Tetrazolyl-glycine               | [M+Na] <sup>+</sup> | C3H5N5O2  | 166.03355                         | 2.0E+05            | -1.8                   |                        |                        | 1.5E+05                | -2.0                   | 1.2E+05 |
| 272 Methylguanine                    | [M+H] <sup>+</sup>  | C6H7N5O   | 166.07178                         |                    |                        |                        | 9.9E+04                | -1.8                   |                        | 1.2E+05 |
| 273 Phenylalanine                    | [M+H] <sup>+</sup>  | C9H11NO2  | 166.08626                         | 1.3E+06            | 1.1                    |                        | 1.7E+05                | -2.7                   | 9.3E+04                | -1.4    |
| 274 Coniine                          | [M+K] <sup>+</sup>  | C8H17N    | 166.09968                         |                    |                        |                        |                        | 2.6E+05                | -2.5                   |         |
| 275 Azulene                          | [M+K] <sup>+</sup>  | C10H8     | 167.02569                         |                    | 5.4E+05                | 0.4                    |                        |                        |                        |         |
| 276 Methylmercaptapurine             | [M+H] <sup>+</sup>  | C6H6N4S   | 167.03793                         |                    | 1.6E+05                | 4.0                    |                        |                        |                        |         |
| 277 Hydroxy-3-nitrosobenzamide       | [M+H] <sup>+</sup>  | C7H6N2O3  | 167.04512                         | 1.7E+05            | 0.5                    |                        |                        |                        |                        |         |
| 278 Noradrenochrome o-semiquinone    | [M+H] <sup>+</sup>  | C8H8NO3   | 167.05769                         | 1.4E+05            | -3.4                   |                        |                        |                        |                        |         |
| 279 Lysine 1,6-lactam                | [M+K] <sup>+</sup>  | C6H12N2O  | 167.05808                         |                    | 3.5E+05                | 0.3                    |                        |                        | 3.1E+05                | 2.4     |

| # Putative Annotation <sup>a</sup>   | Ion                 | Formula   | m/z <sub>Theo.</sub> <sup>b</sup> | R2020 <sup>c</sup> | ppm W2020 <sup>c</sup> | ppm B2020 <sup>c</sup> | ppm R2021 <sup>c</sup> | ppm W2021 <sup>c</sup> | ppm B2021 <sup>c</sup> | ppm          |
|--------------------------------------|---------------------|-----------|-----------------------------------|--------------------|------------------------|------------------------|------------------------|------------------------|------------------------|--------------|
| 280 Caffeyl alcohol                  | [M+H] <sup>+</sup>  | C9H10O3   | 167.07021                         |                    |                        | 4.8E+06                | 0.4                    |                        |                        |              |
| 281 Guanidinobutanamide              | [M+Na] <sup>+</sup> | C5H12N4O  | 167.09033                         | 1.5E+05            | -2.7                   |                        |                        |                        |                        |              |
| 282 Caprylic acid                    | [M+Na] <sup>+</sup> | C8H16O2   | 167.10425                         | 8.7E+04            | -1.4                   |                        |                        | 1.8E+05                | -4.2                   |              |
| 283 1-(3-Aminopropyl)-4-aminobutanal | [M+Na] <sup>+</sup> | C7H16N2O  | 167.11548                         | 7.1E+04            | -0.4                   |                        |                        |                        |                        |              |
| 284 Keto-glutaramic acid             | [M+Na] <sup>+</sup> | C5H7NO4   | 168.02658                         |                    |                        |                        | 1.5E+05                | 0.9                    |                        | 9.8E+04 -3.0 |
| 285 Thioguanine                      | [M+H] <sup>+</sup>  | C5H5N5S   | 168.03444                         |                    |                        |                        | 6.9E+04                | -3.6                   |                        |              |
| 286 Guanidinobutanal                 | [M+K] <sup>+</sup>  | C5H11N3O  | 168.05397                         |                    |                        |                        |                        |                        | 6.9E+04                | -3.6         |
| 287 Allysine                         | [M+Na] <sup>+</sup> | C6H11NO3  | 168.06337                         |                    |                        | 2.2E+05                | -1.5                   |                        |                        |              |
| 288 Dihydrophenylalanine             | [M+H] <sup>+</sup>  | C9H13NO2  | 168.10191                         | 1.0E+05            | -0.1                   |                        |                        |                        |                        |              |
| 289 Lysinamide                       | [M+Na] <sup>+</sup> | C6H15N3O  | 168.11130                         |                    |                        | 3.9E+05                | -3.4                   |                        |                        |              |
| 290 Sulfopyruvic acid                | [M+H] <sup>+</sup>  | C3H4O6S   | 168.98014                         | 3.7E+05            | 1.6                    | 3.6E+05                | 0.5                    |                        | 7.1E+04                | -0.6         |
| 291 Mevaldic acid                    | [M+Na] <sup>+</sup> | C6H10O4   | 169.04713                         | 1.5E+05            | 0.5                    | 2.7E+05                | 2.0                    | 2.3E+05                | -4.1                   | 1.0E+05 -0.2 |
| 292 Vanillic acid                    | [M+H] <sup>+</sup>  | C8H8O4    | 169.04928                         |                    |                        | 3.3E+06                | 1.5                    |                        |                        |              |
| 293 Glutamine                        | [M+Na] <sup>+</sup> | C5H10N2O3 | 169.05836                         | 1.3E+05            | 0.3                    |                        |                        |                        |                        |              |
| 294 Hydroxyisoheptanoic acid         | [M+Na] <sup>+</sup> | C7H14O3   | 169.08312                         |                    |                        |                        | 8.1E+04                | 2.3                    | 2.4E+05                | -2.2         |
| 295 Agmatine                         | [M+K] <sup>+</sup>  | C5H14N4   | 169.08546                         |                    |                        |                        |                        |                        |                        | 5.3E+04 -2.7 |
| 296 Trimethylaminoethylphosphonate   | [M+H] <sup>+</sup>  | C5H15NO3P | 169.08546                         |                    |                        |                        |                        |                        |                        | 5.3E+04 4.6  |
| 297 Lysine                           | [M+Na] <sup>+</sup> | C6H14N2O2 | 169.09491                         |                    |                        | 2.9E+06                | -1.0                   |                        |                        |              |
| 298 Geranic acid                     | [M+H] <sup>+</sup>  | C10H16O2  | 169.12229                         |                    |                        |                        | 7.7E+04                | 0.1                    |                        |              |
| 299 Cysteic acid                     | [M+H] <sup>+</sup>  | C3H7NO5S  | 170.01141                         | 1.2E+05            | 4.3                    |                        | 7.2E+04                | 2.1                    | 1.0E+05                | -4.1         |
| 300 Methylindole                     | [M+K] <sup>+</sup>  | C9H9N     | 170.03666                         | 9.9E+04            | -3.0                   |                        |                        |                        |                        |              |
| 301 Pyridoxine                       | [M+H] <sup>+</sup>  | C8H11NO3  | 170.08117                         | 5.5E+05            | 2.0                    |                        |                        |                        |                        |              |
| 302 Oxaluric acid                    | [M+K] <sup>+</sup>  | C3H4N2O4  | 170.98108                         |                    |                        |                        |                        | 6.6E+04                | -4.8                   |              |
| 303 4-Methylthio-2-oxobutanoic acid  | [M+Na] <sup>+</sup> | C5H8O3S   | 171.00864                         | 7.6E+04            | 4.2                    |                        | 8.1E+04                | 2.0                    |                        |              |
| 304 Asparagine                       | [M+K] <sup>+</sup>  | C4H8N2O3  | 171.01665                         | 9.6E+04            | -2.9                   |                        | 9.8E+04                | 4.3                    | 8.1E+04                | 0.7          |
| 305 Citramalic acid                  | [M+Na] <sup>+</sup> | C5H8O5    | 171.02691                         |                    |                        | 1.5E+05                | -3.0                   |                        |                        |              |
| 306 Methylenediurea                  | [M+K] <sup>+</sup>  | C3H8N4O2  | 171.02788                         | 8.3E+04            | -2.4                   |                        |                        |                        |                        |              |
| 307 Dicyclopentadiene                | [M+K] <sup>+</sup>  | C10H12    | 171.05690                         |                    |                        |                        | 2.3E+05                | 0.9                    |                        |              |
| 308 Mevalonic acid                   | [M+Na] <sup>+</sup> | C6H12O4   | 171.06283                         |                    |                        | 1.3E+05                | -0.3                   |                        |                        |              |
| 309 Dihydroxyphenylethyleneglycol    | [M+H] <sup>+</sup>  | C8H10O4   | 171.06532                         |                    |                        |                        |                        |                        |                        | 5.1E+04 -0.8 |
| 310 Furfural diethyl acetal          | [M+H] <sup>+</sup>  | C9H14O3   | 171.10109                         |                    |                        |                        |                        |                        |                        | 8.0E+04 2.8  |
| 311 Citronellic acid                 | [M+H] <sup>+</sup>  | C10H18O2  | 171.13796                         | 1.0E+05            | -3.5                   |                        | 1.9E+05                | -1.9                   |                        |              |
| 312 2-Undecanone                     | [M+H] <sup>+</sup>  | C11H22O   | 171.17405                         |                    |                        |                        | 8.4E+04                | 1.7                    |                        |              |
| 313 Aspartate                        | [M+K] <sup>+</sup>  | C4H7NO4   | 172.00165                         |                    |                        |                        | 6.2E+04                | -4.7                   |                        |              |
| 314 Ureidoglycine                    | [M+K] <sup>+</sup>  | C3H7N3O3  | 172.01190                         | 6.5E+04            | -3.1                   |                        |                        |                        |                        |              |
| 315 Phenylpropionaldoxim             | [M+Na] <sup>+</sup> | C9H11NO   | 172.07385                         |                    |                        |                        |                        |                        |                        | 2.4E+05 -3.3 |
| 316 6E-Octene-2,4-diyonic acid       | [M+K] <sup>+</sup>  | C8H6O2    | 173.00003                         |                    |                        |                        |                        |                        |                        | 4.9E+04 -0.5 |
| 317 S,S-Dimethyl-beta-propiothetin   | [M+K] <sup>+</sup>  | C5H10O2S  | 173.00331                         | 1.2E+05            | 0.1                    |                        |                        |                        |                        |              |
| 318 Benzenamine sulfate              | [M+H] <sup>+</sup>  | C6H6NO3S  | 173.01347                         |                    |                        |                        |                        | 8.8E+04                | 3.7                    |              |
| 319 Cinnamyl alcohol                 | [M+K] <sup>+</sup>  | C9H10O    | 173.03571                         |                    |                        |                        | 3.4E+05                | 3.6                    |                        |              |

| #   | Putative Annotation <sup>a</sup>    | Ion                 | Formula   | m/z <sub>Theo.</sub> <sup>b</sup> | R2020 <sup>c</sup> | ppm W2020 <sup>c</sup> | ppm B2020 <sup>c</sup> | ppm R2021 <sup>c</sup> | ppm W2021 <sup>c</sup> | ppm B2021 <sup>c</sup> | ppm     |      |         |      |
|-----|-------------------------------------|---------------------|-----------|-----------------------------------|--------------------|------------------------|------------------------|------------------------|------------------------|------------------------|---------|------|---------|------|
| 320 | Ribose                              | [M+Na] <sup>+</sup> | C5H10O5   | 173.04134                         |                    | 2.2E+05                | 4.1                    |                        | 3.4E+05                | -4.1                   |         |      |         |      |
| 321 | (Hydroxyphosphinyl)pyruvate         | [M+Na] <sup>+</sup> | C3H5O5P   | 174.97641                         |                    |                        |                        |                        | 1.2E+05                | 1.6                    |         |      |         |      |
| 322 | Sulfinoalanine                      | [M+Na] <sup>+</sup> | C3H6NO4S  | 174.99097                         | 1.0E+06            | -0.3                   |                        | 2.3E+05                | -5.0                   |                        |         |      |         |      |
| 323 | Threonic acid                       | [M+K] <sup>+</sup>  | C4H8O5    | 174.99995                         |                    |                        |                        |                        | 7.9E+04                | 2.2                    |         |      |         |      |
| 324 | Mercaptopurine                      | [M+Na] <sup>+</sup> | C5H4N4S   | 175.00478                         |                    | 1.2E+05                | 0.6                    |                        |                        |                        |         |      |         |      |
| 325 | N-Methylnicotinamide                | [M+K] <sup>+</sup>  | C7H8N2O   | 175.02732                         |                    |                        |                        |                        | 1.6E+05                | -2.8                   |         |      |         |      |
| 326 | Arabitol                            | [M+Na] <sup>+</sup> | C5H12O5   | 175.05794                         |                    | 2.5E+05                | -1.4                   |                        |                        |                        |         |      |         |      |
| 327 | Shikimic acid                       | [M+H] <sup>+</sup>  | C7H10O5   | 175.05933                         |                    |                        |                        |                        | 1.1E+05                | 4.4                    |         |      |         |      |
| 328 | Suberic acid                        | [M+H] <sup>+</sup>  | C8H14O4   | 175.09727                         |                    |                        |                        | 9.0E+04                | -4.5                   |                        |         |      |         |      |
| 329 | N-Acetylornithine                   | [M+H] <sup>+</sup>  | C7H14N2O3 | 175.10703                         |                    | 1.3E+05                | 3.9                    |                        |                        |                        |         |      |         |      |
| 330 | Dodecapentaenal                     | [M+H] <sup>+</sup>  | C12H14O   | 175.11174                         | 3.4E+06            | -1.6                   |                        |                        |                        |                        |         |      |         |      |
| 331 | Arginine                            | [M+H] <sup>+</sup>  | C6H14N4O2 | 175.11895                         | 1.4E+07            | 0.3                    | 2.1E+05                | 0.1                    | 1.2E+07                | -0.2                   | 1.6E+05 | 0.0  | 3.6E+05 | -0.2 |
| 332 | N-Acetylhistamine                   | [M+Na] <sup>+</sup> | C7H11N3O  | 176.07868                         |                    |                        |                        | 9.8E+04                | 4.3                    |                        |         |      |         |      |
| 333 | Citrulline                          | [M+H] <sup>+</sup>  | C6H13N3O3 | 176.10312                         |                    |                        |                        |                        |                        | 5.8E+04                | -0.9    |      |         |      |
| 334 | Debrisoquine                        | [M+H] <sup>+</sup>  | C10H13N3  | 176.11902                         |                    |                        |                        |                        |                        | 1.2E+05                | -4.5    |      |         |      |
| 335 | Urocanic acid                       | [M+K] <sup>+</sup>  | C6H6N2O2  | 177.00693                         |                    | 5.7E+05                | -4.8                   |                        | 6.0E+05                | -4.1                   |         |      | 1.5E+05 | -3.4 |
| 336 | Imidazole pyruvic acid              | [M+Na] <sup>+</sup> | C6H6N2O3  | 177.02668                         |                    | 1.6E+05                | 2.2                    |                        |                        |                        |         |      |         |      |
| 337 | Tyrosol                             | [M+K] <sup>+</sup>  | C8H10O2   | 177.03124                         | 1.4E+05            | 3.3                    |                        |                        |                        |                        |         |      |         |      |
| 338 | Vanillyl alcohol                    | [M+Na] <sup>+</sup> | C8H10O3   | 177.05296                         |                    |                        |                        | 9.6E+04                | -4.2                   |                        |         |      |         |      |
| 339 | 4-Methylumbelliferone               | [M+H] <sup>+</sup>  | C10H8O3   | 177.05462                         | 3.0E+05            | -2.0                   |                        |                        |                        |                        |         |      |         |      |
| 340 | Allantoic acid                      | [M+H] <sup>+</sup>  | C4H8N4O4  | 177.06101                         | 1.7E+05            | -2.9                   | 3.2E+05                | 4.6                    |                        |                        | 1.8E+05 | 4.1  |         |      |
| 341 | Nonadienal                          | [M+K] <sup>+</sup>  | C9H14O    | 177.06762                         | 2.5E+05            | 3.4                    |                        |                        |                        |                        | 1.5E+05 | -3.9 |         |      |
| 342 | Propylmalate                        | [M+H] <sup>+</sup>  | C7H12O5   | 177.07575                         | 1.3E+05            | -3.7                   | 1.1E+05                | 0.0                    |                        |                        |         |      |         |      |
| 343 | Boschnialactone                     | [M+Na] <sup>+</sup> | C9H14O2   | 177.08869                         |                    |                        |                        |                        | 4.6E+04                | -0.5                   | 1.8E+05 | -4.9 |         |      |
| 344 | Cinnamyl acetate                    | [M+H] <sup>+</sup>  | C11H12O2  | 177.09096                         |                    |                        |                        | 3.3E+06                | 0.3                    |                        |         |      |         |      |
| 345 | 3-Aminopropanesulfonate             | [M+K] <sup>+</sup>  | C3H9NO3S  | 177.99347                         | 3.4E+05            | 1.2                    |                        |                        |                        |                        |         |      |         |      |
| 346 | Methylaminoethylphosphonate         | [M+K] <sup>+</sup>  | C3H10NO3P | 178.00300                         |                    | 3.0E+05                | -0.1                   |                        |                        |                        |         |      |         |      |
| 347 | Nitrocatechol                       | [M+Na] <sup>+</sup> | C6H5NO4   | 178.01163                         |                    |                        |                        |                        | 4.4E+04                | -3.1                   |         |      |         |      |
| 348 | S-(1-propenyl)-L-cysteine sulfoxide | [M+H] <sup>+</sup>  | C6H11NO3S | 178.05324                         | 6.4E+06            | 0.0                    |                        | 8.3E+04                | 1.1                    | 8.5E+05                | -0.8    |      | 5.9E+04 | -1.0 |
| 349 | N-Formyl-L-methionine               | [M+H] <sup>+</sup>  | C6H11NO3S | 178.05324                         | 6.4E+06            | 0.0                    |                        | 8.3E+04                | 1.1                    | 8.5E+05                | -0.8    |      | 5.9E+04 | -1.0 |
| 350 | Alliin                              | [M+H] <sup>+</sup>  | C6H11NO3S | 178.05324                         | 6.4E+06            | 0.0                    |                        | 8.3E+04                | 1.1                    | 8.5E+05                | -0.8    |      | 5.9E+04 | -1.0 |
| 351 | Histidine                           | [M+Na] <sup>+</sup> | C6H9N3O2  | 178.05840                         |                    | 1.0E+05                | 1.7                    |                        |                        |                        |         |      |         |      |
| 352 | Phosphoglycolic acid                | [M+Na] <sup>+</sup> | C2H5O6P   | 178.97138                         |                    |                        |                        |                        | 8.1E+04                | 1.2                    | 7.5E+04 | -3.3 |         |      |
| 353 | Uracil 5-carbaldehyde               | [M+K] <sup>+</sup>  | C5H4N2O3  | 178.98535                         | 1.4E+05            | 3.0                    |                        |                        |                        |                        |         |      |         |      |
| 354 | Imidazolepropionic acid             | [M+K] <sup>+</sup>  | C6H8N2O2  | 179.02241                         |                    |                        |                        |                        | 1.8E+05                | -3.8                   | 1.6E+05 | -4.4 |         |      |
| 355 | Imidazolelactic acid                | [M+Na] <sup>+</sup> | C6H8N2O3  | 179.04271                         | 8.3E+04            | 1.2                    |                        |                        |                        |                        |         |      |         |      |
| 356 | Octadienoic acid                    | [M+K] <sup>+</sup>  | C8H12O2   | 179.04684                         |                    | 1.5E+05                | 0.3                    |                        | 9.8E+04                | 1.8                    |         |      |         |      |
| 357 | Indoleacetonitrile                  | [M+Na] <sup>+</sup> | C10H8N2   | 179.05797                         | 1.5E+05            | -0.8                   |                        |                        |                        |                        |         |      |         |      |
| 358 | 5-oxo-7-octenoic acid               | [M+Na] <sup>+</sup> | C8H12O3   | 179.06786                         | 1.1E+05            | 1.5                    |                        |                        |                        |                        |         |      |         |      |
| 359 | Ferulaldehyde                       | [M+H] <sup>+</sup>  | C10H10O3  | 179.06964                         |                    |                        |                        | 4.2E+06                | 3.5                    |                        |         |      |         |      |

| #   | Putative Annotation <sup>a</sup>       | Ion                  | Formula   | m/z <sub>Theo.</sub> <sup>b</sup> | R2020 <sup>c</sup> | ppm W2020 <sup>c</sup> | ppm B2020 <sup>c</sup> | ppm R2021 <sup>c</sup> | ppm W2021 <sup>c</sup> | ppm B2021 <sup>c</sup> | ppm  |         |         |         |     |
|-----|----------------------------------------|----------------------|-----------|-----------------------------------|--------------------|------------------------|------------------------|------------------------|------------------------|------------------------|------|---------|---------|---------|-----|
| 360 | 2-aminomuconic acid semialdehyde       | [M+K] <sup>+</sup>   | C6H7NO3   | 180.00550                         |                    | 8.0E+04                | 1.4                    |                        |                        |                        |      |         |         |         |     |
| 361 | Isoxanthopterin                        | [M+H] <sup>+</sup>   | C6H5N5O2  | 180.05230                         |                    | 1.0E+05                | -3.9                   |                        |                        |                        |      |         |         |         |     |
| 362 | Glucosamine                            | [M+H] <sup>+</sup>   | C6H13NO5  | 180.08688                         |                    | 1.0E+05                | -1.3                   |                        |                        |                        |      |         |         |         |     |
| 363 | Homophenylalanine                      | [M+H] <sup>+</sup>   | C10H13NO2 | 180.10212                         |                    |                        |                        | 3.3E+05                | -1.2                   | 1.4E+05                | 0.7  | 1.6E+05 | -2.3    | 1.7E+05 | 3.1 |
| 364 | Hydroxymethyluracil                    | [M+K] <sup>+</sup>   | C5H6N2O3  | 181.00100                         | 4.4E+05            | -2.7                   |                        |                        |                        |                        |      |         |         |         |     |
| 365 | Isopropylmaleate                       | [M+Na] <sup>+</sup>  | C7H10O4   | 181.04626                         |                    |                        |                        | 2.0E+06                | 4.8                    | 2.3E+06                | 1.3  | 1.6E+06 | 4.9     |         |     |
| 366 | Caffeic acid                           | [M+H] <sup>+</sup>   | C9H8O4    | 181.04954                         | 2.8E+05            | 0.6                    |                        | 1.4E+06                | 2.8                    |                        |      |         |         |         |     |
| 367 | Coniferyl alcohol                      | [M+H] <sup>+</sup>   | C10H12O3  | 181.08538                         |                    |                        |                        | 7.4E+06                | 3.0                    |                        |      |         |         |         |     |
| 368 | 3-tert-Butyl-5-methylcatechol          | [M+H] <sup>+</sup>   | C11H16O2  | 181.12231                         | 8.5E+04            | 2.0                    |                        |                        |                        |                        |      |         |         |         |     |
| 369 | 4-Methyl-5-(2-hydroxyethyl)-thiazole   | [M+K] <sup>+</sup>   | C6H9NOS   | 182.00361                         |                    |                        |                        | 2.0E+05                | 0.2                    |                        |      |         |         |         |     |
| 370 | Tet-glycine                            | [M+K] <sup>+</sup>   | C3H5N5O2  | 182.00807                         |                    | 8.2E+04                | -3.2                   |                        |                        |                        |      |         |         |         |     |
| 371 | 4-Methylene-L-glutamate                | [M+Na] <sup>+</sup>  | C6H9NO4   | 182.04246                         |                    |                        |                        |                        |                        | 3.9E+05                | -0.5 | 2.8E+05 | 1.2     |         |     |
| 372 | Valerylglycine                         | [M+Na] <sup>+</sup>  | C7H13NO3  | 182.07902                         |                    |                        |                        | 2.0E+05                | -1.4                   |                        |      |         |         |         |     |
| 373 | Tyrosine                               | [M+H] <sup>+</sup>   | C9H11NO3  | 182.08117                         | 7.6E+05            | -0.2                   |                        |                        |                        |                        |      |         |         |         |     |
| 374 | Dicyclohexylamine                      | [M+H] <sup>+</sup>   | C12H23N   | 182.19053                         |                    |                        |                        | 1.9E+05                | -1.1                   | 1.1E+05                | 0.8  |         |         |         |     |
| 375 | Oxadipic acid                          | [M+Na] <sup>+</sup>  | C6H8O5    | 183.02585                         |                    |                        |                        | 6.2E+04                | 3.0                    |                        |      |         |         |         |     |
| 376 | aceto valeric acid                     | [M+K] <sup>+</sup>   | C7H12O3   | 183.04239                         |                    |                        |                        | 7.3E+04                | -3.2                   |                        |      | 8.1E+04 | -4.0    |         |     |
| 377 | Pimelic acid                           | [M+Na] <sup>+</sup>  | C7H12O4   | 183.06241                         |                    | 3.0E+05                | 2.0                    |                        |                        | 4.6E+05                | -1.1 |         |         |         |     |
| 378 | Dihydrocaffeic acid                    | [M+H] <sup>+</sup>   | C9H10O4   | 183.06421                         |                    |                        |                        | 5.5E+06                | 0.3                    |                        |      |         |         |         |     |
| 379 | 5-Oxo-1,2-campholide                   | [M+H] <sup>+</sup>   | C10H14O3  | 183.10185                         |                    |                        |                        | 1.5E+05                | -1.5                   |                        |      |         |         |         |     |
| 380 | Butyro-betaine                         | [M+K] <sup>+</sup>   | C8H18NO   | 183.10200                         | 8.0E+04            | 0.1                    | 1.5E+05                | -3.3                   | 4.2E+06                | -3.4                   |      | 6.8E+04 | -4.3    |         |     |
| 381 | Dihydrostilbene                        | [M+H] <sup>+</sup>   | C14H14    | 183.11683                         | 8.3E+04            | -4.5                   |                        |                        |                        |                        |      |         |         |         |     |
| 382 | Keto-glutaramic acid                   | [M+K] <sup>+</sup>   | C5H7NO4   | 183.99987                         |                    |                        |                        |                        |                        |                        |      | 4.6E+04 | 4.3     |         |     |
| 383 | 4-Amino-2-hydroxylamino-6-nitrotoluene | [M+H] <sup>+</sup>   | C7H9N3O3  | 184.07130                         |                    | 8.6E+04                | 2.0                    |                        |                        |                        |      |         |         |         |     |
| 384 | Carnitinamide                          | [M+Na] <sup>+</sup>  | C7H17N2O2 | 184.11822                         | 1.2E+05            | 3.1                    | 1.5E+05                | -0.1                   |                        |                        |      |         |         |         |     |
| 385 | Carnitinamide                          | [M+Na] <sup>+</sup>  | C7H17N2O2 | 184.11824                         |                    |                        |                        |                        |                        |                        |      |         |         |         |     |
| 386 | 4-Hydroxy-2-oxoglutarate               | [M+Na] <sup>+</sup>  | C5H6O6    | 185.00566                         | 1.8E+06            | 4.1                    |                        |                        |                        |                        |      |         |         |         |     |
| 387 | Allicin                                | [M+Na] <sup>+</sup>  | C6H10OS2  | 185.00653                         | 1.8E+06            | -0.6                   |                        | 1.6E+06                | 0.4                    | 1.6E+05                | 1.5  |         | 1.6E+06 | 0.3     |     |
| 388 | Thiouric acid                          | [M+H] <sup>+</sup>   | C5H4N4O2S | 185.01259                         |                    |                        |                        |                        |                        |                        |      | 6.0E+04 | 1.0     |         |     |
| 389 | Methyleneoxindole                      | [M+K40] <sup>+</sup> | C9H7NO    | 185.01546                         |                    |                        |                        | 6.5E+04                | 4.1                    |                        |      |         |         |         |     |
| 390 | Hydroxycoumarin                        | [M+Na] <sup>+</sup>  | C9H6O3    | 185.02077                         |                    | 1.1E+05                | 0.8                    |                        |                        |                        |      |         |         |         |     |
| 391 | Hydroxyisourate                        | [M+H] <sup>+</sup>   | C5H4N4O4  | 185.03114                         |                    |                        |                        | 2.2E+05                | -3.3                   |                        |      | 1.4E+05 | -1.1    |         |     |
| 392 | Glutamine                              | [M+K] <sup>+</sup>   | C5H10N2O3 | 185.03194                         |                    |                        |                        |                        |                        | 2.8E+05                | 2.0  |         |         |         |     |
| 393 | Hydroxymethyl-glutaric acid            | [M+Na] <sup>+</sup>  | C6H10O5   | 185.04181                         |                    | 9.6E+04                | 1.3                    |                        |                        |                        |      |         |         |         |     |
| 394 | 3-O-Methylgallate                      | [M+H] <sup>+</sup>   | C8H8O5    | 185.04522                         |                    |                        |                        |                        |                        | 1.4E+05                | -4.2 |         |         |         |     |
| 395 | Oleandrose                             | [M+Na] <sup>+</sup>  | C7H14O4   | 185.07880                         |                    | 1.2E+05                | -2.0                   |                        |                        |                        |      |         |         |         |     |
| 396 | Oxo-decenoic acid                      | [M+H] <sup>+</sup>   | C10H16O3  | 185.11748                         |                    |                        |                        | 4.9E+05                | -1.4                   |                        |      |         |         |         |     |
| 397 | Citronellyl formate                    | [M+H] <sup>+</sup>   | C11H20O2  | 185.15428                         |                    | 9.8E+04                | -3.6                   | 2.0E+05                | -4.0                   |                        |      |         |         |         |     |
| 398 | Laurylaldehyde                         | [M+H] <sup>+</sup>   | C12H24O   | 185.19018                         |                    |                        |                        |                        |                        |                        |      | 7.2E+04 | -1.0    |         |     |
| 399 | Fucosamine                             | [M+Na] <sup>+</sup>  | C6H13NO4  | 186.07398                         |                    |                        |                        |                        |                        |                        |      | 7.0E+04 | -1.6    |         |     |



| # Putative Annotation <sup>a</sup>              | Ion                 | Formula   | m/z <sub>Theo.</sub> <sup>b</sup> | R2020 <sup>c</sup> | ppm W2020 <sup>c</sup> | ppm B2020 <sup>c</sup> | ppm R2021 <sup>c</sup> | ppm W2021 <sup>c</sup> | ppm B2021 <sup>c</sup> | ppm          |
|-------------------------------------------------|---------------------|-----------|-----------------------------------|--------------------|------------------------|------------------------|------------------------|------------------------|------------------------|--------------|
| 400 N-Acetylphenylethylamine                    | [M+Na] <sup>+</sup> | C10H13NO  | 186.08967                         |                    |                        |                        |                        | 1.5E+05                | -4.0                   |              |
| 401 Sulfolbenzaldehyde                          | [M+H] <sup>+</sup>  | C7H6O4S   | 187.00683                         |                    |                        | 2.9E+05                | -4.7                   |                        |                        |              |
| 402 O-Carbamoyl-L-serine                        | [M+K] <sup>+</sup>  | C4H8N2O4  | 187.01157                         | 9.9E+04            | 1.1                    |                        |                        |                        |                        |              |
| 403 Cinnamic acid                               | [M+K] <sup>+</sup>  | C9H8O2    | 187.01601                         |                    |                        | 9.3E+04                | -2.3                   |                        |                        |              |
| 404 Angelicin                                   | [M+H] <sup>+</sup>  | C11H6O3   | 187.03897                         | 1.0E+05            | 2.9                    |                        |                        |                        |                        |              |
| 405 Quercitol                                   | [M+Na] <sup>+</sup> | C6H12O5   | 187.05825                         |                    | 1.4E+05                | -3.0                   |                        | 2.4E+05                | -0.7                   |              |
| 406 p-Cumate                                    | [M+Na] <sup>+</sup> | C10H12O2  | 187.07292                         |                    |                        |                        |                        | 1.2E+05                | 0.2                    |              |
| 407 Carboxycyclohexyl-acetic acid               | [M+H] <sup>+</sup>  | C9H14O4   | 187.09621                         |                    |                        |                        |                        | 8.2E+04                | 1.5                    |              |
| 408 Oxo-decanoic acid                           | [M+H] <sup>+</sup>  | C10H18O3  | 187.13358                         |                    |                        |                        |                        |                        | 4.5E+04                | -3.8         |
| 409 Pyridoxolactone                             | [M+Na] <sup>+</sup> | C8H7NO3   | 188.03181                         | 1.5E+05            | 0.6                    |                        |                        |                        |                        |              |
| 410 Methyladenine                               | [M+K] <sup>+</sup>  | C6H7N5    | 188.03384                         |                    | 9.8E+04                | -2.8                   |                        |                        |                        |              |
| 411 L-Methionine S-oxide                        | [M+Na] <sup>+</sup> | C5H11NO3S | 188.03440                         |                    |                        |                        |                        | 9.6E+04                | 4.2                    |              |
| 412 Indoleacrylic acid                          | [M+H] <sup>+</sup>  | C11H9NO2  | 188.07060                         | 3.7E+05            | 0.9                    |                        |                        |                        |                        |              |
| 413 N-Heptanoylglycine                          | [M+H] <sup>+</sup>  | C9H17NO3  | 188.12725                         |                    | 1.8E+05                | 4.6                    |                        |                        |                        |              |
| 414 Tartaric acid                               | [M+K] <sup>+</sup>  | C4H6O6    | 188.97889                         |                    |                        |                        | 4.7E+04                | 3.7                    |                        |              |
| 415 Phenylglyoxylic acid                        | [M+K] <sup>+</sup>  | C8H6O3    | 188.99514                         |                    |                        |                        |                        |                        | 4.7E+04                | -1.5         |
| 416 Ribose                                      | [M+K] <sup>+</sup>  | C5H10O5   | 189.01598                         | 3.4E+05            | 1.5                    |                        |                        |                        |                        |              |
| 417 Dipropyl disulfide                          | [M+K] <sup>+</sup>  | C6H14S2   | 189.01685                         | 3.4E+05            | -3.1                   |                        |                        |                        |                        |              |
| 418 Hydrocinnamic acid                          | [M+K] <sup>+</sup>  | C9H10O2   | 189.03097                         |                    |                        | 1.3E+05                | 1.4                    |                        |                        |              |
| 419 Caffeyl alcohol                             | [M+Na] <sup>+</sup> | C9H10O3   | 189.05268                         |                    |                        |                        |                        | 3.2E+05                | -2.5                   |              |
| 420 Ramentaceone                                | [M+H] <sup>+</sup>  | C11H8O3   | 189.05531                         |                    |                        |                        | 4.2E+04                | -3.7                   |                        |              |
| 421 2-tridecene-4,7-diynal                      | [M+H] <sup>+</sup>  | C13H16O   | 189.12685                         |                    |                        |                        |                        | 6.1E+04                | 2.9                    |              |
| 422 Homoarginine                                | [M+H] <sup>+</sup>  | C7H16N4O2 | 189.13460                         | 1.8E+05            | 4.5                    |                        |                        |                        |                        |              |
| 423 Guanine                                     | [M+K] <sup>+</sup>  | C5H5N5O   | 190.01257                         | 9.9E+04            | 0.7                    |                        |                        |                        |                        |              |
| 424 2-Dimethylamino-5,6-dimethylpyrimidin-4-ol  | [M+Na] <sup>+</sup> | C8H13N3O  | 190.09516                         |                    |                        | 8.2E+04                | -0.4                   |                        |                        |              |
| 425 3-Mercapto-2-mercaptomethylpropanoate       | [M+K] <sup>+</sup>  | C4H8O2S2  | 190.95892                         |                    |                        |                        | 5.9E+04                | 4.3                    | 1.2E+05                | -3.7         |
| 426 Phosphoenolpyruvic acid                     | [M+Na] <sup>+</sup> | C3H5O6P   | 190.97160                         | 1.1E+05            | -2.0                   |                        | 4.5E+04                | -4.7                   |                        |              |
| 427 Butanoylphosphate                           | [M+Na] <sup>+</sup> | C4H9O5P   | 191.00815                         |                    |                        |                        |                        |                        | 4.7E+04                | -0.9         |
| 428 N1-Methyl-2-pyridone-5-carboxamide          | [M+K] <sup>+</sup>  | C7H8N2O2  | 191.02261                         |                    |                        |                        | 4.2E+05                | -4.6                   |                        |              |
| 429 Arabitol                                    | [M+K] <sup>+</sup>  | C5H12O5   | 191.03256                         |                    | 2.2E+05                | -4.9                   |                        |                        |                        |              |
| 430 Dehydroquinic acid                          | [M+H] <sup>+</sup>  | C7H10O6   | 191.05556                         |                    | 1.2E+05                | -2.9                   |                        |                        |                        |              |
| 431 Ethoxycoumarin                              | [M+H] <sup>+</sup>  | C11H10O3  | 191.06940                         |                    |                        | 4.8E+06                | 4.6                    |                        |                        |              |
| 432 Chrysanthemic acid                          | [M+Na] <sup>+</sup> | C10H16O2  | 191.10389                         | 3.8E+05            | -2.0                   | 3.6E+05                | 1.9                    | 9.9E+04                | -0.5                   | 2.4E+05 -0.9 |
| 433 Hydroxydebrisoquine                         | [M+H] <sup>+</sup>  | C10H13N3O | 192.11256                         |                    | 9.1E+04                | 3.0                    |                        |                        |                        |              |
| 434 N-Butyl-1H-pyrazolo[3,4-d]pyrimidin-4-amine | [M+H] <sup>+</sup>  | C9H13N5   | 192.12426                         |                    |                        |                        |                        | 5.0E+04                | 0.6                    |              |
| 435 Diethylphosphoric acid                      | [M+K] <sup>+</sup>  | C4H11O4P  | 193.00265                         | 3.4E+05            | 2.3                    |                        |                        |                        |                        |              |
| 436 Thiourocanic acid                           | [M+Na] <sup>+</sup> | C6H6N2O2S | 193.00456                         |                    |                        |                        |                        |                        | 2.1E+05                | -1.8         |
| 437 Furfural diethyl acetal                     | [M+Na] <sup>+</sup> | C9H14O3   | 193.08352                         | 1.2E+05            | 4.2                    |                        |                        |                        | 4.7E+04                | 0.2          |
| 438 Myristicin                                  | [M+H] <sup>+</sup>  | C11H12O3  | 193.08494                         |                    | 2.1E+05                | 0.9                    | 1.3E+07                | 4.7                    |                        |              |
| 439 Citronellic acid                            | [M+Na] <sup>+</sup> | C10H18O2  | 193.11990                         | 1.2E+05            | 4.7                    |                        | 8.6E+04                | 4.9                    | 2.5E+05                | 3.3          |

| # Putative Annotation <sup>a</sup>       | Ion                 | Formula    | m/z <sub>Theo.</sub> <sup>b</sup> | R2020 <sup>c</sup> | ppm W2020 <sup>c</sup> | ppm B2020 <sup>c</sup> | ppm R2021 <sup>c</sup> | ppm W2021 <sup>c</sup> | ppm B2021 <sup>c</sup> | ppm                       |
|------------------------------------------|---------------------|------------|-----------------------------------|--------------------|------------------------|------------------------|------------------------|------------------------|------------------------|---------------------------|
| 440 2,4,7-tridecatrienal                 | [M+H] <sup>+</sup>  | C13H20O    | 193.15849                         |                    |                        |                        |                        | 9.4E+04                | 1.0                    |                           |
| 441 Salsoline                            | [M+H] <sup>+</sup>  | C11H15NO2  | 194.11763                         |                    |                        |                        |                        |                        |                        | 2.0E+05 -0.4              |
| 442 Glucuronic acid                      | [M+H] <sup>+</sup>  | C6H10O7    | 195.04993                         | 7.5E+04            | 1.0                    |                        |                        |                        |                        |                           |
| 443 Ferulic acid                         | [M+H] <sup>+</sup>  | C10H10O4   | 195.06519                         | 1.9E+05            | 4.3                    | 2.9E+05                | 3.6                    | 2.7E+06                | 3.9                    | 4.9E+05 3.5               |
| 444 4-n-valeryl butyric acid             | [M+Na] <sup>+</sup> | C9H16O3    | 195.09954                         |                    |                        |                        |                        |                        | 6.2E+05                | -1.9 1.5E+05 0.6          |
| 445 Zingerone                            | [M+H] <sup>+</sup>  | C11H14O3   | 195.10157                         | 6.3E+04            | 2.1                    |                        | 6.5E+06                | 1.6                    |                        |                           |
| 446 Aminomuconic acid                    | [M+K] <sup>+</sup>  | C6H7NO4    | 196.00078                         |                    |                        |                        |                        |                        |                        | 3.9E+04 -0.6              |
| 447 Orthanic acid                        | [M+Na] <sup>+</sup> | C6H7NO3S   | 196.00388                         | 3.7E+05            | -2.1                   | 9.7E+05                | 4.5                    |                        |                        |                           |
| 448 Deoxy-5-aminoshikimic acid           | [M+Na] <sup>+</sup> | C7H11NO4   | 196.05787                         |                    |                        |                        |                        | 7.7E+04                | 0.8                    |                           |
| 449 Glucosaminic acid                    | [M+H] <sup>+</sup>  | C6H13NO6   | 196.08237                         |                    |                        |                        |                        |                        |                        | 4.0E+04 -4.1              |
| 450 N-Acetyl-L-leucine                   | [M+Na] <sup>+</sup> | C8H15NO3   | 196.09453                         |                    |                        |                        | 2.1E+05                | -0.6                   |                        | 8.1E+04 -0.4              |
| 451 Tyrosine methyl ester                | [M+H] <sup>+</sup>  | C10H13NO3  | 196.09633                         |                    |                        |                        | 6.1E+04                | 2.5                    |                        |                           |
| 452 Phenolic phosphate                   | [M+Na] <sup>+</sup> | C6H7O4P    | 196.99677                         |                    |                        |                        |                        | 8.6E+04                | 3.3                    |                           |
| 453 Allantoin                            | [M+K] <sup>+</sup>  | C4H6N4O3   | 197.00773                         |                    | 9.2E+04                | -2.9                   |                        |                        |                        |                           |
| 454 1-Naphthalenemethanol                | [M+K] <sup>+</sup>  | C11H10O    | 197.03620                         |                    |                        |                        | 6.3E+04                | 0.6                    |                        |                           |
| 455 N-Acetylasparagine                   | [M+Na] <sup>+</sup> | C6H10N2O4  | 197.05272                         |                    |                        |                        |                        |                        |                        | 4.0E+04 2.8               |
| 456 Suberic acid                         | [M+Na] <sup>+</sup> | C8H14O4    | 197.07843                         | 1.8E+05            | 0.8                    | 3.6E+05                | -0.3                   | 2.2E+05                | 0.8                    | 4.9E+05 -2.3 1.1E+05 0.6  |
| 457 Xanthoxyl                            | [M+H] <sup>+</sup>  | C10H12O4   | 197.08010                         |                    |                        |                        | 6.2E+06                | 3.7                    |                        |                           |
| 458 N-Acetylornithine                    | [M+Na] <sup>+</sup> | C7H14N2O3  | 197.08883                         |                    |                        |                        |                        |                        |                        | 6.9E+04 4.2               |
| 459 Hydroxy pelargonic acid              | [M+Na] <sup>+</sup> | C9H18O3    | 197.11482                         | 2.4E+05            | 3.4                    | 2.6E+05                | -0.5                   |                        | 1.6E+06                | -1.6 2.5E+05 -0.3         |
| 460 Coryneine                            | [M+H] <sup>+</sup>  | C11H18NO2  | 197.14103                         | 9.3E+04            | -3.0                   |                        |                        |                        |                        |                           |
| 461 Indole-3-acetaldehyde                | [M+K] <sup>+</sup>  | C10H9NO    | 198.03093                         |                    |                        |                        |                        | 5.9E+04                | 3.3                    |                           |
| 462 Dihydroxy-L-phenylalanine            | [M+H] <sup>+</sup>  | C9H11NO4   | 198.07608                         | 6.6E+04            | 0.3                    |                        |                        |                        |                        |                           |
| 463 Citrulline                           | [M+Na] <sup>+</sup> | C6H13N3O3  | 198.08491                         | 6.6E+04            | 2.8                    |                        |                        |                        |                        |                           |
| 464 N-Formimino-L-aspartate              | [M+K] <sup>+</sup>  | C5H8N2O4   | 199.01157                         | 9.0E+04            | -0.1                   | 4.2E+05                | 0.4                    | 1.7E+05                | -1.4                   | 1.1E+05 -2.5 8.3E+04 -0.8 |
| 465 Ascorbic acid                        | [M+Na] <sup>+</sup> | C6H8O6     | 199.02174                         |                    |                        |                        |                        | 6.1E+04                | -2.2                   | 4.6E+04 -2.9              |
| 466 Vanillylmandelic acid                | [M+H] <sup>+</sup>  | C9H10O5    | 199.05932                         |                    |                        | 8.2E+05                | 3.9                    |                        |                        |                           |
| 467 Dehydrocarnitine                     | [M+K] <sup>+</sup>  | C7H14NO3   | 199.06086                         |                    |                        |                        |                        | 4.8E+04                | -1.7                   |                           |
| 468 5-Acetylamino-6-amino-3-methyluracil | [M+H] <sup>+</sup>  | C7H10N4O3  | 199.08188                         |                    |                        |                        |                        |                        |                        | 4.8E+04 3.4               |
| 469 Dihydroxy-octanoic acid              | [M+Na] <sup>+</sup> | C8H16O4    | 199.09440                         |                    | 2.1E+05                | -1.6                   |                        | 9.1E+04                | 3.9                    | 2.0E+05 0.5               |
| 470 Trimethyl-L-histidine                | [M+H] <sup>+</sup>  | C9H16N3O2  | 199.13143                         |                    |                        |                        | 2.5E+05                | 0.5                    |                        |                           |
| 471 Linderic acid                        | [M+H] <sup>+</sup>  | C12H22O2   | 199.16921                         |                    |                        |                        |                        | 9.9E+04                | 0.2                    | 9.8E+04 -4.0              |
| 472 Alliin                               | [M+Na] <sup>+</sup> | C6H11NO3S  | 200.03518                         | 9.4E+05            | 0.4                    |                        |                        |                        |                        |                           |
| 473 S-(1-propenyl)-L-cysteine sulfoxide  | [M+Na] <sup>+</sup> | C6H11NO3S  | 200.03518                         | 9.4E+05            | 0.4                    |                        |                        |                        |                        |                           |
| 474 N-Formyl-L-methionine                | [M+Na] <sup>+</sup> | C6H11NO3S  | 200.03518                         | 9.4E+05            | 0.4                    |                        |                        |                        |                        |                           |
| 475 Methylthiohexanaldoxime              | [M+K] <sup>+</sup>  | C7H15NOS   | 200.05115                         |                    |                        |                        | 8.7E+04                | -2.8                   |                        |                           |
| 476 Dodecanamide                         | [M+H] <sup>+</sup>  | C12H25NO   | 200.20084                         |                    |                        |                        |                        |                        |                        | 3.9E+04 0.3               |
| 477 Umbelliferone                        | [M+K] <sup>+</sup>  | C9H6O3     | 200.99554                         |                    | 1.2E+05                | -3.4                   |                        |                        |                        |                           |
| 478 Cysteinylglycine                     | [M+Na] <sup>+</sup> | C5H10N2O3S | 201.03043                         | 8.7E+04            | -4.4                   |                        |                        |                        |                        |                           |
| 479 Safrole                              | [M+K] <sup>+</sup>  | C10H10O2   | 201.03129                         |                    |                        |                        |                        | 2.0E+05                | -0.3                   |                           |

| #   | Putative Annotation <sup>a</sup>                                | Ion                 | Formula    | m/z <sub>Theo.</sub> <sup>b</sup> | R2020 <sup>c</sup> | ppm W2020 <sup>c</sup> | ppm B2020 <sup>c</sup> | ppm R2021 <sup>c</sup> | ppm W2021 <sup>c</sup> | ppm B2021 <sup>c</sup> | ppm     |
|-----|-----------------------------------------------------------------|---------------------|------------|-----------------------------------|--------------------|------------------------|------------------------|------------------------|------------------------|------------------------|---------|
| 480 | Hydroxy-L-lysine                                                | [M+K] <sup>+</sup>  | C6H14N2O3  | 201.06406                         |                    |                        |                        | 5.7E+04                | -2.3                   |                        |         |
| 481 | Nicotine                                                        | [M+K] <sup>+</sup>  | C10H14N2   | 201.07851                         |                    |                        |                        |                        |                        | 5.1E+04                | 1.7     |
| 482 | Eugenol methyl ether                                            | [M+Na] <sup>+</sup> | C11H14O2   | 201.08860                         | 3.7E+05            | -3.0                   | 1.6E+05                | 3.9                    | 1.2E+05                | 3.9                    |         |
| 483 | Isoxanthopterin                                                 | [M+Na] <sup>+</sup> | C6H5N5O2   | 202.03355                         | 5.9E+04            | -1.7                   |                        | 5.2E+04                | 3.8                    |                        |         |
| 484 | Amino-undecanoic acid                                           | [M+H] <sup>+</sup>  | C11H23NO2  | 202.17940                         |                    |                        |                        |                        |                        | 3.9E+04                | 3.7     |
| 485 | 5-Hydroxy-2-oxo-4-ureido-2,5-dihydro-1H-imidazole-5-carboxylate | [M+H] <sup>+</sup>  | C5H6N4O5   | 203.04120                         |                    |                        |                        | 9.8E+04                | -0.5                   |                        |         |
| 486 | Glucose                                                         | [M+Na] <sup>+</sup> | C6H12O6    | 203.05261                         | 1.7E+06            | -1.4                   | 4.0E+06                | 0.2                    |                        | 5.6E+06                | 0.0     |
| 487 | alpha-Curcumene                                                 | [M+H] <sup>+</sup>  | C15H22     | 203.17943                         | 1.1E+05            | 1.8                    |                        |                        |                        |                        |         |
| 488 | Methionine sulfoxide                                            | [M+K] <sup>+</sup>  | C5H11NO3S  | 204.00916                         |                    |                        |                        | 7.8E+04                | -0.2                   |                        |         |
| 489 | 2-Methyl-3-hydroxy-5-formylpyridine-4-carboxylate               | [M+Na] <sup>+</sup> | C8H7NO4    | 204.02663                         |                    |                        |                        |                        |                        | 3.8E+04                | 0.5     |
| 490 | Acetylcarnitine                                                 | [M+H] <sup>+</sup>  | C9H17NO4   | 204.12359                         |                    |                        |                        | 1.5E+05                | -2.7                   | 4.4E+04                | 0.5     |
| 491 | Succimer                                                        | [M+Na] <sup>+</sup> | C4H6O4S2   | 204.95927                         |                    |                        | 9.4E+04                | 3.4                    |                        |                        |         |
| 492 | Mannitol                                                        | [M+Na] <sup>+</sup> | C6H14O6    | 205.06814                         |                    |                        | 3.9E+05                | 0.6                    |                        | 1.8E+05                | 1.5     |
| 493 | Dihydroconiferyl alcohol                                        | [M+Na] <sup>+</sup> | C10H14O3   | 205.08348                         |                    |                        |                        |                        |                        | 4.0E+04                | 0.2     |
| 494 | 3-Butylidene-7-hydroxyphthalide                                 | [M+H] <sup>+</sup>  | C12H12O3   | 205.08531                         |                    |                        |                        | 1.1E+06                | 3.0                    |                        |         |
| 495 | Tryptophan                                                      | [M+H] <sup>+</sup>  | C11H12N2O2 | 205.09715                         | 5.7E+05            | 2.9                    |                        |                        |                        |                        |         |
| 496 | Diethyl-2-methyl-3-hydroxysuccinate                             | [M+H] <sup>+</sup>  | C9H16O5    | 205.10637                         |                    |                        | 9.0E+04                | 3.3                    |                        |                        |         |
| 497 | Isocaryophyllene                                                | [M+H] <sup>+</sup>  | C15H24     | 205.19510                         |                    |                        | 8.8E+04                | -0.1                   | 4.5E+05                | -4.6                   |         |
| 498 | Homocysteinesulfinic acid                                       | [M+K] <sup>+</sup>  | C4H9NO4S   | 205.98839                         | 8.9E+04            | 2.5                    |                        |                        |                        |                        |         |
| 499 | Nalpha,Nalpha-Dimethyl-histidine                                | [M+Na] <sup>+</sup> | C8H13N3O2  | 206.08927                         |                    |                        |                        | 2.4E+05                | 3.5                    |                        |         |
| 500 | 2-Acetamido-2,6-dideoxy-D-galactose                             | [M+H] <sup>+</sup>  | C8H15NO5   | 206.10230                         | 8.1E+04            | -2.1                   |                        |                        |                        |                        |         |
| 501 | Pantothenol                                                     | [M+H] <sup>+</sup>  | C9H19NO4   | 206.13801                         |                    |                        | 8.2E+04                | 3.3                    |                        |                        |         |
| 502 | Diaminosalicylic acid                                           | [M+K] <sup>+</sup>  | C7H8N2O3   | 207.01665                         | 1.1E+06            | 4.3                    |                        | 1.8E+06                | -4.6                   |                        |         |
| 503 | N-Cyclopropylammelide                                           | [M+K] <sup>+</sup>  | C6H8N4O2   | 207.02788                         | 2.5E+05            | 2.6                    |                        |                        |                        |                        |         |
| 504 | Homocitric acid                                                 | [M+H] <sup>+</sup>  | C7H10O7    | 207.05035                         |                    |                        | 1.2E+05                | -2.0                   |                        |                        |         |
| 505 | Lipoic acid                                                     | [M+H] <sup>+</sup>  | C8H14O2S2  | 207.05035                         |                    |                        | 1.2E+05                | 2.2                    |                        |                        |         |
| 506 | Phosphorylcholine                                               | [M+Na] <sup>+</sup> | C5H15NO4P  | 207.06320                         |                    |                        |                        |                        |                        | 1.7E+05                | -0.5    |
| 507 | Geranic acid                                                    | [M+K] <sup>+</sup>  | C10H16O2   | 207.07819                         | 2.3E+05            | 0.0                    |                        |                        |                        |                        |         |
| 508 | Withasomnine                                                    | [M+Na] <sup>+</sup> | C12H12N2   | 207.08864                         |                    |                        |                        |                        |                        | 6.5E+04                | 3.0     |
| 509 | 5-exo-Hydroxy-1,2-campholide                                    | [M+Na] <sup>+</sup> | C10H16O3   | 207.09882                         |                    |                        | 1.6E+05                | 1.7                    |                        | 2.3E+05                | 2.5     |
| 510 | Methoxycinnamic acid ethyl ester                                | [M+H] <sup>+</sup>  | C12H14O3   | 207.10150                         |                    |                        |                        | 2.6E+06                | 0.3                    |                        | 4.7E+04 |
| 511 | Citronellyl formate                                             | [M+Na] <sup>+</sup> | C11H20O2   | 207.13555                         |                    |                        |                        |                        |                        | 1.6E+05                | 0.0     |
| 512 | 11-dodecen-1-ol                                                 | [M+Na] <sup>+</sup> | C12H24O    | 207.17258                         |                    |                        | 1.2E+05                | -3.1                   |                        |                        |         |
| 513 | Octylphenol                                                     | [M+H] <sup>+</sup>  | C14H22O    | 207.17434                         | 9.8E+04            | 0.3                    |                        |                        |                        |                        |         |
| 514 | 2-Amino-3-carboxymuconate semialdehyde                          | [M+Na] <sup>+</sup> | C7H7NO5    | 208.02153                         |                    |                        |                        | 9.2E+04                | 0.5                    |                        |         |
| 515 | 2-Deoxy-2-dimethylamino-alpha-D-Glucose                         | [M+H] <sup>+</sup>  | C8H17NO5   | 208.11756                         |                    |                        |                        | 4.5E+04                | 1.9                    |                        |         |
| 516 | Phospho-D-glycerate                                             | [M+Na] <sup>+</sup> | C3H7O7P    | 208.98136                         |                    |                        |                        | 1.7E+05                | 3.8                    |                        |         |
| 517 | Fraxetin                                                        | [M+H] <sup>+</sup>  | C10H8O5    | 209.04500                         |                    |                        | 1.1E+05                | -2.6                   | 2.7E+05                | 1.3                    | 2.4E+05 |
|     |                                                                 |                     |            |                                   |                    |                        |                        |                        | -0.5                   | 1.7E+05                | 1.4     |

| # Putative Annotation <sup>a</sup>                         | Ion                 | Formula   | m/z <sub>Theo.</sub> <sup>b</sup> | R2020 <sup>c</sup> | ppm W2020 <sup>c</sup> | ppm B2020 <sup>c</sup> | ppm R2021 <sup>c</sup> | ppm W2021 <sup>c</sup> | ppm B2021 <sup>c</sup> | ppm               |
|------------------------------------------------------------|---------------------|-----------|-----------------------------------|--------------------|------------------------|------------------------|------------------------|------------------------|------------------------|-------------------|
| 518 cis-2-Carboxycyclohexyl-acetic acid                    | [M+Na] <sup>+</sup> | C9H14O4   | 209.07793                         |                    |                        |                        |                        | 3.1E+05                | 2.4                    |                   |
| 519 Benzylsuccinate                                        | [M+H] <sup>+</sup>  | C11H12O4  | 209.08009                         |                    |                        | 9.7E+06                | 3.6                    |                        |                        |                   |
| 520 Oxodecanoate                                           | [M+Na] <sup>+</sup> | C10H18O3  | 209.11481                         |                    |                        |                        |                        | 3.8E+05                | 0.0                    | 1.0E+05 1.4       |
| 521 Benzyl -2-methyl-3-hydroxybutanoate                    | [M+H] <sup>+</sup>  | C12H16O3  | 209.11706                         |                    | 1.3E+05                | 0.8                    |                        |                        |                        |                   |
| 522 Methyl-decanoic acid                                   | [M+Na] <sup>+</sup> | C11H22O2  | 209.15208                         |                    | 1.7E+05                | -4.2                   |                        |                        |                        |                   |
| 523 Heptyloxyphenol                                        | [M+H] <sup>+</sup>  | C13H20O2  | 209.15316                         |                    |                        |                        | 1.8E+05                | 2.1                    |                        | 9.6E+04 4.1       |
| 524 Ammodendrine                                           | [M+H] <sup>+</sup>  | C12H20N2O | 209.16484                         | 9.5E+04            | 0.0                    |                        |                        |                        |                        |                   |
| 525 2-(Acetamidomethylene)succinate                        | [M+Na] <sup>+</sup> | C7H9NO5   | 210.03721                         |                    |                        |                        | 7.3E+04                | 0.4                    |                        |                   |
| 526 Hydroxyiminostilbene                                   | [M+H] <sup>+</sup>  | C14H11NO  | 210.09099                         |                    |                        |                        |                        |                        | 4.7E+04                | 1.7               |
| 527 8-Amino-7-oxononanoic acid                             | [M+Na] <sup>+</sup> | C9H17NO3  | 210.10935                         |                    | 6.0E+05                | 3.4                    |                        |                        |                        |                   |
| 528 Decanamide                                             | [M+K] <sup>+</sup>  | C10H21NO  | 210.12611                         |                    |                        |                        |                        | 4.8E+04                | -3.0                   |                   |
| 529 Hydantoin-propionate                                   | [M+K] <sup>+</sup>  | C6H8N2O4  | 211.01157                         | 8.0E+04            | 1.2                    |                        | 3.5E+05                | -0.4                   | 2.5E+05                | -2.8 3.5E+05 -0.7 |
| 530 Glucaric acid                                          | [M+H] <sup>+</sup>  | C6H10O8   | 211.04484                         | 9.1E+04            | 2.2                    |                        |                        |                        |                        |                   |
| 531 Glycylproline                                          | [M+K] <sup>+</sup>  | C7H12N2O3 | 211.04894                         |                    |                        |                        | 1.6E+05                | -4.7                   |                        |                   |
| 532 Sedoheptulose                                          | [M+H] <sup>+</sup>  | C7H14O7   | 211.08185                         |                    |                        |                        |                        | 1.5E+05                | -2.9                   |                   |
| 533 1,3,7-Trimethyluric acid                               | [M+H] <sup>+</sup>  | C8H10N4O3 | 211.08312                         |                    |                        |                        | 8.2E+04                | -2.6                   |                        |                   |
| 534 Azelaic acid                                           | [M+Na] <sup>+</sup> | C9H16O4   | 211.09408                         | 1.5E+05            | -1.6                   | 4.1E+05 -0.3           | 2.4E+05                | -1.2                   | 5.8E+05                | -0.8 1.6E+05 -1.3 |
| 535 Acetylglutamine                                        | [M+K] <sup>+</sup>  | C7H16N4O  | 211.09569                         |                    |                        | 5.2E+06 -0.6           |                        |                        |                        |                   |
| 536 Jasmonic acid                                          | [M+H] <sup>+</sup>  | C12H18O3  | 211.13220                         |                    |                        |                        |                        | 2.0E+05                | 3.2                    |                   |
| 537 Undecanol                                              | [M+K] <sup>+</sup>  | C11H24O   | 211.14578                         |                    |                        |                        |                        | 7.8E+04                | 0.5                    |                   |
| 538 Aminobenzenesulfonate                                  | [M+K] <sup>+</sup>  | C6H7NO3S  | 211.97722                         |                    |                        |                        |                        |                        | 4.9E+04                | 2.8               |
| 539 Quinaldinic acid                                       | [M+K] <sup>+</sup>  | C10H7NO2  | 212.01102                         |                    |                        |                        |                        |                        | 7.2E+04                | -0.9              |
| 540 N-Acetyl-L-glutamate                                   | [M+Na] <sup>+</sup> | C7H11NO5  | 212.05294                         |                    |                        |                        | 4.8E+04                | 0.0                    |                        |                   |
| 541 Menadiol                                               | [M+K] <sup>+</sup>  | C11H10O2  | 213.03169                         |                    |                        |                        |                        | 6.4E+04                | -2.1                   |                   |
| 542 N-Carbamyl-L-glutamate                                 | [M+Na] <sup>+</sup> | C6H10N2O5 | 213.04914                         |                    |                        |                        |                        |                        | 5.7E+04                | -4.4              |
| 543 N-Acetylornithine                                      | [M+K] <sup>+</sup>  | C7H14N2O3 | 213.06450                         |                    |                        |                        | 6.2E+04                | -4.2                   |                        | 1.7E+05 -1.7      |
| 544 Arginine                                               | [M+K] <sup>+</sup>  | C6H14N4O2 | 213.07484                         | 2.0E+05            | 0.4                    |                        |                        | 1.1E+05                | 2.1                    |                   |
| 545 Propyl gallate                                         | [M+H] <sup>+</sup>  | C10H12O5  | 213.07543                         |                    |                        | 9.3E+05                | 1.5                    |                        |                        |                   |
| 546 Arginine                                               | [M+K] <sup>+</sup>  | C6H14N4O2 | 213.07576                         |                    |                        |                        |                        |                        | 7.8E+04                | -4.3              |
| 547 Pinosylvin                                             | [M+H] <sup>+</sup>  | C14H12O2  | 213.09101                         | 9.7E+04            | -3.6                   |                        |                        |                        |                        |                   |
| 548 Perseitol                                              | [M+H] <sup>+</sup>  | C7H16O7   | 213.09696                         |                    |                        |                        |                        | 6.1E+04                | -0.4                   |                   |
| 549 p-Cumylphenol                                          | [M+H] <sup>+</sup>  | C15H16O   | 213.12697                         |                    |                        |                        | 4.0E+04                | 2.0                    |                        |                   |
| 550 Citric acid                                            | [M+Na] <sup>+</sup> | C6H8O7    | 215.01622                         | 2.4E+05            | -0.4                   |                        |                        |                        |                        |                   |
| 551 Dinitroguaiacol                                        | [M+H] <sup>+</sup>  | C7H6N2O6  | 215.03066                         |                    |                        |                        |                        | 8.2E+04                | -3.7                   |                   |
| 552 2-Deoxy-D-ribose 1-phosphate                           | [M+H] <sup>+</sup>  | C5H11O7P  | 215.03066                         |                    |                        |                        |                        | 8.2E+04                | 4.0                    |                   |
| 553 Amino-3-(3-carboxy-5-methyl-4-isoxazolyl)porionic acid | [M+H] <sup>+</sup>  | C8H10N2O5 | 215.06656                         |                    |                        |                        |                        | 9.0E+04                | -1.5                   |                   |
| 554 Methyl 2-diazoacetamidohexonate                        | [M+H] <sup>+</sup>  | C9H16N3O3 | 215.12644                         | 1.9E+05            | -1.3                   |                        |                        | 2.4E+05                | 3.8                    | 2.3E+05 4.6       |
| 555 N-Formyl-L-methionine                                  | [M+K] <sup>+</sup>  | C6H11NO3S | 216.00912                         | 1.2E+06            | 2.0                    |                        |                        |                        |                        |                   |
| 556 Alliin                                                 | [M+K] <sup>+</sup>  | C6H11NO3S | 216.00912                         | 1.2E+06            | 2.0                    |                        |                        |                        |                        |                   |

| # Putative Annotation <sup>a</sup>                    | Ion                 | Formula    | m/z <sub>Theo.</sub> <sup>b</sup> | R2020 <sup>c</sup> | ppm W2020 <sup>c</sup> | ppm B2020 <sup>c</sup> | ppm R2021 <sup>c</sup> | ppm W2021 <sup>c</sup> | ppm B2021 <sup>c</sup> | ppm  |
|-------------------------------------------------------|---------------------|------------|-----------------------------------|--------------------|------------------------|------------------------|------------------------|------------------------|------------------------|------|
| 557 S-(1-propenyl)-L-cysteine sulfoxide               | [M+K] <sup>+</sup>  | C6H11NO3S  | 216.00912                         | 1.2E+06            | 2.0                    |                        |                        |                        |                        |      |
| 558 Methyl beta-D-galactoside                         | [M+Na] <sup>+</sup> | C7H14O6    | 217.06840                         |                    |                        | 1.3E+05                | -0.7                   |                        |                        |      |
| 559 Hydroxynicotine                                   | [M+K] <sup>+</sup>  | C10H14N2O  | 217.07377                         | 1.4E+05            | 0.5                    |                        |                        |                        |                        |      |
| 560 Tetradecadiene-diyonic acid                       | [M+H] <sup>+</sup>  | C14H16O2   | 217.12321                         |                    |                        | 8.2E+05                | -4.2                   |                        |                        |      |
| 561 Undecanedioic acid                                | [M+H] <sup>+</sup>  | C11H20O4   | 217.14346                         |                    |                        |                        | 7.3E+04                | -0.1                   |                        |      |
| 562 Isoxanthopterin                                   | [M+K] <sup>+</sup>  | C6H5N5O2   | 218.00748                         | 1.4E+05            | -1.5                   |                        |                        |                        |                        |      |
| 563 Cyclohexylsulfamate                               | [M+K] <sup>+</sup>  | C6H13NO3S  | 218.02388                         |                    |                        | 1.2E+05                | 4.1                    |                        |                        |      |
| 564 Pyridarone                                        | [M+Na] <sup>+</sup> | C13H9NO    | 218.05783                         |                    |                        |                        |                        |                        | 3.7E+04                | -0.9 |
| 565 L-Homophenylalanine                               | [M+K] <sup>+</sup>  | C10H13NO2  | 218.05783                         |                    |                        |                        |                        |                        | 3.7E+04                | -0.2 |
| 566 2-(Hydroxymethyl)-3-(acetamidomethylene)succinate | [M+H] <sup>+</sup>  | C8H11NO6   | 218.06677                         |                    |                        |                        |                        | 7.7E+04                | -3.9                   |      |
| 567 Tyrosine methyl ester                             | [M+Na] <sup>+</sup> | C10H13NO3  | 218.07920                         |                    |                        |                        |                        | 1.7E+05                | -2.0                   |      |
| 568 3-Methylindolepyruvate                            | [M+H] <sup>+</sup>  | C12H11NO3  | 218.08101                         |                    |                        |                        |                        |                        | 3.9E+04                | 0.7  |
| 569 Sulfosalicylic acid                               | [M+H] <sup>+</sup>  | C7H6O6S    | 218.99632                         |                    |                        | 1.5E+05                | -2.4                   |                        |                        |      |
| 570 Caffeic acid                                      | [M+K] <sup>+</sup>  | C9H8O4     | 219.00542                         | 3.1E+05            | 1.7                    |                        |                        |                        | 4.0E+04                | 4.2  |
| 571 Isonicotinylglycine                               | [M+K] <sup>+</sup>  | C8H8N2O3   | 219.01583                         |                    |                        |                        | 1.0E+05                | 3.8                    |                        |      |
| 572 Glucose                                           | [M+K] <sup>+</sup>  | C6H12O6    | 219.02655                         | 1.4E+06            | 4.3                    | 2.2E+06                | -0.4                   |                        | 5.2E+05                | -0.6 |
| 573 Aminophenylalanine                                | [M+K] <sup>+</sup>  | C9H12N2O2  | 219.05372                         |                    |                        |                        |                        | 1.4E+05                | -3.1                   |      |
| 574 1,2,3-triacetyl-glycerol                          | [M+H] <sup>+</sup>  | C9H14O6    | 219.08556                         |                    |                        |                        | 5.0E+04                | 3.4                    |                        |      |
| 575 5-L-Glutamyl-L-alanine                            | [M+H] <sup>+</sup>  | C8H14N2O5  | 219.09670                         |                    |                        |                        |                        |                        | 7.0E+04                | 3.9  |
| 576 Geranyl acetate                                   | [M+Na] <sup>+</sup> | C12H20O2   | 219.13470                         |                    |                        |                        |                        | 1.6E+05                | 3.9                    |      |
| 577 Tetradecapentaenoic acid                          | [M+H] <sup>+</sup>  | C14H18O2   | 219.13733                         |                    |                        |                        | 8.0E+04                | 2.9                    |                        |      |
| 578 Guanidinoethyl methyl phosphate                   | [M+Na] <sup>+</sup> | C4H12N3O4P | 220.04626                         |                    |                        |                        | 4.4E+04                | -2.3                   |                        |      |
| 579 N-Hydroxy-L-tyrosine                              | [M+Na] <sup>+</sup> | C9H11NO4   | 220.05863                         |                    |                        |                        | 3.6E+04                | -2.7                   |                        |      |
| 580 Amidino-3-keto-scylo-inosamine                    | [M+H] <sup>+</sup>  | C7H13N3O5  | 220.09348                         |                    |                        |                        |                        |                        | 4.0E+04                | -3.1 |
| 581 Succimer                                          | [M+K] <sup>+</sup>  | C4H6O4S2   | 220.93457                         |                    |                        |                        |                        | 9.2E+05                | -3.0                   |      |
| 582 Dihydrocaffeic acid                               | [M+K] <sup>+</sup>  | C9H10O4    | 221.02107                         | 2.7E+05            | 1.9                    | 2.2E+05                | -3.5                   |                        | 1.7E+05                | 1.5  |
| 583 Imidazole acetol-phosphate                        | [M+H] <sup>+</sup>  | C6H9N2O5P  | 221.03218                         | 7.5E+05            | 3.1                    | 3.2E+05                | -2.3                   |                        | 3.7E+05                | -4.1 |
| 584 Diisopropyl phosphate                             | [M+K] <sup>+</sup>  | C6H15O4P   | 221.03340                         |                    |                        |                        |                        |                        | 1.9E+05                | 2.5  |
| 585 Purpurogallin                                     | [M+H] <sup>+</sup>  | C11H8O5    | 221.04445                         | 3.5E+05            | 2.0                    |                        |                        |                        |                        |      |
| 586 N-Nitrosodiphenylamine                            | [M+Na] <sup>+</sup> | C12H10N2O  | 221.06758                         |                    |                        |                        |                        |                        | 7.0E+04                | 4.3  |
| 587 cis-2,3-Dihydroxy-2,3-dihydro-p-cumate            | [M+Na] <sup>+</sup> | C10H14O4   | 221.07891                         |                    |                        |                        |                        |                        | 3.6E+04                | -2.2 |
| 588 N-Acetyl-beta-D-glucosaminylamine                 | [M+H] <sup>+</sup>  | C8H16N2O5  | 221.11348                         |                    |                        |                        |                        | 1.3E+05                | -1.3                   |      |
| 589 Linderic acid                                     | [M+Na] <sup>+</sup> | C12H22O2   | 221.15120                         | 1.7E+05            | 2.7                    | 1.9E+05                | -3.4                   |                        |                        |      |
| 590 Caryophyllene epoxide                             | [M+H] <sup>+</sup>  | C15H24O    | 221.19020                         |                    |                        |                        | 5.2E+05                | -0.9                   |                        |      |
| 591 p-Hydroxyphenylacetothiohydroximate               | [M+K] <sup>+</sup>  | C8H9NO2S   | 221.99879                         |                    |                        |                        | 4.2E+04                | -1.0                   |                        |      |
| 592 Pyridoxic acid                                    | [M+K] <sup>+</sup>  | C8H9NO4    | 222.01680                         |                    |                        | 7.8E+04                | -2.2                   |                        |                        |      |
| 593 Dictamnine                                        | [M+Na] <sup>+</sup> | C12H9NO2   | 222.05323                         |                    |                        |                        | 4.6E+04                | -3.1                   |                        |      |
| 594 3-(3,4-Dihydroxypyridin-1-yl)-L-alanine           | [M+Na] <sup>+</sup> | C8H11N2O4  | 222.06087                         |                    |                        |                        | 1.2E+05                | 1.0                    |                        |      |
| 595 Nalpha,Nalpha-Dimethyl-L-histidine                | [M+K] <sup>+</sup>  | C8H13N3O2  | 222.06397                         |                    |                        |                        | 3.6E+04                | -0.2                   |                        |      |

| # Putative Annotation <sup>a</sup>                       | Ion                 | Formula    | m/z <sub>Theo.</sub> <sup>b</sup> | R2020 <sup>c</sup> | ppm W2020 <sup>c</sup> | ppm B2020 <sup>c</sup> | ppm R2021 <sup>c</sup> | ppm W2021 <sup>c</sup> | ppm B2021 <sup>c</sup> | ppm          |
|----------------------------------------------------------|---------------------|------------|-----------------------------------|--------------------|------------------------|------------------------|------------------------|------------------------|------------------------|--------------|
| 596 Erythrose 4-phosphate                                | [M+Na] <sup>+</sup> | C4H9O7P    | 222.99879                         |                    |                        |                        |                        | 6.7E+04                | -4.4                   |              |
| 597 3-(3'-Methylthio)propylmalic acid                    | [M+H] <sup>+</sup>  | C8H14O5S   | 223.06347                         | 1.0E+05            | -3.9                   |                        |                        |                        |                        |              |
| 598 Decenedioic acid                                     | [M+Na] <sup>+</sup> | C10H16O4   | 223.09408                         | 1.4E+05            | -2.8                   |                        |                        | 7.4E+05                | -0.9                   | 2.4E+05 -2.4 |
| 599 Apiole                                               | [M+H] <sup>+</sup>  | C12H14O4   | 223.09572                         |                    | 5.6E+05                | 3.4                    | 7.4E+06                | 3.4                    | 3.7E+05                | 2.0          |
| 600 Lauric acid                                          | [M+Na] <sup>+</sup> | C12H24O2   | 223.16685                         | 6.1E+04            | 3.7                    |                        |                        |                        |                        |              |
| 601 Capryloylglycine                                     | [M+Na] <sup>+</sup> | C10H19NO3  | 224.12669                         |                    |                        |                        |                        |                        | 4.0E+04                | -4.4         |
| 602 Sulfolobenzaldehyde                                  | [M+K] <sup>+</sup>  | C7H6O4S    | 224.96247                         |                    |                        |                        | 2.1E+05                | -2.8                   |                        |              |
| 603 Bergaptol                                            | [M+Na] <sup>+</sup> | C11H6O4    | 225.01539                         |                    |                        |                        | 1.6E+05                | 2.0                    |                        |              |
| 604 Dimethoxy-4-hydroxycinnamic acid                     | [M+H] <sup>+</sup>  | C11H12O5   | 225.07671                         |                    |                        |                        |                        |                        | 1.3E+05                | -4.3         |
| 605 3-Hydroxykynurenine                                  | [M+H] <sup>+</sup>  | C10H12N2O4 | 225.08643                         |                    |                        |                        | 9.6E+04                | 2.5                    |                        |              |
| 606 Sebacic acid                                         | [M+Na] <sup>+</sup> | C10H18O4   | 225.10973                         | 1.2E+05            | 2.4                    | 2.8E+05                | -3.7                   | 1.9E+05                | -2.6                   | 5.4E+05 -0.1 |
| 607 2-Amino-1-methyl-6-phenylimidazo[4,5-b]pyridine      | [M+H] <sup>+</sup>  | C13H12N4   | 225.11253                         |                    |                        |                        | 3.7E+06                | 4.2                    |                        |              |
| 608 4-Amino-4-deoxychorismate;ADC                        | [M+H] <sup>+</sup>  | C10H11NO5  | 226.07028                         |                    |                        |                        | 3.9E+04                | 3.2                    |                        |              |
| 609 N-Heptanoylglycine                                   | [M+K] <sup>+</sup>  | C9H17NO3   | 226.08416                         |                    | 1.0E+05                | -0.7                   |                        |                        |                        |              |
| 610 L-beta-aspartyl-L-alanine                            | [M+Na] <sup>+</sup> | C7H12N2O5  | 227.06477                         |                    | 1.0E+05                | -4.1                   |                        |                        |                        |              |
| 611 Dimethylenetriurea                                   | [M+Na] <sup>+</sup> | C5H12N6O3  | 227.08681                         |                    | 1.5E+05                | -2.2                   |                        |                        |                        |              |
| 612 Genipin                                              | [M+H] <sup>+</sup>  | C11H14O5   | 227.09077                         |                    |                        |                        | 1.8E+06                | 2.8                    |                        |              |
| 613 O-Acetylcarnitine                                    | [M+Na] <sup>+</sup> | C9H18NO4   | 227.11221                         |                    |                        |                        | 5.9E+04                | 2.6                    |                        |              |
| 614 Tuberonic acid                                       | [M+H] <sup>+</sup>  | C12H18O4   | 227.12779                         | 2.5E+05            | -2.4                   |                        |                        |                        |                        |              |
| 615 1,8-Diazacyclotetradecane-2,9-dione                  | [M+H] <sup>+</sup>  | C12H22N2O2 | 227.17588                         |                    |                        |                        |                        |                        | 3.7E+04                | -2.1         |
| 616 S-Prenyl-L-cysteine                                  | [M+K] <sup>+</sup>  | C8H15NO2S  | 228.04576                         |                    |                        |                        |                        |                        | 5.5E+04                | -1.1         |
| 617 1-Methyl-4-phenyl-1,2,3,6-tetrahydropyridine N-oxide | [M+K] <sup>+</sup>  | C12H15NO   | 228.07950                         |                    |                        |                        | 1.2E+05                | -4.3                   |                        |              |
| 618 Methylthiooctanaldoxime                              | [M+K] <sup>+</sup>  | C9H19NOS   | 228.08174                         |                    | 7.9E+04                | 0.7                    |                        | 6.0E+04                | -0.3                   |              |
| 619 Deoxycytidine                                        | [M+H] <sup>+</sup>  | C9H13N3O4  | 228.09693                         |                    |                        |                        |                        |                        | 4.5E+04                | 4.2          |
| 620 Oxalosuccinic acid                                   | [M+K] <sup>+</sup>  | C6H6O7     | 228.97532                         |                    |                        |                        |                        | 4.8E+04                | -3.5                   |              |
| 621 4-Nitroquinoline N-oxide                             | [M+K] <sup>+</sup>  | C9H6N2O3   | 229.00041                         |                    |                        |                        | 5.1E+04                | 2.6                    |                        |              |
| 622 Serine phosphoethanolamine                           | [M+H] <sup>+</sup>  | C5H13N2O6P | 229.05879                         |                    |                        |                        | 2.6E+05                | -1.7                   |                        |              |
| 623 Resveratrol                                          | [M+H] <sup>+</sup>  | C14H12O3   | 229.08655                         |                    | 1.4E+05                | -2.7                   |                        |                        |                        |              |
| 624 trans,trans-1,4-Diphenyl-1,3-butadiene               | [M+Na] <sup>+</sup> | C16H14     | 229.09877                         | 1.0E+05            | -0.9                   |                        |                        |                        |                        |              |
| 625 Monoethylglycinexylidide                             | [M+Na] <sup>+</sup> | C12H18N2O  | 229.13128                         |                    |                        |                        | 1.7E+05                | -0.6                   |                        |              |
| 626 Dodecenedioic acid                                   | [M+H] <sup>+</sup>  | C12H20O4   | 229.14350                         |                    |                        |                        |                        |                        | 5.5E+04                | -0.3         |
| 627 L-isoleucyl-L-proline                                | [M+H] <sup>+</sup>  | C11H20N2O3 | 229.15515                         |                    | 8.8E+04                | -2.1                   |                        |                        |                        |              |
| 628 Octylphenol                                          | [M+Na] <sup>+</sup> | C14H22O    | 229.15629                         | 1.2E+05            | 2.0                    |                        |                        |                        |                        |              |
| 629 N-Acetyl-L-methionine                                | [M+K] <sup>+</sup>  | C7H13NO3S  | 230.02431                         |                    |                        |                        |                        |                        | 3.7E+04                | 2.0          |
| 630 S-(2-Hydroxyethyl)-N-acetyl-L-cysteine               | [M+Na] <sup>+</sup> | C7H13NO4S  | 230.04546                         |                    |                        |                        | 1.0E+05                | 1.3                    |                        |              |
| 631 Dihydroliipoamide                                    | [M+Na] <sup>+</sup> | C8H17NOS2  | 230.06377                         |                    | 1.4E+05                | 2.6                    |                        |                        |                        |              |
| 632 Hydroxydebrisoquine                                  | [M+K] <sup>+</sup>  | C10H13N3O  | 230.06838                         |                    |                        |                        |                        | 5.7E+04                | 2.8                    |              |
| 633 Anthocyanin                                          | [M+Na] <sup>+</sup> | C15H11O    | 230.07021                         |                    |                        |                        | 5.4E+04                | 0.0                    |                        |              |

| # Putative Annotation <sup>a</sup>                  | Ion                  | Formula    | m/z <sub>Theo.</sub> <sup>b</sup> | R2020 <sup>c</sup> | ppm W2020 <sup>c</sup> | ppm B2020 <sup>c</sup> | ppm R2021 <sup>c</sup> | ppm W2021 <sup>c</sup> | ppm B2021 <sup>c</sup> | ppm              |
|-----------------------------------------------------|----------------------|------------|-----------------------------------|--------------------|------------------------|------------------------|------------------------|------------------------|------------------------|------------------|
| 634 N-Acetyl-D-phenylalanine                        | [M+Na] <sup>+</sup>  | C11H13NO3  | 230.07810                         |                    |                        |                        |                        |                        | 5.6E+04                | 2.9              |
| 635 N-Butyl-1H-pyrazolo[3,4-d]pyrimidin-4-amine     | [M+K] <sup>+</sup>   | C9H13N5    | 230.08027                         |                    |                        |                        |                        | 6.1E+04                | -0.1                   |                  |
| 636 Butenylcarnitine                                | [M+H] <sup>+</sup>   | C11H19NO4  | 230.13938                         |                    |                        |                        | 1.8E+05                | -3.0                   | 1.9E+05                | 3.2 2.3E+05 -3.9 |
| 637 Decanoylglycine                                 | [M+H] <sup>+</sup>   | C12H23NO3  | 230.17507                         | 3.4E+05            | 0.1                    |                        |                        |                        | 8.8E+04                | -1.2             |
| 638 Xestostanol C                                   | [M+H] <sup>+</sup>   | C14H31NO   | 230.24784                         | 1.2E+05            | -3.1                   |                        | 3.9E+05                | -1.3                   | 4.2E+05                | 1.3 1.2E+05 -1.1 |
| 639 Citric acid                                     | [M+K] <sup>+</sup>   | C6H8O7     | 230.99016                         | 2.9E+05            | -1.7                   |                        |                        |                        |                        |                  |
| 640 Myristicin                                      | [M+K] <sup>+</sup>   | C11H12O3   | 231.04087                         |                    |                        | 1.9E+05                | 4.0                    |                        |                        |                  |
| 641 Chalcone                                        | [M+Na] <sup>+</sup>  | C15H12O    | 231.07834                         |                    |                        |                        | 9.1E+04                | -1.3                   |                        |                  |
| 642 12-oxo-5E,8E,10Z-dodecatricienoic acid          | [M+Na] <sup>+</sup>  | C12H16O3   | 231.09917                         | 1.6E+05            | 3.2                    |                        |                        |                        |                        |                  |
| 643 Diphenylcyclobutane                             | [M+Na] <sup>+</sup>  | C16H16     | 231.11442                         | 9.7E+04            | -1.1                   |                        |                        |                        |                        |                  |
| 644 Linderenol                                      | [M+H] <sup>+</sup>   | C15H18O2   | 231.13724                         |                    |                        |                        |                        | 1.4E+05                | 3.1                    |                  |
| 645 Dodecanedioic acid                              | [M+H] <sup>+</sup>   | C12H22O4   | 231.15878                         |                    |                        |                        | 4.0E+04                | 1.3                    |                        |                  |
| 646 Hydroxy-tridecanoic acid                        | [M+H] <sup>+</sup>   | C13H26O3   | 231.19636                         |                    |                        | 1.3E+05                | -3.8                   |                        |                        |                  |
| 647 Hydroxypseudoxyntocine                          | [M+K] <sup>+</sup>   | C10H14N2O2 | 233.06801                         |                    |                        |                        |                        |                        | 6.4E+04                | 2.9              |
| 648 Dihydrochalcone                                 | [M+Na] <sup>+</sup>  | C15H14O    | 233.09416                         |                    |                        |                        | 9.2E+04                | -2.0                   |                        |                  |
| 649 Apotaxene                                       | [M+H] <sup>+</sup>   | C17H28     | 233.22686                         |                    |                        | 2.5E+05                | -2.1                   |                        |                        |                  |
| 650 Hydroxypropionylcarnitine                       | [M+H] <sup>+</sup>   | C10H19NO5  | 234.13401                         |                    | 1.1E+05                | -1.8                   |                        |                        |                        |                  |
| 651 Deoxynupharidine                                | [M+H] <sup>+</sup>   | C15H23NO   | 234.18470                         |                    |                        |                        |                        | 9.6E+04                | 2.3                    |                  |
| 652 (Homo)3-citrate                                 | [M+H] <sup>+</sup>   | C9H14O7    | 235.08202                         |                    |                        |                        |                        | 8.7E+05                | -3.4                   |                  |
| 653 Harmine                                         | [M+Na] <sup>+</sup>  | C13H12N2O  | 235.08483                         |                    |                        |                        | 8.0E+05                | -2.8                   |                        |                  |
| 654 Acetoxychavicol acetate                         | [M+H] <sup>+</sup>   | C13H14O4   | 235.09678                         |                    |                        |                        |                        |                        | 3.4E+05                | -1.3             |
| 655 3,7-Dimethyl-8,11-dioxo-2E,6E,9E-dodecatricenal | [M+H] <sup>+</sup>   | C14H18O3   | 235.13261                         |                    |                        | 3.5E+06                | 1.1                    |                        |                        |                  |
| 656 2-methyl-2-dodecenoic acid                      | [M+Na] <sup>+</sup>  | C13H24O2   | 235.16668                         |                    | 2.1E+05                | 0.7                    |                        |                        |                        |                  |
| 657 2-methyl-2-dodecenoic acid                      | [M+Na] <sup>+</sup>  | C13H24O2   | 235.16685                         | 1.5E+05            | 2.8                    |                        |                        |                        |                        |                  |
| 658 Myristaldehyde                                  | [M+Na] <sup>+</sup>  | C14H28O    | 235.20403                         |                    | 2.4E+05                | -3.4                   |                        |                        |                        |                  |
| 659 Hexadecatrienal                                 | [M+H] <sup>+</sup>   | C16H26O    | 235.20564                         | 2.4E+05            | -0.6                   |                        |                        |                        |                        |                  |
| 660 Benzenedisulfonamide                            | [M+H] <sup>+</sup>   | C6H8N2O4S2 | 236.99893                         |                    |                        | 1.1E+06                | 3.8                    |                        |                        |                  |
| 661 Capillarin                                      | [M+K] <sup>+</sup>   | C13H10O2   | 237.03124                         | 1.4E+05            | 3.2                    |                        |                        |                        |                        |                  |
| 662 Trimethoxycoumarin                              | [M+H] <sup>+</sup>   | C12H12O5   | 237.07498                         |                    | 1.3E+06                | 3.2                    |                        |                        |                        |                  |
| 663 Trimethoxycoumarin                              | [M+H] <sup>+</sup>   | C12H12O5   | 237.07575                         | 2.3E+05            | -0.2                   |                        |                        |                        |                        |                  |
| 664 N-(Phenylmethyl)-N-methyl-2-pyridinamine        | [M+K] <sup>+</sup>   | C13H14N2   | 237.07828                         |                    |                        |                        | 6.0E+04                | 2.4                    |                        | 4.5E+04 4.2      |
| 665 Coryneine                                       | [M+K41] <sup>+</sup> | C11H18NO2  | 237.09452                         |                    |                        |                        |                        |                        |                        | 4.1E+04 2.2      |
| 666 Dimethylallyl-hydroxymandelic acid              | [M+H] <sup>+</sup>   | C13H16O4   | 237.11171                         |                    |                        | 9.6E+06                | 1.8                    | 1.5E+05                | 0.3                    |                  |
| 667 Heptyloxybenzoic acid                           | [M+H] <sup>+</sup>   | C14H20O3   | 237.14754                         |                    |                        |                        |                        |                        |                        | 8.1E+04 4.1      |
| 668 Capsidiol                                       | [M+H] <sup>+</sup>   | C15H24O2   | 237.18476                         |                    |                        |                        |                        |                        |                        | 4.6E+04 0.6      |
| 669 Hexadecynal                                     | [M+H] <sup>+</sup>   | C16H28O    | 237.22129                         | 9.0E+04            | -0.1                   |                        |                        |                        |                        |                  |
| 670 N-Nonanoylglycine                               | [M+Na] <sup>+</sup>  | C11H21NO3  | 238.14136                         | 6.6E+04            | 1.6                    |                        | 6.1E+04                | 1.9                    |                        |                  |
| 671 Trimethylallantoin                              | [M+K] <sup>+</sup>   | C7H12N4O3  | 239.05410                         | 7.4E+04            | 3.7                    |                        |                        |                        |                        |                  |
| 672 Decenedioic acid                                | [M+K] <sup>+</sup>   | C10H16O4   | 239.06832                         |                    | 8.4E+04                | -1.3                   |                        |                        |                        |                  |

| # Putative Annotation <sup>a</sup>                    | Ion                 | Formula    | m/z <sub>Theo.</sub> <sup>b</sup> | R2020 <sup>c</sup> | ppm W2020 <sup>c</sup> | ppm B2020 <sup>c</sup> | ppm R2021 <sup>c</sup> | ppm W2021 <sup>c</sup> | ppm B2021 <sup>c</sup> | ppm          |
|-------------------------------------------------------|---------------------|------------|-----------------------------------|--------------------|------------------------|------------------------|------------------------|------------------------|------------------------|--------------|
| 673 Flavonol                                          | [M+H] <sup>+</sup>  | C15H10O3   | 239.07027                         | 9.9E+04            | 2.9                    |                        |                        |                        |                        |              |
| 674 Trimethoxycinnamic acid                           | [M+H] <sup>+</sup>  | C12H14O5   | 239.09061                         |                    |                        | 6.1E+06                | 3.3                    |                        |                        |              |
| 675 Tetrahydrozoline                                  | [M+K] <sup>+</sup>  | C13H16N2   | 239.09451                         |                    |                        |                        |                        |                        | 1.0E+05                | 0.0          |
| 676 Methoxychalcone                                   | [M+H] <sup>+</sup>  | C16H14O2   | 239.10709                         |                    |                        | 1.3E+06                | -1.8                   |                        |                        |              |
| 677 7-hydroxy-dodecanoic acid                         | [M+Na] <sup>+</sup> | C12H24O3   | 239.16226                         |                    |                        |                        |                        |                        | 1.5E+05                | -2.1         |
| 678 Hydroxy lauric acid                               | [M+Na] <sup>+</sup> | C12H24O3   | 239.16270                         |                    |                        |                        |                        | 4.4E+05                | -3.9                   |              |
| 679 Sundiversifolide                                  | [M+H] <sup>+</sup>  | C14H22O3   | 239.16417                         | 1.2E+05            | -2.5                   | 1.9E+05                | 0.6                    | 1.2E+05                | -2.6                   |              |
| 680 2-(Acetamidomethylene)-3-(hydroxymethyl)succinate | [M+Na] <sup>+</sup> | C8H11NO6   | 240.04845                         |                    |                        |                        | 7.4E+04                | -2.5                   |                        |              |
| 681 Methylindolepyruvate                              | [M+Na] <sup>+</sup> | C12H11NO3  | 240.06313                         |                    |                        |                        | 6.4E+04                | -0.1                   | 3.6E+04                | -1.9         |
| 682 beta-Alanyl-L-lysine                              | [M+Na] <sup>+</sup> | C9H19N3O3  | 240.13128                         |                    |                        | 3.2E+05                | 2.4                    |                        |                        |              |
| 683 Amino-undecanoic acid                             | [M+K] <sup>+</sup>  | C11H23NO2  | 240.13648                         |                    |                        |                        |                        |                        | 3.6E+04                | -1.8         |
| 684 Bergaptol                                         | [M+K] <sup>+</sup>  | C11H6O4    | 240.99028                         |                    |                        |                        |                        |                        | 9.6E+04                | -2.1         |
| 685 Dihydroxyanthraquinone                            | [M+H] <sup>+</sup>  | C14H8O4    | 241.04923                         |                    | 9.4E+04                | 1.3                    |                        |                        |                        |              |
| 686 Sebacic acid                                      | [M+K] <sup>+</sup>  | C10H18O4   | 241.08367                         | 1.2E+05            | -1.0                   |                        |                        |                        |                        |              |
| 687 Hydroxysebacic acid                               | [M+Na] <sup>+</sup> | C10H18O5   | 241.10515                         |                    | 9.9E+04                | -2.1                   |                        | 1.6E+05                | -2.9                   |              |
| 688 Dimethyl-L-arginine                               | [M+K] <sup>+</sup>  | C8H18N4O2  | 241.10614                         | 2.4E+05            | -1.9                   | 2.1E+06                | -3.0                   |                        |                        |              |
| 689 O-Succinyl-L-homoserine                           | [M+Na] <sup>+</sup> | C8H13NO6   | 242.06448                         |                    |                        |                        |                        | 5.3E+04                | -4.0                   |              |
| 690 L-Acetylcarnitine                                 | [M+K] <sup>+</sup>  | C9H17NO4   | 242.07966                         |                    |                        |                        |                        | 7.4E+04                | -3.1                   |              |
| 691 N-Phenyl-1-naphthylamine                          | [M+Na] <sup>+</sup> | C16H13N    | 242.09370                         |                    |                        |                        |                        |                        | 4.9E+04                | 1.3          |
| 692 Pantothenic acid                                  | [M+Na] <sup>+</sup> | C9H17NO5   | 242.10015                         |                    | 1.1E+05                | -1.1                   |                        |                        |                        |              |
| 693 Pentahomomethionine                               | [M+Na] <sup>+</sup> | C10H21NO2S | 242.11783                         |                    |                        |                        |                        | 5.9E+04                | 2.9                    |              |
| 694 Diethyl-2-methyl-3-hydroxysuccinate               | [M+K] <sup>+</sup>  | C9H16O5    | 243.06386                         |                    |                        |                        |                        | 5.2E+04                | -3.8                   |              |
| 695 gamma-Hydroxy-L-homoarginine                      | [M+K] <sup>+</sup>  | C7H16N4O3  | 243.08463                         |                    |                        |                        | 4.8E+04                | 3.2                    |                        |              |
| 696 Caulophylline                                     | [M+K] <sup>+</sup>  | C12H16N2O  | 243.08945                         |                    |                        | 2.7E+05                | -0.1                   |                        |                        |              |
| 697 Lipoamide                                         | [M+K] <sup>+</sup>  | C8H15NOS2  | 244.02347                         |                    |                        |                        |                        |                        | 6.6E+04                | -3.3         |
| 698 Pantothenol                                       | [M+K] <sup>+</sup>  | C9H19NO4   | 244.09399                         |                    |                        |                        |                        | 1.1E+05                | 2.4                    |              |
| 699 N-Undecanoylglycine                               | [M+H] <sup>+</sup>  | C13H25NO3  | 244.19072                         | 1.4E+05            | -1.3                   | 1.8E+05                | -3.1                   |                        |                        |              |
| 700 2-amino-tetradecanoic acid                        | [M+H] <sup>+</sup>  | C14H29NO2  | 244.22720                         |                    |                        |                        |                        | 5.9E+04                | -0.4                   |              |
| 701 Sulfolactone                                      | [M+Na] <sup>+</sup> | C6H6O7S    | 244.97270                         |                    |                        |                        | 5.3E+04                | -0.2                   |                        |              |
| 702 6-Acetyl-D-glucose                                | [M+Na] <sup>+</sup> | C8H14O7    | 245.06332                         |                    |                        |                        |                        | 3.3E+05                | -0.6                   | 8.8E+04 -1.8 |
| 703 Apiole                                            | [M+Na] <sup>+</sup> | C12H14O4   | 245.07843                         | 5.5E+05            | 3.4                    | 7.1E+05                | -2.0                   | 1.2E+06                | 0.1                    | 3.2E+05 -2.1 |
| 704 Piceatannol                                       | [M+H] <sup>+</sup>  | C14H12O4   | 245.08143                         |                    |                        | 2.2E+05                | -2.4                   | 3.9E+05                | 1.7                    |              |
| 705 Osthol                                            | [M+H] <sup>+</sup>  | C15H16O3   | 245.11740                         |                    |                        | 3.6E+05                | -0.7                   |                        |                        |              |
| 706 Dodecatrienyl acetate                             | [M+Na] <sup>+</sup> | C14H22O2   | 245.15120                         | 9.5E+04            | -3.8                   |                        |                        |                        |                        |              |
| 707 6E,8E,12E-Hexadecatrien-10-ynoic acid             | [M+H] <sup>+</sup>  | C16H20O2   | 245.15435                         |                    |                        |                        |                        |                        | 4.6E+04                | -3.0         |
| 708 Kynurenine                                        | [M+K] <sup>+</sup>  | C10H12N2O3 | 247.04839                         |                    |                        |                        | 7.0E+04                | -1.8                   |                        |              |
| 709 2-Amino-1-methyl-6-phenylimidazo[4,5-b]pyridine   | [M+Na] <sup>+</sup> | C13H12N4   | 247.09514                         |                    |                        | 7.1E+05                | 1.1                    |                        |                        |              |
| 710 Methyl jasmonate                                  | [M+Na] <sup>+</sup> | C13H20O3   | 247.13047                         | 2.9E+05            | -2.5                   |                        |                        | 2.1E+05                | -2.2                   |              |



| #   | Putative Annotation <sup>a</sup>                                    | Ion                 | Formula    | m/z <sub>Theo.</sub> <sup>b</sup> | R2020 <sup>c</sup> | ppm W2020 <sup>c</sup> | ppm B2020 <sup>c</sup> | ppm R2021 <sup>c</sup> | ppm W2021 <sup>c</sup> | ppm B2021 <sup>c</sup> | ppm     |     |
|-----|---------------------------------------------------------------------|---------------------|------------|-----------------------------------|--------------------|------------------------|------------------------|------------------------|------------------------|------------------------|---------|-----|
| 711 | alpha-Santonin                                                      | [M+H] <sup>+</sup>  | C15H18O3   | 247.13315                         |                    |                        |                        |                        |                        | 5.3E+04                | -1.1    |     |
| 712 | Tetradecadienal                                                     | [M+K] <sup>+</sup>  | C14H24O    | 247.14587                         | 8.6E+04            | -1.7                   |                        |                        |                        |                        |         |     |
| 713 | Pentadecenal                                                        | [M+Na] <sup>+</sup> | C15H28O    | 247.20324                         | 8.2E+04            | -3.2                   |                        |                        |                        |                        |         |     |
| 714 | Proflavine                                                          | [M+K] <sup>+</sup>  | C13H11N3   | 248.05943                         |                    |                        |                        | 5.0E+04                | -3.9                   |                        |         |     |
| 715 | Lycopodine                                                          | [M+H] <sup>+</sup>  | C16H25NO   | 248.20063                         |                    |                        |                        | 4.2E+04                | 1.1                    |                        |         |     |
| 716 | Tryptanthrine                                                       | [M+H] <sup>+</sup>  | C15H8N2O2  | 249.06638                         |                    |                        |                        | 1.3E+05                | -2.1                   |                        |         |     |
| 717 | Dihydrochalcone                                                     | [M+K] <sup>+</sup>  | C15H14O    | 249.06762                         | 8.6E+04            | -1.2                   |                        |                        |                        |                        |         |     |
| 718 | Beta-aspartyl-aspartic acid                                         | [M+H] <sup>+</sup>  | C8H12N2O7  | 249.07103                         |                    |                        | 7.6E+05                | 2.8                    |                        |                        |         |     |
| 719 | Prenyl caffeate                                                     | [M+H] <sup>+</sup>  | C14H16O4   | 249.11157                         |                    |                        | 4.8E+06                | 2.3                    |                        |                        |         |     |
| 720 | Hydroxymelatonin                                                    | [M+H] <sup>+</sup>  | C13H16N2O3 | 249.12337                         | 1.1E+05            | -1.6                   |                        |                        |                        |                        |         |     |
| 721 | Canellal                                                            | [M+H] <sup>+</sup>  | C15H20O3   | 249.14852                         | 1.9E+05            | -3.1                   |                        |                        |                        |                        |         |     |
| 722 | Myristoleic acid                                                    | [M+Na] <sup>+</sup> | C14H26O2   | 249.18250                         | 8.3E+04            | -0.8                   | 2.7E+05                | -1.2                   |                        |                        |         |     |
| 723 | Hexadecadiynoic acid                                                | [M+H] <sup>+</sup>  | C16H24O2   | 249.18411                         |                    |                        |                        |                        |                        | 8.0E+04                | 3.2     |     |
| 724 | 5-(2'-Formylethyl)-4,6-dihydroxypicolinate                          | [M+K] <sup>+</sup>  | C9H9NO5    | 250.01066                         |                    |                        |                        |                        | 7.3E+04                | 2.3                    |         |     |
| 725 | 1-(4-Methoxyphenyl)-3-(4-morpholinyl)-1-propanone                   | [M+H] <sup>+</sup>  | C14H19NO3  | 250.14316                         |                    |                        |                        |                        | 9.4E+04                | 2.4                    |         |     |
| 726 | Serine-phosphoethanolamine                                          | [M+Na] <sup>+</sup> | C5H13N2O6P | 251.04026                         |                    |                        |                        |                        | 1.2E+05                | 0.3                    |         |     |
| 727 | Deoxyuridine                                                        | [M+Na] <sup>+</sup> | C9H12N2O5  | 251.06470                         |                    |                        |                        |                        |                        | 5.4E+04                | -3.4    |     |
| 728 | L-prolyl-L-proline                                                  | [M+K] <sup>+</sup>  | C10H16N2O3 | 251.07863                         |                    |                        |                        | 1.2E+05                | 2.5                    | 7.8E+04                | -2.3    |     |
| 729 | 3-(5'-Methylthio)pentylmalic acid                                   | [M+H] <sup>+</sup>  | C10H18O5S  | 251.09386                         |                    |                        |                        |                        |                        | 6.5E+04                | 3.6     |     |
| 730 | Ubiquinone Q1                                                       | [M+H] <sup>+</sup>  | C14H18O4   | 251.12791                         |                    |                        | 6.8E+06                | -0.5                   | 1.5E+05                | 2.4                    | 9.7E+04 | 3.8 |
| 731 | 2-methyl-2-dodecenoic acid                                          | [M+K] <sup>+</sup>  | C13H24O2   | 251.14108                         |                    |                        |                        |                        | 1.6E+05                | -1.2                   |         |     |
| 732 | 2-keto tridecanoic acid                                             | [M+Na] <sup>+</sup> | C13H24O3   | 251.16103                         |                    |                        |                        | 7.6E+04                | 2.9                    |                        |         |     |
| 733 | Arbusculin A                                                        | [M+H] <sup>+</sup>  | C15H22O3   | 251.16372                         |                    |                        |                        |                        | 2.0E+05                | 1.8                    | 6.2E+04 | 1.0 |
| 734 | Myristic acid                                                       | [M+Na] <sup>+</sup> | C14H28O2   | 251.19807                         |                    | 3.2E+05                | 0.3                    |                        |                        |                        |         |     |
| 735 | 4-Phospho-L-aspartate                                               | [M+K] <sup>+</sup>  | C4H8NO7P   | 251.96788                         |                    |                        |                        | 4.3E+04                | -3.5                   |                        |         |     |
| 736 | N-Decanoylglycine                                                   | [M+Na] <sup>+</sup> | C12H23NO3  | 252.15701                         | 4.9E+05            | -1.8                   |                        |                        | 6.1E+05                | -0.2                   |         |     |
| 737 | Dodecanedioic acid                                                  | [M+Na] <sup>+</sup> | C12H22O4   | 253.14126                         |                    |                        |                        | 1.5E+05                | -0.9                   |                        |         |     |
| 738 | Tetramethyl-undecan-1,10-diol                                       | [M+Na] <sup>+</sup> | C14H30O2   | 253.21307                         |                    | 1.8E+05                | 2.9                    |                        |                        |                        |         |     |
| 739 | 2,2,9,9-tetramethyl-undecan-1,10-diol                               | [M+Na] <sup>+</sup> | C14H30O2   | 253.21380                         | 1.1E+05            | -1.4                   |                        |                        |                        |                        |         |     |
| 740 | Robustine                                                           | [M+K] <sup>+</sup>  | C12H9NO3   | 254.02052                         |                    |                        | 1.7E+05                | 3.5                    |                        |                        |         |     |
| 741 | N-Nonanoylglycine                                                   | [M+K] <sup>+</sup>  | C11H21NO3  | 254.11618                         |                    |                        |                        |                        |                        | 6.7E+04                | -3.5    |     |
| 742 | Solenopsin A                                                        | [M+H] <sup>+</sup>  | C17H35N    | 254.28423                         | 1.3E+05            | -3.9                   |                        |                        |                        |                        |         |     |
| 743 | Bisnorbiotin                                                        | [M+K] <sup>+</sup>  | C8H12N2O3S | 255.02064                         |                    |                        |                        |                        |                        | 1.2E+05                | -2.4    |     |
| 744 | 7,4'-Dihydroxyflavone                                               | [M+H] <sup>+</sup>  | C15H10O4   | 255.06519                         | 7.0E+04            | -0.8                   |                        |                        |                        |                        |         |     |
| 745 | Arginine phosphate                                                  | [M+H] <sup>+</sup>  | C6H15N4O5P | 255.08432                         |                    |                        | 1.6E+06                | 3.8                    | 1.0E+05                | 2.4                    |         |     |
| 746 | N2-Succinyl-L-ornithine                                             | [M+Na] <sup>+</sup> | C9H16N2O5  | 255.09429                         |                    |                        |                        |                        |                        | 5.1E+04                | 3.3     |     |
| 747 | Methyl 4-[2-(2-formyl-vinyl)-3-hydroxy-5-oxo-cyclopentyl]-butanoate | [M+H] <sup>+</sup>  | C13H18O5   | 255.12356                         |                    |                        | 2.4E+06                | -3.4                   |                        |                        |         |     |
| 748 | Hydroxydodecanoic acid                                              | [M+K] <sup>+</sup>  | C12H24O3   | 255.13634                         |                    |                        |                        |                        | 7.1E+04                | -2.5                   |         |     |

| #   | Putative Annotation <sup>a</sup>                  | Ion                 | Formula    | m/z <sub>Theo.</sub> <sup>b</sup> | R2020 <sup>c</sup> | ppm W2020 <sup>c</sup> | ppm B2020 <sup>c</sup> | ppm R2021 <sup>c</sup> | ppm W2021 <sup>c</sup> | ppm B2021 <sup>c</sup> | ppm  |
|-----|---------------------------------------------------|---------------------|------------|-----------------------------------|--------------------|------------------------|------------------------|------------------------|------------------------|------------------------|------|
| 749 | 2-(Acetamidomethylene)-3-(hydroxymethyl)succinate | [M+K] <sup>+</sup>  | C8H11NO6   | 256.02156                         |                    |                        |                        | 5.7E+04                | 0.9                    |                        |      |
| 750 | Methylphenidate                                   | [M+Na] <sup>+</sup> | C14H19NO2  | 256.13004                         |                    |                        |                        |                        |                        | 7.4E+04                | 3.0  |
| 751 | Palmitic amide                                    | [M+H] <sup>+</sup>  | C16H33NO   | 256.26349                         | 5.8E+04            | 0.4                    |                        |                        |                        |                        |      |
| 752 | 2-Oxo-9-methylthiononanoic acid                   | [M+K] <sup>+</sup>  | C10H18O3S  | 257.06082                         | 8.6E+04            | 3.1                    |                        |                        |                        |                        |      |
| 753 | N-Acetylserotonin                                 | [M+K] <sup>+</sup>  | C12H14N2O2 | 257.06868                         |                    |                        |                        | 8.0E+04                | 0.0                    |                        |      |
| 754 | Abrine                                            | [M+K] <sup>+</sup>  | C12H14N2O2 | 257.06877                         |                    |                        |                        |                        |                        | 7.2E+04                | -0.3 |
| 755 | Hydroxysebacic acid                               | [M+K] <sup>+</sup>  | C10H18O5   | 257.07858                         | 2.7E+05            | -2.8                   |                        |                        |                        |                        |      |
| 756 | Phenylglucoside                                   | [M+H] <sup>+</sup>  | C12H16O6   | 257.10216                         |                    |                        | 3.6E+05                | -0.8                   |                        | 1.5E+05                | 3.6  |
| 757 | Benzoylagmatine                                   | [M+Na] <sup>+</sup> | C12H18N4O  | 257.13641                         |                    |                        |                        |                        |                        | 4.7E+04                | 3.4  |
| 758 | Curcumenol                                        | [M+Na] <sup>+</sup> | C15H22O2   | 257.15154                         |                    |                        |                        |                        | 1.7E+05                | -1.3                   |      |
| 759 | 3,3'-Dimethylbisphenol A                          | [M+H] <sup>+</sup>  | C17H20O2   | 257.15361                         | 1.3E+05            | 1.5                    |                        | 4.4E+04                | 1.5                    |                        |      |
| 760 | Hexadecatrienal                                   | [M+Na] <sup>+</sup> | C16H26O    | 257.18733                         |                    |                        | 1.8E+05                | 1.0                    |                        | 2.1E+05                | -1.1 |
| 761 | 4-Nitrophenyl phosphate                           | [M+K] <sup>+</sup>  | C6H6NO6P   | 257.95623                         |                    |                        |                        |                        |                        | 4.0E+04                | 0.8  |
| 762 | Pentahomomethionine                               | [M+K] <sup>+</sup>  | C10H21NO2S | 258.09246                         | 6.0E+04            | 3.7                    |                        |                        |                        |                        |      |
| 763 | Glycerophosphocholine                             | [M+H] <sup>+</sup>  | C8H20NO6P  | 258.11010                         | 1.7E+05            | 3.1                    |                        |                        | 1.1E+05                | 3.8                    |      |
| 764 | Glycosminine                                      | [M+Na] <sup>+</sup> | C15H12N2O  | 259.08418                         | 1.1E+05            | -0.2                   |                        |                        |                        |                        |      |
| 765 | Capsidiol                                         | [M+Na] <sup>+</sup> | C15H24O2   | 259.16664                         |                    |                        | 1.2E+05                | 0.8                    |                        |                        |      |
| 766 | Tetradecanedioic acid                             | [M+H] <sup>+</sup>  | C14H26O4   | 259.19097                         |                    |                        |                        | 1.6E+05                | -2.3                   |                        |      |
| 767 | Apiole                                            | [M+K] <sup>+</sup>  | C12H14O4   | 261.05237                         | 5.5E+05            | 0.7                    |                        |                        |                        |                        |      |
| 768 | 7E,9E,11-Dodecatrienyl acetate                    | [M+K] <sup>+</sup>  | C14H22O2   | 261.12514                         | 1.6E+05            | 0.0                    |                        |                        |                        |                        |      |
| 769 | 1-(4-Hydroxyphenyl)-1-decene-3,5-dione            | [M+H] <sup>+</sup>  | C16H20O3   | 261.14841                         |                    |                        |                        |                        |                        | 2.3E+05                | 0.4  |
| 770 | 3-Hydroxykynurenine                               | [M+K] <sup>+</sup>  | C10H12N2O4 | 263.04208                         |                    |                        |                        | 1.3E+05                | 3.0                    |                        |      |
| 771 | Beta-aspartyl-glutamic acid                       | [M+H] <sup>+</sup>  | C9H14N2O7  | 263.08720                         |                    |                        | 1.4E+06                | 0.7                    |                        |                        |      |
| 772 | L-beta-aspartyl-L-glutamic acid                   | [M+H] <sup>+</sup>  | C9H14N2O7  | 263.08798                         |                    |                        | 2.2E+05                | -2.3                   |                        |                        |      |
| 773 | Ornaline                                          | [M+H] <sup>+</sup>  | C10H18N2O6 | 263.12444                         |                    |                        |                        |                        | 2.8E+05                | -2.6                   |      |
| 774 | Marmasmic acid                                    | [M+H] <sup>+</sup>  | C15H18O4   | 263.12725                         |                    |                        | 2.9E+06                | 2.0                    |                        |                        |      |
| 775 | Acutifolane A                                     | [M+H] <sup>+</sup>  | C16H22O3   | 263.16484                         |                    |                        |                        |                        | 1.4E+05                | -2.5                   |      |
| 776 | Pentadecenoic acid                                | [M+Na] <sup>+</sup> | C15H28O2   | 263.19859                         |                    |                        | 3.9E+05                | -1.7                   |                        |                        |      |
| 777 | Heptadecadiynoic acid                             | [M+H] <sup>+</sup>  | C17H26O2   | 263.20046                         |                    |                        |                        |                        | 1.3E+05                | 0.4                    |      |
| 778 | Dihydroxy-N-benzoyl-L-serine                      | [M+Na] <sup>+</sup> | C10H11NO6  | 264.04693                         |                    |                        |                        | 5.5E+04                | 3.5                    |                        |      |
| 779 | 4-(Dimethylamino)azobenzene                       | [M+K] <sup>+</sup>  | C14H15N3   | 264.08919                         |                    |                        |                        | 6.6E+04                | 2.2                    |                        |      |
| 780 | 3-(Phosphoacetylamido)-L-alanine                  | [M+Na] <sup>+</sup> | C5H11N2O7P | 265.02047                         |                    |                        |                        |                        |                        | 5.4E+04                | -3.3 |
| 781 | Nitrotyrosine                                     | [M+K] <sup>+</sup>  | C9H10N2O5  | 265.02213                         | 7.4E+05            | 3.5                    |                        |                        |                        |                        |      |
| 782 | Thymidine                                         | [M+Na] <sup>+</sup> | C10H14N2O5 | 265.07955                         |                    |                        |                        |                        |                        | 7.3E+04                | -0.2 |
| 783 | N-Acetylcystathionine                             | [M+H] <sup>+</sup>  | C9H16N2O5S | 265.08527                         | 8.0E+05            | 0.1                    |                        |                        |                        |                        |      |
| 784 | 2'-Hydroxyfurano[2'',3'':4',3']chalcone           | [M+H] <sup>+</sup>  | C17H12O3   | 265.08605                         |                    |                        | 1.0E+06                | -0.5                   |                        |                        |      |
| 785 | 2-(6'-Methylthio)hexylmalate                      | [M+H] <sup>+</sup>  | C11H20O5S  | 265.11040                         |                    |                        |                        | 7.5E+04                | 0.1                    |                        |      |
| 786 | Abscisic acid                                     | [M+H] <sup>+</sup>  | C15H20O4   | 265.14264                         |                    |                        | 1.2E+05                | 3.0                    |                        |                        |      |
| 787 | Keto myristic acid                                | [M+Na] <sup>+</sup> | C14H26O3   | 265.17759                         |                    |                        | 2.7E+05                | -0.7                   |                        | 5.6E+05                | -3.6 |

| # Putative Annotation <sup>a</sup>                             | Ion                 | Formula    | m/z <sub>Theo.</sub> <sup>b</sup> | R2020 <sup>c</sup> | ppm W2020 <sup>c</sup> | ppm B2020 <sup>c</sup> | ppm R2021 <sup>c</sup> | ppm W2021 <sup>c</sup> | ppm B2021 <sup>c</sup> | ppm          |
|----------------------------------------------------------------|---------------------|------------|-----------------------------------|--------------------|------------------------|------------------------|------------------------|------------------------|------------------------|--------------|
| 788 Dehydrojuvabione                                           | [M+H] <sup>+</sup>  | C16H24O3   | 265.17963                         |                    |                        |                        | 1.6E+05                | 0.7                    | 1.8E+05                | -1.0         |
| 789 Aroenate                                                   | [M+K] <sup>+</sup>  | C10H13NO5  | 266.04253                         | 8.8E+04            | -0.5                   |                        |                        |                        |                        |              |
| 790 Dehydroadenosine                                           | [M+H] <sup>+</sup>  | C10H11N5O4 | 266.08875                         |                    |                        |                        |                        |                        | 4.6E+04                | -1.4         |
| 791 Annonaine                                                  | [M+H] <sup>+</sup>  | C17H15NO2  | 266.11702                         |                    |                        |                        |                        |                        | 5.6E+04                | 2.0          |
| 792 N-Undecanoylglycine                                        | [M+Na] <sup>+</sup> | C13H25NO3  | 266.17266                         | 7.7E+05            | 0.5                    |                        |                        |                        |                        |              |
| 793 Amino-tetradecanoic acid                                   | [M+Na] <sup>+</sup> | C14H29NO2  | 266.20916                         |                    |                        |                        |                        | 5.9E+04                | -0.4                   |              |
| 794 Deoxyuridine                                               | [M+K] <sup>+</sup>  | C9H12N2O5  | 267.03820                         |                    |                        |                        |                        |                        | 5.8E+04                | -1.6         |
| 795 Resveratrol                                                | [M+K] <sup>+</sup>  | C14H12O3   | 267.04130                         |                    |                        |                        | 6.2E+04                | 1.9                    |                        |              |
| 796 Methyl-dodecanedioic acid                                  | [M+Na] <sup>+</sup> | C13H24O4   | 267.15614                         |                    | 1.8E+05                | 2.0                    | 1.4E+05                | 3.3                    | 2.9E+05                | 1.2          |
| 797 Myristic acid                                              | [M+K] <sup>+</sup>  | C14H28O2   | 267.17237                         |                    |                        |                        | 7.1E+04                | -1.1                   | 1.5E+05                | 3.4          |
| 798 Pentadecanol                                               | [M+K] <sup>+</sup>  | C15H32O    | 267.20932                         |                    |                        | 6.4E+05                | -3.2                   |                        |                        |              |
| 799 2-Amino-4-oxo-6-(1',2'-dioxopropyl)-7,8-dihydroxypteridine | [M+H] <sup>+</sup>  | C9H9N5O5   | 268.06794                         |                    |                        |                        |                        |                        | 4.8E+04                | -1.1         |
| 800 S-Ribosyl-L-homocysteine                                   | [M+H] <sup>+</sup>  | C9H17NO6S  | 268.08432                         |                    |                        |                        |                        |                        | 4.7E+04                | 2.3          |
| 801 Acetylcarnosine                                            | [M+H] <sup>+</sup>  | C11H15N4O4 | 268.11561                         |                    | 1.2E+05                | 3.7                    |                        |                        |                        |              |
| 802 N-Decanoylglycine                                          | [M+K] <sup>+</sup>  | C12H23NO3  | 268.13095                         | 4.6E+05            | 0.5                    |                        |                        |                        |                        |              |
| 803 Aspartyl-L-proline                                         | [M+K] <sup>+</sup>  | C9H14N2O5  | 269.05293                         |                    |                        |                        |                        | 8.4E+04                | 1.9                    | 7.3E+04 -2.3 |
| 804 Saphenic acid                                              | [M+H] <sup>+</sup>  | C15H12N2O3 | 269.09207                         | 8.0E+04            | -3.0                   |                        |                        |                        |                        |              |
| 805 Linderenol                                                 | [M+K] <sup>+</sup>  | C15H18O2   | 269.09383                         |                    |                        |                        | 6.0E+04                | 0.0                    |                        |              |
| 806 3-oxo-2-pentyl-cyclopentanehexanoic acid                   | [M+H] <sup>+</sup>  | C16H28O3   | 269.21042                         |                    |                        |                        |                        |                        | 1.3E+05                | 2.6          |
| 807 7-methyl-6E-hexadecenoic acid                              | [M+H] <sup>+</sup>  | C17H32O2   | 269.24751                         | 1.2E+05            | 2.0                    |                        |                        |                        |                        |              |
| 808 N-Succinyl-L-glutamate 5-semialdehyde                      | [M+K] <sup>+</sup>  | C9H13NO6   | 270.03671                         |                    | 1.1E+05                | 2.7                    |                        |                        |                        |              |
| 809 N-Acetyl-L-glutamyl 5-phosphate                            | [M+H] <sup>+</sup>  | C7H12NO8P  | 270.03725                         |                    |                        |                        |                        | 7.7E+04                | 0.3                    |              |
| 810 Benzoyldehydro-2,3-dihydroxy-benzene                       | [M+K] <sup>+</sup>  | C13H13NO3  | 270.05246                         |                    |                        |                        |                        | 6.5E+04                | 0.9                    |              |
| 811 Isovalerylglutamic acid                                    | [M+K] <sup>+</sup>  | C10H17NO5  | 270.07427                         |                    |                        | 1.5E+05                | -1.6                   |                        |                        |              |
| 812 O-Butanoylcarnitine                                        | [M+K] <sup>+</sup>  | C11H21NO4  | 270.10988                         |                    |                        | 3.1E+05                | 1.2                    |                        |                        |              |
| 813 2,3-Dimethoxy-[2-(4-Pyridinyl)-1-butenyl]phenol            | [M+H] <sup>+</sup>  | C17H19NO2  | 270.14796                         |                    |                        |                        |                        |                        | 8.1E+04                | 3.3          |
| 814 3,5-Dinitro-4-hydroxyphenylpyruvate                        | [M+H] <sup>+</sup>  | C9H6N2O8   | 271.02038                         |                    |                        |                        |                        |                        | 4.5E+04                | -2.5         |
| 815 Melatonin                                                  | [M+K] <sup>+</sup>  | C13H16N2O2 | 271.08434                         | 8.0E+04            | 3.5                    |                        |                        |                        |                        |              |
| 816 Aphylline                                                  | [M+Na] <sup>+</sup> | C15H24N2O  | 271.17794                         |                    |                        | 2.4E+05                | 0.5                    |                        |                        |              |
| 817 Sterol                                                     | [M+Na] <sup>+</sup> | C17H28O    | 271.20369                         |                    | 2.7E+05                | -1.7                   |                        |                        |                        |              |
| 818 Hypusine                                                   | [M+K] <sup>+</sup>  | C10H23N3O3 | 272.13791                         |                    |                        |                        | 5.1E+04                | -3.0                   |                        |              |
| 819 2-amino-hexadecanoic acid                                  | [M+H] <sup>+</sup>  | C16H33NO2  | 272.25939                         |                    |                        |                        |                        |                        | 2.1E+05                | -3.6         |
| 820 2-Hydroxy-6-oxo-6-(2-hydroxyphenyl)-hexa-2,4-dienoate      | [M+K] <sup>+</sup>  | C12H10O5   | 273.01598                         | 6.3E+04            | 1.2                    |                        |                        |                        | 7.3E+04                | 3.6          |
| 821 Gamma-Glutamylcysteine                                     | [M+Na] <sup>+</sup> | C8H14N2O5S | 273.05096                         |                    |                        |                        | 7.6E+04                | 2.2                    |                        |              |
| 822 2,2-Dimethyl-8-prenylchromene 6-carboxylic acid            | [M+H] <sup>+</sup>  | C17H20O3   | 273.14833                         |                    |                        |                        |                        | 2.2E+05                | 0.7                    |              |
| 823 Hexadecatrienoic acid                                      | [M+Na] <sup>+</sup> | C16H26O2   | 273.18278                         |                    | 4.4E+05                | -1.0                   |                        |                        |                        |              |

| # Putative Annotation <sup>a</sup>                                      | Ion                 | Formula     | m/z <sub>Theo.</sub> <sup>b</sup> | R2020 <sup>c</sup> | ppm W2020 <sup>c</sup> | ppm B2020 <sup>c</sup> | ppm R2021 <sup>c</sup> | ppm W2021 <sup>c</sup> | ppm B2021 <sup>c</sup> | ppm         |
|-------------------------------------------------------------------------|---------------------|-------------|-----------------------------------|--------------------|------------------------|------------------------|------------------------|------------------------|------------------------|-------------|
| 824 Retamine                                                            | [M+Na] <sup>+</sup> | C15H26N2O   | 273.19306                         |                    |                        | 1.7E+05                | 2.5                    |                        |                        |             |
| 825 Methylhexadecane-1,2-diol                                           | [M+H] <sup>+</sup>  | C17H36O2    | 273.27876                         |                    |                        |                        |                        | 1.0E+05                | 0.2                    |             |
| 826 Hexadecaspinganine                                                  | [M+H] <sup>+</sup>  | C16H35NO2   | 274.27350                         |                    |                        |                        |                        | 2.9E+05                | 2.0                    | 2.0E+05 1.9 |
| 827 S-(Phenylacetothiohydroximoyl)-L-cysteine                           | [M+Na] <sup>+</sup> | C11H14N2O3S | 277.06132                         |                    | 1.7E+05                | 1.5                    |                        |                        |                        |             |
| 828 4'-Hydroxy-2'-methoxychalcone                                       | [M+Na] <sup>+</sup> | C16H14O3    | 277.08358                         |                    |                        |                        |                        |                        | 4.4E+05                | -0.2        |
| 829 Biotin sulfone                                                      | [M+H] <sup>+</sup>  | C10H16N2O5S | 277.08443                         |                    |                        | 5.9E+05                | 3.0                    |                        |                        |             |
| 830 methyl 4-[2-(2-formyl-vinyl)-3-hydroxy-5-oxo-cyclopentyl]-butanoate | [M+Na] <sup>+</sup> | C13H18O5    | 277.10464                         | 4.0E+05            | 0.8                    |                        |                        |                        |                        |             |
| 831 Palmitoleic acid                                                    | [M+Na] <sup>+</sup> | C16H30O2    | 277.21380                         | 4.0E+05            | 1.7                    | 2.0E+06                | 0.1                    |                        |                        |             |
| 832 1,2-Dihydroxynaphthalene-6-sulfonate                                | [M+K] <sup>+</sup>  | C10H8O5S    | 278.97192                         |                    |                        |                        |                        |                        | 1.5E+05                | 1.7         |
| 833 Ascorbate 2-sulfate                                                 | [M+Na] <sup>+</sup> | C6H8O9S     | 278.97825                         |                    | 2.1E+05                | -0.5                   |                        |                        |                        |             |
| 834 Dihydroflavonol                                                     | [M+K] <sup>+</sup>  | C15H12O3    | 279.04220                         |                    |                        |                        |                        | 2.2E+05                | -1.4                   |             |
| 835 alhpa-tocopheronolactone                                            | [M+H] <sup>+</sup>  | C16H22O4    | 279.15921                         |                    | 4.1E+06                | -0.4                   |                        |                        | 1.8E+06                | -1.7        |
| 836 4-keto pentadecanoic acid                                           | [M+Na] <sup>+</sup> | C15H28O3    | 279.19319                         |                    |                        |                        | 5.6E+05                | -0.5                   |                        |             |
| 837 Palmitic acid                                                       | [M+Na] <sup>+</sup> | C16H32O2    | 279.22945                         | 1.7E+05            | -0.3                   |                        |                        |                        |                        |             |
| 838 alpha-linolenic acid                                                | [M+H] <sup>+</sup>  | C18H30O2    | 279.23125                         |                    | 8.5E+05                | 2.2                    |                        |                        |                        |             |
| 839 Glycerophosphocholine                                               | [M+Na] <sup>+</sup> | C8H20NO6P   | 280.09204                         | 1.5E+05            | -2.0                   |                        |                        |                        |                        |             |
| 840 Apigeniflavan                                                       | [M+Na] <sup>+</sup> | C15H14O4    | 281.07828                         |                    |                        | 9.9E+05                | 0.5                    |                        |                        |             |
| 841 Glycerophosphocholine                                               | [M+Na] <sup>+</sup> | C8H21NO6P   | 281.10076                         |                    |                        | 4.0E+06                | -3.2                   |                        |                        |             |
| 842 Falcarinone                                                         | [M+K] <sup>+</sup>  | C17H22O     | 281.13014                         |                    | 9.5E+04                | 0.3                    |                        |                        | 6.9E+04                | -3.3        |
| 843 Phaseic acid                                                        | [M+H] <sup>+</sup>  | C15H20O5    | 281.13875                         |                    |                        | 4.4E+06                | -1.4                   |                        |                        |             |
| 844 1-(3,4-Dihydroxyphenyl)-5-hydroxy-3-decanone                        | [M+H] <sup>+</sup>  | C16H24O4    | 281.17488                         |                    |                        |                        | 4.2E+05                | -0.5                   | 3.1E+05                | 2.9         |
| 845 N-Undecanoylglycine                                                 | [M+K] <sup>+</sup>  | C13H25NO3   | 282.14660                         | 8.2E+05            | 0.3                    |                        |                        |                        |                        |             |
| 846 Uridine                                                             | [M+K] <sup>+</sup>  | C9H12N2O6   | 283.03186                         |                    |                        |                        |                        | 9.2E+04                | 3.0                    |             |
| 847 Piceatannol                                                         | [M+K] <sup>+</sup>  | C14H12O4    | 283.03682                         |                    |                        |                        | 6.3E+04                | -0.4                   |                        |             |
| 848 Biotin                                                              | [M+K] <sup>+</sup>  | C10H16N2O3S | 283.05159                         |                    | 8.9E+04                | -0.9                   |                        |                        |                        |             |
| 849 Corylinal                                                           | [M+H] <sup>+</sup>  | C16H10O5    | 283.06091                         |                    |                        |                        |                        | 8.5E+04                | -2.9                   |             |
| 850 Hemigossypol                                                        | [M+Na] <sup>+</sup> | C15H16O4    | 283.09455                         |                    |                        | 8.6E+05                | -1.7                   |                        |                        |             |
| 851 Dihydrophaseic acid                                                 | [M+H] <sup>+</sup>  | C15H22O5    | 283.15497                         |                    |                        | 2.4E+06                | -3.4                   |                        |                        |             |
| 852 Cadamine                                                            | [M+H] <sup>+</sup>  | C15H26N2O3  | 283.20162                         | 7.3E+04            | -2.4                   |                        |                        |                        |                        |             |
| 853 Oleic acid                                                          | [M+H] <sup>+</sup>  | C18H34O2    | 283.26316                         | 1.3E+05            | 2.4                    |                        |                        |                        |                        |             |
| 854 Guanosine                                                           | [M+H] <sup>+</sup>  | C10H13N5O5  | 284.09881                         |                    |                        | 1.8E+05                | 0.5                    |                        |                        |             |
| 855 Homovanillic acid sulfate                                           | [M+Na] <sup>+</sup> | C9H10O7S    | 285.00449                         |                    |                        |                        |                        |                        | 7.0E+04                | -1.9        |
| 856 Maclurin                                                            | [M+Na] <sup>+</sup> | C13H10O6    | 285.03715                         |                    |                        |                        | 1.3E+05                | -0.7                   |                        |             |
| 857 7,4',5'-Trihydroxy-5,2'-oxido-4-phenylcoumarin                      | [M+H] <sup>+</sup>  | C15H8O6     | 285.03936                         | 9.7E+04            | -2.7                   |                        |                        |                        |                        |             |
| 858 Aromaticin                                                          | [M+K] <sup>+</sup>  | C15H18O3    | 285.08917                         |                    |                        | 4.3E+05                | -1.5                   |                        |                        |             |
| 859 Caffeic acid phenethyl ester                                        | [M+H] <sup>+</sup>  | C17H16O4    | 285.11214                         | 1.7E+05            | -2.3                   |                        |                        |                        |                        |             |
| 860 Cernuine                                                            | [M+Na] <sup>+</sup> | C16H26N2O   | 285.19373                         | 1.4E+05            | -2.5                   |                        |                        |                        |                        |             |

| # Putative Annotation <sup>a</sup>                                    | Ion                 | Formula     | m/z <sub>Theo.</sub> <sup>b</sup> | R2020 <sup>c</sup> | ppm W2020 <sup>c</sup> | ppm B2020 <sup>c</sup> | ppm R2021 <sup>c</sup> | ppm W2021 <sup>c</sup> | ppm B2021 <sup>c</sup> | ppm  |
|-----------------------------------------------------------------------|---------------------|-------------|-----------------------------------|--------------------|------------------------|------------------------|------------------------|------------------------|------------------------|------|
| 861 L-beta-aspartyl-L-aspartic acid                                   | [M+K] <sup>+</sup>  | C8H12N2O7   | 287.02761                         | 6.9E+04            | -3.3                   |                        |                        |                        |                        |      |
| 862 Hydroxyindoleacetyl glycine                                       | [M+K] <sup>+</sup>  | C12H12N2O4  | 287.04287                         | 6.6E+04            | 3.0                    |                        |                        |                        |                        |      |
| 863 5'-Phosphoribosylglycinamide                                      | [M+H] <sup>+</sup>  | C7H15N2O8P  | 287.06463                         |                    |                        | 3.0E+05                | -2.6                   |                        |                        |      |
| 864 1'-Acetoxyeugenol acetate                                         | [M+Na] <sup>+</sup> | C14H16O5    | 287.08870                         |                    |                        |                        | 5.6E+04                | 1.0                    |                        |      |
| 865 4-(Hydroxymethyl)phenyl-beta-D-glucopyranoside                    | [M+H] <sup>+</sup>  | C13H18O7    | 287.11263                         |                    |                        |                        | 5.5E+04                | -0.4                   |                        |      |
| 866 N-Acetyl-leucyl-leucine                                           | [M+H] <sup>+</sup>  | C14H26N2O4  | 287.19743                         |                    | 2.9E+05                | -3.1                   |                        |                        |                        |      |
| 867 3,7,11-Trimethyl-2,6,10-dodecatrienyl acetate                     | [M+Na] <sup>+</sup> | C17H28O2    | 287.19891                         |                    |                        |                        | 5.9E+04                | -2.6                   | 1.6E+05                | -0.4 |
| 868 Pyridoxine 5'-phosphate                                           | [M+K] <sup>+</sup>  | C8H12NO6P   | 288.00406                         |                    |                        |                        |                        |                        | 7.1E+04                | -2.4 |
| 869 C17 Sphinganine                                                   | [M+H] <sup>+</sup>  | C17H37NO2   | 288.29012                         |                    |                        |                        |                        | 1.0E+06                | -1.4                   |      |
| 870 Xanthoxic acid                                                    | [M+Na] <sup>+</sup> | C15H22O4    | 289.14103                         | 2.7E+05            | -1.9                   |                        |                        |                        |                        |      |
| 871 Karwinaphthol B                                                   | [M+H] <sup>+</sup>  | C17H20O4    | 289.14363                         |                    |                        | 5.5E+05                | -0.7                   |                        |                        |      |
| 872 Methyl 2-(4-isopropyl-4-methyl-5-oxo-2-imidazolin-2-yl)-p-toluate | [M+H] <sup>+</sup>  | C16H20N2O3  | 289.15473                         |                    |                        |                        |                        |                        | 1.9E+05                | -0.2 |
| 873 4,7,10-hexadecatrienoic acid                                      | [M+K] <sup>+</sup>  | C16H26O2    | 289.15548                         |                    |                        |                        |                        | 1.9E+05                | 3.3                    |      |
| 874 Elaeocarpidine                                                    | [M+Na] <sup>+</sup> | C17H21N3    | 290.16276                         |                    |                        | 4.4E+05                | 0.0                    |                        |                        |      |
| 875 Azaadenosine                                                      | [M+Na] <sup>+</sup> | C9H12N6O4   | 291.08039                         |                    |                        |                        |                        |                        | 3.4E+05                | 2.9  |
| 876 Aurin                                                             | [M+H] <sup>+</sup>  | C19H14O3    | 291.10155                         |                    |                        |                        |                        |                        | 1.4E+06                | 0.1  |
| 877 5-O-Methylvisamminol                                              | [M+H] <sup>+</sup>  | C16H18O5    | 291.12173                         |                    |                        | 1.7E+06                | 3.3                    |                        |                        |      |
| 878 Shikimate 3-phosphate                                             | [M+K] <sup>+</sup>  | C7H11O8P    | 292.98199                         |                    |                        |                        | 7.2E+04                | 1.1                    |                        |      |
| 879 Gingerdione                                                       | [M+H] <sup>+</sup>  | C17H24O4    | 293.17513                         |                    |                        |                        | 7.5E+04                | -1.3                   | 9.0E+04                | 0.5  |
| 880 Dihydrobunolol                                                    | [M+H] <sup>+</sup>  | C17H27NO3   | 294.20676                         |                    |                        |                        |                        | 1.2E+05                | -1.3                   |      |
| 881 N-Glycosyl-L-asparagine                                           | [M+H] <sup>+</sup>  | C10H18N2O8  | 295.11347                         |                    |                        |                        |                        | 1.1E+05                | 0.4                    |      |
| 882 Aspartame                                                         | [M+H] <sup>+</sup>  | C14H18N2O5  | 295.12885                         | 2.6E+06            | -1.0                   |                        |                        |                        | 4.0E+05                | -2.7 |
| 883 Methyl-tetradecanedioic acid                                      | [M+Na] <sup>+</sup> | C15H28O4    | 295.18836                         |                    | 2.4E+05                | -1.3                   |                        |                        |                        |      |
| 884 Dimethyladenosine                                                 | [M+H] <sup>+</sup>  | C12H17N5O4  | 296.13446                         |                    |                        |                        |                        |                        | 6.5E+04                | 2.9  |
| 885 Apigeniflavan                                                     | [M+K] <sup>+</sup>  | C15H14O4    | 297.05177                         |                    |                        |                        | 6.1E+04                | 2.0                    |                        |      |
| 886 hydroxy-linoleic acid                                             | [M+H] <sup>+</sup>  | C18H32O3    | 297.24297                         |                    |                        |                        | 2.9E+05                | -1.9                   | 2.3E+05                | -1.5 |
| 887 Thiomethyladenosine                                               | [M+H] <sup>+</sup>  | C11H15N5O3S | 298.09690                         |                    |                        | 2.2E+05                | -0.2                   |                        |                        |      |
| 888 Hexanoylcarnitine                                                 | [M+K] <sup>+</sup>  | C13H25NO4   | 298.14172                         |                    |                        |                        |                        | 8.7E+04                | -0.7                   |      |
| 889 Demethylbellidifolin                                              | [M+K] <sup>+</sup>  | C13H8O6     | 298.99525                         | 7.5E+04            | 0.6                    |                        |                        |                        |                        |      |
| 890 Prephenyllactate                                                  | [M+H] <sup>+</sup>  | C13H14O8    | 299.07572                         |                    |                        |                        |                        | 1.7E+05                | 1.4                    |      |
| 891 Falcarindiol                                                      | [M+K] <sup>+</sup>  | C17H24O2    | 299.14154                         |                    |                        |                        | 1.9E+05                | -2.5                   | 2.5E+05                | 0.2  |
| 892 Dihydroxy myristic acid                                           | [M+K] <sup>+</sup>  | C14H28O4    | 299.16106                         |                    |                        |                        | 3.9E+05                | 2.9                    |                        |      |
| 893 Stearidonic acid                                                  | [M+Na] <sup>+</sup> | C18H28O2    | 299.19724                         |                    |                        |                        |                        | 4.1E+05                | 3.0                    |      |
| 894 Pyrimidine 5'-deoxynucleotide                                     | [M+Na] <sup>+</sup> | C9H14N2O6P  | 300.04861                         |                    |                        |                        | 6.4E+04                | -1.5                   |                        |      |
| 895 Palmitoylethanolamide                                             | [M+H] <sup>+</sup>  | C18H37NO2   | 300.28971                         | 2.1E+05            | -1.7                   | 3.2E+05                | -1.9                   |                        |                        |      |
| 896 Artecanin                                                         | [M+Na] <sup>+</sup> | C15H18O5    | 301.10431                         |                    |                        | 1.8E+05                | 1.1                    |                        |                        |      |
| 897 alhpa-tocopheronolactone                                          | [M+Na] <sup>+</sup> | C16H22O4    | 301.14103                         | 1.7E+06            | 0.8                    | 5.6E+06                | -0.6                   |                        | 6.3E+06                | -2.3 |
| 898 Trimethoxyflavan                                                  | [M+H] <sup>+</sup>  | C18H20O4    | 301.14386                         |                    |                        |                        | 2.4E+06                | -1.4                   |                        |      |

| # Putative Annotation <sup>a</sup>                            | Ion                 | Formula    | m/z <sub>Theo.</sub> <sup>b</sup> | R2020 <sup>c</sup> | ppm W2020 <sup>c</sup> | ppm B2020 <sup>c</sup> | ppm R2021 <sup>c</sup> | ppm W2021 <sup>c</sup> | ppm B2021 <sup>c</sup> | ppm  |
|---------------------------------------------------------------|---------------------|------------|-----------------------------------|--------------------|------------------------|------------------------|------------------------|------------------------|------------------------|------|
| 899 Pinolenic acid                                            | [M+Na] <sup>+</sup> | C18H30O2   | 301.21385                         |                    |                        | 2.3E+05                | -0.2                   |                        |                        |      |
| 900 Hydroxy stearic acid                                      | [M+H] <sup>+</sup>  | C18H36O3   | 301.27465                         |                    | 4.2E+05                | -3.1                   |                        |                        |                        |      |
| 901 Sphinganine                                               | [M+H] <sup>+</sup>  | C18H39NO2  | 302.30536                         | 9.2E+04            | 2.1                    |                        |                        |                        | 1.8E+05                | -2.6 |
| 902 3-Methoxy-4-Hydroxyphenylglycol sulfate                   | [M+K] <sup>+</sup>  | C9H12O7S   | 302.99329                         |                    |                        |                        |                        | 7.3E+04                | 0.8                    |      |
| 903 Ellagic acid                                              | [M+H] <sup>+</sup>  | C14H6O8    | 303.01354                         | 7.8E+04            | -0.9                   |                        |                        |                        |                        |      |
| 904 2-(6'-Methylthio)hexylmalic acid                          | [M+K] <sup>+</sup>  | C11H20O5S  | 303.06716                         |                    |                        |                        |                        | 1.2E+05                | -2.8                   |      |
| 905 2-(4-Methoxyphenethyl)chromone                            | [M+Na] <sup>+</sup> | C18H16O3   | 303.09917                         | 7.5E+04            | 0.6                    |                        |                        |                        |                        |      |
| 906 Absciscic acid                                            | [M+K] <sup>+</sup>  | C15H20O4   | 303.09957                         |                    |                        |                        |                        | 1.4E+05                | -0.8                   |      |
| 907 Subaphyllin                                               | [M+K] <sup>+</sup>  | C14H20N2O3 | 303.11066                         |                    |                        |                        |                        |                        | 1.0E+05                | -0.4 |
| 908 Phaseic acid                                              | [M+Na] <sup>+</sup> | C15H20O5   | 303.12029                         | 8.9E+04            | -2.2                   | 4.0E+05                | -0.4                   | 1.3E+05                | 1.3                    |      |
| 909 Eicosapentaenoic acid                                     | [M+H] <sup>+</sup>  | C20H30O2   | 303.23186                         | 4.4E+05            | -1.9                   |                        |                        |                        |                        |      |
| 910 Methyladenosine                                           | [M+Na] <sup>+</sup> | C11H15N5O4 | 304.10074                         |                    | 1.6E+05                | 2.9                    |                        |                        |                        |      |
| 911 Arachidonoyl amine                                        | [M+H] <sup>+</sup>  | C20H33NO   | 304.26439                         |                    |                        |                        | 3.2E+05                | -3.0                   |                        |      |
| 912 Methylinosine                                             | [M+Na] <sup>+</sup> | C11H14N4O5 | 305.08565                         |                    |                        |                        |                        |                        | 1.0E+05                | 0.0  |
| 913 Catechin 4'-methyl ether                                  | [M+H] <sup>+</sup>  | C16H16O6   | 305.10196                         | 1.2E+05            | -3.1                   |                        |                        |                        |                        |      |
| 914 Oleic acid                                                | [M+Na] <sup>+</sup> | C18H34O2   | 305.24525                         |                    | 1.6E+06                | -0.5                   |                        |                        |                        |      |
| 915 Matricin                                                  | [M+H] <sup>+</sup>  | C17H22O5   | 307.15445                         |                    |                        | 3.3E+06                | -1.5                   |                        |                        |      |
| 916 3-oxo-2-pentyl-cyclopentanehexanoic acid                  | [M+K] <sup>+</sup>  | C16H28O3   | 307.16700                         | 7.8E+04            | 2.1                    |                        |                        |                        |                        |      |
| 917 Retinal                                                   | [M+Na] <sup>+</sup> | C20H28O    | 307.20327                         |                    | 1.5E+05                | -0.1                   |                        |                        |                        |      |
| 918 Eicosatrienoic acid                                       | [M+H] <sup>+</sup>  | C20H34O2   | 307.26320                         |                    | 4.6E+05                | -0.1                   |                        |                        |                        |      |
| 919 Leu-Gly-Pro                                               | [M+Na] <sup>+</sup> | C13H23N3O4 | 308.15785                         |                    |                        | 4.8E+05                | 0.7                    |                        |                        |      |
| 920 4-Hydrocinnamoyl-2,2,5-trimethyl-4-cyclopentene-1,3-dione | [M+K] <sup>+</sup>  | C17H18O3   | 309.08899                         |                    |                        | 1.2E+06                | -0.8                   |                        |                        |      |
| 921 Fructoselysine                                            | [M+H] <sup>+</sup>  | C12H24N2O7 | 309.16591                         |                    |                        |                        | 9.7E+04                | -0.9                   |                        |      |
| 922 O-Methylembelin                                           | [M+H] <sup>+</sup>  | C18H28O4   | 309.20604                         | 2.3E+05            | -2.5                   |                        |                        |                        | 1.2E+05                | -2.2 |
| 923 Tridecanoylglycine                                        | [M+K] <sup>+</sup>  | C15H29NO3  | 310.17700                         |                    |                        | 4.3E+05                | 2.9                    |                        |                        |      |
| 924 Gamma-Glutamyltyrosine                                    | [M+H] <sup>+</sup>  | C14H18N2O6 | 311.12376                         | 1.8E+05            | 0.7                    |                        |                        | 8.2E+04                | -1.6                   |      |
| 925 Cupreine                                                  | [M+H] <sup>+</sup>  | C19H22N2O2 | 311.17540                         | 1.0E+05            | 2.1                    |                        |                        |                        |                        |      |
| 926 9-hydroperoxy-10E,12,15Z-octadecatrienoic acid            | [M+H] <sup>+</sup>  | C18H30O4   | 311.22229                         |                    |                        |                        | 6.3E+04                | -1.9                   |                        |      |
| 927 Thyronine                                                 | [M+K] <sup>+</sup>  | C15H15NO4  | 312.06260                         |                    |                        |                        |                        |                        | 1.1E+05                | 2.1  |
| 928 Taxiphyllin                                               | [M+H] <sup>+</sup>  | C14H17NO7  | 312.10849                         |                    |                        |                        |                        | 1.0E+05                | -2.3                   |      |
| 929 Hydroxycinnamyl alcohol 4-D-glucoside                     | [M+H] <sup>+</sup>  | C15H20O7   | 313.12852                         |                    |                        |                        |                        | 1.4E+05                | -1.1                   |      |
| 930 Sauroxine                                                 | [M+K] <sup>+</sup>  | C17H26N2O  | 313.16700                         |                    |                        | 1.2E+06                | 2.1                    |                        | 1.5E+05                | -2.4 |
| 931 Hydroperoxylinoic acid                                    | [M+H] <sup>+</sup>  | C18H32O4   | 313.23814                         |                    |                        |                        |                        | 4.9E+05                | -2.6                   |      |
| 932 Beta-D-Glucopyranuronic acid                              | [M+H] <sup>+</sup>  | C13H14O9   | 315.07106                         | 6.9E+04            | 0.5                    |                        |                        |                        |                        |      |
| 933 Coumatetralyl                                             | [M+Na] <sup>+</sup> | C19H16O3   | 315.09951                         |                    |                        | 3.1E+05                | -1.1                   |                        |                        |      |
| 934 Grevillol                                                 | [M+Na] <sup>+</sup> | C19H32O2   | 315.23037                         |                    |                        |                        |                        |                        | 7.8E+04                | -2.9 |
| 935 Octadecanedioic acid                                      | [M+H] <sup>+</sup>  | C18H34O4   | 315.25299                         | 7.0E+05            | -0.7                   | 1.3E+06                | -1.4                   |                        |                        |      |
| 936 Rosinidin                                                 | [M+H] <sup>+</sup>  | C17H15O6   | 316.09414                         | 6.8E+04            | 2.9                    |                        |                        |                        |                        |      |

| # Putative Annotation <sup>a</sup>                          | Ion                 | Formula    | m/z <sub>Theo.</sub> <sup>b</sup> | R2020 <sup>c</sup> | ppm W2020 <sup>c</sup> | ppm B2020 <sup>c</sup> | ppm R2021 <sup>c</sup> | ppm W2021 <sup>c</sup> | ppm B2021 <sup>c</sup> | ppm  |
|-------------------------------------------------------------|---------------------|------------|-----------------------------------|--------------------|------------------------|------------------------|------------------------|------------------------|------------------------|------|
| 937 Melosatin B                                             | [M+Na] <sup>+</sup> | C19H19NO2  | 316.13098                         |                    |                        |                        | 9.5E+04                | -0.6                   |                        |      |
| 938 Dehydrophytosphingosine                                 | [M+H] <sup>+</sup>  | C18H37NO3  | 316.28462                         | 9.1E+05            | -0.3                   |                        |                        |                        | 3.0E+05                | -0.9 |
| 939 L-phenylalanyl-L-hydroxyproline                         | [M+K] <sup>+</sup>  | C14H18N2O4 | 317.08985                         |                    |                        |                        | 1.1E+05                | -0.1                   | 1.6E+05                | 2.9  |
| 940 alhpa-tocopheronolactone                                | [M+K] <sup>+</sup>  | C16H22O4   | 317.11479                         |                    | 1.5E+06                | 0.6                    |                        |                        | 2.9E+05                | 1.8  |
| 941 2-Butyl-3-(4-hydroxybenzoyl)benzofuran                  | [M+Na] <sup>+</sup> | C19H18O3   | 317.11482                         | 2.7E+06            | -0.7                   |                        |                        |                        |                        |      |
| 942 alhpa-tocopheronolactone                                | [M+K] <sup>+</sup>  | C16H22O4   | 317.11500                         |                    |                        |                        | 1.2E+05                | -0.1                   |                        |      |
| 943 4-Hydroxy-5,7,4'-trimethoxyflavan                       | [M+H] <sup>+</sup>  | C18H20O5   | 317.13903                         |                    |                        | 2.4E+05                | -2.1                   |                        | 2.8E+05                | 2.4  |
| 944 Gibberellin A9                                          | [M+H] <sup>+</sup>  | C19H24O4   | 317.17486                         |                    |                        |                        |                        |                        | 3.5E+05                | -0.4 |
| 945 2-hydroxy-9Z,12Z,15Z-octadecatrienoic acid              | [M+Na] <sup>+</sup> | C18H30O3   | 317.20794                         |                    |                        |                        |                        |                        | 1.2E+05                | 2.4  |
| 946 Eicosenal                                               | [M+Na] <sup>+</sup> | C20H38O    | 317.28081                         |                    | 1.1E+05                | 2.1                    |                        |                        |                        |      |
| 947 Dimethyladenosine                                       | [M+Na] <sup>+</sup> | C12H17N5O4 | 318.11762                         |                    | 2.9E+05                | -1.1                   |                        |                        |                        |      |
| 948 Phytosphingosine                                        | [M+H] <sup>+</sup>  | C18H39NO3  | 318.30027                         | 1.0E+06            | 0.6                    |                        |                        |                        |                        |      |
| 949 L-beta-aspartyl-L-phenylalanine                         | [M+K] <sup>+</sup>  | C13H16N2O5 | 319.06830                         |                    |                        | 2.7E+05                | 2.4                    |                        |                        |      |
| 950 Methylaminoadenosine                                    | [M+Na] <sup>+</sup> | C11H16N6O4 | 319.11168                         |                    | 1.7E+05                | 2.6                    |                        |                        |                        |      |
| 951 Linoleic acid                                           | [M+K] <sup>+</sup>  | C18H32O2   | 319.20334                         |                    | 2.7E+05                | 0.2                    |                        |                        |                        |      |
| 952 Oleamide                                                | [M+K] <sup>+</sup>  | C18H35NO   | 320.23580                         |                    |                        |                        |                        |                        | 8.6E+04                | -2.4 |
| 953 2,3-Diphenyl-1-indanone                                 | [M+K] <sup>+</sup>  | C21H14O    | 321.06736                         |                    |                        |                        | 8.2E+04                | 0.8                    |                        |      |
| 954 Methylguanosine                                         | [M+Na] <sup>+</sup> | C11H16N5O5 | 321.10436                         | 1.3E+05            | 2.9                    |                        |                        |                        |                        |      |
| 955 Mugineic acid                                           | [M+H] <sup>+</sup>  | C12H20N2O8 | 321.12968                         |                    |                        |                        |                        |                        | 3.0E+05                | -1.4 |
| 956 Dehydroretinal                                          | [M+K] <sup>+</sup>  | C20H26O    | 321.16073                         |                    | 1.2E+05                | 2.5                    |                        |                        |                        |      |
| 957 Quebrachamine                                           | [M+K] <sup>+</sup>  | C19H26N2   | 321.17220                         |                    |                        |                        |                        |                        | 2.7E+05                | 1.7  |
| 958 Hydroxy-arachidonic acid                                | [M+H] <sup>+</sup>  | C20H32O3   | 321.24320                         |                    | 2.3E+05                | -2.4                   |                        |                        |                        |      |
| 959 8-Anilino-1-naphthalene sulfonic acid                   | [M+Na] <sup>+</sup> | C16H13NO3S | 322.05083                         | 8.4E+04            | -1.1                   |                        |                        |                        |                        |      |
| 960 Digallic acid                                           | [M+H] <sup>+</sup>  | C14H10O9   | 323.03997                         |                    |                        |                        | 7.4E+04                | -0.7                   |                        |      |
| 961 2'-Hydroxy-4',6'-dimethoxy-3'-methylidihydrochalcone    | [M+Na] <sup>+</sup> | C18H20O4   | 323.12538                         | 1.7E+05            | 0.7                    |                        |                        |                        |                        |      |
| 962 Tetranor-PGF1alpha                                      | [M+Na] <sup>+</sup> | C16H28O5   | 323.18336                         |                    |                        |                        | 7.4E+04                | -1.4                   |                        |      |
| 963 Retinoic acid                                           | [M+Na] <sup>+</sup> | C20H28O2   | 323.19815                         | 1.1E+05            | -1.5                   | 9.9E+04                | 0.8                    |                        |                        |      |
| 964 Gingerol                                                | [M+H] <sup>+</sup>  | C19H30O4   | 323.22086                         |                    |                        |                        |                        |                        | 1.7E+05                | 2.6  |
| 965 Stearic acid                                            | [M+K] <sup>+</sup>  | C18H36O2   | 323.23451                         |                    |                        | 9.5E+05                | 0.6                    |                        |                        |      |
| 966 Hydroxystearate                                         | [M+Na] <sup>+</sup> | C18H36O3   | 323.25616                         |                    |                        | 5.3E+05                | -1.5                   |                        |                        |      |
| 967 Myristoylglycine                                        | [M+K] <sup>+</sup>  | C16H31NO3  | 324.19355                         | 7.7E+04            | 0.0                    |                        |                        |                        |                        |      |
| 968 Galactosylhydroxylysine                                 | [M+H] <sup>+</sup>  | C12H24N2O8 | 325.16132                         |                    |                        |                        |                        |                        | 2.2E+05                | -2.4 |
| 969 12-oxo-14,18-dihydroxy-9Z,13E,15Z-octadecatrienoic acid | [M+H] <sup>+</sup>  | C18H28O5   | 325.20095                         | 1.1E+05            | -1.0                   |                        |                        |                        |                        |      |
| 970 Alchornoic acid                                         | [M+H] <sup>+</sup>  | C20H36O3   | 325.27453                         |                    |                        |                        |                        |                        | 4.4E+05                | -2.5 |
| 971 Farnesylcysteine                                        | [M+H] <sup>+</sup>  | C18H31NO2S | 326.21406                         |                    | 1.3E+05                | 2.4                    |                        |                        |                        |      |
| 972 Dihydrokaempferol                                       | [M+K] <sup>+</sup>  | C15H12O6   | 327.02709                         |                    | 1.1E+05                | -1.7                   |                        |                        |                        |      |
| 973 Hydroxyflemichapparin C                                 | [M+H] <sup>+</sup>  | C17H10O7   | 327.05057                         |                    |                        | 3.3E+05                | -2.0                   |                        |                        |      |
| 974 Hinokitiol glucoside                                    | [M+H] <sup>+</sup>  | C16H22O7   | 327.14355                         |                    |                        | 1.1E+06                | 0.9                    |                        |                        |      |

| # Putative Annotation <sup>a</sup>                                                     | Ion                 | Formula     | m/z <sub>Theo.</sub> <sup>b</sup> | R2020 <sup>c</sup> | ppm W2020 <sup>c</sup> | ppm B2020 <sup>c</sup> | ppm R2021 <sup>c</sup> | ppm W2021 <sup>c</sup> | ppm B2021 <sup>c</sup> | ppm  |
|----------------------------------------------------------------------------------------|---------------------|-------------|-----------------------------------|--------------------|------------------------|------------------------|------------------------|------------------------|------------------------|------|
| 975 Acutifolin A                                                                       | [M+H] <sup>+</sup>  | C20H22O4    | 327.15980                         |                    |                        |                        | 1.6E+05                | -2.2                   |                        |      |
| 976 Capsaicin                                                                          | [M+Na] <sup>+</sup> | C18H27NO3   | 328.18836                         |                    |                        |                        | 7.6E+04                | -0.1                   |                        |      |
| 977 Lonchocarpin                                                                       | [M+Na] <sup>+</sup> | C20H18O3    | 329.11480                         |                    |                        | 3.0E+05                | 0.0                    |                        |                        |      |
| 978 Eicosatrienoic acid                                                                | [M+Na] <sup>+</sup> | C20H34O2    | 329.24577                         |                    | 9.6E+04                | -2.0                   |                        |                        |                        |      |
| 979 Adenosine 2',3'-cyclic phosphate                                                   | [M+H] <sup>+</sup>  | C10H12N5O6P | 330.05980                         | 1.2E+05            | 0.7                    |                        |                        |                        |                        |      |
| 980 Stealthin C                                                                        | [M+Na] <sup>+</sup> | C18H13NO4   | 330.07322                         |                    |                        |                        | 1.2E+05                | 1.4                    |                        |      |
| 981 Glutathione                                                                        | [M+Na] <sup>+</sup> | C10H17N3O6S | 330.07400                         |                    |                        |                        |                        | 1.3E+05                | -3.0                   |      |
| 982 Gingerdione                                                                        | [M+K] <sup>+</sup>  | C17H24O4    | 331.13139                         |                    |                        |                        | 1.2E+05                | -2.3                   |                        |      |
| 983 Cinnamodial                                                                        | [M+Na] <sup>+</sup> | C17H24O5    | 331.15159                         | 1.9E+05            | -1.6                   |                        |                        |                        |                        |      |
| 984 5'-O-beta-D-Glucosylpyridoxine                                                     | [M+H] <sup>+</sup>  | C14H21NO8   | 332.13399                         | 2.4E+05            | -1.9                   |                        |                        |                        |                        |      |
| 985 Megastachine                                                                       | [M+H] <sup>+</sup>  | C20H29NO3   | 332.22188                         |                    |                        |                        | 8.5E+04                | 0.4                    |                        |      |
| 986 Ovalitenin B                                                                       | [M+Na] <sup>+</sup> | C19H18O4    | 333.10918                         |                    |                        |                        |                        | 2.1E+05                | 1.7                    |      |
| 987 Gibberellin A20                                                                    | [M+H] <sup>+</sup>  | C19H24O5    | 333.17003                         |                    |                        | 6.5E+05                | -1.1                   |                        |                        |      |
| 988 Hydroxylinolenic acid                                                              | [M+K] <sup>+</sup>  | C18H30O3    | 333.18265                         | 1.2E+05            | -1.7                   |                        |                        |                        |                        |      |
| 989 9-hydroperoxy-10E,12,15Z-octadecatrienoic acid                                     | [M+Na] <sup>+</sup> | C18H30O4    | 333.20300                         |                    |                        |                        | 8.3E+04                | 1.9                    |                        |      |
| 990 Tintinnadiol                                                                       | [M+H] <sup>+</sup>  | C21H32O3    | 333.24282                         |                    |                        |                        |                        | 1.5E+05                | -1.2                   |      |
| 991 18-hydroxy-9S,10R-dihydroxy-stearic acid                                           | [M+H] <sup>+</sup>  | C18H36O5    | 333.26324                         |                    |                        |                        |                        |                        | 8.0E+04                | 0.9  |
| 992 Spiradine A                                                                        | [M+Na] <sup>+</sup> | C20H25NO2   | 334.17688                         |                    |                        | 1.7E+05                | 2.6                    |                        |                        |      |
| 993 Arabino-galactose                                                                  | [M+Na] <sup>+</sup> | C11H20O10   | 335.09487                         | 1.2E+05            | -0.8                   |                        |                        |                        |                        |      |
| 994 alhpa-tocopheronic acid                                                            | [M+K] <sup>+</sup>  | C16H24O5    | 335.12613                         |                    |                        |                        | 1.2E+05                | -1.8                   | 3.9E+05                | -2.3 |
| 995 Oxo-nonadecanoic acid                                                              | [M+Na] <sup>+</sup> | C19H36O3    | 335.25641                         |                    | 1.7E+05                | -2.2                   |                        |                        |                        |      |
| 996 Palmitoleoyl Ethanolamide                                                          | [M+K] <sup>+</sup>  | C18H35NO2   | 336.22935                         |                    |                        | 2.6E+05                | 1.8                    |                        |                        |      |
| 997 2-amino-14,16-dimethyloctadecan-3-ol                                               | [M+Na] <sup>+</sup> | C20H43NO    | 336.32272                         |                    |                        |                        |                        |                        | 7.2E+04                | 2.9  |
| 998 Epihydroxymugineic acid                                                            | [M+H] <sup>+</sup>  | C12H20N2O9  | 337.12339                         |                    |                        | 1.5E+06                | 2.3                    |                        |                        |      |
| 999 Astrophylline                                                                      | [M+K] <sup>+</sup>  | C19H26N2O   | 337.16767                         | 9.8E+04            | 1.7                    |                        |                        |                        |                        |      |
| 1000 Apovincamine                                                                      | [M+H] <sup>+</sup>  | C21H24N2O2  | 337.19025                         |                    |                        |                        |                        | 3.8E+05                | 2.4                    |      |
| 1001 Octadecanedioic acid                                                              | [M+Na] <sup>+</sup> | C18H34O4    | 337.23532                         |                    | 2.7E+06                | -1.2                   |                        |                        |                        |      |
| 1002 Belladine                                                                         | [M+Na] <sup>+</sup> | C19H25NO3   | 338.17266                         | 1.4E+05            | -2.1                   |                        |                        |                        |                        |      |
| 1003 Pentadecanoylglycine                                                              | [M+K] <sup>+</sup>  | C17H33NO3   | 338.20919                         |                    |                        | 2.8E+05                | 0.0                    |                        |                        |      |
| 1004 Peroxyferolide                                                                    | [M+H] <sup>+</sup>  | C17H22O7    | 339.14283                         |                    |                        | 2.9E+06                | 2.9                    |                        |                        |      |
| 1005 2,3-dihydroxy stearic acid                                                        | [M+Na] <sup>+</sup> | C18H36O4    | 339.25077                         |                    |                        |                        |                        | 1.5E+05                | -0.6                   |      |
| 1006 Ormosanine                                                                        | [M+Na] <sup>+</sup> | C20H35N3    | 340.27158                         |                    |                        |                        | 1.8E+05                | 2.2                    |                        |      |
| 1007 Cellobiono-1,5-lactone                                                            | [M+H] <sup>+</sup>  | C12H20O11   | 341.10784                         | 8.6E+04            | -1.0                   |                        |                        |                        |                        |      |
| 1008 2-Phenethylsulfanyl-5,6,7,8-tetrahydro-benzo[4,5]thieno[2,3-d]pyrimidin-4-ylamine | [M+H] <sup>+</sup>  | C18H19N3S2  | 342.10901                         |                    |                        | 1.9E+05                | 0.9                    |                        |                        |      |
| 1009 Caffeic acid 3-glucoside                                                          | [M+H] <sup>+</sup>  | C15H18O9    | 343.10230                         |                    |                        |                        |                        | 1.0E+05                | 0.2                    |      |
| 1010 Coniferin                                                                         | [M+H] <sup>+</sup>  | C16H22O8    | 343.13874                         | 8.2E+04            | 0.2                    |                        |                        |                        |                        |      |
| 1011 Phellodendrine                                                                    | [M+H] <sup>+</sup>  | C20H24NO4   | 343.17749                         |                    |                        | 9.3E+05                | 0.9                    |                        |                        |      |
| 1012 Arachidonic acid                                                                  | [M+K] <sup>+</sup>  | C20H32O2    | 343.20344                         |                    | 1.3E+05                | -0.1                   |                        |                        |                        |      |



| #    | Putative Annotation <sup>a</sup>                                | Ion                 | Formula     | m/z <sub>Theo.</sub> <sup>b</sup> | R2020 <sup>c</sup> | ppm W2020 <sup>c</sup> | ppm B2020 <sup>c</sup> | ppm R2021 <sup>c</sup> | ppm W2021 <sup>c</sup> | ppm B2021 <sup>c</sup> | ppm  |
|------|-----------------------------------------------------------------|---------------------|-------------|-----------------------------------|--------------------|------------------------|------------------------|------------------------|------------------------|------------------------|------|
| 1013 | 4-Carboxy-4'-sulfoazobenzene                                    | [M+K] <sup>+</sup>  | C13H10N2O5S | 344.99420                         | 8.9E+04            | 1.7                    |                        |                        |                        |                        |      |
| 1014 | Ovalitenin C                                                    | [M+Na] <sup>+</sup> | C19H14O5    | 345.07259                         |                    |                        |                        |                        | 8.6E+04                | 2.2                    |      |
| 1015 | 6-O-alpha-D-Galactosyl-D-glucitol                               | [M+H] <sup>+</sup>  | C12H24O11   | 345.13883                         |                    |                        | 1.9E+05                | 0.9                    |                        |                        |      |
| 1016 | Hydroxyeicosatrienoic acid                                      | [M+Na] <sup>+</sup> | C20H34O3    | 345.24069                         |                    |                        |                        | 2.5E+05                | -2.0                   |                        |      |
| 1017 | 1alpha-hydroxy-22-oxo-23,24,25,26,27-pentano- <i>vitamin D3</i> | [M+H] <sup>+</sup>  | C22H32O3    | 345.24154                         |                    |                        |                        |                        | 2.1E+05                | 2.6                    |      |
| 1018 | Fructose 1,6-bisphosphate                                       | [M+Na] <sup>+</sup> | C6H14O11P2  | 346.99036                         | 8.8E+04            | -2.8                   |                        |                        |                        |                        |      |
| 1019 | Dimethoxy-furanoflavanone                                       | [M+Na] <sup>+</sup> | C19H16O5    | 347.08933                         |                    |                        | 1.1E+05                | -1.0                   |                        |                        |      |
| 1020 | Cinnamodial                                                     | [M+K] <sup>+</sup>  | C17H24O5    | 347.12558                         |                    |                        | 1.2E+05                | -0.1                   |                        |                        |      |
| 1021 | Tetraneurin E                                                   | [M+Na] <sup>+</sup> | C17H24O6    | 347.14668                         |                    |                        |                        | 8.4E+04                | -0.5                   |                        |      |
| 1022 | Gibberellin A24                                                 | [M+H] <sup>+</sup>  | C20H26O5    | 347.18530                         | 1.8E+05            | -1.7                   |                        |                        |                        |                        |      |
| 1023 | 5-(Heptadec-12-enyl)resorcinol                                  | [M+H] <sup>+</sup>  | C23H38O2    | 347.29444                         |                    |                        |                        | 7.1E+04                | 0.1                    |                        |      |
| 1024 | Hydroxysanguinarine                                             | [M+H] <sup>+</sup>  | C20H13NO5   | 348.08665                         | 6.8E+04            | 1.4                    |                        |                        |                        |                        |      |
| 1025 | N-(3-Hydroxy-7-cis-tetradecenoyl)homoserine lactone             | [M+Na] <sup>+</sup> | C18H31NO4   | 348.21437                         |                    |                        |                        |                        | 1.0E+05                | 0.5                    |      |
| 1026 | Carboxy-alpha-chromanol                                         | [M+H] <sup>+</sup>  | C21H31O4    | 348.22874                         |                    |                        | 1.5E+05                | 2.2                    |                        |                        |      |
| 1027 | O-Arachidonoyl Ethanolamine                                     | [M+H] <sup>+</sup>  | C22H37NO2   | 348.28918                         |                    |                        | 1.5E+05                | 1.5                    |                        |                        |      |
| 1028 | Inosinic acid                                                   | [M+H] <sup>+</sup>  | C10H13N4O8P | 349.05438                         | 6.8E+04            | 2.5                    |                        |                        |                        |                        |      |
| 1029 | Calopogoniumisoflavone B                                        | [M+H] <sup>+</sup>  | C21H16O5    | 349.10664                         |                    |                        | 1.3E+05                | 1.2                    |                        |                        |      |
| 1030 | Apigenin 7-sulfate                                              | [M+H] <sup>+</sup>  | C15H10O8S   | 351.01621                         |                    |                        |                        | 8.0E+04                | 2.0                    |                        |      |
| 1031 | Desmosdumotin C                                                 | [M+K] <sup>+</sup>  | C19H20O4    | 351.09932                         | 3.1E+05            | -1.7                   |                        |                        |                        |                        |      |
| 1032 | Jatrophone                                                      | [M+K] <sup>+</sup>  | C20H24O3    | 351.13637                         |                    |                        |                        |                        | 1.3E+05                | -1.9                   |      |
| 1033 | Rhododendrin                                                    | [M+Na] <sup>+</sup> | C16H24O7    | 351.14120                         |                    |                        | 1.5E+06                | 0.6                    |                        |                        |      |
| 1034 | Gibberellin A2                                                  | [M+H] <sup>+</sup>  | C19H26O6    | 351.18064                         |                    |                        | 2.5E+06                | -1.2                   |                        |                        |      |
| 1035 | 9,12,13-trihydroxy-10,15-octadecadienoic acid                   | [M+Na] <sup>+</sup> | C18H32O5    | 351.21389                         |                    |                        |                        | 2.0E+05                | 0.9                    |                        |      |
| 1036 | Coumestrol diacetate                                            | [M+H] <sup>+</sup>  | C19H12O7    | 353.06612                         |                    | 1.6E+05                | -1.5                   |                        |                        |                        |      |
| 1037 | Carnosol                                                        | [M+Na] <sup>+</sup> | C20H26O4    | 353.17290                         |                    |                        |                        | 9.4E+04                | -1.6                   |                        |      |
| 1038 | Jasmolin I                                                      | [M+Na] <sup>+</sup> | C21H30O3    | 353.20872                         | 5.9E+05            | -1.2                   |                        |                        |                        |                        |      |
| 1039 | Geranylgeranylacetone                                           | [M+Na] <sup>+</sup> | C23H38O     | 353.28192                         |                    |                        |                        | 1.4E+05                | -1.2                   |                        |      |
| 1040 | N,N-dimethyl arachidonoyl amine                                 | [M+Na] <sup>+</sup> | C22H37NO    | 354.27633                         |                    | 9.8E+04                | 1.1                    |                        |                        |                        |      |
| 1041 | 8,12,16,19-docosatetraenoic acid                                | [M+Na] <sup>+</sup> | C22H36O2    | 355.26063                         |                    |                        |                        | 3.2E+05                | 0.3                    |                        |      |
| 1042 | Spirasine I                                                     | [M+H] <sup>+</sup>  | C22H29NO3   | 356.22237                         |                    |                        |                        | 1.1E+05                | -1.0                   |                        |      |
| 1043 | Feruloyl-D-glucose                                              | [M+H] <sup>+</sup>  | C16H20O9    | 357.11858                         |                    |                        |                        |                        | 2.2E+05                | -1.6                   |      |
| 1044 | Ubiquinone Q2                                                   | [M+K] <sup>+</sup>  | C19H26O4    | 357.14568                         |                    |                        |                        |                        |                        | 1.2E+05                | 1.6  |
| 1045 | Vinorine                                                        | [M+Na] <sup>+</sup> | C21H22N2O2  | 357.15691                         |                    |                        | 4.8E+05                | 1.2                    |                        |                        |      |
| 1046 | Estradiol valerate                                              | [M+H] <sup>+</sup>  | C23H32O3    | 357.24242                         | 2.7E+05            | -0.8                   |                        |                        |                        |                        |      |
| 1047 | 1-Carbazol-9-yl-3-(3,5-dimethylpyrazol-1-yl)-propan-2-ol        | [M+K] <sup>+</sup>  | C20H21N3O   | 358.13162                         | 6.8E+04            | 2.4                    |                        |                        |                        |                        |      |
| 1048 | Bakankoside                                                     | [M+H] <sup>+</sup>  | C16H23NO8   | 358.15011                         |                    |                        |                        |                        | 1.7E+05                | -1.3                   |      |
| 1049 | Leucyl-leucyl-norleucine                                        | [M+H] <sup>+</sup>  | C18H35N3O4  | 358.27086                         |                    |                        |                        |                        |                        | 1.1E+05                | -2.3 |

| #    | Putative Annotation <sup>a</sup>                                                    | Ion                 | Formula     | m/z <sub>Theo.</sub> <sup>b</sup> | R2020 <sup>c</sup> | ppm W2020 <sup>c</sup> | ppm B2020 <sup>c</sup> | ppm R2021 <sup>c</sup> | ppm W2021 <sup>c</sup> | ppm B2021 <sup>c</sup> | ppm  |
|------|-------------------------------------------------------------------------------------|---------------------|-------------|-----------------------------------|--------------------|------------------------|------------------------|------------------------|------------------------|------------------------|------|
| 1050 | Coumeroic acid                                                                      | [M+H] <sup>+</sup>  | C17H14N2O7  | 359.08714                         |                    |                        |                        |                        |                        | 8.3E+04                | 0.7  |
| 1051 | Docosapentaynoic acid                                                               | [M+K] <sup>+</sup>  | C22H24O2    | 359.14079                         | 7.0E+04            | 1.6                    |                        |                        |                        |                        |      |
| 1052 | Ficine                                                                              | [M+Na] <sup>+</sup> | C20H19NO4   | 360.12063                         | 8.3E+04            | -1.2                   |                        |                        |                        |                        |      |
| 1053 | Thymidylc acid                                                                      | [M+K] <sup>+</sup>  | C10H15N2O8P | 361.01981                         |                    |                        | 1.3E+05                | -0.1                   |                        |                        |      |
| 1054 | Peroxyferolide                                                                      | [M+Na] <sup>+</sup> | C17H22O7    | 361.12507                         |                    |                        | 2.3E+05                | 1.9                    |                        |                        |      |
| 1055 | N-Arachidonoyl glycine                                                              | [M+H] <sup>+</sup>  | C22H35NO3   | 362.26982                         |                    |                        |                        |                        |                        | 8.1E+04                | -2.3 |
| 1056 | 5,7,3'-Trihydroxy-6,4',5'-trimethoxyflavanone                                       | [M+H] <sup>+</sup>  | C18H18O8    | 363.10744                         | 2.1E+05            | 2.2                    |                        |                        |                        |                        |      |
| 1057 | Gibberellin A19                                                                     | [M+H] <sup>+</sup>  | C20H26O6    | 363.18012                         |                    |                        | 1.5E+06                | 0.3                    |                        |                        |      |
| 1058 | Docosanoic acid                                                                     | [M+Na] <sup>+</sup> | C22H44O2    | 363.32371                         |                    |                        |                        | 1.1E+05                | -1.0                   |                        |      |
| 1059 | Lactosamine                                                                         | [M+Na] <sup>+</sup> | C12H23NO10  | 364.12053                         |                    |                        | 2.5E+05                | 2.4                    |                        |                        |      |
| 1060 | PC(0:0/5:0)                                                                         | [M+Na] <sup>+</sup> | C13H28NO7P  | 364.14985                         |                    |                        | 2.5E+05                | -0.8                   |                        |                        |      |
| 1061 | N-Oleoylethanolamine                                                                | [M+K] <sup>+</sup>  | C20H39NO2   | 364.26168                         |                    |                        |                        | 1.7E+05                | -1.2                   |                        |      |
| 1062 | Xanthylic acid                                                                      | [M+H] <sup>+</sup>  | C10H13N4O9P | 365.04974                         |                    |                        |                        |                        |                        | 7.6E+04                | -1.2 |
| 1063 | Lactose                                                                             | [M+Na] <sup>+</sup> | C12H22O11   | 365.10543                         | 3.0E+06            | -1.3                   |                        |                        | 4.2E+05                | 2.0                    |      |
| 1064 | Brosimacutin C                                                                      | [M+Na] <sup>+</sup> | C20H22O5    | 365.13632                         |                    |                        | 9.8E+05                | -1.0                   |                        |                        |      |
| 1065 | Gibberellin A8                                                                      | [M+H] <sup>+</sup>  | C19H24O7    | 365.15901                         |                    |                        |                        |                        |                        | 2.6E+05                | 1.3  |
| 1066 | Gibberellin A37                                                                     | [M+H] <sup>+</sup>  | C20H28O6    | 365.19606                         |                    |                        | 2.1E+06                | -0.5                   |                        |                        |      |
| 1067 | Homophytanic acid                                                                   | [M+K] <sup>+</sup>  | C21H42O2    | 365.28191                         |                    |                        |                        | 1.1E+05                | -0.7                   |                        |      |
| 1068 | PC(O-2:0/2:0)                                                                       | [M+K] <sup>+</sup>  | C12H26NO7P  | 366.10785                         | 4.4E+05            | -1.7                   | 2.1E+05                | 0.3                    |                        |                        |      |
| 1069 | 2-(acetylamino)-1,5-anhydro-2-deoxy-3-O-b-D-galactopyranosyl-D-arabino-Hex-1-enitol | [M+H] <sup>+</sup>  | C14H23NO10  | 366.13961                         |                    |                        | 3.0E+05                | -0.4                   |                        |                        |      |
| 1070 | Dolichyl diphosphate                                                                | [M+Na] <sup>+</sup> | C12H26O7P2  | 367.10460                         | 8.9E+04            | -0.2                   |                        |                        |                        |                        |      |
| 1071 | Deoxyelephantopin                                                                   | [M+Na] <sup>+</sup> | C19H20O6    | 367.11550                         |                    |                        |                        |                        | 8.9E+04                | -0.8                   |      |
| 1072 | Rhododendrin                                                                        | [M+K] <sup>+</sup>  | C16H24O7    | 367.11550                         |                    |                        |                        |                        | 8.9E+04                | -0.4                   |      |
| 1073 | Boschnaloside                                                                       | [M+Na] <sup>+</sup> | C16H24O8    | 367.13570                         |                    |                        | 1.2E+06                | 1.7                    |                        |                        |      |
| 1074 | 12,13-dihydroxy-11-methoxy-9-octadecenoic acid                                      | [M+Na] <sup>+</sup> | C19H36O5    | 367.24605                         |                    |                        |                        |                        |                        | 1.1E+05                | -1.5 |
| 1075 | Prostaglandin G2                                                                    | [M+H] <sup>+</sup>  | C20H32O6    | 369.22747                         |                    |                        |                        |                        | 1.1E+05                | -0.8                   |      |
| 1076 | Mahanimbine                                                                         | [M+K] <sup>+</sup>  | C23H25NO    | 370.15776                         |                    |                        | 2.8E+05                | -2.7                   |                        |                        |      |
| 1077 | Prostaglandin G1                                                                    | [M+H] <sup>+</sup>  | C20H33O6    | 370.23421                         |                    |                        | 2.1E+05                | 2.1                    |                        |                        |      |
| 1078 | Fraxin                                                                              | [M+H] <sup>+</sup>  | C16H18O10   | 371.09736                         |                    |                        |                        |                        | 1.6E+05                | -0.2                   |      |
| 1079 | Leonuridine                                                                         | [M+Na] <sup>+</sup> | C15H24O9    | 371.13116                         |                    |                        |                        |                        |                        | 1.2E+05                | 0.3  |
| 1080 | Carnosic acid                                                                       | [M+K] <sup>+</sup>  | C20H28O4    | 371.16219                         |                    |                        |                        | 2.1E+05                | -0.7                   |                        |      |
| 1081 | Naphthylacetylspermine                                                              | [M+H] <sup>+</sup>  | C22H34N4O   | 371.28066                         |                    |                        |                        |                        |                        | 6.6E+05                | -0.3 |
| 1082 | N-Acetylphenylalanine beta-naphthyl ester                                           | [M+K] <sup>+</sup>  | C21H19NO3   | 372.09965                         | 8.3E+04            | -0.5                   |                        | 8.9E+04                | 1.4                    |                        |      |
| 1083 | Eicosatrienoylethanolamide                                                          | [M+Na] <sup>+</sup> | C22H39NO2   | 372.28808                         |                    |                        |                        | 1.4E+05                | -2.1                   |                        |      |
| 1084 | Calopogoniumisoflavone A                                                            | [M+K] <sup>+</sup>  | C21H18O4    | 373.08367                         | 1.0E+05            | 1.9                    |                        |                        |                        |                        |      |
| 1085 | Cathenamine                                                                         | [M+Na] <sup>+</sup> | C21H22N2O3  | 373.15241                         |                    |                        |                        |                        | 9.2E+04                | -0.4                   |      |
| 1086 | Gingerol                                                                            | [M+Na] <sup>+</sup> | C21H34O4    | 373.23484                         |                    |                        |                        | 4.2E+05                | 0.2                    | 2.0E+05                | -1.9 |
| 1087 | 5,7,4'-Trihydroxyflavanone 7-sulfate                                                | [M+Na] <sup>+</sup> | C15H12O8S   | 375.01451                         | 8.6E+04            | 0.5                    | 9.5E+04                | 0.2                    |                        |                        |      |

| # Putative Annotation <sup>a</sup>                           | Ion                 | Formula    | m/z <sub>Theo.</sub> <sup>b</sup> | R2020 <sup>c</sup> | ppm W2020 <sup>c</sup> | ppm B2020 <sup>c</sup> | ppm R2021 <sup>c</sup> | ppm W2021 <sup>c</sup> | ppm B2021 <sup>c</sup> | ppm  |
|--------------------------------------------------------------|---------------------|------------|-----------------------------------|--------------------|------------------------|------------------------|------------------------|------------------------|------------------------|------|
| 1088 Umbellatine                                             | [M+K] <sup>+</sup>  | C20H18NO4  | 375.08708                         |                    |                        |                        |                        | 1.3E+05                | -0.9                   |      |
| 1089 Myricetin 3,7,3',4'-tetramethyl ether                   | [M+H] <sup>+</sup>  | C19H18O8   | 375.10701                         |                    |                        | 1.8E+05                | 1.2                    |                        |                        |      |
| 1090 Phantomolin                                             | [M+H] <sup>+</sup>  | C21H26O6   | 375.17948                         |                    |                        | 3.1E+05                | 2.0                    |                        |                        |      |
| 1091 Picrasin B                                              | [M+H] <sup>+</sup>  | C21H28O6   | 377.19516                         |                    |                        | 7.6E+05                | 1.9                    |                        |                        |      |
| 1092 Methyl-docosanoic acid                                  | [M+Na] <sup>+</sup> | C23H46O2   | 377.33887                         |                    | 1.2E+05                | 0.3                    |                        |                        |                        |      |
| 1093 Feruloyl-D-glucose                                      | [M+Na] <sup>+</sup> | C16H20O9   | 379.09981                         |                    | 1.1E+05                | 0.4                    |                        |                        |                        |      |
| 1094 gibberellin A17                                         | [M+H] <sup>+</sup>  | C20H26O7   | 379.17455                         |                    |                        | 2.0E+06                | 1.5                    |                        |                        |      |
| 1095 Arachidonoylglycerol                                    | [M+H] <sup>+</sup>  | C23H38O4   | 379.28423                         |                    | 2.3E+05                | 0.1                    |                        |                        |                        |      |
| 1096 Lactosamine                                             | [M+K] <sup>+</sup>  | C12H23NO10 | 380.09536                         | 1.8E+05            | 1.4                    |                        |                        |                        |                        |      |
| 1097 Lactose                                                 | [M+K] <sup>+</sup>  | C12H22O11  | 381.07937                         | 3.9E+06            | -0.4                   |                        |                        |                        |                        |      |
| 1098 Brosimacutin C                                          | [M+K] <sup>+</sup>  | C20H22O5   | 381.11071                         |                    | 2.4E+05                | -2.2                   |                        |                        |                        |      |
| 1099 PA(14:1(9Z)/0:0)                                        | [M+H] <sup>+</sup>  | C17H33O7P  | 381.20344                         |                    |                        |                        | 3.3E+05                | 0.6                    |                        |      |
| 1100 Nogalonic acid                                          | [M+H] <sup>+</sup>  | C20H14O8   | 383.07614                         | 3.3E+05            | -0.5                   | 4.2E+05                | 0.9                    |                        |                        |      |
| 1101 Brosimacutin H                                          | [M+Na] <sup>+</sup> | C20H24O6   | 383.14651                         | 2.1E+05            | -1.9                   |                        |                        |                        |                        |      |
| 1102 1α,23-dihydroxy-24,25,26,27-tetranorvitamin D3          | [M+Na] <sup>+</sup> | C23H36O3   | 383.25547                         |                    | 1.2E+05                | 0.5                    |                        |                        |                        |      |
| 1103 10,11-dihydroxy-4Z,7Z,13Z,16Z,19Z-docosapentaenoic acid | [M+Na] <sup>+</sup> | C22H34O4   | 385.23416                         |                    |                        |                        |                        |                        | 9.9E+04                | 2.0  |
| 1104 MG(0:0/20:1(11Z)/0:0)                                   | [M+H] <sup>+</sup>  | C23H44O4   | 385.33099                         |                    | 1.6E+05                | 0.6                    |                        |                        |                        |      |
| 1105 8-Cinnamoyl-3,4-dihydro-5,7-dihydroxy-4-phenylcoumarin  | [M+H] <sup>+</sup>  | C24H18O5   | 387.12215                         |                    |                        |                        |                        | 8.4E+04                | 1.4                    |      |
| 1106 4-O-beta-D-Glucosyl-sinapate                            | [M+H] <sup>+</sup>  | C17H22O10  | 387.12857                         | 7.0E+04            | -2.3                   |                        |                        |                        |                        |      |
| 1107 DG(18:0e/2:0/0:0)                                       | [M+H] <sup>+</sup>  | C23H46O4   | 387.34742                         |                    |                        |                        |                        | 9.0E+04                | -1.4                   |      |
| 1108 Quassin                                                 | [M+H] <sup>+</sup>  | C22H28O6   | 389.19597                         |                    |                        | 3.3E+05                | -0.3                   | 1.4E+05                | -1.5                   |      |
| 1109 5-Hydroxy-4'-methoxy-6'',6''-dimethylpyrano             | [M+K] <sup>+</sup>  | C21H20O5   | 391.09343                         |                    |                        |                        |                        | 1.3E+05                | 2.1                    |      |
| 1110 Apocholic acid                                          | [M+H] <sup>+</sup>  | C24H38O4   | 391.28520                         |                    | 1.8E+06                | -2.3                   |                        |                        |                        |      |
| 1111 Deoxyvitamin D3                                         | [M+Na] <sup>+</sup> | C27H44     | 391.33349                         |                    |                        | 2.5E+05                | 0.1                    |                        |                        |      |
| 1112 Prostaglandin G1                                        | [M+Na] <sup>+</sup> | C20H33O6   | 392.21693                         | 7.7E+04            | 2.4                    |                        |                        |                        |                        |      |
| 1113 Heteratisine                                            | [M+H] <sup>+</sup>  | C22H33NO5  | 392.24329                         |                    |                        |                        |                        |                        | 1.2E+05                | -0.4 |
| 1114 Chlorogenic acid                                        | [M+K] <sup>+</sup>  | C16H18O9   | 393.05894                         |                    |                        | 4.8E+05                | -1.8                   |                        |                        |      |
| 1115 Fraxin                                                  | [M+Na] <sup>+</sup> | C16H18O10  | 393.07922                         | 1.6E+05            | -0.8                   |                        |                        | 7.2E+05                | 2.1                    |      |
| 1116 Picrasin G                                              | [M+H] <sup>+</sup>  | C21H28O7   | 393.19065                         |                    |                        | 1.5E+06                | 0.3                    |                        |                        |      |
| 1117 Docosanedioic acid                                      | [M+Na] <sup>+</sup> | C22H42O4   | 393.29832                         |                    | 5.2E+05                | -2.0                   |                        |                        |                        |      |
| 1118 Murocholic acid                                         | [M+H] <sup>+</sup>  | C24H40O4   | 393.29994                         | 4.9E+05            | -2.4                   |                        |                        |                        |                        |      |
| 1119 Spirasine I                                             | [M+K] <sup>+</sup>  | C22H29NO3  | 394.17752                         |                    |                        |                        |                        | 1.8E+05                | 1.0                    |      |
| 1120 Syringin                                                | [M+Na] <sup>+</sup> | C17H24O9   | 395.13100                         |                    |                        | 7.4E+05                | 0.6                    |                        |                        |      |
| 1121 3-Geranyl-4,2',4'-trihydroxydihydrochalcone             | [M+H] <sup>+</sup>  | C25H30O4   | 395.22239                         |                    |                        |                        |                        | 1.5E+05                | -1.8                   |      |
| 1122 MG(0:0/18:1(11Z)/0:0)                                   | [M+K] <sup>+</sup>  | C21H40O4   | 395.25582                         | 1.5E+05            | 0.7                    |                        |                        |                        |                        |      |
| 1123 Conessine                                               | [M+K] <sup>+</sup>  | C24H40N2   | 395.28194                         |                    |                        | 4.6E+05                | 0.9                    |                        |                        |      |
| 1124 Phenylaminoadenosine                                    | [M+K] <sup>+</sup>  | C16H18N6O4 | 397.10211                         | 3.4E+05            | 0.3                    |                        |                        |                        |                        |      |

| # Putative Annotation <sup>a</sup>                            | Ion                 | Formula     | m/z <sub>Theo.</sub> <sup>b</sup> | R2020 <sup>c</sup> | ppm W2020 <sup>c</sup> | ppm B2020 <sup>c</sup> | ppm R2021 <sup>c</sup> | ppm W2021 <sup>c</sup> | ppm B2021 <sup>c</sup> | ppm  |
|---------------------------------------------------------------|---------------------|-------------|-----------------------------------|--------------------|------------------------|------------------------|------------------------|------------------------|------------------------|------|
| 1125 Icaceine                                                 | [M+Na] <sup>+</sup> | C22H33NO4   | 398.22933                         |                    |                        | 2.5E+05                | 2.1                    |                        |                        |      |
| 1126 Myricetin 7,3',4'-trimethyl ether                        | [M+K] <sup>+</sup>  | C18H16O8    | 399.04768                         | 1.6E+05            | -0.6                   |                        |                        |                        |                        |      |
| 1127 Calicoferol E                                            | [M+H] <sup>+</sup>  | C27H42O2    | 399.32513                         |                    | 1.1E+05                | 1.6                    |                        |                        |                        |      |
| 1128 5,7,3',4',5'-Pentahydroxy-3,6-dimethoxyflavone           | [M+K] <sup>+</sup>  | C17H14O9    | 401.02607                         |                    |                        | 1.7E+05                | 2.2                    |                        |                        |      |
| 1129 MG(0:0/20:4(8Z,11Z,14Z,17Z)/0:0)                         | [M+Na] <sup>+</sup> | C23H38O4    | 401.26642                         |                    |                        |                        | 3.9E+05                | -0.5                   |                        |      |
| 1130 Xanthylic acid                                           | [M+K] <sup>+</sup>  | C10H13N4O9P | 403.00503                         |                    |                        |                        | 9.8E+04                | 0.4                    |                        |      |
| 1131 Cinn cassiol C1                                          | [M+Na] <sup>+</sup> | C20H28O7    | 403.17243                         |                    |                        | 2.8E+05                | 0.7                    |                        |                        |      |
| 1132 delta-Tocopherol                                         | [M+H] <sup>+</sup>  | C27H46O2    | 403.35706                         | 1.4E+05            | 1.7                    |                        |                        |                        |                        |      |
| 1133 Cinn cassiol C3                                          | [M+Na] <sup>+</sup> | C20H30O7    | 405.18837                         | 1.2E+05            | 1.6                    |                        |                        |                        |                        |      |
| 1134 Alpha-Linoleoylcholine                                   | [M+K] <sup>+</sup>  | C23H44NO2   | 405.30058                         |                    |                        |                        |                        |                        | 1.4E+05                | -0.5 |
| 1135 Pentacosanal                                             | [M+K] <sup>+</sup>  | C25H50O     | 405.35023                         |                    |                        | 3.3E+05                | -2.2                   |                        |                        |      |
| 1136 Rhyncophylline                                           | [M+Na] <sup>+</sup> | C22H28N2O4  | 407.19388                         |                    |                        |                        |                        | 6.8E+05                | 0.6                    |      |
| 1137 Picrasin E                                               | [M+H] <sup>+</sup>  | C22H30O7    | 407.20626                         |                    |                        | 1.5E+06                | 0.4                    |                        |                        |      |
| 1138 MG(0:0/20:1(11Z)/0:0)                                    | [M+Na] <sup>+</sup> | C23H44O4    | 407.31303                         |                    |                        |                        |                        |                        | 8.0E+04                | 0.4  |
| 1139 Ovatine                                                  | [M+Na] <sup>+</sup> | C24H35NO3   | 408.25012                         |                    |                        |                        |                        | 9.7E+04                | 2.0                    |      |
| 1140 Geranylgeranylecysteine                                  | [M+H] <sup>+</sup>  | C23H37NO3S  | 408.25600                         |                    |                        |                        |                        |                        | 7.8E+04                | 1.7  |
| 1141 Isorobustin 4-methyl ether                               | [M+H] <sup>+</sup>  | C23H20O7    | 409.12837                         |                    |                        |                        |                        |                        | 1.6E+05                | -0.5 |
| 1142 Docosanedioic acid                                       | [M+K] <sup>+</sup>  | C22H42O4    | 409.27147                         | 6.3E+05            | -0.7                   |                        |                        |                        |                        |      |
| 1143 Hydroxy-tricosanoic acid                                 | [M+K] <sup>+</sup>  | C23H46O3    | 409.30883                         |                    | 1.6E+05                | -2.4                   |                        |                        |                        |      |
| 1144 Carboxy-gama-tocotrienol                                 | [M+K] <sup>+</sup>  | C23H31O4    | 410.18546                         |                    |                        | 3.0E+05                | -0.2                   |                        |                        |      |
| 1145 N-palmitoyl methionine                                   | [M+Na] <sup>+</sup> | C21H41NO3S  | 410.27008                         |                    |                        | 2.1E+05                | -0.4                   |                        |                        |      |
| 1146 Bensulfuron methyl                                       | [M+H] <sup>+</sup>  | C16H18N4O7S | 411.09690                         | 9.5E+04            | 1.1                    |                        |                        |                        |                        |      |
| 1147 Spinoflavanone A                                         | [M+Na] <sup>+</sup> | C25H24O4    | 411.15745                         |                    |                        |                        | 8.1E+04                | -1.9                   |                        |      |
| 1148 5-Methoxy-7,8-diprenylflavone                            | [M+Na] <sup>+</sup> | C26H28O3    | 411.19273                         |                    |                        |                        |                        |                        | 8.2E+04                | 0.8  |
| 1149 Rehmanioside C                                           | [M+Na] <sup>+</sup> | C19H32O8    | 411.19966                         |                    |                        |                        | 1.4E+05                | -1.8                   |                        |      |
| 1150 Vitamin D6                                               | [M+H] <sup>+</sup>  | C29H46O     | 411.36300                         |                    |                        |                        |                        |                        | 7.2E+04                | -2.1 |
| 1151 Curacin A                                                | [M+K] <sup>+</sup>  | C23H35NOS   | 412.20611                         |                    |                        | 3.6E+05                | 2.4                    |                        |                        |      |
| 1152 N-oleoyl taurine                                         | [M+Na] <sup>+</sup> | C20H39NO4S  | 412.24919                         |                    |                        | 2.0E+05                | 0.0                    |                        |                        |      |
| 1153 11-hydroxy-9,10-dihydrojasmonic acid 11-beta-D-glucoside | [M+Na] <sup>+</sup> | C18H30O9    | 413.17767                         |                    |                        | 7.9E+05                | 1.3                    |                        |                        |      |
| 1154 Apocholic acid                                           | [M+Na] <sup>+</sup> | C24H38O4    | 413.26690                         |                    | 3.2E+06                | -1.6                   |                        |                        | 3.3E+05                | -2.2 |
| 1155 N-stearoyl glutamine                                     | [M+H] <sup>+</sup>  | C23H44N2O4  | 413.33825                         |                    |                        |                        |                        | 6.6E+05                | -2.1                   |      |
| 1156 Hexacosatrienoic acid                                    | [M+Na] <sup>+</sup> | C26H46O2    | 413.33981                         |                    |                        |                        | 1.0E+06                | -2.0                   |                        |      |
| 1157 Hydroxy-hexacosanoic acid                                | [M+H] <sup>+</sup>  | C26H52O3    | 413.39892                         | 2.6E+05            | 2.0                    |                        |                        |                        |                        |      |
| 1158 Anguvin                                                  | [M+Na] <sup>+</sup> | C24H24O5    | 415.15103                         |                    |                        | 3.2E+05                | 1.4                    |                        |                        |      |
| 1159 Phytol phosphate                                         | [M+K] <sup>+</sup>  | C20H41O4P   | 415.23813                         |                    |                        | 3.5E+05                | -1.7                   |                        |                        |      |
| 1160 Lupulone                                                 | [M+H] <sup>+</sup>  | C26H38O4    | 415.28429                         | 1.8E+05            | 1.1                    |                        |                        |                        |                        |      |
| 1161 MG(0:0/22:0/0:0)                                         | [M+H] <sup>+</sup>  | C25H50O4    | 415.37792                         |                    | 1.7E+05                | 0.6                    |                        |                        |                        |      |
| 1162 Spironolactone                                           | [M+H] <sup>+</sup>  | C24H32O4S   | 417.20941                         | 2.2E+05            | -1.6                   |                        |                        |                        |                        |      |

| # Putative Annotation <sup>a</sup>                                     | Ion                 | Formula     | m/z <sub>Theo.</sub> <sup>b</sup> | R2020 <sup>c</sup> | ppm W2020 <sup>c</sup> | ppm B2020 <sup>c</sup> | ppm R2021 <sup>c</sup> | ppm W2021 <sup>c</sup> | ppm B2021 <sup>c</sup> | ppm          |
|------------------------------------------------------------------------|---------------------|-------------|-----------------------------------|--------------------|------------------------|------------------------|------------------------|------------------------|------------------------|--------------|
| 1163 Calcitriol                                                        | [M+H] <sup>+</sup>  | C27H44O3    | 417.33556                         |                    |                        |                        |                        |                        | 5.8E+05                | 1.8          |
| 1164 PGF2alpha isopropyl ester                                         | [M+Na] <sup>+</sup> | C23H40O5    | 419.27699                         |                    |                        |                        |                        | 3.0E+05                | -0.5                   |              |
| 1165 1alpha,25-dihydroxy-22-oxavitamin D3                              | [M+H] <sup>+</sup>  | C26H42O4    | 419.31566                         |                    | 1.3E+05                | -0.2                   |                        |                        | 1.3E+05                | -2.0         |
| 1166 8'-apo-beta-Carotenol                                             | [M+H] <sup>+</sup>  | C30H42O     | 419.33163                         |                    |                        |                        | 1.3E+05                | -1.9                   |                        |              |
| 1167 Hexacosanal                                                       | [M+K] <sup>+</sup>  | C26H52O     | 419.36417                         |                    |                        | 2.5E+05                | 1.9                    |                        |                        |              |
| 1168 Lisetin                                                           | [M+K] <sup>+</sup>  | C21H18O7    | 421.06808                         |                    |                        | 2.8E+05                | 0.8                    |                        |                        |              |
| 1169 N-Benzoyl-D-arginine-4-nitroanilide                               | [M+Na] <sup>+</sup> | C19H22N6O4  | 421.15998                         |                    |                        |                        |                        | 1.0E+05                | -1.2                   |              |
| 1170 C17 Sphingosine-1-phosphate                                       | [M+K] <sup>+</sup>  | C17H39N2O5P | 421.22284                         |                    |                        |                        | 1.1E+06                | -0.1                   |                        |              |
| 1171 8-(2-Carboxy-1-phenylethyl)-3,5,7-trihydroxyflavone delta-lactone | [M+Na] <sup>+</sup> | C24H16O6    | 423.08292                         |                    |                        |                        | 3.7E+05                | 2.3                    |                        |              |
| 1172 Carboxy-alpha-tocotrienol                                         | [M+K] <sup>+</sup>  | C24H33O4    | 424.20155                         |                    |                        |                        | 3.3E+05                | -1.2                   | 1.0E+05                | -2.4         |
| 1173 Myxalamid B                                                       | [M+Na] <sup>+</sup> | C25H39NO3   | 424.28221                         | 2.3E+05            | 0.7                    |                        |                        |                        |                        |              |
| 1174 N-(2-phenoxy-ethyl) arachidonoyl amine                            | [M+H] <sup>+</sup>  | C28H41NO2   | 424.32164                         |                    | 1.3E+05                | -1.5                   |                        |                        | 8.3E+04                | 0.6          |
| 1175 Diferulic acid                                                    | [M+K] <sup>+</sup>  | C20H18O8    | 425.06246                         |                    |                        |                        | 3.9E+05                | 2.0                    |                        |              |
| 1176 delta-Tocopherol                                                  | [M+Na] <sup>+</sup> | C27H46O2    | 425.33807                         |                    |                        |                        | 7.6E+04                | 2.2                    |                        |              |
| 1177 Chitobiose                                                        | [M+H] <sup>+</sup>  | C15H26N2O12 | 427.15601                         |                    | 2.0E+05                | -0.4                   |                        |                        |                        |              |
| 1178 MG(0:0/22:5(4Z,7Z,10Z,13Z,16Z)/0:0)                               | [M+Na] <sup>+</sup> | C25H40O4    | 427.28247                         |                    |                        |                        | 4.5E+05                | -1.4                   |                        |              |
| 1179 Hydroxy-gama-tocotrienol                                          | [M+H] <sup>+</sup>  | C28H42O3    | 427.32021                         |                    |                        |                        | 2.6E+05                | 1.1                    |                        |              |
| 1180 3-Deoxy-3-azido-25-hydroxyvitamin D3                              | [M+H] <sup>+</sup>  | C27H44N3O   | 427.35528                         |                    |                        |                        | 5.1E+05                | 1.0                    |                        |              |
| 1181 Rubraflavone A                                                    | [M+Na] <sup>+</sup> | C25H26O5    | 429.16814                         |                    |                        |                        | 3.4E+05                | -2.1                   |                        |              |
| 1182 Aliarin 4'-methyl ether                                           | [M+H] <sup>+</sup>  | C23H26O8    | 431.16945                         |                    |                        |                        | 2.2E+05                | 1.4                    |                        |              |
| 1183 Dimethamine                                                       | [M+Na] <sup>+</sup> | C24H32N4O2  | 431.24175                         | 5.1E+05            | 1.3                    |                        |                        |                        |                        |              |
| 1184 Cholic acid                                                       | [M+Na] <sup>+</sup> | C24H40O5    | 431.27657                         |                    |                        |                        |                        |                        | 1.8E+05                | 0.5          |
| 1185 Hexacosadienoic acid                                              | [M+K] <sup>+</sup>  | C26H48O2    | 431.32840                         |                    |                        |                        | 1.5E+05                | 0.4                    |                        |              |
| 1186 Dihydroxycampesterol                                              | [M+H] <sup>+</sup>  | C28H46O3    | 431.35277                         |                    |                        |                        |                        | 9.0E+05                | -1.9                   | 5.1E+05 -2.2 |
| 1187 Undecylprodigiosin                                                | [M+K] <sup>+</sup>  | C25H35N3O   | 432.24049                         |                    |                        |                        |                        | 2.0E+05                | 1.6                    |              |
| 1188 Veratramine                                                       | [M+Na] <sup>+</sup> | C27H39NO2   | 432.28730                         | 9.8E+04            | -1.3                   |                        |                        |                        |                        |              |
| 1189 Sphingofungin C                                                   | [M+H] <sup>+</sup>  | C22H41NO7   | 432.29496                         |                    |                        |                        | 6.3E+05                | 1.4                    |                        |              |
| 1190 Quercetin 3,7-dimethyl ether 4'-sulfate                           | [M+Na] <sup>+</sup> | C17H14O10S  | 433.01929                         |                    |                        |                        |                        |                        | 7.7E+04                | 1.6          |
| 1191 Geranyl-4,2',4'-trihydroxydihydrochalcone                         | [M+K] <sup>+</sup>  | C25H30O4    | 433.17852                         |                    |                        |                        | 3.9E+05                | -2.2                   |                        |              |
| 1192 25-hydroxy-16,17,23,23,24,24-hexadehydrovitamin D3                | [M+K] <sup>+</sup>  | C27H38O2    | 433.25129                         |                    |                        |                        |                        | 1.3E+05                | -2.2                   | 8.7E+04 -0.4 |
| 1193 1alpha,25-dihydroxy-24-oxo-22-oxavitamin D3                       | [M+H] <sup>+</sup>  | C26H40O5    | 433.29421                         |                    |                        |                        |                        | 2.5E+05                | 1.5                    |              |
| 1194 Vitamin D6                                                        | [M+Na] <sup>+</sup> | C29H46O     | 433.34309                         |                    |                        |                        | 2.2E+05                | 2.3                    |                        |              |
| 1195 Dalpanol                                                          | [M+Na] <sup>+</sup> | C23H24O7    | 435.14130                         |                    | 1.8E+05                | 0.3                    |                        |                        |                        |              |
| 1196 alpha,4,2'-Trihydroxy-4-O-geranyldihydrochalcone                  | [M+K] <sup>+</sup>  | C24H28O5    | 435.15683                         | 1.0E+05            | -0.4                   |                        |                        |                        |                        |              |
| 1197 (9S,10S)-10-Hydroxy-9-(phosphonoxy)octadecanoate                  | [M+K] <sup>+</sup>  | C18H37O7P   | 435.19131                         |                    |                        |                        |                        |                        | 1.2E+05                | -1.1         |
| 1198 Deoxoteasterone                                                   | [M+H] <sup>+</sup>  | C28H50O3    | 435.38327                         | 8.3E+04            | 0.2                    |                        |                        |                        |                        |              |
| 1199 PC(4:0/4:0)                                                       | [M+K] <sup>+</sup>  | C16H32NO8P  | 436.15005                         |                    |                        |                        |                        | 1.1E+05                | -0.8                   |              |

| #    | Putative Annotation <sup>a</sup>                                        | Ion                 | Formula     | m/z <sub>Theo.</sub> <sup>b</sup> | R2020 <sup>c</sup> | ppm W2020 <sup>c</sup> | ppm B2020 <sup>c</sup> | ppm R2021 <sup>c</sup> | ppm W2021 <sup>c</sup> | ppm B2021 <sup>c</sup> | ppm  |
|------|-------------------------------------------------------------------------|---------------------|-------------|-----------------------------------|--------------------|------------------------|------------------------|------------------------|------------------------|------------------------|------|
| 1200 | (22E,24E)-1alpha,26-dihydroxy-22,23,24,25-tetradehydro-27-norvitamin D3 | [M+K] <sup>+</sup>  | C26H38O3    | 437.24483                         |                    |                        |                        |                        | 3.4E+06                | 1.0                    |      |
| 1201 | Tetracosanedioic acid                                                   | [M+K] <sup>+</sup>  | C24H46O4    | 437.30324                         |                    |                        | 5.2E+05                | -1.1                   |                        |                        |      |
| 1202 | Palmitoylcarnitine                                                      | [M+K] <sup>+</sup>  | C23H45NO4   | 438.29860                         |                    |                        |                        |                        | 2.2E+05                | -1.3                   |      |
| 1203 | Lupinisoflavone J                                                       | [M+K] <sup>+</sup>  | C25H26O7    | 439.17513                         | 1.8E+05            | 1.2                    |                        |                        |                        |                        |      |
| 1204 | PA(18:0/0:0)                                                            | [M+H] <sup>+</sup>  | C21H43O7P   | 439.28126                         |                    |                        |                        | 1.2E+05                | 1.5                    |                        |      |
| 1205 | LysoPE(0:0/15:0)                                                        | [M+H] <sup>+</sup>  | C20H42NO7P  | 440.27652                         |                    |                        |                        |                        | 1.9E+05                | 1.5                    |      |
| 1206 | Carboxy-alpha-chromanol                                                 | [M+Na] <sup>+</sup> | C26H41O4    | 440.28960                         |                    |                        | 2.2E+05                | 0.2                    |                        |                        |      |
| 1207 | Kaempferol 3-arabinopyranoside                                          | [M+Na] <sup>+</sup> | C20H18O10   | 441.07922                         | 2.6E+05            | 0.5                    |                        |                        |                        |                        |      |
| 1208 | Chalconaringenin 2'-xyloside                                            | [M+K] <sup>+</sup>  | C20H20O9    | 443.07389                         | 1.7E+05            | 0.9                    |                        |                        |                        |                        |      |
| 1209 | 4,4'-Diapo-zeta-carotene                                                | [M+K] <sup>+</sup>  | C30H44      | 443.30731                         |                    |                        |                        |                        |                        | 1.1E+05                | 0.3  |
| 1210 | Lepidissipyron                                                          | [M+Na] <sup>+</sup> | C24H22O7    | 445.12677                         |                    |                        | 2.2E+05                | -2.2                   |                        |                        |      |
| 1211 | 1-Octen-3-ol-3-o-beta-D-xylopyranosyl(1->6)-beta-D-glucopyranoside      | [M+Na] <sup>+</sup> | C19H34O10   | 445.20455                         |                    |                        |                        |                        | 2.4E+05                | -0.3                   |      |
| 1212 | Quassin                                                                 | [M+Na] <sup>+</sup> | C23H34O7    | 445.21955                         |                    |                        |                        | 1.2E+05                | 0.3                    |                        |      |
| 1213 | 11alpha-ethyl-1alpha,25-dihydroxyvitamin D3                             | [M+H] <sup>+</sup>  | C29H48O3    | 445.36841                         |                    |                        |                        |                        |                        | 6.5E+05                | -1.8 |
| 1214 | N-oleoyl tyrosine                                                       | [M+H] <sup>+</sup>  | C27H43NO4   | 446.32564                         |                    |                        |                        |                        | 2.7E+05                | 1.9                    |      |
| 1215 | PA(16:1(9Z)/0:0)                                                        | [M+K] <sup>+</sup>  | C19H37O7P   | 447.19178                         |                    |                        | 3.1E+05                | -2.1                   | 1.0E+05                | 1.5                    |      |
| 1216 | PA(8:0/8:0)                                                             | [M+Na] <sup>+</sup> | C19H37O8P   | 447.21137                         |                    |                        |                        |                        |                        | 1.3E+05                | 1.0  |
| 1217 | 2-Geranyl-3,4,2',4'-tetrahydroxydihydrochalcone                         | [M+K] <sup>+</sup>  | C25H30O5    | 449.17164                         |                    |                        |                        |                        | 1.2E+05                | 1.9                    |      |
| 1218 | 1alpha-hydroxy-24-methylvitamin D2                                      | [M+Na] <sup>+</sup> | C29H46O2    | 449.33935                         |                    |                        | 3.5E+05                | -0.8                   |                        |                        |      |
| 1219 | Catechin 3-O-(1-hydroxy-6-oxo-2-cyclohexene-1-carboxylate)              | [M+Na] <sup>+</sup> | C22H20O9    | 451.09999                         |                    |                        | 3.7E+05                | -0.1                   |                        |                        |      |
| 1220 | Tephrocin                                                               | [M+H] <sup>+</sup>  | C25H22O8    | 451.13790                         |                    |                        |                        |                        |                        | 8.7E+04                | 1.9  |
| 1221 | Cinchonin 1a                                                            | [M+H] <sup>+</sup>  | C24H20O9    | 453.11835                         |                    |                        | 5.1E+05                | -0.8                   |                        |                        |      |
| 1222 | 2,2-Dimethyl-3,4-bis(4-methoxyphenyl)-2H-1-benzopyran-7-ol acetate      | [M+Na] <sup>+</sup> | C27H26O5    | 453.16818                         |                    |                        |                        |                        | 2.1E+05                | -2.1                   |      |
| 1223 | Oxo-leukotriene E4                                                      | [M+H] <sup>+</sup>  | C23H34NO6S  | 453.21761                         |                    |                        |                        |                        | 4.6E+05                | 0.8                    |      |
| 1224 | MG(0:0/24:6(6Z,9Z,12Z,15Z,18Z,21Z)/0:0)                                 | [M+Na] <sup>+</sup> | C27H42O4    | 453.29746                         |                    |                        |                        |                        |                        | 1.2E+05                | 0.2  |
| 1225 | Phyllanthin                                                             | [M+K] <sup>+</sup>  | C24H34O6    | 457.19957                         |                    |                        | 5.7E+05                | -1.9                   |                        |                        |      |
| 1226 | Deoxytyphasterol                                                        | [M+Na] <sup>+</sup> | C28H50O3    | 457.36522                         | 1.5E+05            | -2.0                   |                        |                        | 8.0E+05                | 1.5                    |      |
| 1227 | N-(4-benzenesulfonamide) arachidonoyl amine                             | [M+H] <sup>+</sup>  | C26H38N2O3S | 459.26759                         | 1.4E+05            | 0.7                    |                        |                        |                        |                        |      |
| 1228 | Salvisyriacalide                                                        | [M+Na] <sup>+</sup> | C25H40O6    | 459.27091                         |                    |                        |                        | 1.8E+05                | 1.7                    |                        |      |
| 1229 | 1-(3-methylpentadecyl)-3-nonylcyclopentane                              | [M+K] <sup>+</sup>  | C30H60      | 459.43216                         |                    |                        |                        |                        |                        | 2.3E+05                | 1.1  |
| 1230 | Militarinone A                                                          | [M+H] <sup>+</sup>  | C26H37NO6   | 460.27030                         |                    |                        |                        | 9.6E+04                | -2.0                   |                        |      |
| 1231 | N-stearoyl histidine                                                    | [M+K] <sup>+</sup>  | C24H43N3O3  | 460.29344                         |                    |                        | 1.9E+05                | 0.4                    |                        |                        |      |
| 1232 | Apigenin 5,7-dimethyl ether 4'-galactoside                              | [M+H] <sup>+</sup>  | C23H24O10   | 461.14461                         |                    |                        |                        | 9.5E+04                | -0.8                   |                        |      |
| 1233 | PA(P-18:0/0:0)                                                          | [M+K] <sup>+</sup>  | C21H43O6P   | 461.24344                         |                    |                        |                        | 2.1E+05                | -1.2                   |                        |      |
| 1234 | Ophirasterol                                                            | [M+Na] <sup>+</sup> | C31H50O     | 461.37521                         |                    |                        | 2.7E+05                | 0.4                    |                        |                        |      |

| # Putative Annotation <sup>a</sup>                                          | Ion                 | Formula     | m/z <sub>Theo.</sub> <sup>b</sup> | R2020 <sup>c</sup> | ppm W2020 <sup>c</sup> | ppm B2020 <sup>c</sup> | ppm R2021 <sup>c</sup> | ppm W2021 <sup>c</sup> | ppm B2021 <sup>c</sup> | ppm  |
|-----------------------------------------------------------------------------|---------------------|-------------|-----------------------------------|--------------------|------------------------|------------------------|------------------------|------------------------|------------------------|------|
| 1235 Linoelaidyl carnitine                                                  | [M+K] <sup>+</sup>  | C25H45NO4   | 462.29773                         |                    |                        |                        |                        | 1.2E+05                | 0.6                    |      |
| 1236 Flemiflavanone D                                                       | [M+K] <sup>+</sup>  | C25H28O6    | 463.15075                         |                    | 1.4E+05                | 2.2                    |                        |                        |                        |      |
| 1237 Retinyl beta-glucuronide                                               | [M+H] <sup>+</sup>  | C26H38O7    | 463.26933                         |                    |                        |                        |                        |                        | 1.3E+05                | -0.6 |
| 1238 PA(20:2(11Z,14Z)/0:0)                                                  | [M+H] <sup>+</sup>  | C23H43O7P   | 463.28226                         |                    |                        |                        | 1.1E+05                | -0.7                   |                        |      |
| 1239 Pfaffic acid                                                           | [M+Na] <sup>+</sup> | C29H44O3    | 463.31861                         |                    |                        | 3.8E+05                | -0.7                   | 2.4E+05                | 1.2                    |      |
| 1240 1-O-alpha-D-glucopyranosyl-1,2-nonadecandiol                           | [M+H] <sup>+</sup>  | C25H50O7    | 463.36241                         |                    |                        | 3.2E+05                | 1.1                    |                        |                        |      |
| 1241 N-arachidonoyl histidine                                               | [M+Na] <sup>+</sup> | C26H39N3O3  | 464.28830                         |                    | 1.2E+05                | 0.1                    |                        |                        |                        |      |
| 1242 PA(20:1(11Z)/0:0)                                                      | [M+H] <sup>+</sup>  | C23H45O7P   | 465.29770                         |                    |                        | 6.1E+05                | -0.3                   |                        |                        |      |
| 1243 PGF2alpha-dihydroxypropylamine                                         | [M+K] <sup>+</sup>  | C23H41NO6   | 466.25654                         |                    |                        |                        |                        |                        | 8.0E+04                | 0.0  |
| 1244 N-Adenylylanthranilate                                                 | [M+H] <sup>+</sup>  | C17H19N6O8P | 467.10673                         |                    |                        |                        |                        | 2.5E+05                | 1.6                    |      |
| 1245 dihydrophaseic acid 4-O-beta-D-glucoside                               | [M+Na] <sup>+</sup> | C21H32O10   | 467.18870                         |                    |                        |                        |                        |                        | 1.0E+05                | 0.1  |
| 1246 Ercalcitriol                                                           | [M+K] <sup>+</sup>  | C28H44O3    | 467.29219                         |                    | 1.5E+05                | 0.0                    |                        |                        |                        |      |
| 1247 LysoSM(d18:0)                                                          | [M+H] <sup>+</sup>  | C23H51N2O5P | 467.36084                         | 1.1E+05            | 0.6                    |                        |                        |                        |                        |      |
| 1248 Phthioceranic acid                                                     | [M+H] <sup>+</sup>  | C31H62O2    | 467.48226                         | 1.1E+05            | -1.0                   |                        |                        |                        |                        |      |
| 1249 Apigenin 7-glucuronide                                                 | [M+Na] <sup>+</sup> | C21H18O11   | 469.07413                         | 9.7E+04            | -0.2                   |                        |                        |                        |                        |      |
| 1250 1alpha,25-dihydroxy-11-(3-hydroxy-1-propynyl)-9,11-didehydrovitamin D3 | [M+H] <sup>+</sup>  | C30H44O4    | 469.33062                         |                    | 8.2E+05                | 1.3                    |                        |                        |                        |      |
| 1251 Vitamin E                                                              | [M+K] <sup>+</sup>  | C29H50O2    | 469.34405                         |                    |                        | 3.8E+05                | 0.4                    |                        |                        |      |
| 1252 Glutathionylspermidine                                                 | [M+K] <sup>+</sup>  | C17H34N6O5S | 473.19430                         | 8.6E+04            | 1.9                    |                        |                        |                        |                        |      |
| 1253 Euchrenone a14                                                         | [M+H] <sup>+</sup>  | C30H32O5    | 473.23267                         |                    |                        |                        | 1.2E+05                | -0.9                   |                        |      |
| 1254 PA(O-20:0/0:0)                                                         | [M+Na] <sup>+</sup> | C23H49O6P   | 475.31590                         | 1.4E+05            | -1.2                   |                        |                        |                        |                        |      |
| 1255 (20S)-1alpha,25-dihydroxy-20-methoxy-26,27-dimethylvitamin D3          | [M+H] <sup>+</sup>  | C30H50O4    | 475.37906                         |                    |                        |                        |                        |                        | 1.4E+05                | -1.8 |
| 1256 N-docosahexaenoyl phenylalanine                                        | [M+H] <sup>+</sup>  | C31H41NO3   | 476.31676                         |                    |                        |                        |                        |                        | 4.3E+05                | -1.8 |
| 1257 Rhodojaponin IV                                                        | [M+Na] <sup>+</sup> | C24H38O8    | 477.24574                         |                    |                        | 4.3E+05                | 0.3                    |                        |                        |      |
| 1258 Moronic acid                                                           | [M+Na] <sup>+</sup> | C30H46O3    | 477.33379                         |                    |                        |                        | 1.7E+05                | 0.3                    |                        |      |
| 1259 triacontan-1,14-diol                                                   | [M+Na] <sup>+</sup> | C30H62O2    | 477.46344                         |                    |                        |                        |                        |                        | 8.5E+04                | 1.6  |
| 1260 PS(13:0/0:0)                                                           | [M+Na] <sup>+</sup> | C19H38NO9P  | 478.21863                         |                    |                        |                        |                        | 1.4E+05                | -2.1                   |      |
| 1261 PA(20:5(5Z,8Z,11Z,14Z,17Z)/0:0)                                        | [M+Na] <sup>+</sup> | C23H37O7P   | 479.21679                         |                    |                        | 6.8E+05                | 0.3                    |                        |                        |      |
| 1262 Soyasapogenol C                                                        | [M+K] <sup>+</sup>  | C30H48O2    | 479.32838                         |                    |                        |                        |                        | 3.1E+05                | 0.4                    |      |
| 1263 Lythramine                                                             | [M+H] <sup>+</sup>  | C29H37NO5   | 480.27445                         | 1.0E+05            | 1.1                    |                        |                        |                        |                        |      |
| 1264 Exiguaflavanone M                                                      | [M+K] <sup>+</sup>  | C25H30O7    | 481.16245                         |                    | 1.3E+05                | -0.3                   |                        |                        |                        |      |
| 1265 N-palmitoyl tryptophan                                                 | [M+K] <sup>+</sup>  | C27H42N2O3  | 481.28207                         |                    |                        |                        | 4.4E+05                | 1.3                    |                        |      |
| 1266 sn-3-O-(Geranylgeranyl)glycerol 1-phosphate                            | [M+K] <sup>+</sup>  | C23H41O6P   | 483.22682                         |                    |                        |                        |                        | 1.2E+05                | 0.9                    |      |
| 1267 1alpha,25-dihydroxy-24a,24b-didihomo-22-thia-20-epivitamin D3          | [M+Na] <sup>+</sup> | C28H46O3S   | 485.30599                         | 3.1E+05            | 1.9                    |                        |                        |                        |                        |      |
| 1268 S-Decyl GSH                                                            | [M+K] <sup>+</sup>  | C20H37N3O6S | 486.20347                         | 9.1E+04            | -1.1                   |                        |                        |                        |                        |      |
| 1269 Quercitrin                                                             | [M+K] <sup>+</sup>  | C21H20O11   | 487.06372                         | 1.3E+05            | 0.4                    |                        |                        |                        |                        |      |
| 1270 Glucosylgalactosyl hydroxylysine                                       | [M+H] <sup>+</sup>  | C18H34N2O13 | 487.21365                         |                    |                        |                        | 1.2E+05                | -0.6                   |                        |      |

| #    | Putative Annotation <sup>a</sup>                                                          | Ion                 | Formula     | m/z <sub>Theo.</sub> <sup>b</sup> | R2020 <sup>c</sup> | ppm W2020 <sup>c</sup> | ppm B2020 <sup>c</sup> | ppm R2021 <sup>c</sup> | ppm W2021 <sup>c</sup> | ppm B2021 <sup>c</sup> | ppm          |
|------|-------------------------------------------------------------------------------------------|---------------------|-------------|-----------------------------------|--------------------|------------------------|------------------------|------------------------|------------------------|------------------------|--------------|
| 1271 | N-(2'-(4-benzenesulfonamide)-ethyl)arachidonoyl amine                                     | [M+H] <sup>+</sup>  | C28H42N2O3S | 487.29889                         | 4.0E+05            | 0.3                    |                        |                        |                        |                        |              |
| 1272 | Fucosyllactose                                                                            | [M+H] <sup>+</sup>  | C18H32O15   | 489.18087                         |                    |                        | 1.2E+05                | 1.1                    |                        |                        |              |
| 1273 | Vitamin K1 epoxide                                                                        | [M+Na] <sup>+</sup> | C31H46O3    | 489.33309                         |                    |                        | 2.3E+05                | 1.7                    | 1.6E+05                | 0.7                    |              |
| 1274 | 4'-Apo-3,4-didehydrolycopene                                                              | [M+Na] <sup>+</sup> | C35H46      | 489.34972                         |                    |                        |                        |                        |                        | 2.0E+05                | -1.1         |
| 1275 | alpha-Hydroxy-castasterone                                                                | [M+Na] <sup>+</sup> | C28H50O5    | 489.35470                         |                    |                        |                        |                        | 8.9E+05                | 0.7                    |              |
| 1276 | (17E)-1alpha,25-dihydroxy-26,27-dimethyl-17,20,22,22,23,23-hexadehydro-24a-homovitamin D3 | [M+K] <sup>+</sup>  | C30H44O3    | 491.29281                         |                    |                        |                        |                        |                        | 1.2E+05                | -1.2         |
| 1277 | PA(22:2(13Z,16Z)/0:0)                                                                     | [M+H] <sup>+</sup>  | C25H47O7P   | 491.31370                         |                    |                        |                        |                        | 1.3E+05                | -1.0                   |              |
| 1278 | Palmatoside G                                                                             | [M+H] <sup>+</sup>  | C25H32O10   | 493.20683                         |                    |                        |                        |                        | 1.6E+05                | 0.0                    |              |
| 1279 | TG(8:0/8:0/8:0)                                                                           | [M+Na] <sup>+</sup> | C27H50O6    | 493.35001                         |                    |                        | 3.6E+05                | -0.1                   |                        |                        |              |
| 1280 | Eburicoic acid                                                                            | [M+Na] <sup>+</sup> | C31H50O3    | 493.36514                         |                    | 1.8E+05                | 0.2                    |                        |                        |                        |              |
| 1281 | 24R-Ethyl-26,26,27-trimethyl-3beta-hydroxycholesta-7,26-(30)-diene                        | [M+K] <sup>+</sup>  | C32H54O     | 493.38043                         |                    |                        |                        | 1.3E+05                | 0.4                    |                        |              |
| 1282 | 3,5,8,3',4'-Pentamethoxy-7-prenyloxyflavone                                               | [M+K] <sup>+</sup>  | C25H28O8    | 495.14252                         |                    |                        |                        |                        |                        | 8.2E+04                | -1.9         |
| 1283 | Atocalcitol                                                                               | [M+H] <sup>+</sup>  | C32H46O4    | 495.34665                         |                    |                        |                        | 1.1E+05                | 0.5                    |                        |              |
| 1284 | Deoxypumiloside                                                                           | [M+H] <sup>+</sup>  | C26H28N2O8  | 497.19234                         |                    |                        |                        |                        | 1.7E+05                | -1.0                   |              |
| 1285 | Palmitoylglycerophosphocholine                                                            | [M+H] <sup>+</sup>  | C24H51NO7P  | 497.34759                         | 1.7E+05            | 0.6                    |                        |                        |                        |                        |              |
| 1286 | Soyasapogenol A                                                                           | [M+Na] <sup>+</sup> | C30H50O4    | 497.35975                         |                    | 1.6E+05                | 0.8                    |                        |                        |                        |              |
| 1287 | 1alpha,25-dihydroxy-24a-homo-26,27-dimethyl-22-thiavitamin D3                             | [M+Na] <sup>+</sup> | C29H48O3S   | 499.32189                         |                    |                        |                        | 1.2E+05                | -0.5                   |                        |              |
| 1288 | 6-methylvitamin D3 6,19-sulfur dioxide adduct                                             | [M+K] <sup>+</sup>  | C28H46O3S   | 501.27967                         |                    |                        |                        |                        | 2.8E+05                | 0.5                    |              |
| 1289 | LysoPE(0:0/18:1(11Z))                                                                     | [M+Na] <sup>+</sup> | C23H46NO7P  | 502.29130                         |                    |                        |                        |                        | 1.4E+05                | -1.8                   |              |
| 1290 | Cycloheterophyllin                                                                        | [M+H] <sup>+</sup>  | C30H30O7    | 503.20574                         |                    |                        | 2.8E+05                | 1.4                    |                        |                        |              |
| 1291 | Castasterone                                                                              | [M+K] <sup>+</sup>  | C28H48O5    | 503.31323                         |                    |                        |                        |                        | 2.6E+05                | 0.2                    |              |
| 1292 | Hexaprenylphenol                                                                          | [M+H] <sup>+</sup>  | C36H54O     | 503.42541                         |                    |                        |                        |                        |                        | 2.5E+05                | -1.3         |
| 1293 | 3,4,2',3',4',6',alpha-Heptahydroxychalcone 2'-glucoside                                   | [M+Na] <sup>+</sup> | C21H22O13   | 505.09526                         | 1.1E+05            | 0.2                    |                        |                        |                        |                        |              |
| 1294 | 11-beta-hydroxyandrosterone-3-glucuronide                                                 | [M+Na] <sup>+</sup> | C25H38O9    | 505.24041                         |                    |                        |                        |                        | 1.2E+05                | 0.8                    |              |
| 1295 | Eudesobovatol A                                                                           | [M+H] <sup>+</sup>  | C33H44O4    | 505.33212                         |                    |                        |                        |                        | 2.2E+05                | -1.8                   | 1.2E+05 -1.7 |
| 1296 | Methyl-triacontanoic acid                                                                 | [M+K] <sup>+</sup>  | C31H62O2    | 505.43757                         |                    | 1.5E+05                | 1.1                    |                        |                        |                        |              |
| 1297 | Artoindonesianin B                                                                        | [M+K] <sup>+</sup>  | C26H28O8    | 507.14152                         |                    |                        |                        |                        | 1.3E+05                | 0.1                    |              |
| 1298 | Stigmatellin X                                                                            | [M+K] <sup>+</sup>  | C28H38O6    | 509.23029                         |                    |                        | 7.2E+05                | -0.6                   |                        |                        |              |
| 1299 | PA(20:4(5Z,8Z,11Z,14Z)e/2:0)                                                              | [M+Na] <sup>+</sup> | C25H43O7P   | 509.26303                         |                    |                        |                        | 1.4E+05                | 1.6                    |                        |              |
| 1300 | N-(2'-(4-benzenesulfonamide)-ethyl)arachidonoyl amine                                     | [M+Na] <sup>+</sup> | C28H42N2O3S | 509.27994                         |                    | 8.6E+05                | 1.8                    |                        |                        |                        |              |
| 1301 | PS(17:1(9Z)/0:0)                                                                          | [M+H] <sup>+</sup>  | C23H44NO9P  | 510.28265                         | 2.7E+05            | -0.6                   |                        |                        |                        |                        |              |
| 1302 | PS(8:0/8:0)                                                                               | [M+H] <sup>+</sup>  | C22H42NO10P | 512.26285                         |                    | 1.4E+05                | -1.8                   |                        |                        |                        |              |
| 1303 | DG(14:0/14:0/0:0)                                                                         | [M+H] <sup>+</sup>  | C31H60O5    | 513.45084                         |                    |                        |                        |                        |                        | 1.6E+05                | 1.0          |



| # Putative Annotation <sup>a</sup>                                             | Ion                 | Formula       | m/z <sub>Theo.</sub> <sup>b</sup> | R2020 <sup>c</sup> | ppm W2020 <sup>c</sup> | ppm B2020 <sup>c</sup> | ppm R2021 <sup>c</sup> | ppm W2021 <sup>c</sup> | ppm B2021 <sup>c</sup> | ppm  |
|--------------------------------------------------------------------------------|---------------------|---------------|-----------------------------------|--------------------|------------------------|------------------------|------------------------|------------------------|------------------------|------|
| 1304 N-docosahexaenoyl phenylalanine                                           | [M+K] <sup>+</sup>  | C31H41NO3     | 514.27230                         |                    |                        | 2.7E+05                | -1.0                   |                        |                        |      |
| 1305 Taurocholic acid                                                          | [M+H] <sup>+</sup>  | C26H45NO7S    | 516.29925                         |                    |                        | 1.9E+05                | -0.6                   |                        |                        |      |
| 1306 Leukotriene D4                                                            | [M+Na] <sup>+</sup> | C25H40N2O6S   | 519.24952                         |                    |                        | 3.0E+05                | 0.8                    |                        |                        |      |
| 1307 Linoleoylglycerophosphocholine<br>1alpha,22,25-trihydroxy-26,27-dimethyl- | [M+H] <sup>+</sup>  | C26H51NO7P    | 521.34825                         |                    |                        |                        |                        |                        | 1.5E+05                | -1.3 |
| 1308 23,23,24,24-tetradehydro-24a,24b,24c-<br>trihomovitamin D3                | [M+Na] <sup>+</sup> | C32H50O4      | 521.35994                         |                    |                        |                        |                        | 1.4E+05                | 0.4                    |      |
| 1309 Taurodeoxycholic acid                                                     | [M+Na] <sup>+</sup> | C26H45NO6S    | 522.28631                         |                    |                        | 2.2E+05                | -0.6                   |                        |                        |      |
| 1310 Frangulanine                                                              | [M+Na] <sup>+</sup> | C28H44N4O4    | 523.32530                         |                    |                        |                        |                        |                        | 8.7E+04                | 0.3  |
| 1311 Docosanediol-1,14-disulfate                                               | [M+Na] <sup>+</sup> | C22H46O8S2    | 525.25263                         | 1.9E+06            | -1.7                   |                        |                        |                        |                        |      |
| 1312 N-(2'-(4-benzenesulfonamide)-ethyl)<br>arachidonoyl amine                 | [M+K] <sup>+</sup>  | C28H42N2O3S   | 525.25563                         |                    |                        |                        | 1.9E+05                | -1.6                   |                        |      |
| 1313 PG(19:1(9Z)/0:0)                                                          | [M+H] <sup>+</sup>  | C25H49O9P     | 525.31929                         |                    |                        |                        | 3.4E+05                | -1.1                   |                        |      |
| 1314 Retinyl palmitate                                                         | [M+H] <sup>+</sup>  | C36H60O2      | 525.46611                         |                    |                        |                        |                        |                        | 1.3E+05                | 0.9  |
| 1315 6-Hydroxykaempferol 3,5,7,4'-tetramethyl<br>ether 6-rhamnoside            | [M+Na] <sup>+</sup> | C25H28O11     | 527.15296                         |                    |                        |                        |                        |                        | 8.9E+04                | -1.1 |
| 1316 PG(18:3(6Z,9Z,12Z)/0:0)                                                   | [M+Na] <sup>+</sup> | C24H43O9P     | 529.25369                         | 1.1E+05            | -1.2                   |                        |                        |                        |                        |      |
| 1317 Curcumin monoglucoside                                                    | [M+H] <sup>+</sup>  | C27H30O11     | 531.18596                         |                    | 1.4E+05                | 0.2                    |                        |                        |                        |      |
| 1318 Caryoptin                                                                 | [M+K] <sup>+</sup>  | C26H36O9      | 531.19922                         |                    |                        |                        |                        |                        | 1.2E+05                | -0.2 |
| 1319 PI(13:0/0:0)                                                              | [M+H] <sup>+</sup>  | C22H43O12P    | 531.25632                         |                    |                        |                        |                        |                        | 1.4E+05                | 0.3  |
| 1320 Uscharidin                                                                | [M+H] <sup>+</sup>  | C29H38O9      | 531.25956                         |                    | 3.7E+05                | -1.3                   |                        |                        |                        |      |
| 1321 PG(18:2(9Z,12Z)/0:0)                                                      | [M+Na] <sup>+</sup> | C24H45O9P     | 531.26936                         |                    |                        |                        |                        | 4.9E+05                | 0.0                    |      |
| 1322 LysoPC(18:4(6Z,9Z,12Z,15Z))                                               | [M+Na] <sup>+</sup> | C26H46NO7P    | 538.28948                         |                    |                        |                        |                        |                        | 9.7E+04                | 1.7  |
| 1323 zeta-Carotene                                                             | [M+H] <sup>+</sup>  | C40H60        | 541.47656                         |                    |                        |                        |                        |                        | 1.6E+05                | 0.4  |
| 1324 PC(O-16:1(11Z)/2:0)                                                       | [M+Na] <sup>+</sup> | C26H52NO7P    | 544.33736                         | 3.9E+05            | -1.4                   |                        |                        |                        |                        |      |
| 1325 Quercetin 3-(3''-sulfatoglucoside)                                        | [M+H] <sup>+</sup>  | C21H20O15S    | 545.05992                         |                    | 1.4E+05                | -0.6                   |                        |                        |                        |      |
| 1326 Phytoene                                                                  | [M+H] <sup>+</sup>  | C40H64        | 545.50808                         | 2.4E+05            | 0.2                    |                        |                        |                        |                        |      |
| 1327 Guanosine triphosphate                                                    | [M+Na] <sup>+</sup> | C10H16N5O14P3 | 545.98084                         |                    |                        |                        |                        |                        | 2.5E+05                | -1.8 |
| 1328 Hirsutidin 3-glucoside                                                    | [M+K] <sup>+</sup>  | C24H27O12     | 546.11317                         |                    |                        |                        |                        | 4.3E+05                | 0.4                    |      |
| 1329 Deacetylipecoside                                                         | [M+Na] <sup>+</sup> | C25H33NO11    | 546.19426                         |                    |                        |                        | 2.0E+05                | 0.6                    |                        |      |
| 1330 PG(P-20:0/0:0)                                                            | [M+Na] <sup>+</sup> | C26H53O8P     | 547.33686                         |                    |                        |                        |                        | 2.9E+05                | 0.3                    |      |
| 1331 N3'-Acetyltobramycin                                                      | [M+K] <sup>+</sup>  | C20H39N5O10   | 548.23285                         | 1.6E+05            | -1.5                   |                        |                        |                        |                        |      |
| 1332 PS(20:3(8Z,11Z,14Z)/0:0)                                                  | [M+H] <sup>+</sup>  | C26H46NO9P    | 548.29731                         |                    |                        | 1.9E+05                | 1.8                    |                        |                        |      |
| 1333 Cholesteryl-beta-D-glucoside                                              | [M+H] <sup>+</sup>  | C33H56O6      | 549.41497                         | 2.1E+05            | -1.1                   |                        |                        |                        |                        |      |
| 1334 PC(16:0/3:1(2E))                                                          | [M+H] <sup>+</sup>  | C27H52NO8P    | 550.35105                         |                    |                        |                        |                        | 1.4E+05                | -1.3                   |      |
| 1335 L-Oleandrosyl-oleandolide                                                 | [M+Na] <sup>+</sup> | C27H46O10     | 553.29762                         |                    |                        | 6.6E+05                | 1.3                    |                        |                        |      |
| 1336 6,8a-Seco-6,8a-deoxy-5-oxoavermectin "1b"<br>aglycone                     | [M+H] <sup>+</sup>  | C33H46O7      | 555.33163                         | 5.2E+05            | 0.7                    |                        |                        |                        |                        |      |
| 1337 Cucurbitacin F                                                            | [M+K] <sup>+</sup>  | C30H46O7      | 557.28838                         |                    |                        | 4.5E+05                | -1.6                   |                        |                        |      |
| 1338 PC(O-16:0/2:0)                                                            | [M+K] <sup>+</sup>  | C26H54NO7P    | 562.32709                         |                    |                        | 1.8E+05                | -0.3                   |                        |                        |      |

| #    | Putative Annotation <sup>a</sup>                           | Ion                 | Formula       | m/z <sub>Theo.</sub> <sup>b</sup> | R2020 <sup>c</sup> | ppm W2020 <sup>c</sup> | ppm B2020 <sup>c</sup> | ppm R2021 <sup>c</sup> | ppm W2021 <sup>c</sup> | ppm B2021 <sup>c</sup> | ppm  |
|------|------------------------------------------------------------|---------------------|---------------|-----------------------------------|--------------------|------------------------|------------------------|------------------------|------------------------|------------------------|------|
| 1339 | Cortolone-3-glucuronide                                    | [M+Na] <sup>+</sup> | C27H42O11     | 565.26267                         |                    |                        | 4.1E+05                | -1.3                   |                        |                        |      |
| 1340 | dTDP-L-oleandrose                                          | [M+Na] <sup>+</sup> | C17H28N2O14P2 | 569.09121                         |                    | 1.2E+05                | -0.7                   |                        |                        |                        |      |
| 1341 | Sarmentoloside                                             | [M+H] <sup>+</sup>  | C29H44O11     | 569.29595                         |                    |                        | 6.7E+05                | -0.5                   |                        |                        |      |
| 1342 | 12alpha-Hydroxyamoorstatin                                 | [M+K] <sup>+</sup>  | C28H36O10     | 571.19407                         |                    | 1.3E+05                | -0.1                   |                        |                        |                        |      |
| 1343 | 2-Hexaprenyl-6-methoxyphenol                               | [M+K] <sup>+</sup>  | C37H56O2      | 571.39211                         |                    | 1.4E+05                | -1.6                   |                        |                        |                        |      |
| 1344 | Adonitoxigenin 3-O-alpha-L-rhamnoside                      | [M+Na] <sup>+</sup> | C29H42O10     | 573.26772                         |                    |                        |                        |                        |                        | 1.5E+05                | -1.2 |
| 1345 | PI(16:0/0:0)                                               | [M+H] <sup>+</sup>  | C25H49O12P    | 573.30344                         | 1.5E+05            | -0.2                   |                        |                        |                        |                        |      |
| 1346 | beta-Carotene                                              | [M+K] <sup>+</sup>  | C40H56        | 575.40210                         |                    |                        |                        |                        | 5.2E+05                | -1.3                   |      |
| 1347 | PA(P-16:0/12:0)                                            | [M+H] <sup>+</sup>  | C31H61O7P     | 577.42196                         |                    |                        |                        |                        | 7.1E+05                | 1.4                    |      |
| 1348 | Cucurbitacin E                                             | [M+Na] <sup>+</sup> | C32H44O8      | 579.29225                         |                    |                        |                        |                        |                        | 1.1E+05                | 1.0  |
| 1349 | Prorepensin                                                | [M+K] <sup>+</sup>  | C35H44O5      | 583.28185                         |                    |                        | 5.0E+05                | 0.3                    |                        |                        |      |
| 1350 | Ouabain                                                    | [M+H] <sup>+</sup>  | C29H44O12     | 585.29104                         |                    |                        | 4.8E+05                | -0.8                   |                        |                        |      |
| 1351 | Apigenin 7-alpha-L-arabinofuranosyl-(1->6)-glucoside       | [M+Na] <sup>+</sup> | C26H28O14     | 587.13740                         |                    |                        |                        |                        |                        | 1.3E+05                | -0.5 |
| 1352 | PC(10:0/10:0)                                              | [M+Na] <sup>+</sup> | C28H56NO8P    | 588.36358                         | 3.7E+05            | 0.9                    |                        |                        |                        |                        |      |
| 1353 | PC(O-16:0/4:0)                                             | [M+K] <sup>+</sup>  | C28H58NO7P    | 590.35908                         |                    |                        | 1.8E+05                | -1.4                   |                        |                        |      |
| 1354 | Lithocholate 3-O-glucuronide                               | [M+K] <sup>+</sup>  | C30H48O9      | 591.29398                         |                    |                        |                        |                        | 2.8E+05                | -1.7                   |      |
| 1355 | Spheroidene                                                | [M+Na] <sup>+</sup> | C41H60O       | 591.45291                         |                    |                        |                        | 2.7E+05                | 1.2                    |                        |      |
| 1356 | Agavoside A                                                | [M+H] <sup>+</sup>  | C33H52O9      | 593.36912                         |                    |                        |                        |                        |                        | 1.5E+05                | -1.2 |
| 1357 | PI(P-16:0/0:0);                                            | [M+K] <sup>+</sup>  | C25H49O11P    | 595.26456                         |                    |                        |                        |                        |                        | 9.9E+04                | -0.3 |
| 1358 | 7,8-Didehydroastaxanthin                                   | [M+H] <sup>+</sup>  | C40H50O4      | 595.37800                         |                    |                        |                        |                        |                        | 9.7E+04                | 0.3  |
| 1359 | PG(22:4(7Z,10Z,13Z,16Z)/0:0)                               | [M+K] <sup>+</sup>  | C28H49O9P     | 599.27363                         |                    |                        |                        |                        |                        | 1.3E+05                | 1.6  |
| 1360 | PI(18:0/0:0)                                               | [M+H] <sup>+</sup>  | C27H53O12P    | 601.33412                         |                    |                        | 2.7E+05                | 1.0                    |                        |                        |      |
| 1361 | Quercetin 3-rhamnosyl-(1->2)-alpha-L-arabinopyranoside     | [M+Na] <sup>+</sup> | C26H28O15     | 603.13180                         |                    |                        | 1.5E+05                | 0.4                    |                        |                        |      |
| 1362 | alpha,alpha'-Trehalose 6-palmitate                         | [M+Na] <sup>+</sup> | C28H52O12     | 603.33569                         |                    | 1.4E+05                | -1.0                   |                        | 4.7E+05                | -0.7                   |      |
| 1363 | 1-(O-alpha-D-glucopyranosyl)-3-keto-(1,27R)-octacosanediol | [M+H] <sup>+</sup>  | C34H66O8      | 603.48262                         |                    |                        |                        |                        | 4.3E+05                | 0.7                    |      |
| 1364 | 5-Oxoavermectin "1a" aglycone                              | [M+Na] <sup>+</sup> | C34H46O8      | 605.30813                         |                    |                        |                        |                        | 3.2E+05                | 0.6                    |      |
| 1365 | Avermectin B2b aglycone                                    | [M+Na] <sup>+</sup> | C33H48O9      | 611.31880                         |                    |                        | 5.4E+05                | 0.4                    |                        |                        |      |
| 1366 | PC(18:1(9Z)/4:0)                                           | [M+Na] <sup>+</sup> | C30H58NO8P    | 614.37959                         |                    |                        |                        |                        | 2.6E+05                | -0.6                   |      |
| 1367 | Cytidine monophosphate N-acetylneuraminic acid             | [M+H] <sup>+</sup>  | C20H31N4O16P  | 615.15453                         |                    | 2.7E+05                | 0.0                    |                        |                        |                        |      |
| 1368 | PA(P-16:0/12:0)                                            | [M+K] <sup>+</sup>  | C31H61O7P     | 615.37823                         |                    |                        |                        |                        |                        | 1.1E+05                | 0.7  |
| 1369 | CE(14:1(9Z))                                               | [M+Na] <sup>+</sup> | C41H70O2      | 617.52603                         |                    |                        |                        |                        | 1.7E+05                | 1.3                    |      |
| 1370 | Catechin 3-O-rutinoside                                    | [M+Na] <sup>+</sup> | C27H34O15     | 621.17899                         | 1.8E+05            | 1.5                    |                        |                        |                        |                        |      |
| 1371 | Dihydrospirilloxanthin                                     | [M+Na] <sup>+</sup> | C42H62O2      | 621.46388                         |                    |                        |                        | 3.5E+05                | 0.5                    |                        |      |
| 1372 | Rodiasine                                                  | [M+H] <sup>+</sup>  | C38H42N2O6    | 623.31090                         |                    |                        | 5.5E+05                | 1.1                    |                        |                        |      |
| 1373 | Leukotriene C4                                             | [M+H] <sup>+</sup>  | C30H47N3O9S   | 626.30959                         |                    |                        | 2.1E+05                | 1.6                    |                        |                        |      |
| 1374 | Agavoside A                                                | [M+K] <sup>+</sup>  | C33H52O9      | 631.32479                         |                    |                        | 2.7E+05                | -0.8                   |                        |                        |      |

| #    | Putative Annotation <sup>a</sup>                                     | Ion                 | Formula     | m/z <sub>Theo.</sub> <sup>b</sup> | R2020 <sup>c</sup> | ppm W2020 <sup>c</sup> | ppm B2020 <sup>c</sup> | ppm R2021 <sup>c</sup> | ppm W2021 <sup>c</sup> | ppm B2021 <sup>c</sup> | ppm  |
|------|----------------------------------------------------------------------|---------------------|-------------|-----------------------------------|--------------------|------------------------|------------------------|------------------------|------------------------|------------------------|------|
| 1375 | DG(14:0/20:2(11Z,14Z)/0:0)                                           | [M+K] <sup>+</sup>  | C37H68O5    | 631.46994                         |                    | 1.5E+05                | -0.2                   |                        |                        |                        |      |
| 1376 | PA(12:0/19:0)                                                        | [M+H] <sup>+</sup>  | C34H67O8P   | 635.46528                         |                    |                        |                        |                        |                        | 2.3E+05                | -1.0 |
| 1377 | Ansatrienin A                                                        | [M+H] <sup>+</sup>  | C36H48N2O8  | 637.34786                         |                    |                        |                        | 4.0E+05                | 0.8                    |                        |      |
| 1378 | PG(12:0/14:1(9Z))                                                    | [M+H] <sup>+</sup>  | C32H61O10P  | 637.40751                         | 1.5E+05            | 0.7                    |                        |                        |                        |                        |      |
| 1379 | dolichyl beta-D-glucosyl phosphate                                   | [M+K] <sup>+</sup>  | C31H55O9P   | 641.32115                         |                    |                        | 4.5E+05                | 0.6                    |                        |                        |      |
| 1380 | Pentacosanyl oleate                                                  | [M+K] <sup>+</sup>  | C41H80O2    | 643.57905                         |                    |                        |                        | 5.9E+05                | -0.1                   |                        |      |
| 1381 | Rhizochalinin D                                                      | [M+H] <sup>+</sup>  | C35H70N2O8  | 647.52100                         |                    |                        |                        |                        | 5.1E+05                | -0.8                   |      |
| 1382 | 5-O-Methylesteriodictyol 7-glucosyl-(1->4)-galactoside               | [M+Na] <sup>+</sup> | C28H34O16   | 649.17469                         |                    | 1.4E+05                | -1.2                   |                        |                        |                        |      |
| 1383 | PI(20:1(11Z)/0:0)                                                    | [M+Na] <sup>+</sup> | C29H55O12P  | 649.33220                         |                    |                        | 3.3E+05                | 0.2                    |                        |                        |      |
| 1384 | PE(14:0/15:0)                                                        | [M+H] <sup>+</sup>  | C34H68NO8P  | 650.47592                         |                    |                        |                        | 2.0E+05                | -0.6                   |                        |      |
| 1385 | DG(17:2(9Z,12Z)/22:6(4Z,7Z,10Z,13Z,16Z,19Z)/0:0)                     | [M+H] <sup>+</sup>  | C42H66O5    | 651.49923                         |                    | 1.8E+05                | -1.4                   |                        |                        |                        |      |
| 1386 | Hydroxymytiloxanthin                                                 | [M+K] <sup>+</sup>  | C40H54O5    | 653.36084                         |                    |                        |                        |                        | 2.6E+05                | -0.9                   |      |
| 1387 | Hirsutidin 3-O-(6-O-p-coumaroyl)glucoside                            | [M+H] <sup>+</sup>  | C33H33O14   | 654.19431                         | 1.3E+05            | 0.3                    |                        |                        |                        |                        |      |
| 1388 | Cer(d18:1/22:1(13Z))                                                 | [M+K] <sup>+</sup>  | C40H77NO3   | 658.55417                         |                    |                        |                        |                        |                        | 2.9E+05                | -1.0 |
| 1389 | Peonidin 3-(6''-caffeyl)glucoside)                                   | [M+K] <sup>+</sup>  | C31H29O14   | 664.11810                         |                    |                        |                        |                        | 1.3E+05                | 1.2                    |      |
| 1390 | PI(21:0/0:0)                                                         | [M+Na] <sup>+</sup> | C30H59O12P  | 665.36434                         |                    |                        |                        |                        | 2.0E+05                | -1.1                   |      |
| 1391 | PA(12:0/20:2(11Z,14Z))                                               | [M+Na] <sup>+</sup> | C35H65O8P   | 667.42993                         |                    |                        |                        | 1.4E+05                | 1.5                    |                        |      |
| 1392 | DG(15:0/22:4(7Z,10Z,13Z,16Z)/0:0)                                    | [M+K] <sup>+</sup>  | C40H70O5    | 669.48461                         |                    | 1.3E+05                | 1.3                    |                        |                        |                        |      |
| 1393 | SM(d18:0/12:0)                                                       | [M+Na] <sup>+</sup> | C35H73N2O6P | 671.50988                         |                    | 1.5E+05                | -0.1                   |                        |                        |                        |      |
| 1394 | Decaprenoxanthin                                                     | [M+H] <sup>+</sup>  | C50H72      | 673.57059                         |                    |                        |                        |                        |                        | 1.6E+05                | 0.1  |
| 1395 | CerP(d18:1/20:0)                                                     | [M+H] <sup>+</sup>  | C38H76NO6P  | 674.54820                         |                    |                        |                        |                        | 3.1E+05                | 0.2                    |      |
| 1396 | Octaprenylcatechol                                                   | [M+Na] <sup>+</sup> | C46H70O2    | 677.52696                         |                    |                        |                        |                        | 8.0E+05                | -0.2                   |      |
| 1397 | PS(O-16:0/13:0)                                                      | [M+H] <sup>+</sup>  | C35H70NO9P  | 680.48553                         |                    | 1.2E+06                | 0.8                    |                        |                        |                        |      |
| 1398 | DG(16:0/22:5(4Z,7Z,10Z,13Z,16Z)/0:0)                                 | [M+K] <sup>+</sup>  | C41H70O5    | 681.48561                         |                    | 6.0E+05                | -0.2                   |                        |                        |                        |      |
| 1399 | PA(O-20:0/14:1(9Z))                                                  | [M+Na] <sup>+</sup> | C37H73O7P   | 683.49791                         |                    |                        |                        |                        | 1.7E+05                | 1.0                    |      |
| 1400 | Cyanidin 3-(6''-malonylsambubioside)                                 | [M+Na] <sup>+</sup> | C29H31O18   | 690.14065                         |                    | 1.4E+05                | -0.6                   |                        |                        |                        |      |
| 1401 | Diphytanyl-sn-glycerol                                               | [M+K] <sup>+</sup>  | C43H88O3    | 691.63600                         |                    | 1.7E+05                | 0.7                    |                        |                        |                        |      |
| 1402 | Octaprenylcatechol                                                   | [M+K] <sup>+</sup>  | C46H70O2    | 693.50086                         |                    |                        |                        | 2.1E+05                | -0.2                   |                        |      |
| 1403 | PC(10:0/18:2(9Z,12Z))                                                | [M+Na] <sup>+</sup> | C36H68NO8P  | 696.45798                         |                    |                        |                        |                        |                        | 1.3E+05                | -0.7 |
| 1404 | PS(14:1(9Z)/14:1(9Z))                                                | [M+Na] <sup>+</sup> | C34H62NO10P | 698.40080                         |                    | 1.8E+05                | -0.6                   |                        |                        |                        |      |
| 1405 | PE(14:0/16:1(9Z))                                                    | [M+K] <sup>+</sup>  | C35H68NO8P  | 700.43122                         |                    |                        |                        | 1.3E+05                | 0.3                    |                        |      |
| 1406 | PA(13:0/22:6(4Z,7Z,10Z,13Z,16Z,19Z))                                 | [M+Na] <sup>+</sup> | C38H63O8P   | 701.41607                         |                    |                        |                        |                        |                        | 1.2E+05                | -1.1 |
| 1407 | 1-Palmitoyl-2-(5-keto-6-octendioyl)-sn-glycero-3-phosphatidylcholine | [M+K] <sup>+</sup>  | C32H58NO11P | 702.33696                         |                    |                        |                        | 1.1E+05                | 1.3                    |                        |      |
| 1408 | PS(P-16:0/12:0)                                                      | [M+K] <sup>+</sup>  | C34H66NO9P  | 702.41006                         |                    | 1.8E+05                | 0.9                    |                        |                        |                        |      |
| 1409 | Anthenoside A                                                        | [M+Na] <sup>+</sup> | C38H65NO9   | 702.45446                         |                    |                        |                        |                        | 1.6E+05                | 1.0                    |      |
| 1410 | Bruceoside A                                                         | [M+Na] <sup>+</sup> | C32H42O16   | 705.23585                         |                    |                        |                        |                        | 1.3E+05                | 0.9                    |      |
| 1411 | PA(15:0/20:3(8Z,11Z,14Z))                                            | [M+Na] <sup>+</sup> | C38H69O8P   | 707.46170                         |                    |                        |                        | 1.6E+05                | 0.7                    |                        |      |

| # Putative Annotation <sup>a</sup>                                                      | Ion                 | Formula        | m/z <sub>Theo.</sub> <sup>b</sup> | R2020 <sup>c</sup> | ppm W2020 <sup>c</sup> | ppm B2020 <sup>c</sup> | ppm R2021 <sup>c</sup> | ppm W2021 <sup>c</sup> | ppm B2021 <sup>c</sup> | ppm  |
|-----------------------------------------------------------------------------------------|---------------------|----------------|-----------------------------------|--------------------|------------------------|------------------------|------------------------|------------------------|------------------------|------|
| 1412 Kaempferol 3-(6''-sulfatogetiobioside)                                             | [M+Na] <sup>+</sup> | C27H30O19S     | 713.09959                         |                    |                        | 1.2E+05                | -0.2                   |                        |                        |      |
| 1413 DG(21:0/22:5(7Z,10Z,13Z,16Z,19Z)/0:0)                                              | [M+H] <sup>+</sup>  | C46H80O5       | 713.60740                         |                    |                        |                        |                        |                        | 1.0E+05                | 0.6  |
| 1414 PE(14:0/20:2(11Z,14Z))                                                             | [M+H] <sup>+</sup>  | C39H74NO8P     | 716.52248                         | 1.5E+05            | -1.2                   |                        |                        |                        |                        |      |
| 1415 CE(20:1(11Z))                                                                      | [M+K] <sup>+</sup>  | C47H82O2       | 717.59518                         |                    |                        |                        |                        |                        | 2.2E+05                | -0.8 |
| 2',4'-Dihydroxy-6'-methoxy-3'-(2-hydroxybenzyl)-5'-(3 x 2-hydroxybenzyl)dihydrochalcone | [M+Na] <sup>+</sup> | C44H40O8       | 719.26239                         |                    |                        | 1.4E+05                | -1.2                   |                        |                        |      |
| 1417 PA(O-18:0/18:4(6Z,9Z,12Z,15Z))                                                     | [M+K] <sup>+</sup>  | C39H71O7P      | 721.45623                         |                    |                        |                        | 2.3E+05                | 0.9                    |                        |      |
| 1418 PE(18:2(9Z,12Z)/P-18:1(11Z))                                                       | [M+H] <sup>+</sup>  | C41H76NO7P     | 726.54277                         |                    | 2.1E+05                | 0.6                    |                        |                        |                        |      |
| 1419 Chivosazole F                                                                      | [M+K] <sup>+</sup>  | C41H57NO8      | 730.37070                         |                    |                        |                        |                        | 1.3E+05                | 1.2                    |      |
| 1420 Diguanosine diphosphate                                                            | [M+Na] <sup>+</sup> | C20H26N10O15P2 | 731.09465                         | 1.3E+05            | 1.2                    |                        |                        |                        |                        |      |
| 1421 Ubiquinol 8                                                                        | [M+H] <sup>+</sup>  | C49H78O4       | 731.59798                         |                    |                        | 1.0E+05                | -0.9                   |                        |                        |      |
| 1422 PE(15:0/18:4(6Z,9Z,12Z,15Z))                                                       | [M+K] <sup>+</sup>  | C38H68NO8P     | 736.43215                         |                    |                        | 1.2E+05                | -1.0                   |                        |                        |      |
| 1423 PG(O-20:0/14:0)                                                                    | [M+H] <sup>+</sup>  | C40H81O9P      | 737.56969                         |                    | 2.0E+05                | -0.8                   |                        |                        |                        |      |
| 1424 PA(15:0/22:1(11Z))                                                                 | [M+Na] <sup>+</sup> | C40H77O8P      | 739.52510                         |                    |                        |                        |                        |                        | 1.5E+05                | -0.4 |
| 1425 PA(17:1(9Z))                                                                       | [M+H] <sup>+</sup>  | C42H77O8P      | 741.54296                         |                    |                        |                        |                        | 1.3E+05                | -0.1                   |      |
| 1426 PI(12:0/14:1(9Z))                                                                  | [M+Na] <sup>+</sup> | C35H65O13P     | 747.40624                         |                    |                        |                        |                        | 1.6E+05                | -1.0                   |      |
| 1427 PA(O-20:0/20:0)                                                                    | [M+H] <sup>+</sup>  | C43H87O7P      | 747.62622                         | 9.1E+04            | 0.0                    |                        |                        |                        |                        |      |
| 1428 PC(o-16:0/18:0)                                                                    | [M+H] <sup>+</sup>  | C42H86NO7P     | 748.62215                         |                    |                        |                        |                        | 1.3E+05                | -0.9                   |      |
| 1429 Quercetin 3-(2'''-galloylglucosyl)-(1->2)-alpha-L-arabinofuranoside                | [M+H] <sup>+</sup>  | C33H32O20      | 749.15558                         |                    |                        | 1.5E+05                | 0.5                    |                        |                        |      |
| 1430 PG(O-18:0/17:0)                                                                    | [M+H] <sup>+</sup>  | C41H83O9P      | 751.58485                         |                    |                        |                        | 3.0E+05                | -0.1                   |                        |      |
| 1431 PE(20:2(11Z,14Z))                                                                  | [M+H] <sup>+</sup>  | C43H80NO7P     | 754.57533                         |                    |                        |                        |                        | 1.2E+05                | -1.1                   |      |
| 1432 DG(22:4(7Z,10Z,13Z,16Z)/24:1(15Z)/0:0)                                             | [M+H] <sup>+</sup>  | C49H86O5       | 755.65443                         |                    |                        |                        | 1.5E+05                | 0.5                    |                        |      |
| 1433 PC(10:0/22:0)                                                                      | [M+Na] <sup>+</sup> | C40H80NO8P     | 756.55091                         |                    |                        |                        |                        |                        | 1.1E+05                | 0.6  |
| 1434 PC(14:0/20:1(11Z))                                                                 | [M+H] <sup>+</sup>  | C42H82NO8P     | 760.58508                         | 1.7E+05            | -0.8                   |                        |                        |                        |                        |      |
| 1435 Ophiopogonin B                                                                     | [M+K] <sup>+</sup>  | C39H62O12      | 761.38729                         | 1.7E+05            | 0.7                    |                        |                        |                        |                        |      |
| 1436 Malvidin 3-O-(6-O-(4-O-malonyl-alpha-rhamnopyranosyl)-beta-glucopyranoside         | [M+K] <sup>+</sup>  | C32H37O19      | 764.15606                         | 8.4E+05            | -1.0                   |                        |                        |                        |                        |      |
| 1437 Lampranthin II                                                                     | [M+K] <sup>+</sup>  | C34H34N2O16    | 765.15436                         |                    |                        |                        |                        |                        | 1.5E+05                | -0.5 |
| 1438 PG(P-16:0/18:4(6Z,9Z,12Z,15Z))                                                     | [M+K] <sup>+</sup>  | C40H71O9P      | 765.44669                         |                    |                        | 1.2E+05                | 0.1                    |                        |                        |      |
| 1439 Quercetin 3-(2'''-galloylglucosyl)-(1->2)-alpha-L-arabinofuranoside                | [M+Na] <sup>+</sup> | C33H32O20      | 771.13789                         |                    |                        | 8.3E+04                | 0.0                    |                        |                        |      |
| 1440 Myxochromide S3                                                                    | [M+Na] <sup>+</sup> | C40H56N6O8     | 771.40430                         |                    |                        | 1.2E+05                | 1.1                    |                        |                        |      |
| 1441 PA(17:2(9Z,12Z))                                                                   | [M+K] <sup>+</sup>  | C42H71O8P      | 773.45132                         |                    |                        |                        |                        | 1.6E+05                | 0.6                    |      |
| 1442 Loropetalin D                                                                      | [M+Na] <sup>+</sup> | C35H28O19      | 775.11186                         |                    |                        | 6.2E+04                | -0.2                   |                        |                        |      |
| 1443 PI(12:0/18:4(6Z,9Z,12Z,15Z))                                                       | [M+H] <sup>+</sup>  | C39H67O13P     | 775.43844                         |                    |                        |                        |                        | 1.3E+05                | 1.0                    |      |
| 1444 2-Methyl-6-solanyl-1,4-benzoquinol                                                 | [M+K] <sup>+</sup>  | C52H80O2       | 775.57968                         |                    |                        | 5.8E+04                | -0.9                   |                        |                        |      |
| 1445 PG(14:0/20:5(5Z,8Z,11Z,14Z,17Z))                                                   | [M+K] <sup>+</sup>  | C40H69O10P     | 779.42646                         |                    |                        |                        |                        |                        | 1.5E+05                | -0.6 |
| 1446 PC(14:0/20:1(11Z))                                                                 | [M+Na] <sup>+</sup> | C42H82NO8P     | 782.56703                         | 6.1E+05            | -0.1                   |                        |                        |                        |                        |      |

| # Putative Annotation <sup>a</sup>                                                          | Ion                 | Formula        | m/z <sub>Theo.</sub> <sup>b</sup> | R2020 <sup>c</sup> | ppm W2020 <sup>c</sup> | ppm B2020 <sup>c</sup> | ppm R2021 <sup>c</sup> | ppm W2021 <sup>c</sup> | ppm B2021 <sup>c</sup> | ppm  |
|---------------------------------------------------------------------------------------------|---------------------|----------------|-----------------------------------|--------------------|------------------------|------------------------|------------------------|------------------------|------------------------|------|
| 1447 PA(O-18:0/22:1(11Z))                                                                   | [M+K] <sup>+</sup>  | C43H85O7P      | 783.56652                         |                    |                        |                        |                        |                        | 1.1E+05                | -0.1 |
| 1448 PC(O-16:0/19:0)                                                                        | [M+Na] <sup>+</sup> | C43H88NO7P     | 784.61933                         |                    |                        |                        |                        |                        | 1.2E+05                | -0.3 |
| 1449 PA(20:0/22:1(11Z))                                                                     | [M+H] <sup>+</sup>  | C45H87O8P      | 787.62147                         |                    |                        |                        |                        | 1.4E+05                | -0.4                   |      |
| 1450 PA(20:4)/(22:6)                                                                        | [M+Na] <sup>+</sup> | C45H69O8P      | 791.46314                         |                    |                        |                        |                        |                        | 9.6E+04                | -1.2 |
| Quercetin 7-methyl ether 3-[3-hydroxy-3-methylglutaryl-(1->6)]-[apiosyl-(1->2)-galactoside] | [M+K] <sup>+</sup>  | C33H38O20      | 793.15866                         |                    |                        |                        |                        | 1.3E+05                | 0.2                    |      |
| 1452 PG(15:0/20:3(8Z,11Z,14Z))                                                              | [M+K] <sup>+</sup>  | C41H75O10P     | 797.47294                         | 1.5E+05            | 0.8                    |                        |                        |                        |                        |      |
| 1453 MGDG(18:2(9Z,12Z)/18:3(9Z,12Z,15Z))                                                    | [M+Na] <sup>+</sup> | C45H76O10      | 799.53266                         |                    |                        |                        |                        |                        | 8.8E+04                | 0.5  |
| 1454 PS(15:0/20:3(8Z,11Z,14Z))                                                              | [M+K] <sup>+</sup>  | C41H74NO10P    | 810.46737                         |                    |                        |                        | 1.4E+05                | 1.0                    |                        |      |
| 1455 GalCer(d18:2/23:0)                                                                     | [M+Na] <sup>+</sup> | C47H89NO8      | 818.64804                         | 1.2E+05            | 1.2                    |                        |                        |                        |                        |      |
| 1456 Thalicoside A                                                                          | [M+Na] <sup>+</sup> | C42H70O14      | 821.46641                         |                    |                        |                        |                        | 1.1E+05                | -0.8                   |      |
| 1457 GalCer(d18:0/22:0)                                                                     | [M+K] <sup>+</sup>  | C46H91NO8      | 824.63808                         |                    |                        |                        |                        |                        | 1.7E+05                | -0.5 |
| 1458 Yiamoloside B                                                                          | [M+H] <sup>+</sup>  | C43H68O15      | 825.46292                         |                    |                        |                        |                        | 1.8E+05                | 0.2                    |      |
| 1459 PA(21:0/22:0)                                                                          | [M+Na] <sup>+</sup> | C46H91O8P      | 825.63437                         |                    |                        |                        | 1.9E+05                | 0.0                    |                        |      |
| 1460 TG(16:0/16:1(9Z)/16:1(9Z))                                                             | [M+Na] <sup>+</sup> | C51H94O6       | 825.69420                         |                    | 6.6E+05                | 0.1                    |                        |                        |                        |      |
| 1461 TG(16:1(9Z)/16:1(9Z)/16:1(9Z))                                                         | [M+K] <sup>+</sup>  | C51H92O6       | 839.65286                         |                    |                        |                        |                        | 1.5E+05                | -0.4                   |      |
| 1462 PG(17:2(9Z,12Z)/22:6(4Z,7Z,10Z,13Z,16Z,19Z))                                           | [M+K] <sup>+</sup>  | C45H73O10P     | 843.45784                         |                    |                        |                        |                        | 1.7E+05                | -0.7                   |      |
| 1463 Acetyl coenzyme A                                                                      | [M+K] <sup>+</sup>  | C23H38N7O17P3S | 848.08874                         |                    |                        |                        |                        | 1.0E+05                | 0.2                    |      |
| 1464 TG(16:1(9Z)/16:1(9Z)/20:5(5Z,8Z,11Z,14Z,17Z))                                          | [M+H] <sup>+</sup>  | C55H92O6       | 849.69590                         |                    |                        |                        |                        |                        | 1.6E+05                | 0.9  |
| 1465 Chrysoeriol 7-(2'''-feruloylglucuronosyl)-(1->2)-glucuronide                           | [M+Na] <sup>+</sup> | C38H36O21      | 851.16422                         |                    |                        |                        |                        | 1.1E+05                | -0.1                   |      |
| 1466 PG(O-18:0/22:1(11Z))                                                                   | [M+K] <sup>+</sup>  | C46H91O9P      | 857.60291                         |                    |                        |                        | 5.2E+04                | 0.4                    |                        |      |
| 1467 PI(O-16:0/19:1(9Z))                                                                    | [M+Na] <sup>+</sup> | C44H85O12P     | 859.56732                         |                    |                        |                        | 1.1E+05                | -0.3                   |                        |      |
| 1468 TG(17:2(9Z,12Z))                                                                       | [M+Na] <sup>+</sup> | C54H92O6       | 859.67769                         |                    |                        |                        |                        | 9.5E+04                | 1.1                    |      |
| 1469 PI(16:0/20:2(11Z,14Z))                                                                 | [M+H] <sup>+</sup>  | C45H83O13P     | 863.56377                         |                    |                        |                        | 1.2E+05                | 0.7                    |                        |      |
| 1470 PG(20:4(5Z,8Z,11Z,14Z))                                                                | [M+Na] <sup>+</sup> | C48H75O10P     | 865.49899                         |                    |                        |                        |                        | 1.1E+05                | 0.0                    |      |
| 1471 PG(22:4(7Z,10Z,13Z,16Z))                                                               | [M+Na] <sup>+</sup> | C48H77O10P     | 867.51495                         |                    |                        |                        |                        | 1.4E+05                | -0.3                   |      |
| 1472 TG(17:1(9Z)/18:1(9Z)/18:1(9Z))                                                         | [M+H] <sup>+</sup>  | C56H102O6      | 871.77588                         |                    |                        |                        | 1.5E+05                | -1.1                   |                        |      |
| 1473 PG(19:1(9Z)/22:2(13Z,16Z))                                                             | [M+K] <sup>+</sup>  | C47H87O10P     | 881.56685                         | 1.1E+05            | -0.7                   |                        |                        |                        |                        |      |
| 1474 TG(16:0/18:1(9Z)/20:4(5Z,8Z,11Z,14Z))                                                  | [M+H] <sup>+</sup>  | C57H100O6      | 881.75927                         | 1.8E+05            | 0.5                    | 1.9E+06                | -0.7                   |                        |                        |      |
| 1475 PI(16:0/20:2(11Z,14Z))                                                                 | [M+Na] <sup>+</sup> | C45H83O13P     | 885.54568                         |                    |                        |                        |                        | 9.7E+04                | 0.8                    |      |
| 1476 PG(22:6(4Z,7Z,10Z,13Z,16Z,19Z))                                                        | [M+Na] <sup>+</sup> | C50H79O10P     | 893.53108                         |                    |                        |                        |                        | 1.3E+05                | -0.9                   |      |
| 1477 TG(17:2(9Z,12Z)/18:0/18:0)                                                             | [M+Na] <sup>+</sup> | C56H104O6      | 895.77239                         |                    |                        |                        |                        | 8.1E+04                | 0.1                    |      |
| 1478 TG(18:3(9Z,12Z,15Z))                                                                   | [M+H] <sup>+</sup>  | C59H94O6       | 899.71292                         |                    |                        |                        |                        | 8.5E+04                | -0.7                   |      |
| 1479 TG(17:1/20:5/20:5)                                                                     | [M+H] <sup>+</sup>  | C60H94O6       | 911.71274                         |                    |                        |                        |                        |                        | 1.5E+05                | -0.5 |
| 1480 3-O-Sulfogalactosylceramide                                                            | [M+Na] <sup>+</sup> | C48H91NO11S    | 912.62065                         |                    |                        |                        | 5.5E+04                | -0.2                   |                        |      |
| 1481 TG(16:0/18:1/20:4)                                                                     | [M+K] <sup>+</sup>  | C57H100O6      | 919.71482                         |                    | 3.1E+06                | 0.4                    |                        |                        |                        |      |
| 1482 PC(22:4/24:0)                                                                          | [M+H] <sup>+</sup>  | C54H100NO8P    | 922.72690                         |                    | 1.4E+06                | -1.0                   |                        |                        |                        |      |
| 1483 Cassiaside B2                                                                          | [M+Na] <sup>+</sup> | C39H52O25      | 943.26946                         |                    |                        |                        | 7.1E+04                | -0.5                   |                        |      |

| #    | Putative Annotation <sup>a</sup>                                                                      | Ion                 | Formula    | m/z <sub>Theo.</sub> <sup>b</sup> | R2020 <sup>c</sup> | ppm W2020 <sup>c</sup> | ppm B2020 <sup>c</sup> | ppm R2021 <sup>c</sup> | ppm W2021 <sup>c</sup> | ppm B2021 <sup>c</sup> | ppm |
|------|-------------------------------------------------------------------------------------------------------|---------------------|------------|-----------------------------------|--------------------|------------------------|------------------------|------------------------|------------------------|------------------------|-----|
| 1484 | Delphinidin 3,3'-di-glucoside-5-(6-caffeoylglucoside)                                                 | [M+H] <sup>+</sup>  | C42H47O25  | 952.24853                         |                    |                        | 5.7E+04                | -0.6                   |                        |                        |     |
| 1485 | PI(19:0/22:1(11Z))                                                                                    | [M+Na] <sup>+</sup> | C50H95O13P | 957.64122                         |                    |                        | 5.7E+04                | -1.0                   |                        |                        |     |
| 1486 | TG(17:2/20:5/22:4)                                                                                    | [M+Na] <sup>+</sup> | C62H98O6   | 961.72556                         | 1.4E+05            | 0.3                    |                        |                        |                        |                        |     |
| 1487 | TG(18:2(9Z,12Z)/20:1(11Z)/20:4(5Z,8Z,11Z,14Z))                                                        | [M+K] <sup>+</sup>  | C61H104O6  | 971.74713                         |                    | 2.1E+05                | -0.7                   |                        |                        |                        |     |
| 1488 | 1-O-[(6'-O-hexadecanoyl)-α-D-glucopyranosyl]-<br>(2-hexadecanoyloxy)-eicosan-1-ol                     | [M+Na] <sup>+</sup> | C58H112O9  | 975.81998                         |                    | 1.5E+05                | -0.1                   |                        |                        |                        |     |
| 1489 | Malvidin 3-O-(6-O-(4-O-feruloyl-α-<br>rhamnopyranosyl)-β-D-glucopyranoside)-5-<br>β-D-glucopyranoside | [M+H] <sup>+</sup>  | C45H53O24  | 978.30085                         |                    |                        | 8.4E+04                | -0.9                   |                        |                        |     |
| 1490 | D-Mannosylphosphodecaprenol                                                                           | [M+K] <sup>+</sup>  | C56H93O9P  | 979.61813                         |                    | 2.0E+05                | 0.8                    |                        |                        |                        |     |
| 1491 | Magnoloside C                                                                                         | [M+K] <sup>+</sup>  | C41H56O25  | 987.27493                         |                    |                        | 9.3E+04                | -0.7                   |                        |                        |     |

<sup>a</sup> CE Cholesteryl ester; Cer Ceramide; Galcer Galactosylceramide; DG Diacylglycerol; MG Monoacylglycerol; MGDG Monogalactosyldiacylglycerol; PA Phosphatidic acid; PC Phosphatidylcholine; PE Phosphatidylethanolamine; PG Glycerophospholipids; PGF2 Prostaglandin F2; PI Phosphatidylinositol; PS Phosphatidylserine; SM Sphingomyelin; TG Triacylglycerol.

<sup>b</sup> Theoretical mass

<sup>c</sup> R stands for red tunica, W stands for white tunica and B stands for bulb.

**Table S7: Untargeted metabolic profiling of *Sulmona red garlic* hydroalcoholic extracts by ESI(-) FT-ICR MS**

| # Putative Annotation <sup>a</sup> | Ion     | Formula  | m/z <sub>Theo.</sub> <sup>b</sup> | R2020 <sup>c</sup> | ppm W2020 <sup>c</sup> | ppm B2020 <sup>c</sup> | ppm R2021 <sup>c</sup> | ppm W2021 <sup>c</sup> | ppm B2021 <sup>c</sup> | ppm  |
|------------------------------------|---------|----------|-----------------------------------|--------------------|------------------------|------------------------|------------------------|------------------------|------------------------|------|
| 1 Pyruvic acid                     | [M-H]-  | C3H4O3   | 87.00812                          |                    |                        | 3.4E+04                | 4.7                    |                        |                        |      |
| 2 Butyric acid                     | [M-H]-  | C4H8O2   | 87.04546                          |                    |                        |                        |                        |                        | 6.9E+04                | -3.5 |
| 3 Pentanol                         | [M-H]-  | C5H12O   | 87.08154                          | 6.3E+04            | 3.7                    |                        |                        |                        |                        |      |
| 4 2-Propyn-1-al                    | [M+Cl]- | C3H2O    | 88.98055                          |                    |                        | 3.7E+04                | -2.1                   |                        |                        |      |
| 5 Propanethial S-oxide             | [M-H]-  | C3H6OS   | 89.00663                          |                    |                        | 2.9E+04                | 0.3                    |                        |                        |      |
| 6 1,3-Butadiene                    | [M+Cl]- | C4H6     | 89.01609                          |                    |                        | 2.9E+04                | 2.9                    |                        |                        |      |
| 7 Diethyl sulfide                  | [M-H]-  | C4H10S   | 89.04343                          |                    |                        |                        |                        |                        | 8.1E+04                | -4.3 |
| 8 3-Aminopropane-1,2-diol          | [M-H]-  | C3H9NO2  | 90.05639                          |                    |                        |                        | 5.0E+04                | -3.8                   |                        |      |
| 9 Thioglycolate                    | [M-H]-  | C2H4O2S  | 90.98537                          |                    |                        | 2.9E+04                | 1.6                    |                        |                        |      |
| 10 Dimethyl sulfone                | [M-H]-  | C2H6O2S  | 93.00157                          | 6.2E+04            | 1.7                    |                        |                        |                        | 8.1E+04                | 0.8  |
| 11 Thiocyanate                     | [M+Cl]- | CHNS     | 93.95237                          |                    | 8.2E+04                | 0.9                    |                        |                        |                        |      |
| 12 Hexadienal                      | [M-H]-  | C6H8O    | 95.05029                          |                    |                        | 4.1E+04                | -0.5                   |                        |                        |      |
| 13 Carbamic acid                   | [M+Cl]- | CH3NO2   | 95.98567                          |                    |                        |                        |                        | 5.3E+04                | 1.2                    |      |
| 14 Maleimide                       | [M-H]-  | C4H3NO2  | 96.00910                          |                    | 8.2E+04                | 2.9                    |                        |                        |                        |      |
| 15 Ethanolamine                    | [M+Cl]- | C2H7NO   | 96.02217                          |                    | 4.6E+04                | -2.8                   |                        |                        |                        |      |
| 16 Beta-vinyl acrylic acid         | [M-H]-  | C5H6O2   | 97.02883                          |                    |                        | 3.0E+04                | 4.8                    |                        |                        |      |
| 17 Succinimide                     | [M-H]-  | C4H5NO2  | 98.02475                          |                    | 9.3E+04                | 2.8                    |                        |                        |                        |      |
| 18 Piperidinone                    | [M-H]-  | C5H9NO   | 98.06144                          |                    |                        | 3.2E+04                | -3.1                   |                        |                        |      |
| 19 Tiglic acid                     | [M-H]-  | C5H8O2   | 99.04515                          | 7.0E+04            | 2.6                    |                        |                        |                        | 8.3E+04                | 4.0  |
| 20 Aminocyclopropane-carboxylate   | [M-H]-  | C4H7NO2  | 100.04040                         | 5.4E+04            | -2.2                   |                        |                        |                        |                        |      |
| 21 Succinate semialdehyde          | [M-H]-  | C4H6O3   | 101.02442                         | 1.2E+05            | -0.5                   | 6.8E+04                | -4.8                   |                        | 1.2E+05                | 4.6  |
| 22 Betaine aldehyde                | [M-H]-  | C5H12NO  | 101.08511                         |                    |                        |                        |                        | 5.6E+04                | -4.9                   |      |
| 23 Imidazole                       | [M+Cl]- | C3H4N2   | 103.00694                         |                    |                        |                        |                        |                        | 6.6E+04                | -0.9 |
| 24 Choline                         | [M-H]-  | C5H14NO  | 103.10052                         |                    |                        |                        |                        | 3.4E+04                | -2.5                   |      |
| 25 S-Methylthioglycolate           | [M-H]-  | C3H6O2S  | 105.00119                         |                    |                        |                        | 4.7E+04                | 3.7                    |                        |      |
| 26 Glyceric acid                   | [M-H]-  | C3H6O4   | 105.01976                         |                    |                        |                        | 4.1E+04                | -4.1                   |                        |      |
| 27 N-Methylaniline                 | [M-H]-  | C7H9N    | 106.06652                         |                    |                        | 3.2E+04                | -2.8                   |                        |                        |      |
| 28 2-Methylpropanamine             | [M+Cl]- | C4H11N   | 108.05855                         |                    | 3.5E+04                | 0.5                    |                        |                        |                        |      |
| 29 Furoic acid                     | [M-H]-  | C5H4O3   | 111.00877                         | 7.4E+04            | 4.3                    |                        |                        |                        |                        |      |
| 30 Allyl sulfide                   | [M-H]-  | C6H10S   | 113.04358                         |                    |                        |                        | 4.5E+04                | -4.7                   |                        |      |
| 31 Octane                          | [M-H]-  | C8H18    | 113.13405                         |                    |                        | 2.9E+04                | -4.2                   |                        |                        |      |
| 32 Pyridine                        | [M+Cl]- | C5H5N    | 114.01204                         |                    |                        | 2.4E+04                | -3.9                   |                        |                        |      |
| 33 Methylthiopropionic acid        | [M-H]-  | C4H8O2S  | 119.01745                         |                    |                        |                        |                        |                        | 5.5E+04                | -1.9 |
| 34 3-Methyl-2-butenal              | [M+Cl]- | C5H8O    | 119.02746                         |                    |                        |                        | 3.0E+04                | -4.6                   |                        |      |
| 35 D-Erythrose                     | [M-H]-  | C4H8O4   | 119.03498                         |                    | 4.0E+04                | 2.1                    |                        |                        |                        |      |
| 36 Purine                          | [M-H]-  | C5H4N4   | 119.03599                         |                    |                        |                        |                        | 6.6E+04                | 2.8                    |      |
| 37 Cysteine                        | [M-H]-  | C3H7NO2S | 120.01247                         | 4.9E+04            | -4.8                   |                        |                        |                        |                        |      |
| 38 Piperidine                      | [M+Cl]- | C5H11N   | 120.05881                         |                    |                        |                        |                        |                        | 3.9E+04                | -2.2 |
| 39 1,4-Lactone                     | [M+Cl]- | C4H6O2   | 121.00618                         | 5.0E+04            | -4.3                   |                        |                        |                        |                        |      |

| # Putative Annotation <sup>a</sup> | Ion     | Formula   | m/z <sub>Theo.</sub> <sup>b</sup> | R2020 <sup>c</sup> | ppm W2020 <sup>c</sup> | ppm B2020 <sup>c</sup> | ppm R2021 <sup>c</sup> | ppm W2021 <sup>c</sup> | ppm B2021 <sup>c</sup> | ppm  |
|------------------------------------|---------|-----------|-----------------------------------|--------------------|------------------------|------------------------|------------------------|------------------------|------------------------|------|
| 40 Nicotinamide                    | [M-H]-  | C6H6N2O   | 121.04046                         |                    |                        | 3.8E+04                | 2.3                    |                        |                        |      |
| 41 Sulfoacetaldehyde               | [M-H]-  | C2H4O4S   | 122.97575                         | 5.9E+04            | 0.6                    |                        |                        |                        |                        |      |
| 42 Selenocysteine                  | [M+Cl]- | C3H6NO2Se | 123.00894                         |                    |                        |                        |                        |                        | 9.0E+05                | 2.6  |
| 43 2,4-octadienal                  | [M-H]-  | C8H12O    | 123.08154                         | 7.5E+04            | -1.6                   |                        |                        |                        |                        |      |
| 44 Taurine                         | [M-H]-  | C2H7NO3S  | 124.00739                         |                    | 5.3E+04                | 2.0                    |                        |                        |                        |      |
| 45 Maltol                          | [M-H]-  | C6H6O3    | 125.02375                         |                    |                        |                        | 4.2E+04                | 3.7                    |                        |      |
| 46 Dihydrophloroglucinol           | [M-H]-  | C6H8O3    | 127.03966                         |                    |                        |                        | 2.7E+04                | 3.2                    |                        |      |
| 47 L-Lysine 1,6-lactam             | [M-H]-  | C6H12N2O  | 127.08775                         |                    |                        |                        |                        |                        | 4.8E+04                | -0.5 |
| 48 Aniline                         | [M+Cl]- | C6H7N     | 128.02733                         |                    |                        |                        | 3.3E+04                | -0.6                   |                        |      |
| 49 Guanidinobutanal                | [M-H]-  | C5H11N3O  | 128.08251                         |                    |                        | 2.9E+04                | 3.3                    |                        |                        |      |
| 50 Octylamine                      | [M-H]-  | C8H19N    | 128.14381                         |                    |                        | 4.1E+04                | 4.8                    |                        |                        |      |
| 51 Dimethyl valeric acid           | [M-H]-  | C7H14O2   | 129.09293                         |                    |                        |                        |                        | 4.2E+04                | -3.1                   |      |
| 52 2-Hydroxypyridine               | [M+Cl]- | C5H5NO    | 130.00652                         |                    | 5.9E+04                | -1.5                   |                        |                        |                        |      |
| 53 Hydroxy-L-proline               | [M-H]-  | C5H9NO3   | 130.05097                         | 6.7E+04            | 0.3                    |                        |                        |                        |                        |      |
| 54 4-Guanidino-1-butanol           | [M-H]-  | C5H13N3O  | 130.09763                         |                    |                        | 4.9E+04                | 4.8                    |                        |                        |      |
| 55 Furfural                        | [M+Cl]- | C5H4O2    | 130.99053                         | 3.8E+04            | -1.5                   |                        |                        |                        |                        |      |
| 56 Oxalacetic acid                 | [M-H]-  | C4H4O5    | 130.99856                         |                    |                        |                        |                        |                        | 3.7E+04                | 0.3  |
| 57 Pteridine                       | [M-H]-  | C6H4N4    | 131.03613                         |                    |                        |                        | 2.4E+04                | 1.5                    | 5.2E+04                | -3.7 |
| 58 Asparagine                      | [M-H]-  | C4H8N2O3  | 131.04622                         |                    | 8.0E+04                | 2.4                    |                        |                        |                        |      |
| 59 Aspartic acid                   | [M-H]-  | C4H7NO4   | 132.03023                         | 3.4E+04            | -3.0                   |                        |                        |                        |                        |      |
| 60 Ureidoglycine                   | [M-H]-  | C3H7N3O3  | 132.04232                         |                    |                        |                        |                        |                        | 4.9E+04                | -2.7 |
| 61 Hydroxyindole                   | [M-H]-  | C8H7NO    | 132.04580                         |                    |                        | 2.7E+04                | -2.4                   |                        |                        |      |
| 62 Malic acid                      | [M-H]-  | C4H6O5    | 133.01389                         |                    |                        |                        | 3.5E+04                | 2.7                    |                        |      |
| 63 Imidazole-4-methanol            | [M+Cl]- | C4H6N2O   | 133.01672                         |                    |                        |                        |                        | 1.3E+05                | 5.2                    |      |
| 64 Cinnamyl alcohol                | [M-H]-  | C9H10O    | 133.06589                         |                    | 9.7E+04                | 0.3                    |                        |                        |                        |      |
| 65 2-Phenylacetamide               | [M-H]-  | C8H9NO    | 134.06114                         |                    | 5.8E+04                | -1.0                   |                        |                        |                        |      |
| 66 Caproaldehyde                   | [M+Cl]- | C6H12O    | 135.05822                         | 5.0E+04            | 2.5                    |                        |                        |                        |                        |      |
| 67 Hydroxypurine                   | [M-H]-  | C5H6N4O   | 137.04627                         |                    |                        | 3.7E+04                | 4.5                    |                        |                        |      |
| 68 Hexan-1-ol                      | [M+Cl]- | C6H14O    | 137.07387                         | 5.0E+04            | 0.3                    |                        |                        |                        |                        |      |
| 69 Cadaverine                      | [M+Cl]- | C5H14N2   | 137.08433                         |                    |                        |                        |                        | 3.8E+04                | 2.7                    |      |
| 70 Malonic acid                    | [M+Cl]- | C3H4O4    | 138.98036                         | 5.2E+04            | 4.5                    |                        |                        |                        |                        |      |
| 71 5-Phenyl-1,3-pentadiyne         | [M-H]-  | C11H8     | 139.05589                         |                    |                        | 4.9E+04                | -4.1                   |                        |                        |      |
| 72 Methylthiopropylamine           | [M+Cl]- | C4H11NS   | 140.03090                         |                    |                        |                        |                        | 3.2E+04                | -2.0                   |      |
| 73 Muconic acid                    | [M-H]-  | C6H6O4    | 141.01869                         |                    |                        |                        |                        | 3.3E+04                | 4.6                    |      |
| 74 4-Oxocyclohexanecarboxylate     | [M-H]-  | C7H10O3   | 141.05572                         |                    | 6.1E+04                | 1.3                    |                        |                        |                        |      |
| 75 Octenoic acid                   | [M-H]-  | C8H14O2   | 141.09210                         | 4.1E+04            | 3.0                    |                        |                        |                        |                        |      |
| 76 Pyridine-3-aldehyde             | [M+Cl]- | C6H5NO    | 142.00618                         |                    |                        |                        |                        |                        | 7.0E+04                | 2.4  |
| 77 Quinone                         | [M+Cl]- | C6H4O2    | 142.98986                         |                    |                        |                        | 3.2E+04                | 4.7                    |                        |      |
| 78 n-valeryl acetic acid           | [M-H]-  | C7H12O3   | 143.07108                         |                    |                        |                        | 2.5E+04                | 2.0                    |                        |      |
| 79 Dehydroxycarnitine              | [M-H]-  | C7H15NO2  | 144.10336                         |                    |                        |                        | 2.8E+04                | -2.5                   |                        |      |



| # Putative Annotation <sup>a</sup>             | Ion     | Formula   | m/z <sub>Theo.</sub> <sup>b</sup> | R2020 <sup>c</sup> | ppm W2020 <sup>c</sup> | ppm B2020 <sup>c</sup> | ppm R2021 <sup>c</sup> | ppm W2021 <sup>c</sup> | ppm B2021 <sup>c</sup> | ppm         |
|------------------------------------------------|---------|-----------|-----------------------------------|--------------------|------------------------|------------------------|------------------------|------------------------|------------------------|-------------|
| 80 Resorcinol                                  | [M+Cl]- | C6H6O2    | 145.00701                         |                    |                        |                        |                        |                        | 3.8E+04                | -2.5        |
| 81 Oxoglutarate                                | [M-H]-  | C5H6O5    | 145.01425                         | 9.3E+04            | -4.7                   |                        |                        |                        |                        |             |
| 82 Coumarin                                    | [M-H]-  | C9H6O2    | 145.03000                         |                    |                        | 1.7E+05                | -3.4                   |                        |                        |             |
| 83 Glutamine                                   | [M-H]-  | C5H10N2O3 | 145.06193                         |                    |                        |                        |                        | 4.4E+04                | -0.4                   |             |
| 84 Cytosine                                    | [M+Cl]- | C4H5N3O   | 146.01266                         | 8.3E+04            | -4.9                   | 2.7E+04                | -4.8                   |                        |                        |             |
| 85 Dihydroxyfumarate                           | [M-H]-  | C4H4O6    | 146.99351                         |                    | 5.7E+04                | -1.8                   |                        |                        |                        |             |
| 86 Heptenal                                    | [M+Cl]- | C7H12O    | 147.05904                         |                    |                        | 2.4E+04                | -4.6                   |                        |                        |             |
| 87 1-Pyrroline-2-carboxylate                   | [M+Cl]- | C5H7NO2   | 148.01644                         |                    |                        | 1.9E+05                | 4.3                    |                        |                        |             |
| 88 threo-3-Hydroxy-L-aspartate                 | [M-H]-  | C4H7NO5   | 148.02450                         |                    |                        |                        | 2.8E+04                | 4.4                    |                        |             |
| 89 epsilon-Caprolactam                         | [M+Cl]- | C6H11NO   | 148.05336                         |                    |                        | 4.8E+04                | 0.7                    |                        |                        |             |
| 90 Phenylglyoxylic acid                        | [M-H]-  | C8H6O3    | 149.02427                         |                    |                        |                        |                        | 4.3E+04                | 1.0                    | 3.0E+04 2.4 |
| 91 Dipropyl disulfide                          | [M-H]-  | C6H14S2   | 149.04642                         | 6.2E+04            | -4.9                   |                        |                        |                        |                        |             |
| 92 3-Amino-2-piperidone                        | [M+Cl]- | C5H10N2O  | 149.04815                         |                    |                        |                        |                        | 1.4E+05                | 3.8                    |             |
| 93 Sulfinyipyruvic acid                        | [M-H]-  | C3H3O5S   | 149.96284                         | 3.4E+04            | -0.9                   |                        |                        |                        |                        |             |
| 94 Sulfinyipyruvic acid                        | [M-H]-  | C3H3O5S   | 149.96357                         |                    |                        | 2.9E+04                | -4.8                   |                        |                        |             |
| 95 6-Imino-5-oxocyclohexa-1,3-dienecarboxylate | [M-H]-  | C7H5NO3   | 150.01967                         | 4.4E+04            | -2.8                   |                        |                        |                        |                        |             |
| 96 N3-Metyladenine                             | [M-H]-  | C6H9N5    | 150.07852                         |                    | 7.4E+04                | 1.0                    | 4.5E+04                | 1.1                    |                        |             |
| 97 Fumaric acid                                | [M+Cl]- | C4H4O4    | 150.98052                         |                    |                        | 4.7E+04                | -1.1                   |                        |                        |             |
| 98 Sulfinoalanine                              | [M-H]-  | C3H6NO4S  | 150.99448                         | 4.0E+04            | -4.0                   |                        |                        |                        |                        |             |
| 99 Arabitol                                    | [M-H]-  | C5H12O5   | 151.06120                         | 7.1E+04            | 4.5                    |                        |                        |                        |                        |             |
| 100 5-Aminopentanamide                         | [M+Cl]- | C5H12N2O  | 151.06436                         |                    | 4.5E+04                | 1.0                    |                        |                        |                        |             |
| 101 Myrtenol                                   | [M-H]-  | C10H16O   | 151.11381                         |                    |                        | 3.5E+04                | -4.0                   |                        |                        |             |
| 102 N-(4,6-diaminopyrimidin-5-yl)formamide     | [M-H]-  | C5H7N5O   | 152.05812                         |                    |                        | 4.0E+04                | -2.2                   |                        |                        |             |
| 103 Oxomalonate                                | [M+Cl]- | C3H2O5    | 152.95962                         |                    | 6.3E+04                | 0.7                    |                        |                        |                        |             |
| 104 Imidazole pyruvic acid                     | [M-H]-  | C6H6N2O3  | 153.03057                         | 3.2E+04            | -0.8                   | 1.7E+04                | -3.3                   |                        |                        |             |
| 105 Diaminobutyric acid                        | [M+Cl]- | C4H10N2O2 | 153.04462                         |                    |                        | 3.1E+04                | -4.6                   |                        |                        |             |
| 106 S-Acetylthioethanolamine                   | [M+Cl]- | C4H9NOS   | 154.00989                         |                    | 1.0E+05                | 1.3                    |                        |                        |                        |             |
| 107 Nitrocatechol                              | [M-H]-  | C6H5NO4   | 154.01458                         | 3.7E+04            | 1.2                    |                        |                        |                        |                        |             |
| 108 Histidine                                  | [M-H]-  | C6H9N3O2  | 154.06220                         | 8.0E+04            | -4.9                   |                        |                        |                        |                        |             |
| 109 Dimethylsulfonioacetate                    | [M+Cl]- | C4H9O2S   | 156.00125                         |                    |                        |                        |                        | 1.1E+05                | 3.1                    |             |
| 110 Selenocysteine seleninic acid              | [M+Cl]- | C3H7NO4Se | 156.00662                         |                    |                        | 4.0E+04                | 1.9                    |                        |                        |             |
| 111 Phenylethylamine                           | [M+Cl]- | C8H11N    | 156.05885                         |                    |                        |                        |                        |                        | 2.8E+04                | -1.9        |
| 112 Mercaptolactic acid                        | [M+Cl]- | C3H6O3S   | 156.97303                         |                    |                        |                        | 3.4E+04                | 0.9                    |                        |             |
| 113 Nicotinamide                               | [M+Cl]- | C6H6N2O   | 157.01713                         |                    |                        | 2.7E+04                | 1.8                    |                        |                        |             |
| 114 Allantoin                                  | [M-H]-  | C4H6N4O3  | 157.03721                         |                    |                        |                        | 3.4E+04                | -3.2                   |                        |             |
| 115 (+)-6-methyl caprylic acid                 | [M-H]-  | C9H18O2   | 157.12340                         |                    | 4.2E+04                | -2.2                   |                        |                        |                        |             |
| 116 Guaiacol                                   | [M+Cl]- | C7H8O2    | 159.02183                         | 7.3E+04            | 1.0                    |                        |                        |                        |                        |             |
| 117 Pimelic acid                               | [M-H]-  | C7H12O4   | 159.06628                         | 8.4E+04            | -0.3                   |                        |                        |                        | 4.2E+04                | -4.4        |
| 118 D-Alanyl-D-alanine                         | [M-H]-  | C6H12N2O3 | 159.07848                         |                    |                        |                        |                        | 1.4E+05                | -4.8                   |             |
| 119 Hydroxy-L-glutamic acid                    | [M-H]-  | C5H7NO5   | 160.02542                         | 3.1E+04            | -1.7                   |                        |                        |                        |                        |             |

| # Putative Annotation <sup>a</sup>             | Ion     | Formula    | m/z <sub>Theo.</sub> <sup>b</sup> | R2020 <sup>c</sup> | ppm W2020 <sup>c</sup> | ppm B2020 <sup>c</sup> | ppm R2021 <sup>c</sup> | ppm W2021 <sup>c</sup> | ppm B2021 <sup>c</sup> | ppm  |
|------------------------------------------------|---------|------------|-----------------------------------|--------------------|------------------------|------------------------|------------------------|------------------------|------------------------|------|
| 120 gamma-Coniceine                            | [M+Cl]- | C8H15N     | 160.08986                         |                    |                        |                        | 3.6E+04                | -0.1                   |                        |      |
| 121 Safrole                                    | [M-H]-  | C10H10O2   | 161.05984                         |                    |                        | 7.0E+04                | 4.9                    |                        |                        |      |
| 122 Oleandrose                                 | [M-H]-  | C7H14O4    | 161.08232                         |                    |                        |                        |                        |                        | 2.9E+04                | -2.4 |
| 123 3-Methyldioxyindole                        | [M-H]-  | C9H9NO2    | 162.05663                         |                    |                        |                        |                        | 1.7E+04                | -3.6                   |      |
| 124 Octanal                                    | [M+Cl]- | C8H16O     | 163.08873                         |                    |                        |                        |                        | 2.7E+04                | 4.8                    |      |
| 125 Goitrin                                    | [M+Cl]- | C5H7NOS    | 163.99351                         |                    |                        |                        |                        | 2.1E+04                | 4.4                    |      |
| 126 Methionine S-oxide                         | [M-H]-  | C5H11NO3S  | 164.03943                         |                    |                        |                        | 3.4E+04                | -4.5                   |                        |      |
| 127 D-Pipecolic acid                           | [M+Cl]- | C6H11NO2   | 164.04838                         |                    | 5.2E+04                | -0.5                   |                        |                        |                        |      |
| 128 Cucurbitine                                | [M+Cl]- | C5H10N2O2  | 165.04338                         |                    |                        |                        |                        | 4.2E+04                | 1.5                    |      |
| 129 Agmatine                                   | [M+Cl]- | C5H14N4    | 165.09131                         |                    |                        |                        |                        |                        | 9.8E+04                | -0.4 |
| 130 4-Trimethylammoniobutanol                  | [M+Cl]- | C7H16NO    | 165.09323                         |                    |                        |                        |                        | 3.5E+04                | -3.9                   |      |
| 131 Iminoaspartate                             | [M+Cl]- | C4H5NO4    | 165.99126                         |                    | 7.2E+04                | 2.4                    |                        |                        |                        |      |
| 132 Dihydroxyadenine                           | [M-H]-  | C5H5N5O2   | 166.03668                         |                    |                        |                        |                        |                        | 3.0E+04                | 2.2  |
| 133 Guanidinopropanoate                        | [M+Cl]- | C4H9N3O2   | 166.03888                         | 5.2E+04            | -4.9                   |                        | 7.4E+04                | 5.0                    |                        |      |
| 134 N-Carbamoylputrescine                      | [M+Cl]- | C5H13N3O   | 166.07554                         |                    |                        |                        | 2.2E+04                | -1.7                   |                        |      |
| 135 2-Dimethylamino-5,6-dimethylpyrimidin-4-ol | [M-H]-  | C8H13N3O   | 166.09917                         |                    |                        |                        |                        |                        | 7.4E+04                | -3.5 |
| 136 Oxaluric acid                              | [M+Cl]- | C3H4N2O4   | 166.98570                         |                    |                        |                        |                        | 1.7E+04                | 4.8                    |      |
| 137 Glutaric acid                              | [M+Cl]- | C5H8O4     | 167.01156                         |                    |                        |                        |                        | 1.7E+04                | 0.6                    |      |
| 138 Aspartic acid                              | [M+Cl]- | C4H7NO4    | 168.00723                         |                    |                        |                        |                        | 1.5E+04                | -1.9                   |      |
| 139 Piperidione                                | [M-H]-  | C9H15NO2   | 168.10376                         |                    |                        |                        |                        |                        | 2.2E+04                | -4.5 |
| 140 Dodecane                                   | [M-H]-  | C12H26     | 169.19617                         |                    | 3.1E+04                | -1.0                   |                        |                        |                        |      |
| 141 Decanamide                                 | [M-H]-  | C10H21NO   | 170.15471                         |                    |                        |                        |                        | 1.8E+04                | 1.9                    |      |
| 142 Methylerythritol                           | [M+Cl]- | C5H12O4    | 171.04364                         |                    |                        |                        |                        | 2.6E+04                | -4.0                   |      |
| 143 Capric acid                                | [M-H]-  | C10H20O2   | 171.13905                         | 2.5E+05            | 1.6                    |                        | 1.0E+05                | 2.1                    |                        |      |
| 144 Trigonelline                               | [M+Cl]- | C7H7NO2    | 172.01722                         |                    |                        |                        |                        |                        | 4.8E+04                | -0.8 |
| 145 Quinaldic acid                             | [M-H]-  | C10H7NO2   | 172.03969                         |                    |                        |                        | 2.0E+04                | 4.1                    |                        |      |
| 146 N-Acetyl-L-leucine                         | [M-H]-  | C8H15NO3   | 172.09799                         |                    |                        |                        |                        |                        | 2.3E+04                | -0.4 |
| 147 2,4-nonadienal                             | [M+Cl]- | C9H14O     | 173.07387                         |                    | 3.8E+04                | 2.0                    |                        |                        |                        |      |
| 148 Echinorine                                 | [M-H]-  | C11H12NO   | 173.08518                         |                    |                        |                        | 2.9E+04                | -3.3                   |                        |      |
| 149 Hydroxy pelargonic acid                    | [M-H]-  | C9H18O3    | 173.11785                         |                    |                        |                        |                        | 1.5E+04                | 2.7                    |      |
| 150 Histidinal                                 | [M+Cl]- | C6H9N3O    | 174.04410                         |                    |                        |                        |                        |                        | 2.7E+04                | -0.8 |
| 151 Acetyl phosphate                           | [M+Cl]- | C2H5O5P    | 174.95686                         | 2.5E+04            | -1.4                   |                        |                        |                        |                        |      |
| 152 Hydroxymethylcatechol                      | [M+Cl]- | C7H8O3     | 175.01759                         |                    |                        |                        | 1.8E+04                | -4.8                   |                        |      |
| 153 2-Oxo-6-methylthiohexanoic acid            | [M-H]-  | C7H12O3S   | 175.04286                         |                    |                        | 2.8E+04                | 3.3                    |                        |                        |      |
| 154 Nonenal                                    | [M+Cl]- | C9H16O     | 175.08909                         |                    |                        |                        | 2.0E+04                | 2.4                    |                        |      |
| 155 O-Phosphoethanolamine                      | [M+Cl]- | C2H8NO4P   | 175.98846                         |                    |                        |                        | 2.9E+04                | 0.2                    |                        |      |
| 156 Guvacoline                                 | [M+Cl]- | C7H11NO2   | 176.04765                         |                    |                        | 3.0E+04                | 4.1                    |                        |                        |      |
| 157 Valerianine                                | [M-H]-  | C11H15NO   | 176.10747                         |                    |                        | 2.0E+04                | 3.5                    |                        |                        |      |
| 158 Thiopheneacetic acid                       | [M+Cl]- | C6H6O2S    | 176.97885                         |                    |                        |                        |                        |                        | 4.9E+04                | -3.4 |
| 159 Cysteinylglycine                           | [M-H]-  | C5H10N2O3S | 177.03328                         |                    |                        |                        | 2.1E+04                | 3.7                    |                        |      |

| # Putative Annotation <sup>a</sup>      | Ion     | Formula    | m/z <sub>Theo.</sub> <sup>b</sup> | R2020 <sup>c</sup> | ppm W2020 <sup>c</sup> | ppm B2020 <sup>c</sup> | ppm R2021 <sup>c</sup> | ppm W2021 <sup>c</sup> | ppm B2021 <sup>c</sup> | ppm  |
|-----------------------------------------|---------|------------|-----------------------------------|--------------------|------------------------|------------------------|------------------------|------------------------|------------------------|------|
| 160 Vinylacetyl glycine                 | [M+Cl]- | C6H9NO3    | 178.02764                         | 3.2E+04            | 0.5                    |                        |                        |                        |                        |      |
| 161 Glucose                             | [M-H]-  | C6H12O6    | 179.05599                         |                    |                        |                        |                        | 3.4E+05                | 0.7                    |      |
| 162 Dicyclohexylamine                   | [M-H]-  | C12H23N    | 180.17521                         |                    |                        | 1.8E+04                | 3.1                    |                        |                        |      |
| 163 Dodecenal                           | [M-H]-  | C12H22O    | 181.15966                         |                    |                        |                        |                        |                        | 1.9E+04                | 0.7  |
| 164 Glutamic acid                       | [M+Cl]- | C5H9NO4    | 182.02344                         |                    |                        |                        | 2.3E+04                | -4.8                   |                        |      |
| 165 Thiouric acid                       | [M-H]-  | C5H4N4O2S  | 182.99888                         |                    |                        |                        |                        |                        | 2.7E+04                | -3.6 |
| 166 Chamazulene                         | [M-H]-  | C14H16     | 183.11784                         |                    |                        |                        |                        | 5.5E+04                | 0.5                    |      |
| 167 L-Serine O-sulfate                  | [M-H]-  | C3H7NO6S   | 183.99213                         | 3.2E+04            | -2.2                   |                        |                        |                        |                        |      |
| 168 2-Formylaminobenzaldehyde           | [M+Cl]- | C8H7NO2    | 184.01708                         |                    | 2.7E+05                | -0.2                   |                        |                        |                        |      |
| 169 D-Methionine                        | [M+Cl]- | C5H11NO2S  | 184.02045                         |                    | 2.7E+05                | 0.1                    |                        |                        |                        |      |
| 170 Methyladenine                       | [M+Cl]- | C6H7N5     | 184.04000                         |                    |                        |                        |                        | 1.4E+04                | -2.5                   |      |
| 171 cis-2-Carboxycyclohexyl-acetic acid | [M-H]-  | C9H14O4    | 185.08273                         |                    |                        |                        | 2.7E+04                | -4.3                   |                        |      |
| 172 2-Phenylglycine                     | [M+Cl]- | C8H9NO2    | 186.03273                         |                    | 4.3E+04                | -0.6                   |                        |                        |                        |      |
| 173 2-(Acetamidomethylene)succinate     | [M-H]-  | C7H9NO5    | 186.04143                         |                    |                        |                        |                        | 2.1E+04                | -3.4                   |      |
| 174 p-Cresol sulfate                    | [M-H]-  | C7H8O4S    | 187.00632                         |                    |                        |                        | 2.3E+04                | 3.9                    |                        |      |
| 175 Ngamma-Monomethyl-L-arginine        | [M-H]-  | C7H16N4O2  | 187.12005                         |                    | 5.3E+04                | -1.0                   |                        |                        |                        |      |
| 176 Thiocysteine                        | [M+Cl]- | C3H7NO2S2  | 187.96062                         |                    |                        |                        | 1.5E+04                | 3.2                    |                        |      |
| 177 N-Amidino-L-glutamate               | [M-H]-  | C6H11N3O4  | 188.06768                         | 2.8E+04            | -3.0                   |                        |                        |                        |                        |      |
| 178 Sulfocatechol                       | [M-H]-  | C6H6O5S    | 188.98635                         |                    |                        |                        |                        | 2.2E+04                | -0.2                   |      |
| 179 Ethoxycoumarin                      | [M-H]-  | C11H10O3   | 189.05531                         |                    |                        |                        | 2.0E+04                | 2.2                    |                        |      |
| 180 2-Oxo-7-methylthioheptanoic acid    | [M-H]-  | C8H14O3S   | 189.05909                         | 3.1E+04            | -0.5                   |                        |                        |                        |                        |      |
| 181 N-Methylpelletierine                | [M+Cl]- | C9H17NO    | 190.10042                         |                    | 4.0E+04                | -1.3                   |                        |                        | 2.2E+05                | 4.3  |
| 182 Orotic acid                         | [M+Cl]- | C5H4N2O4   | 190.98568                         |                    |                        | 4.2E+04                | 4.3                    |                        |                        |      |
| 183 Methylmuconolactone                 | [M+Cl]- | C7H8O4     | 191.01166                         | 2.7E+04            | 0.6                    |                        |                        |                        |                        |      |
| 184 Quinic acid                         | [M-H]-  | C7H12O6    | 191.05611                         | 3.0E+04            | 3.3                    |                        |                        |                        |                        |      |
| 185 (-)-Citronellol                     | [M+Cl]- | C10H20O    | 191.12082                         |                    | 5.5E+04                | -1.3                   |                        |                        |                        |      |
| 186 Maleylacetate                       | [M+Cl]- | C6H6O5     | 192.99131                         |                    |                        |                        |                        | 1.4E+04                | -2.0                   |      |
| 187 Methyl beta-D-galactoside           | [M-H]-  | C7H14O6    | 193.07088                         |                    |                        |                        |                        | 2.6E+04                | 4.6                    |      |
| 188 Glucosaminic acid                   | [M-H]-  | C6H13NO6   | 194.06614                         |                    |                        |                        |                        | 1.4E+04                | 4.5                    |      |
| 189 Aminopropylcadaverine               | [M+Cl]- | C8H21N3    | 194.14363                         |                    |                        |                        | 2.3E+04                | -3.5                   |                        |      |
| 190 Dihydroxyphenylpyruvate             | [M-H]-  | C9H8O5     | 195.02968                         |                    |                        |                        |                        |                        | 1.8E+04                | 1.1  |
| 191 Benzocoumarin                       | [M-H]-  | C13H8O2    | 195.04444                         |                    |                        |                        |                        | 2.2E+04                | 3.7                    |      |
| 192 Guanidinoethyl methyl phosphate     | [M-H]-  | C4H12N3O4P | 196.04975                         |                    |                        | 2.3E+04                | -2.5                   |                        |                        |      |
| 193 Hydroxymethyl-glutaric acid         | [M+Cl]- | C6H10O5    | 197.02180                         |                    |                        |                        | 1.3E+04                | 2.2                    |                        |      |
| 194 Hydroxylysine                       | [M+Cl]- | C6H14N2O3  | 197.06961                         |                    |                        |                        | 1.7E+04                | 1.2                    |                        |      |
| 195 Threonine phosphate                 | [M-H]-  | C4H10NO6P  | 198.01730                         | 2.4E+04            | -2.3                   |                        |                        |                        |                        |      |
| 196 3-Methyldioxyindole                 | [M+Cl]- | C9H9NO2    | 198.03273                         |                    | 3.7E+04                | 1.0                    |                        |                        |                        |      |
| 197 4-(3-Pyridyl)-3-butenic acid        | [M+Cl]- | C9H9NO2    | 198.03283                         |                    |                        |                        |                        |                        | 1.3E+04                | -0.5 |
| 198 Homomethionine                      | [M+Cl]- | C6H13NO2S  | 198.03610                         |                    | 3.7E+04                | -2.0                   |                        |                        |                        |      |
| 199 N-Acetylphenylethylamine            | [M+Cl]- | C10H13NO   | 198.06884                         |                    |                        |                        |                        |                        | 2.1E+04                | 1.4  |

| # Putative Annotation <sup>a</sup>                    | Ion     | Formula    | m/z <sub>Theo.</sub> <sup>b</sup> | R2020 <sup>c</sup> | ppm W2020 <sup>c</sup> | ppm B2020 <sup>c</sup> | ppm R2021 <sup>c</sup> | ppm W2021 <sup>c</sup> | ppm B2021 <sup>c</sup> | ppm  |
|-------------------------------------------------------|---------|------------|-----------------------------------|--------------------|------------------------|------------------------|------------------------|------------------------|------------------------|------|
| 200 Mephentermine                                     | [M+Cl]- | C11H17N    | 198.10531                         |                    |                        |                        |                        |                        | 1.7E+04                | 1.0  |
| 201 Hydroxycinnamate                                  | [M+Cl]- | C9H8O3     | 199.01723                         |                    |                        |                        | 2.4E+04                | -2.4                   |                        |      |
| 202 Phenylheptatriyne                                 | [M+Cl]- | C13H8      | 199.03228                         |                    |                        |                        |                        |                        | 2.1E+04                | -1.4 |
| 203 Propionyl caprylic acid                           | [M-H]-  | C11H20O3   | 199.13467                         |                    |                        | 2.6E+04                | -3.5                   |                        |                        |      |
| 204 Lauric acid                                       | [M-H]-  | C12H24O2   | 199.17035                         | 4.4E+05            | 2.4                    | 2.6E+04                | -0.7                   | 2.0E+05                | -2.4                   |      |
| 205 Hydroxy hendecanoic acid                          | [M-H]-  | C11H22O3   | 201.14957                         |                    |                        |                        |                        | 1.9E+04                | 0.2                    |      |
| 206 Butanoylphosphate                                 | [M+Cl]- | C4H9O5P    | 202.98900                         |                    |                        | 2.2E+04                | -4.1                   |                        |                        |      |
| 207 Pyridoxamine                                      | [M+Cl]- | C8H12N2O2  | 203.05928                         | 2.4E+04            | 4.8                    |                        |                        |                        |                        |      |
| 208 N6-Acetyl-N6-hydroxy-L-lysine                     | [M-H]-  | C8H16N2O4  | 203.10286                         |                    |                        | 3.0E+04                | 4.3                    |                        |                        |      |
| 209 Bellendine                                        | [M-H]-  | C12H15NO2  | 204.10387                         |                    |                        |                        | 1.6E+04                | -4.3                   |                        |      |
| 210 Methoxycinnamic acid ethyl ester                  | [M-H]-  | C12H14O3   | 205.08702                         | 1.9E+04            | 4.5                    |                        |                        |                        |                        |      |
| 211 Actinamine                                        | [M-H]-  | C8H18N2O4  | 205.11897                         |                    |                        |                        |                        | 2.7E+04                | 2.0                    |      |
| 212 Octylphenol                                       | [M-H]-  | C14H22O    | 205.15979                         | 5.6E+04            | -4.5                   |                        |                        |                        |                        |      |
| 213 4-(1,2-Epoxyethyl)-8,9-epoxy-enediyne             | [M-H]-  | C14H8O2    | 207.04515                         |                    | 1.0E+05                | -2.9                   |                        |                        |                        |      |
| 214 Dihydrolipoic acid                                | [M-H]-  | C8H16O2S2  | 207.05171                         |                    |                        |                        |                        | 8.3E+04                | 0.9                    |      |
| 215 Glycylproline                                     | [M+Cl]- | C7H12N2O3  | 207.05462                         |                    |                        |                        | 2.9E+04                | -2.1                   |                        |      |
| 216 Undecan-1-ol                                      | [M+Cl]- | C11H24O    | 207.15174                         |                    |                        | 4.0E+04                | 1.8                    |                        |                        |      |
| 217 5-Deoxy-5-aminoshikimic acid                      | [M+Cl]- | C7H11NO4   | 208.03821                         | 1.8E+04            | -2.4                   |                        |                        |                        | 1.4E+04                | -4.4 |
| 218 1,3-Dimethyl-8-isoquinolinol                      | [M+Cl]- | C11H11NO   | 208.05284                         |                    |                        |                        | 2.4E+04                | 3.0                    |                        |      |
| 219 Benzimidazolylguanidine                           | [M+Cl]- | C8H9N5     | 210.05515                         |                    |                        | 2.9E+04                | 0.2                    |                        |                        |      |
| 220 Perseitol                                         | [M-H]-  | C7H16O7    | 211.08145                         |                    |                        |                        |                        | 1.4E+04                | 4.2                    |      |
| 221 Myristaldehyde                                    | [M-H]-  | C14H28O    | 211.20607                         |                    |                        |                        | 1.2E+04                | 3.2                    |                        |      |
| 222 2-Hydroxy-6-oxonona-2,4-diene-1,9-dioate          | [M-H]-  | C9H10O6    | 213.03988                         |                    |                        |                        | 2.4E+04                | 2.7                    |                        |      |
| 223 Methyl lauric acid                                | [M-H]-  | C13H26O2   | 213.18619                         |                    |                        |                        | 1.7E+05                | -0.9                   |                        |      |
| 224 5-Methyl-3-isoxazolyl sulfate                     | [M+Cl]- | C4H5NO5S   | 213.95786                         |                    |                        | 4.4E+04                | 1.8                    |                        |                        |      |
| 225 Kinetin                                           | [M-H]-  | C10H9N5O   | 214.07419                         |                    |                        |                        |                        |                        | 3.0E+04                | -3.5 |
| 226 3-Phospho-D-erythronate                           | [M-H]-  | C4H9O8P    | 214.99623                         |                    | 2.1E+05                | -1.6                   |                        |                        |                        |      |
| 227 Bergapten                                         | [M-H]-  | C12H8O4    | 215.03587                         |                    |                        |                        | 5.7E+04                | -4.1                   | 3.1E+05                | 0.6  |
| 228 2-Methyl-3-hydroxy-5-formylpyridine-4-carboxylate | [M+Cl]- | C8H7NO4    | 216.00666                         |                    |                        |                        |                        |                        | 7.8E+04                | 1.2  |
| 229 2-(Hydroxymethyl)-3-(acetamidomethylene)succinate | [M-H]-  | C8H11NO6   | 216.05057                         |                    |                        | 2.0E+04                | 3.7                    |                        |                        |      |
| 230 O-Propanoylcarnitine                              | [M-H]-  | C10H19NO4  | 216.12413                         |                    | 3.8E+04                | -1.6                   |                        |                        |                        |      |
| 231 cis-1,2-Dihydroxy-1,2-dihydrodibenzothiophene     | [M-H]-  | C12H10O2S  | 217.03205                         |                    |                        |                        | 3.0E+04                | 3.8                    |                        |      |
| 232 Diisopropyl phosphate                             | [M+Cl]- | C6H15O4P   | 217.04020                         | 3.3E+04            | 4.0                    |                        |                        |                        |                        |      |
| 233 Xanthan                                           | [M+Cl]- | C13H10O    | 217.04257                         |                    | 1.1E+05                | 2.3                    |                        |                        |                        |      |
| 234 5-Methoxydimethyltryptamine                       | [M-H]-  | C13H18N2O  | 217.13464                         |                    | 4.1E+04                | 0.3                    |                        |                        |                        |      |
| 235 L-Homocysteic acid                                | [M+Cl]- | C4H9NO5S   | 217.98967                         |                    |                        |                        |                        |                        | 1.4E+04                | -0.6 |
| 236 4-Amino-5-phosphomethyl-2-methylpyrimidine        | [M-H]-  | C6H10N3O4P | 218.03385                         |                    |                        |                        |                        | 1.2E+04                | -1.1                   |      |
| 237 Ngamma-Nitro-L-arginine                           | [M-H]-  | C6H13N5O4  | 218.08906                         |                    |                        | 1.8E+04                | 1.9                    |                        |                        |      |

| # Putative Annotation <sup>a</sup>             | Ion     | Formula    | m/z <sub>Theo.</sub> <sup>b</sup> | R2020 <sup>c</sup> | ppm W2020 <sup>c</sup> | ppm B2020 <sup>c</sup> | ppm R2021 <sup>c</sup> | ppm W2021 <sup>c</sup> | ppm B2021 <sup>c</sup> | ppm          |
|------------------------------------------------|---------|------------|-----------------------------------|--------------------|------------------------|------------------------|------------------------|------------------------|------------------------|--------------|
| 238 N-Phenyl-1-naphthylamine                   | [M-H]-  | C16H13N    | 218.09776                         |                    |                        |                        |                        | 1.5E+04                | -1.1                   |              |
| 239 Tecostanine                                | [M+Cl]- | C11H21NO   | 218.13207                         |                    |                        | 1.7E+04                | -1.6                   |                        |                        | 1.4E+04 -3.5 |
| 240 Polygonolide                               | [M-H]-  | C12H12O4   | 219.06628                         | 1.8E+04            | 2.8                    |                        |                        |                        |                        |              |
| 241 Chamazulene                                | [M+Cl]- | C14H16     | 219.09499                         |                    |                        |                        |                        | 1.6E+04                | -1.8                   | 2.5E+04 0.0  |
| 242 Dihydroxykynurenate                        | [M-H]-  | C10H7NO5   | 220.02507                         |                    |                        |                        | 1.3E+04                | 0.3                    |                        |              |
| 243 Sulfomuconate                              | [M-H]-  | C6H6O7S    | 220.97563                         |                    |                        |                        |                        | 1.6E+04                | 2.3                    |              |
| 244 Undecanoic acid                            | [M+Cl]- | C11H22O2   | 221.13076                         |                    |                        | 2.0E+04                | 2.8                    |                        |                        |              |
| 245 n-Decanohydroxamic acid                    | [M+Cl]- | C10H21NO2  | 222.12604                         |                    |                        | 2.0E+04                | 2.7                    |                        |                        |              |
| 246 Methylnaconitate                           | [M+Cl]- | C7H8O6     | 223.00149                         | 2.3E+04            | -2.7                   |                        |                        |                        |                        |              |
| 247 Dihydroflavone                             | [M-H]-  | C15H12O2   | 223.07702                         |                    |                        |                        |                        | 1.4E+04                | -2.5                   |              |
| 248 Prenyl-L-cysteine                          | [M+Cl]- | C8H15NO2S  | 224.05259                         |                    |                        |                        | 1.3E+04                | -3.7                   | 1.3E+04                | -4.4         |
| 249 Homocitrulline                             | [M+Cl]- | C7H15N3O3  | 224.08074                         |                    | 3.3E+04                | -2.9                   |                        |                        |                        |              |
| 250 Methylthiooctanaldoxime                    | [M+Cl]- | C9H19NOS   | 224.08801                         |                    |                        |                        | 1.3E+04                | 0.6                    |                        |              |
| 251 Myristoleic acid                           | [M-H]-  | C14H26O2   | 225.18600                         | 3.2E+04            | 1.7                    |                        |                        |                        |                        |              |
| 252 Myristic acid                              | [M-H]-  | C14H28O2   | 227.20176                         |                    |                        |                        |                        | 1.3E+06                | -0.5                   |              |
| 253 N-Decanoylglycine                          | [M-H]-  | C12H23NO3  | 228.16100                         |                    |                        |                        |                        | 3.4E+05                | -2.1                   |              |
| 254 Ferulic acid                               | [M+Cl]- | C10H10O4   | 229.02731                         |                    | 1.9E+05                | 2.1                    |                        |                        |                        |              |
| 255 Zingerone                                  | [M+Cl]- | C11H14O3   | 229.06384                         |                    |                        |                        |                        | 2.7E+04                | -0.6                   |              |
| 256 Hydroxypseudooxynicotine                   | [M+Cl]- | C10H14N2O2 | 229.07493                         | 2.9E+04            | 3.8                    | 5.9E+04                | 4.5                    |                        |                        |              |
| 257 Xanthine-8-carboxylate                     | [M+Cl]- | C6H4N4O4   | 230.99266                         | 2.4E+04            | -1.8                   |                        |                        |                        |                        |              |
| 258 Gluconic acid                              | [M+Cl]- | C6H12O7    | 231.02840                         |                    |                        |                        |                        |                        | 2.8E+04                | -3.0         |
| 259 Hydroxyatrazine                            | [M+Cl]- | C8H15N5O   | 232.09700                         |                    |                        |                        | 2.5E+04                | 0.3                    |                        |              |
| 260 Curcumenol                                 | [M-H]-  | C15H22O2   | 233.15472                         |                    |                        |                        |                        |                        | 1.9E+04                | -0.1         |
| 261 Benzoxazolate                              | [M-H]-  | C11H9NO5   | 234.04018                         |                    |                        | 1.8E+04                | 2.6                    |                        |                        |              |
| 262 D-Erythrose 4-phosphate                    | [M+Cl]- | C4H9O7P    | 234.97857                         |                    |                        |                        |                        |                        | 1.3E+04                | -2.5         |
| 263 Indolepyruvic acid                         | [M+Cl]- | C11H9NO3   | 238.02764                         | 2.0E+04            | 3.9                    |                        |                        |                        |                        |              |
| 264 Dehydrofalcarnone                          | [M-H]-  | C17H20O    | 239.14451                         |                    |                        |                        | 4.2E+04                | -1.6                   | 4.3E+04                | 1.4          |
| 265 Tridecenyl acetate                         | [M-H]-  | C15H28O2   | 239.20131                         |                    |                        |                        | 1.3E+05                | 1.4                    |                        |              |
| 266 N-(2,3-Dihydroxybenzoyl)-L-serine          | [M-H]-  | C10H11NO6  | 240.05131                         |                    |                        |                        | 2.1E+04                | 0.2                    |                        |              |
| 267 4-(Dimethylamino)phenylazoxybenzene        | [M-H]-  | C14H15N3O  | 240.11424                         | 1.8E+04            | 1.0                    |                        |                        |                        |                        |              |
| 268 Methyl myristic acid                       | [M-H]-  | C15H30O2   | 241.21730                         | 3.4E+05            | 1.0                    | 1.6E+06                | 0.5                    | 3.0E+05                | -2.4                   |              |
| 269 Methyl 5-hydroxy-2-benzimidazole carbamate | [M+Cl]- | C9H9N3O3   | 242.03363                         |                    |                        |                        |                        |                        | 2.1E+04                | 0.7          |
| 270 N-Undecanoylglycine                        | [M-H]-  | C13H25NO3  | 242.17628                         |                    |                        |                        | 1.8E+05                | -0.5                   | 8.4E+04                | -2.2         |
| 271 Jasmonic acid                              | [M+Cl]- | C12H18O3   | 245.09446                         |                    |                        |                        |                        |                        | 1.3E+04                | 2.2          |
| 272 3-(2-Carboxyethenyl)-cis,cis-muconate      | [M+Cl]- | C9H8O6     | 247.00120                         |                    |                        |                        | 8.2E+04                | 1.2                    |                        |              |
| 273 Confertin                                  | [M-H]-  | C15H20O3   | 247.13400                         |                    |                        | 1.6E+04                | -0.1                   |                        |                        |              |
| 274 N-Caffeoylputrescine                       | [M-H]-  | C13H18N2O3 | 249.12477                         |                    |                        | 2.2E+04                | -1.2                   |                        |                        |              |
| 275 Absciscic alcohol                          | [M-H]-  | C15H22O3   | 249.15051                         |                    |                        |                        |                        | 1.4E+04                | -3.6                   |              |
| 276 Glycerylphosphorylethanolamine             | [M+Cl]- | C5H14NO6P  | 250.02528                         | 2.7E+04            | 2.8                    |                        |                        |                        |                        |              |
| 277 cis-Hinokiresinol                          | [M-H]-  | C17H16O2   | 251.10854                         |                    |                        | 3.0E+04                | -3.1                   |                        |                        |              |

| #   | Putative Annotation <sup>a</sup>                                    | Ion     | Formula     | m/z <sub>Theo.</sub> <sup>b</sup> | R2020 <sup>c</sup> | ppm W2020 <sup>c</sup> | ppm B2020 <sup>c</sup> | ppm R2021 <sup>c</sup> | ppm W2021 <sup>c</sup> | ppm B2021 <sup>c</sup> | ppm     |         |         |         |      |
|-----|---------------------------------------------------------------------|---------|-------------|-----------------------------------|--------------------|------------------------|------------------------|------------------------|------------------------|------------------------|---------|---------|---------|---------|------|
| 278 | Vulgraon B                                                          | [M+Cl]- | C16H24      | 251.15795                         |                    |                        |                        | 7.1E+04                | -3.0                   |                        |         |         |         |         |      |
| 279 | S-(Phenylacetothiohydroximoyl)-L-cysteine                           | [M-H]-  | C11H14N2O3S | 253.06524                         | 3.2E+04            | -2.3                   |                        |                        |                        |                        |         |         |         |         |      |
| 280 | Palmitoleic acid                                                    | [M-H]-  | C16H30O2    | 253.21719                         |                    |                        |                        |                        | 3.6E+05                | 0.5                    |         |         |         |         |      |
| 281 | Nicotinate D-ribonucleoside                                         | [M-H]-  | C11H14NO6   | 255.07484                         | 2.0E+05            | -0.6                   |                        |                        |                        |                        |         |         |         |         |      |
| 282 | N-Acetyl-beta-D-glucosaminylamine                                   | [M+Cl]- | C8H16N2O5   | 255.07532                         | 2.0E+05            | -2.5                   |                        |                        |                        |                        |         |         |         |         |      |
| 283 | Palmitic acid                                                       | [M-H]-  | C16H32O2    | 255.23295                         | 1.3E+06            | -0.4                   | 4.5E+06                | -0.2                   | 5.3E+05                | -1.1                   | 7.4E+05 | 2.8     | 3.2E+05 | 1.0     |      |
| 284 | Benzythioguanine                                                    | [M-H]-  | C12H11N5S   | 256.06568                         |                    |                        |                        | 2.6E+04                | 2.2                    |                        |         |         |         |         |      |
| 285 | Hydroxykynurenine                                                   | [M+Cl]- | C10H12N2O4  | 259.04857                         |                    |                        |                        |                        |                        |                        | 1.9E+04 | 2.1     |         |         |      |
| 286 | Hemigossypol                                                        | [M-H]-  | C15H16O4    | 259.09758                         |                    | 3.2E+04                | 1.1                    |                        |                        |                        |         |         |         |         |      |
| 287 | 1-Hydroxy-2-methyl-2-butenyl 4-diphosphate                          | [M-H]-  | C5H12O8P2   | 260.99314                         |                    |                        |                        | 1.6E+04                | 1.2                    |                        |         |         |         |         |      |
| 288 | Chorismic acid                                                      | [M+Cl]- | C10H10O6    | 261.01660                         |                    |                        |                        |                        |                        |                        | 7.5E+04 | 2.1     |         |         |      |
| 289 | N-acetyl-S-(3-oxo-3-carboxy-n-propyl)cysteine                       | [M-H]-  | C9H13NO6S   | 262.03969                         |                    |                        |                        |                        | 2.8E+04                | -2.3                   |         |         |         |         |      |
| 290 | Serine phosphoethanolamine                                          | [M+Cl]- | C5H13N2O6P  | 263.02052                         |                    |                        |                        | 2.1E+04                | 0.0                    |                        |         |         |         |         |      |
| 291 | Myristic acid                                                       | [M+Cl]- | C14H28O2    | 263.17833                         | 2.7E+04            | 2.1                    | 2.6E+06                | 0.4                    | 1.4E+06                | -2.1                   | 1.3E+04 | 1.9     |         |         |      |
| 292 | Xanthoxic acid                                                      | [M-H]-  | C15H22O4    | 265.14385                         |                    |                        |                        |                        |                        |                        | 7.4E+04 | 2.6     |         |         |      |
| 293 | Pentadecadienyl acetate                                             | [M-H]-  | C17H30O2    | 265.21730                         | 6.7E+04            | 3.7                    |                        |                        |                        |                        |         |         |         |         |      |
| 294 | N-Succinyl-L-glutamate 5-semialdehyde                               | [M+Cl]- | C9H13NO6    | 266.04416                         |                    |                        |                        |                        | 1.6E+04                | -1.8                   |         |         |         |         |      |
| 295 | Hexadecatrienal                                                     | [M+Cl]- | C16H26O     | 269.16777                         | 6.1E+04            | -2.8                   |                        | 2.1E+04                | 4.2                    |                        |         |         |         |         |      |
| 296 | 2,4'-Dihydroxy-4-methoxydihydrochalcone                             | [M-H]-  | C16H16O4    | 271.09697                         |                    |                        |                        |                        |                        | 3.1E+04                | 2.3     |         |         |         |      |
| 297 | Glutaconylcarnitine                                                 | [M-H]-  | C12H19NO6   | 272.11442                         |                    |                        |                        | 2.2E+04                | -1.7                   |                        |         |         |         |         |      |
| 298 | Methoxychalcone                                                     | [M+Cl]- | C16H14O2    | 273.06888                         |                    |                        |                        |                        |                        | 3.3E+04                | -0.4    |         |         |         |      |
| 299 | Ranunculin                                                          | [M-H]-  | C11H16O8    | 275.07640                         |                    |                        |                        | 4.5E+04                | 3.1                    |                        |         |         |         |         |      |
| 300 | Cyperaquinone                                                       | [M+Cl]- | C14H10O4    | 277.02652                         |                    |                        |                        |                        |                        | 3.4E+04                | 2.9     |         |         |         |      |
| 301 | Thymidine                                                           | [M+Cl]- | C10H14N2O5  | 277.06028                         |                    |                        |                        | 2.3E+04                | -2.2                   |                        |         |         |         |         |      |
| 302 | Pantetheine                                                         | [M-H]-  | C11H22N2O4S | 277.12275                         | 2.3E+04            | 2.4                    |                        |                        |                        |                        |         |         |         |         |      |
| 303 | Linoleic acid                                                       | [M-H]-  | C18H32O2    | 279.23357                         |                    |                        |                        |                        |                        |                        | 4.7E+04 | -2.2    |         |         |      |
| 304 | 7-N,N-Dimethylamino-1,2,3,4,5-pentathiocyclooctane                  | [M+Cl]- | C5H11NS5    | 279.91979                         |                    |                        |                        |                        |                        |                        | 1.5E+04 | -3.2    |         |         |      |
| 305 | Oleamide                                                            | [M-H]-  | C18H35NO    | 280.26471                         |                    |                        |                        |                        |                        |                        | 2.1E+04 | -0.4    |         |         |      |
| 306 | Oleic acid                                                          | [M-H]-  | C18H34O2    | 281.24860                         | 1.8E+05            | 1.1                    |                        | 1.9E+05                | 1.2                    | 1.3E+05                | -0.3    | 2.0E+05 | -0.1    | 6.0E+04 | -2.0 |
| 307 | Stearic acid                                                        | [M-H]-  | C18H36O2    | 283.26425                         | 7.9E+05            | -1.2                   | 1.6E+06                | -0.4                   | 1.9E+05                | -0.5                   | 3.4E+05 | 0.9     |         |         |      |
| 308 | C17 Sphingosine                                                     | [M-H]-  | C17H35NO2   | 284.25933                         |                    |                        |                        | 3.7E+04                | 0.6                    |                        |         |         |         |         |      |
| 309 | 4'-O-Methylisoflavone                                               | [M+Cl]- | C16H12O3    | 287.04708                         |                    |                        |                        |                        |                        |                        | 4.6E+04 | 3.4     |         |         |      |
| 310 | Dihydroxy palmitic acid                                             | [M-H]-  | C16H32O4    | 287.22210                         |                    |                        |                        | 2.3E+05                | 2.4                    | 2.3E+05                | 1.1     |         |         |         |      |
| 311 | All-trans-13,14-dihydroretinol                                      | [M-H]-  | C20H32O     | 287.23804                         |                    | 1.1E+05                | 1.2                    |                        |                        |                        |         |         |         |         |      |
| 312 | 5-(3'-Carboxy-3'-oxopropenyl)-4,6-dihydroxypicolinate               | [M+Cl]- | C10H7NO7    | 287.99126                         |                    |                        |                        |                        |                        | 2.1E+04                | 1.4     |         |         |         |      |
| 313 | methyl 4-[2-(2-formyl-vinyl)-3-hydroxy-5-oxo-cyclopentyl]-butanoate | [M+Cl]- | C13H18O5    | 289.08580                         |                    |                        |                        | 2.3E+05                | -3.4                   |                        |         |         |         |         |      |
| 314 | N-(4-Aminobutyl)-L-histidine                                        | [M+Cl]- | C11H18N4O3  | 289.10760                         |                    |                        |                        |                        |                        |                        | 1.2E+05 | -1.1    |         |         |      |

| # Putative Annotation <sup>a</sup>                             | Ion     | Formula     | m/z <sub>Theo.</sub> <sup>b</sup> | R2020 <sup>c</sup> | ppm W2020 <sup>c</sup> | ppm B2020 <sup>c</sup> | ppm R2021 <sup>c</sup> | ppm W2021 <sup>c</sup> | ppm B2021 <sup>c</sup> | ppm  |
|----------------------------------------------------------------|---------|-------------|-----------------------------------|--------------------|------------------------|------------------------|------------------------|------------------------|------------------------|------|
| 315 5-O-Methylvisamminol                                       | [M-H]-  | C16H18O5    | 289.10760                         |                    |                        |                        |                        |                        | 1.2E+05                | 1.9  |
| 316 2-Deoxy-2,3-dehydro-N-acetylneuraminic acid                | [M-H]-  | C11H17NO8   | 290.08789                         |                    |                        |                        |                        | 2.0E+04                | 0.9                    |      |
| 317 Phenylbutyrylglutamine                                     | [M-H]-  | C15H20N2O4  | 291.13500                         |                    |                        |                        |                        |                        | 2.0E+04                | 0.1  |
| 318 Tutin                                                      | [M-H]-  | C15H18O6    | 293.10396                         |                    |                        |                        | 7.0E+04                | -3.1                   |                        |      |
| 319 Gingerol                                                   | [M-H]-  | C17H26O4    | 293.17675                         |                    |                        |                        |                        |                        | 3.3E+04                | -3.1 |
| 320 Khellin                                                    | [M+Cl]- | C14H12O5    | 295.03788                         | 2.9E+04            | 0.5                    |                        |                        |                        |                        |      |
| 321 L-gamma-glutamyl-L-isoleucine                              | [M+Cl]- | C11H20N2O5  | 295.10724                         |                    |                        |                        |                        |                        | 1.7E+04                | -2.1 |
| 322 Methylaminoadenosine                                       | [M-H]-  | C11H16N6O4  | 295.11639                         |                    |                        |                        |                        | 1.8E+04                | -1.2                   |      |
| 323 Beta-Acetoxy-4-oplopanone                                  | [M-H]-  | C17H28O4    | 295.19148                         | 5.2E+04            | -3.1                   |                        |                        |                        |                        |      |
| 324 Phosphotyrosine                                            | [M+Cl]- | C9H12NO6P   | 296.00963                         | 3.0E+04            | -2.5                   |                        |                        |                        |                        |      |
| 325 Longifolnine                                               | [M-H]-  | C17H15NO4   | 296.09379                         |                    |                        |                        |                        | 2.1E+04                | -3.2                   |      |
| 326 3-Methoxy-4-Hydroxyphenylglycol sulfate                    | [M+Cl]- | C9H12O7S    | 299.00001                         |                    |                        |                        |                        |                        | 1.8E+04                | -0.8 |
| 327 Kaempferol 4'-methyl ether                                 | [M-H]-  | C16H12O6    | 299.05611                         | 3.8E+04            | 1.3                    |                        |                        |                        |                        |      |
| 328 MG(0:0/14:1(9Z)/0:0)                                       | [M-H]-  | C17H32O4    | 299.22214                         |                    |                        |                        | 1.8E+05                | 2.2                    |                        |      |
| 329 Methoxybrassinin                                           | [M+Cl]- | C12H14N2OS2 | 301.02389                         |                    |                        |                        |                        | 2.2E+04                | 0.9                    |      |
| 330 MG(0:0/14:0/0:0)                                           | [M-H]-  | C17H34O4    | 301.23867                         |                    |                        |                        |                        | 1.2E+05                | -0.8                   |      |
| 331 2-Amino-4-oxo-6-(1',2'-dioxopropyl)-7,8-dihydroxypteridine | [M+Cl]- | C9H9N5O5    | 302.03041                         |                    |                        |                        |                        | 1.7E+04                | -2.1                   |      |
| 332 Coumestrol                                                 | [M+Cl]- | C15H8O5     | 303.00657                         | 8.6E+04            | -1.1                   |                        |                        |                        |                        |      |
| 333 3',4'-Methylenedioxymurone                                 | [M-H]-  | C18H10O5    | 305.04555                         |                    | 1.7E+05                | 0.1                    |                        |                        |                        |      |
| 334 Gallocatechin                                              | [M-H]-  | C15H14O7    | 305.06669                         |                    |                        | 2.7E+04                | 0.0                    |                        |                        |      |
| 335 Isolochocarpin                                             | [M-H]-  | C20H18O3    | 305.11798                         |                    |                        |                        | 4.7E+04                | 1.1                    |                        |      |
| 336 Eicosatrienoic acid                                        | [M-H]-  | C20H34O2    | 305.24929                         |                    |                        | 3.7E+04                | -2.2                   |                        |                        |      |
| 337 Octadecatrienoic acid                                      | [M+Cl]- | C18H24O2    | 307.14613                         |                    |                        |                        | 2.1E+04                | 2.9                    |                        |      |
| 338 Cinmethylin                                                | [M+Cl]- | C18H26O2    | 309.16357                         |                    |                        |                        |                        |                        | 3.2E+04                | -2.9 |
| 339 Botrydial                                                  | [M-H]-  | C17H26O5    | 309.17075                         | 1.8E+05            | -1.4                   |                        |                        |                        |                        |      |
| 340 Sauroxine                                                  | [M+Cl]- | C17H26N2O   | 309.17392                         |                    |                        | 4.2E+05                | 0.0                    |                        |                        |      |
| 341 PC(0:0/3:1(2E))                                            | [M-H]-  | C11H22NO7P  | 310.10524                         |                    |                        | 3.5E+04                | 2.8                    |                        |                        |      |
| 342 Epsilon-(gamma-Glutamyl)-lysine                            | [M+Cl]- | C11H21N3O5  | 310.11752                         | 1.0E+05            | -0.2                   |                        |                        |                        |                        |      |
| 343 Jatrophone                                                 | [M-H]-  | C20H24O3    | 311.16444                         |                    |                        |                        |                        |                        | 4.7E+04                | 2.7  |
| 344 10,12-octadecadienoic acid                                 | [M+Cl]- | C18H28O2    | 311.17833                         |                    | 9.5E+05                | 1.7                    |                        |                        |                        |      |
| 345 Phosphoribosylformylglycineamide                           | [M-H]-  | C8H16N3O8P  | 312.06018                         |                    |                        |                        |                        |                        | 4.4E+04                | 0.1  |
| 346 4-Oxo-13-cis-retinoate                                     | [M-H]-  | C20H25O3    | 312.17309                         |                    | 1.6E+05                | 0.8                    |                        |                        |                        |      |
| 347 Octadecanedioic acid                                       | [M-H]-  | C18H34O4    | 313.23799                         |                    |                        | 8.2E+04                | 1.4                    |                        |                        |      |
| 348 MG(15:0/0:0/0:0)                                           | [M-H]-  | C18H36O4    | 315.25477                         |                    |                        |                        | 5.2E+04                | -2.2                   |                        |      |
| 349 Caffeic acid phenethyl ester                               | [M+Cl]- | C17H16O4    | 319.07426                         | 4.9E+04            | 0.8                    |                        |                        |                        |                        |      |
| 350 gamma-L-Glutamyl-L-cysteinyl-beta-alanine                  | [M-H]-  | C11H19N3O6S | 320.09218                         | 3.5E+04            | 2.1                    |                        |                        |                        |                        |      |
| 351 Cytidine-5'-monophosphate                                  | [M-H]-  | C9H14N3O8P  | 322.04457                         | 4.4E+04            | 2.3                    |                        |                        |                        |                        |      |
| 352 Fructose 1,6-bisphosphate                                  | [M-H]-  | C6H14O11P2  | 322.99386                         | 9.7E+04            | 0.3                    |                        |                        |                        |                        |      |
| 353 Portulacaxanthin I                                         | [M-H]-  | C14H16N2O7  | 323.08920                         |                    |                        |                        |                        |                        | 1.5E+04                | -2.2 |

| # Putative Annotation <sup>a</sup>                                            | Ion     | Formula     | m/z <sub>Theo.</sub> <sup>b</sup> | R2020 <sup>c</sup> | ppm W2020 <sup>c</sup> | ppm B2020 <sup>c</sup> | ppm R2021 <sup>c</sup> | ppm W2021 <sup>c</sup> | ppm B2021 <sup>c</sup> | ppm  |
|-------------------------------------------------------------------------------|---------|-------------|-----------------------------------|--------------------|------------------------|------------------------|------------------------|------------------------|------------------------|------|
| 354 Karwinaphthol B                                                           | [M+Cl]- | C17H20O4    | 323.10463                         |                    |                        |                        | 1.6E+04                | 2.9                    |                        |      |
| 355 Isoacitretin                                                              | [M-H]-  | C21H26O3    | 325.18178                         |                    |                        | 2.9E+05                | -2.7                   |                        |                        |      |
| 356 Colnelenic acid                                                           | [M+Cl]- | C18H28O3    | 327.17325                         | 5.8E+05            | 0.0                    |                        |                        |                        |                        |      |
| 357 3,7,11,15-Tetramethyl-6,10,14-hexadecatrien-1-ol                          | [M+Cl]- | C20H36O     | 327.24670                         |                    |                        |                        |                        | 3.2E+04                | -2.1                   |      |
| 358 MG(0:0/16:0/0:0)                                                          | [M-H]-  | C19H38O4    | 329.27043                         |                    |                        |                        |                        |                        |                        |      |
| 359 Gibberellin A12                                                           | [M-H]-  | C20H28O4    | 331.19140                         |                    |                        |                        | 7.0E+04                | 0.3                    |                        |      |
| 360 Longifolonine                                                             | [M+Cl]- | C17H15NO4   | 332.06971                         |                    |                        |                        |                        | 2.6E+04                | -0.6                   |      |
| 361 Heptahydroxyflavone                                                       | [M-H]-  | C15H10O9    | 333.02521                         | 5.2E+04            | -2.7                   |                        |                        |                        |                        |      |
| 362 Kaempferol 4'-methyl ether                                                | [M+Cl]- | C16H12O6    | 335.03279                         |                    | 7.9E+04                | -0.4                   |                        |                        |                        |      |
| 363 Umbellatine                                                               | [M-H]-  | C20H18NO4   | 335.11574                         |                    |                        |                        |                        |                        | 3.0E+04                | 1.7  |
| 364 Maximaisoflavone J                                                        | [M-H]-  | C21H20O4    | 335.12986                         |                    |                        |                        |                        | 2.3E+04                | -2.9                   |      |
| 365 6-hydroperoxy-4E,8Z,11Z,14Z-eicosatetraenoic acid                         | [M-H]-  | C20H32O4    | 335.22247                         |                    |                        |                        |                        |                        | 2.3E+04                | 0.9  |
| 366 N-Acetyl-D-glucosamine 6-phosphate                                        | [M+Cl]- | C8H16NO9P   | 336.02567                         | 6.2E+04            | -1.4                   |                        |                        |                        |                        |      |
| 367 S-(Hydroxymethyl)glutathione                                              | [M-H]-  | C11H19N3O7S | 336.08700                         |                    |                        |                        |                        | 3.5E+04                | 0.3                    |      |
| 368 (Ac)2-L-lysyl-D-alanine                                                   | [M+Cl]- | C13H23N3O5  | 336.13295                         |                    |                        | 2.7E+04                | 0.7                    |                        |                        |      |
| 369 Neotenone                                                                 | [M-H]-  | C19H14O6    | 337.07117                         |                    |                        |                        |                        | 2.9E+04                | 1.8                    |      |
| 370 5,7-Dimethoxy-8-prenylflavan                                              | [M-H]-  | C22H26O3    | 337.18092                         | 1.8E+05            | 2.3                    |                        |                        |                        |                        |      |
| 371 Eicosapentaenoic acid                                                     | [M+Cl]- | C20H30O2    | 337.19389                         |                    |                        |                        | 4.0E+04                | 0.3                    |                        |      |
| 372 1beta,3beta,5alpha,6beta-tetrahydroxyandrostane-17-one                    | [M-H]-  | C19H30O5    | 337.20205                         |                    | 3.9E+05                | -1.1                   |                        |                        |                        |      |
| 373 Disopyramide                                                              | [M-H]-  | C21H29N3O   | 338.22294                         |                    |                        |                        |                        |                        | 2.2E+04                | 2.5  |
| 374 Oleoyl glycine                                                            | [M-H]-  | C20H37NO3   | 338.27007                         | 1.4E+05            | 1.6                    |                        |                        |                        |                        |      |
| 375 Aristolochic acid                                                         | [M-H]-  | C17H11NO7   | 340.04591                         |                    |                        | 3.2E+04                | 1.1                    |                        |                        |      |
| 376 Lactosamine                                                               | [M-H]-  | C12H23NO10  | 340.12500                         |                    |                        |                        |                        | 1.7E+04                | -0.2                   |      |
| 377 Lupinate                                                                  | [M+Cl]- | C13H18N6O3  | 341.11344                         |                    | 2.1E+05                | 2.1                    |                        |                        |                        |      |
| 378 Matricin                                                                  | [M+Cl]- | C17H22O5    | 341.11706                         |                    |                        |                        |                        |                        | 5.4E+04                | -2.7 |
| 379 11,14-eicosadienoic acid                                                  | [M+Cl]- | C20H36O2    | 343.24093                         |                    | 1.3E+05                | 1.2                    |                        |                        |                        |      |
| 380 Ovalifolin                                                                | [M-H]-  | C22H18O4    | 345.11386                         |                    |                        |                        |                        | 1.6E+04                | -1.8                   |      |
| 381 O-Arachidonoyl Ethanolamine                                               | [M-H]-  | C22H37NO2   | 346.27515                         |                    | 3.7E+04                | -0.9                   |                        |                        |                        |      |
| 382 Triphenyl-1-hexene                                                        | [M+Cl]- | C24H24      | 347.15785                         |                    |                        | 2.6E+04                | -1.9                   |                        |                        |      |
| 383 Hydroxybowdichione                                                        | [M+Cl]- | C16H10O7    | 349.01284                         |                    |                        |                        |                        | 2.2E+04                | -2.3                   |      |
| 384 N-Acetylthienamycin                                                       | [M+Cl]- | C13H18N2O5S | 349.06262                         |                    |                        |                        |                        |                        | 2.2E+04                | 1.2  |
| 385 Vincamine                                                                 | [M-H]-  | C21H26N2O3  | 353.18699                         |                    |                        |                        |                        | 5.8E+04                | 0.2                    |      |
| 386 5-hydroperoxy-7-[3,5-epidioxy-2-(2-octenyl)-cyclopentyl]-6-heptenoic acid | [M-H]-  | C19H30O6    | 353.19603                         |                    |                        | 2.8E+05                | 2.6                    | 1.7E+05                | -2.1                   |      |
| 387 Spirasine I                                                               | [M-H]-  | C22H29NO3   | 354.20707                         |                    |                        | 6.9E+04                | 1.1                    |                        |                        |      |
| 388 5-O-(1-Carboxyvinyl)-3-phosphoshikimate                                   | [M+Cl]- | C10H13O10P  | 358.99336                         |                    |                        |                        |                        |                        | 2.1E+04                | 1.9  |
| 389 Dityrosine                                                                | [M-H]-  | C18H20N2O6  | 359.12403                         |                    |                        |                        | 2.6E+04                | 2.3                    |                        |      |
| 390 p-Coumaroyl-D-glucose                                                     | [M+Cl]- | C15H18O8    | 361.07042                         |                    |                        |                        |                        |                        | 1.7E+04                | -2.4 |



| # Putative Annotation <sup>a</sup>                                                         | Ion     | Formula     | m/z <sub>Theo.</sub> <sup>b</sup> | R2020 <sup>c</sup> | ppm W2020 <sup>c</sup> | ppm B2020 <sup>c</sup> | ppm R2021 <sup>c</sup> | ppm W2021 <sup>c</sup> | ppm B2021 <sup>c</sup> | ppm         |
|--------------------------------------------------------------------------------------------|---------|-------------|-----------------------------------|--------------------|------------------------|------------------------|------------------------|------------------------|------------------------|-------------|
| 391 Shikodonin                                                                             | [M-H]-  | C20H26O6    | 361.16566                         |                    | 3.8E+04                | 2.5                    |                        |                        |                        |             |
| 392 Europine                                                                               | [M+Cl]- | C16H27NO6   | 364.15385                         |                    |                        |                        | 1.4E+05                | -1.7                   |                        |             |
| 393 Palmitoyl Serinol                                                                      | [M+Cl]- | C19H39NO3   | 364.26289                         |                    |                        |                        | 3.7E+04                | -1.4                   |                        |             |
| 394 7'-carboxy-gama-tocotrienol                                                            | [M+Cl]- | C20H27O4    | 366.16107                         |                    |                        |                        |                        |                        | 1.9E+04                | -2.0        |
| 395 Catechin 5,7,3'-trimethyl ether                                                        | [M+Cl]- | C18H20O6    | 367.09570                         |                    |                        |                        |                        |                        | 3.6E+04                | -0.8        |
| 396 Hydroxy-PGE1                                                                           | [M-H]-  | C20H34O6    | 369.22818                         |                    |                        |                        | 2.6E+04                | 0.2                    |                        |             |
| 397 Docosanedioic acid                                                                     | [M-H]-  | C22H42O4    | 369.30103                         |                    | 7.0E+04                | 2.4                    |                        |                        |                        |             |
| 398 10,11-dihydro-12-oxo-LTB4                                                              | [M+Cl]- | C20H31O4    | 370.19125                         |                    |                        |                        |                        |                        | 1.9E+04                | 1.0         |
| 399 3-Epihydroxymugineic acid                                                              | [M+Cl]- | C12H20N2O9  | 371.08548                         |                    |                        |                        |                        |                        | 1.5E+04                | 2.2         |
| 400 1-Acetylaspidoalbidine                                                                 | [M+Cl]- | C21H26N2O2  | 373.16869                         |                    |                        |                        |                        |                        |                        | 2.2E+04 0.4 |
| 401 9'-Carboxy-gama-chromanol                                                              | [M-H]-  | C23H35O4    | 374.24626                         |                    | 3.8E+04                | -2.6                   |                        |                        |                        |             |
| 402 Riboflavin                                                                             | [M-H]-  | C17H20N4O6  | 375.13087                         |                    |                        |                        | 3.4E+04                | 0.4                    |                        |             |
| 403 PGE1 alcohol                                                                           | [M+Cl]- | C20H36O4    | 375.23076                         | 2.9E+04            | 1.3                    |                        |                        |                        |                        |             |
| 404 Brosimacutin C                                                                         | [M+Cl]- | C20H22O5    | 377.11641                         |                    |                        |                        |                        |                        | 2.0E+04                | -0.8        |
| 405 Eicosanedioic acid                                                                     | [M+Cl]- | C20H38O4    | 377.24641                         |                    | 2.8E+05                | -1.5                   |                        |                        |                        |             |
| 406 N-(7-Mercaptoheptanoyl)threonine 3-O-phosphate                                         | [M+Cl]- | C11H22NO7PS | 378.05459                         |                    |                        |                        | 3.5E+04                | 0.7                    |                        |             |
| 407 Gibberellic acid                                                                       | [M+Cl]- | C19H22O6    | 381.11053                         |                    |                        |                        |                        |                        | 3.3E+04                | 1.3         |
| 408 5-(Heptadec-12-enyl)resorcinol                                                         | [M+Cl]- | C23H38O2    | 381.25658                         | 9.8E+04            | 1.6                    |                        |                        |                        |                        |             |
| 409 Trihydroxy-7,3',4'-trimethoxyisoflavan                                                 | [M+Cl]- | C18H20O7    | 383.08988                         |                    |                        |                        | 1.5E+04                | 1.1                    |                        |             |
| 410 24-hydroxy-tetracosanoic acid                                                          | [M-H]-  | C24H48O3    | 383.35307                         |                    | 4.9E+04                | 0.3                    |                        |                        |                        |             |
| 411 S-(Formylmethyl)glutathione                                                            | [M+Cl]- | C12H19N3O7S | 384.06340                         |                    |                        |                        | 2.4E+04                | 1.0                    |                        |             |
| 412 O-Feruloylgalactarate                                                                  | [M-H]-  | C16H18O11   | 385.07727                         |                    |                        |                        |                        |                        | 2.0E+04                | 0.9         |
| 413 5,3',4',5'-Tetramethoxy-6,7-methylenedioxyflavone                                      | [M-H]-  | C20H18O8    | 385.09289                         |                    | 3.1E+04                | -2.1                   |                        |                        |                        |             |
| 414 Mercaptoacetyl-Phe-Leu                                                                 | [M+Cl]- | C17H24N2O4S | 387.11573                         |                    |                        |                        |                        |                        | 5.1E+04                | -1.7        |
| 415 Palmatine                                                                              | [M+Cl]- | C21H22NO4   | 387.12471                         |                    |                        |                        | 3.9E+04                | -1.1                   |                        |             |
| 416 5-Hydroxy-6-methoxy-3',4'-methylenedioxyfurano[2'',3''':7,8]flavanone                  | [M+Cl]- | C19H14O7    | 389.04335                         |                    | 6.0E+04                | -2.4                   |                        |                        |                        |             |
| 417 Latifoline                                                                             | [M-H]-  | C20H27NO7   | 392.17086                         |                    |                        |                        |                        |                        | 2.7E+04                | 1.6         |
| 418 2,2-Dimethyl-3-(4-methoxyphenyl)-4-ethyl-6-(1-pyrrolidinylmethyl)-2H-1-benzopyran-7-ol | [M-H]-  | C25H31NO3   | 392.22312                         |                    | 5.4E+04                | 0.2                    |                        |                        |                        |             |
| 419 PA(15:0/0:0)                                                                           | [M-H]-  | C18H37O7P   | 395.22057                         |                    |                        |                        | 6.6E+04                | -0.4                   |                        |             |
| 420 N-Arachidonoyl glycine                                                                 | [M+Cl]- | C22H35NO3   | 396.23016                         |                    |                        |                        | 2.6E+04                | 2.4                    |                        |             |
| 421 Hexadecenoylcarnitine                                                                  | [M-H]-  | C23H43NO4   | 396.31193                         | 2.6E+04            | 1.5                    |                        |                        |                        |                        |             |
| 422 Gibberellin A19                                                                        | [M+Cl]- | C20H26O6    | 397.14172                         |                    |                        |                        |                        |                        | 2.1E+04                | 1.6         |
| 423 Erythronolide B                                                                        | [M-H]-  | C21H38O7    | 401.25403                         |                    |                        |                        |                        |                        | 2.1E+04                | 1.1         |
| 424 Glucoiberverin                                                                         | [M-H]-  | C11H21NO9S3 | 406.02982                         |                    |                        |                        |                        |                        |                        | 2.3E+04 1.8 |
| 425 Ginkgolide A                                                                           | [M-H]-  | C20H24O9    | 407.13396                         |                    |                        |                        |                        |                        | 1.9E+04                | 2.0         |
| 426 Cholic acid                                                                            | [M-H]-  | C24H40O5    | 407.27960                         |                    |                        |                        |                        |                        | 3.0E+04                | 1.7         |

| #   | Putative Annotation <sup>a</sup>                                  | Ion     | Formula     | m/z <sub>Theo.</sub> <sup>b</sup> | R2020 <sup>c</sup> | ppm W2020 <sup>c</sup> | ppm B2020 <sup>c</sup> | ppm R2021 <sup>c</sup> | ppm W2021 <sup>c</sup> | ppm B2021 <sup>c</sup> | ppm  |
|-----|-------------------------------------------------------------------|---------|-------------|-----------------------------------|--------------------|------------------------|------------------------|------------------------|------------------------|------------------------|------|
| 427 | 4Z,7Z,10Z,13Z,16Z,19Z,22Z,25Z-octacosaoctaenoic acid              | [M-H]-  | C28H40O2    | 407.29555                         |                    | 1.6E+05                | -2.4                   |                        |                        |                        |      |
| 428 | N-oleoyl glutamine                                                | [M-H]-  | C23H42N2O4  | 409.30718                         | 4.8E+04            | 0.6                    |                        |                        |                        |                        |      |
| 429 | Ovaliflavanone A                                                  | [M+Cl]- | C25H28O3    | 411.17391                         |                    |                        |                        |                        |                        | 1.3E+05                | -1.6 |
| 430 | Trimethyl-5Z,9Z,19Z-docosatrenoic acid                            | [M+Cl]- | C25H44O2    | 411.30383                         |                    |                        | 4.3E+04                | -0.7                   |                        |                        |      |
| 431 | Cryptopleurine                                                    | [M+Cl]- | C24H27NO3   | 412.16779                         |                    |                        |                        |                        | 7.8E+04                | 1.7                    |      |
| 432 | 22:2(5Z,9Z)(13Me,17Me,21Me)                                       | [M+Cl]- | C25H46O2    | 413.31918                         |                    | 3.8E+04                | 2.8                    |                        |                        |                        |      |
| 433 | 4-Deoxy-beta-D-gluc-4-enuronosyl-(1,3)-N-acetyl-D-galactosamine   | [M+Cl]- | C14H21NO11  | 414.08086                         | 7.0E+04            | -1.6                   |                        |                        |                        |                        |      |
| 434 | Briantheine W                                                     | [M-H]-  | C24H32O6    | 415.21178                         |                    |                        | 2.5E+04                | 2.0                    |                        |                        |      |
| 435 | Dihydroxycholecalciferol                                          | [M-H]-  | C27H44O3    | 415.32177                         |                    | 5.2E+04                | -2.1                   |                        |                        |                        |      |
| 436 | beta-Tocopherol                                                   | [M-H]-  | C28H48O2    | 415.35786                         |                    |                        |                        |                        |                        | 1.9E+04                | 0.7  |
| 437 | Syringaresinol                                                    | [M-H]-  | C22H26O8    | 417.15579                         |                    |                        | 2.3E+04                | -0.7                   |                        |                        |      |
| 438 | N-stearoyl valine                                                 | [M+Cl]- | C23H45NO3   | 418.30941                         |                    |                        | 2.5E+04                | -0.2                   |                        |                        |      |
| 439 | Lamioside                                                         | [M-H]-  | C18H28O11   | 419.15580                         |                    |                        |                        |                        | 2.6E+04                | 0.2                    |      |
| 440 | N-stearoyl histidine                                              | [M-H]-  | C24H43N3O3  | 420.32317                         |                    |                        |                        |                        | 1.8E+04                | 0.0                    |      |
| 441 | 8-Cinnamoyl-3,4-dihydro-5,7-dihydroxy-4-phenylcoumarin            | [M+Cl]- | C24H18O5    | 421.08506                         |                    |                        | 2.2E+04                | -0.6                   |                        |                        |      |
| 442 | Militarinone C                                                    | [M-H]-  | C26H33NO4   | 422.23299                         |                    |                        |                        |                        | 5.5E+04                | 1.6                    |      |
| 443 | Quassin                                                           | [M+Cl]- | C22H28O6    | 423.15799                         |                    | 3.8E+04                | 1.3                    |                        |                        |                        |      |
| 444 | Chitobiose                                                        | [M-H]-  | C16H28N2O11 | 423.16203                         |                    | 3.8E+04                | -1.0                   |                        |                        |                        |      |
| 445 | Didrovaltratum                                                    | [M-H]-  | C22H32O8    | 423.20244                         | 6.7E+04            | -0.6                   |                        |                        |                        |                        |      |
| 446 | 1alpha,25-dihydroxy-26,27-dinorvitamin D3                         | [M+Cl]- | C25H40O3    | 423.26685                         |                    |                        |                        |                        |                        | 2.4E+04                | 0.7  |
| 447 | Montanic acid                                                     | [M-H]-  | C28H56O2    | 423.42075                         | 4.3E+04            | -1.9                   |                        |                        |                        |                        |      |
| 448 | Jervine                                                           | [M-H]-  | C27H39NO3   | 424.28496                         |                    |                        |                        | 3.0E+04                | 1.8                    |                        |      |
| 449 | Bispyribac acid                                                   | [M-H]-  | C19H18N4O8  | 429.10432                         |                    |                        |                        |                        |                        | 2.5E+04                | 2.0  |
| 450 | PA(P-16:0/O:0)                                                    | [M+Cl]- | C19H39O6P   | 429.21783                         |                    | 5.3E+04                | -1.3                   |                        |                        |                        |      |
| 451 | Stanolone benzoate                                                | [M+Cl]- | C26H34O3    | 429.22020                         |                    | 5.3E+04                | 0.3                    |                        |                        |                        |      |
| 452 | Heptacosanol                                                      | [M+Cl]- | C27H56O     | 431.40174                         |                    |                        |                        | 2.1E+04                | 1.8                    |                        |      |
| 453 | Echimidine                                                        | [M+Cl]- | C20H31NO7   | 432.17893                         |                    |                        |                        | 1.6E+04                | 1.2                    |                        |      |
| 454 | PC(O-12:0/O-1:0)                                                  | [M-H]-  | C21H46NO6P  | 438.29833                         |                    |                        |                        | 2.8E+04                | 1.5                    |                        |      |
| 455 | Bleekerine                                                        | [M+Cl]- | C23H24N2O5  | 443.13780                         |                    |                        |                        | 2.1E+04                | 0.3                    |                        |      |
| 456 | (22E)-1alpha-hydroxy-24-oxo-26,27-cyclo-22,23-didehydrovitamin D3 | [M+Cl]- | C27H38O3    | 445.25150                         |                    | 5.0E+04                | -1.9                   |                        |                        |                        |      |
| 457 | Calophyllolide                                                    | [M+Cl]- | C26H24O5    | 451.13172                         |                    |                        | 2.5E+04                | 0.1                    |                        |                        |      |
| 458 | Calcitriol                                                        | [M+Cl]- | C27H44O3    | 451.29889                         |                    |                        |                        |                        |                        | 1.7E+04                | -1.0 |
| 459 | 8-Caffeoyl-3,4-dihydro-5,7-dihydroxy-4-phenylcoumarin             | [M+Cl]- | C24H18O7    | 453.07465                         |                    | 4.8E+04                | -2.7                   |                        |                        |                        |      |
| 460 | Lactose 6-phosphate                                               | [M+Cl]- | C12H23O14P  | 457.05194                         |                    | 1.2E+05                | -1.8                   |                        |                        |                        |      |
| 461 | Eruberin A                                                        | [M-H]-  | C25H30O8    | 457.18679                         | 1.8E+04            | -0.9                   |                        |                        |                        |                        |      |

| # Putative Annotation <sup>a</sup>                                                                | Ion     | Formula       | m/z <sub>Theo.</sub> <sup>b</sup> | R2020 <sup>c</sup> | ppm W2020 <sup>c</sup> | ppm B2020 <sup>c</sup> | ppm R2021 <sup>c</sup> | ppm W2021 <sup>c</sup> | ppm B2021 <sup>c</sup> | ppm  |
|---------------------------------------------------------------------------------------------------|---------|---------------|-----------------------------------|--------------------|------------------------|------------------------|------------------------|------------------------|------------------------|------|
| 462 CDP-N-methylethanolamine                                                                      | [M-H]-  | C12H22N4O11P2 | 459.06802                         |                    |                        |                        |                        |                        | 2.9E+04                | 1.6  |
| 463 Rutarin                                                                                       | [M+Cl]- | C20H24O10     | 459.10544                         |                    |                        | 2.4E+04                | 2.0                    |                        |                        |      |
| 464 PA(20:3(8Z,11Z,14Z)/0:0)                                                                      | [M-H]-  | C23H41O7P     | 459.25171                         |                    | 4.8E+04                | 1.2                    |                        |                        |                        |      |
| 3,7-Dihydroxy-2-[3-(4-hydroxy-3-methylbutyl)-4-methoxyphenyl]-5,6-dimethoxy-4H-1-benzopyran-4-one | [M+Cl]- | C23H26O8      | 465.13232                         |                    |                        |                        | 2.3E+04                | -0.3                   |                        |      |
| 466 PC(0:0/14:0)                                                                                  | [M-H]-  | C22H46NO7P    | 466.29391                         |                    | 4.8E+04                | -1.6                   |                        |                        |                        |      |
| 467 Lupinisoflavone N                                                                             | [M-H]-  | C25H28O9      | 471.16621                         |                    |                        |                        | 1.9E+04                | -0.3                   |                        |      |
| 468 Parsonsine                                                                                    | [M+Cl]- | C23H37NO7     | 474.22706                         |                    |                        |                        |                        | 2.4E+04                | -1.4                   |      |
| 469 (-)-Asbestinine 2                                                                             | [M-H]-  | C28H44O6      | 475.30651                         |                    | 5.2E+04                | 0.0                    |                        |                        |                        |      |
| 470 Bidenoside B                                                                                  | [M-H]-  | C24H30O10     | 477.17567                         |                    |                        |                        |                        | 6.2E+04                | 2.0                    |      |
| 471 PG(13:0/0:0)                                                                                  | [M+Cl]- | C19H39O9P     | 477.20257                         | 3.5E+04            | -0.1                   |                        |                        |                        |                        |      |
| 472 Guanosine diphosphate                                                                         | [M+Cl]- | C10H15N5O11P2 | 477.99279                         |                    |                        | 4.2E+04                | 2.0                    |                        |                        |      |
| 473 Delcorine                                                                                     | [M-H]-  | C26H41NO7     | 478.28103                         |                    | 7.2E+04                | 1.0                    |                        |                        |                        |      |
| 474 sn-3-O-(Geranylgeranyl)glycerol 1-phosphate                                                   | [M+Cl]- | C23H41O6P     | 479.23329                         |                    |                        |                        |                        | 1.9E+04                | 0.4                    |      |
| 475 Ceramide (d18:1/12:0)                                                                         | [M-H]-  | C30H59NO3     | 480.44261                         |                    |                        | 3.9E+04                | -0.8                   | 1.9E+04                | -1.4                   |      |
| 476 Coenzyme M 7-mercaptoheptanoylthreonine-phosphate heterodisulfide                             | [M-H]-  | C13H26NO10PS3 | 482.03910                         |                    |                        | 6.3E+04                | -1.5                   |                        |                        |      |
| 477 17beta-Estradiol 17-(beta-D-glucuronide)                                                      | [M+Cl]- | C24H31O8      | 482.17129                         |                    | 9.9E+04                | 1.3                    |                        |                        |                        |      |
| 478 PA(20:4(5Z,8Z,11Z,14Z)e/2:0)                                                                  | [M-H]-  | C25H43O7P     | 485.26829                         |                    |                        |                        | 1.5E+06                | -1.9                   | 7.2E+05                | 0.0  |
| 479 Acacetin 7-(2''-acetylglucoside)                                                              | [M-H]-  | C24H24O11     | 487.12459                         |                    | 1.2E+05                | -1.5                   |                        |                        |                        |      |
| 480 Fucosyllactose                                                                                | [M-H]-  | C18H32O15     | 487.16744                         |                    |                        |                        |                        | 2.9E+04                | -1.2                   |      |
| 481 1-(5'-Phosphoribosyl)-5-amino-4-(N-succinocarboxamide)-imidazole                              | [M+Cl]- | C13H19N4O12P  | 489.04284                         |                    |                        |                        | 3.3E+04                | 0.6                    |                        |      |
| 482 Deoxylimonic acid D-ring-lactone                                                              | [M-H]-  | C26H34O9      | 489.21309                         |                    |                        | 4.1E+04                | -0.2                   |                        |                        |      |
| 483 PC(O-16:0/O-1:0)                                                                              | [M-H]-  | C25H54NO6P    | 494.36082                         |                    |                        |                        | 2.4E+04                | 1.6                    |                        |      |
| 484 LysoPE(0:0/20:5(5Z,8Z,11Z,14Z,17Z))                                                           | [M-H]-  | C25H42NO7P    | 498.26356                         |                    |                        |                        |                        |                        | 2.5E+04                | -1.9 |
| 485 Pumilaisoflavone B                                                                            | [M+Cl]- | C27H28O7      | 499.15227                         |                    |                        |                        |                        | 2.0E+04                | 1.3                    |      |
| 486 6-Hydroxykaempferol 3,5,7,4'-tetramethyl ether 6-rhamnoside                                   | [M-H]-  | C25H28O11     | 503.15589                         | 2.6E+04            | 0.7                    |                        |                        |                        |                        |      |
| 487 N-oleoyl tryptophan                                                                           | [M+Cl]- | C29H44N2O3    | 503.30375                         |                    |                        |                        |                        | 1.6E+04                | 1.7                    |      |
| 488 N3'-Acetylto bramycin                                                                         | [M-H]-  | C20H39N5O10   | 508.26154                         |                    |                        | 3.3E+04                | 1.7                    |                        |                        |      |
| 489 PC(14:0/2:0)                                                                                  | [M-H]-  | C24H48NO8P    | 508.30435                         |                    |                        |                        |                        |                        | 1.8E+04                | 0.3  |
| 490 Cer(d18:1/14:0)                                                                               | [M-H]-  | C32H63NO3     | 508.47412                         |                    |                        |                        | 1.7E+04                | -1.2                   |                        |      |
| 491 Flemiphyllin                                                                                  | [M+Cl]- | C30H34O5      | 509.21003                         | 2.4E+04            | 0.3                    |                        |                        |                        |                        |      |
| 492 6'',6''-Dimethylpyraono[2'',3'':7,8]kaempferol 4'-methyl ether 3-rhamnoside                   | [M-H]-  | C27H28O10     | 511.16035                         |                    |                        |                        |                        |                        | 1.9E+04                | 1.2  |
| 493 Raucaffricine                                                                                 | [M-H]-  | C27H32N2O8    | 511.20814                         |                    |                        |                        | 2.2E+04                | 0.9                    |                        |      |
| 494 Luteolin 7-(2''-glucosyllactate)                                                              | [M-H]-  | C24H24O13     | 519.11396                         |                    |                        | 3.9E+04                | 0.9                    |                        |                        |      |
| 495 Cer(d18:0/15:0)                                                                               | [M-H]-  | C33H67NO3     | 524.50427                         |                    |                        | 4.0E+04                | 1.0                    |                        |                        |      |

| # Putative Annotation <sup>a</sup>                                  | Ion     | Formula       | m/z <sub>Theo.</sub> <sup>b</sup> | R2020 <sup>c</sup> | ppm W2020 <sup>c</sup> | ppm B2020 <sup>c</sup> | ppm R2021 <sup>c</sup> | ppm W2021 <sup>c</sup> | ppm B2021 <sup>c</sup> | ppm  |
|---------------------------------------------------------------------|---------|---------------|-----------------------------------|--------------------|------------------------|------------------------|------------------------|------------------------|------------------------|------|
| 496 Kaempferol 3,7,4'-tri-O-sulfate                                 | [M-H]-  | C15H10O15S3   | 524.91091                         | 2.6E+04            | -0.9                   |                        |                        |                        |                        |      |
| 497 Quercetin 3-rhamnoside-3'-sulfate                               | [M-H]-  | C21H20O14S    | 527.05010                         |                    |                        | 3.0E+05                | 1.4                    |                        |                        |      |
| 498 dTDP-L-olivose                                                  | [M-H]-  | C16H26N2O14P2 | 531.07865                         | 2.1E+04            | -0.2                   |                        |                        |                        |                        |      |
| 499 13-Deoxycarminomycin                                            | [M+Cl]- | C26H29NO9     | 534.15328                         |                    |                        |                        |                        |                        | 2.0E+04                | 0.7  |
| 500 Lappaol A                                                       | [M-H]-  | C30H32O9      | 535.19736                         | 6.1E+04            | -0.2                   |                        |                        |                        |                        |      |
| 501 Phytofluene                                                     | [M-H]-  | C40H62        | 541.47784                         |                    |                        |                        | 2.3E+04                | 0.1                    |                        |      |
| 502 2,5-Diaminopyrimidine nucleoside triphosphate                   | [M+Cl]- | C9H18N5O14P3  | 547.97622                         |                    |                        | 3.9E+04                | -0.9                   |                        |                        |      |
| 503 Phoslactomycin B                                                | [M+Cl]- | C25H40NO8P    | 548.21866                         |                    |                        |                        |                        | 2.1E+04                | -0.2                   |      |
| 504 Quercetin 3-sulfate-7-alpha-arabinopyranoside                   | [M+Cl]- | C20H18O14S    | 549.01038                         |                    |                        |                        |                        |                        | 2.1E+04                | 1.4  |
| 505 all-trans-retinyl stearate                                      | [M-H]-  | C38H64O2      | 551.48335                         |                    | 3.7E+05                | 0.3                    |                        |                        |                        |      |
| 506 Pantethine                                                      | [M-H]-  | C22H42N4O8S2  | 553.23713                         | 2.4E+04            | -1.8                   |                        |                        |                        |                        |      |
| 507 PI(P-16:0/0:0)                                                  | [M-H]-  | C25H49O11P    | 555.29397                         |                    | 2.8E+06                | 0.9                    |                        |                        |                        |      |
| 508 Cucurbitacin E                                                  | [M-H]-  | C32H44O8      | 555.29634                         |                    | 2.8E+06                | 1.6                    |                        |                        |                        |      |
| 509 Cucurbitacin P                                                  | [M+Cl]- | C30H48O7      | 555.31034                         |                    |                        |                        | 2.7E+04                | -1.7                   |                        |      |
| 510 Linoleoylglycerophosphocholine                                  | [M+Cl]- | C26H51NO7P    | 555.31034                         |                    |                        |                        | 2.7E+04                | -1.1                   |                        |      |
| 511 5,7,2',3',4'-Pentahydroxy-3,6-dimethoxyflavone 7-glucoside      | [M+Cl]- | C23H24O14     | 559.08601                         | 2.9E+04            | -0.5                   |                        |                        |                        |                        |      |
| 512 PG(P-20:0/0:0)                                                  | [M+Cl]- | C26H53O8P     | 559.31735                         |                    |                        |                        |                        | 2.4E+04                | -0.3                   |      |
| 513 3-Hydroxy-L-tyrosyl-AMP                                         | [M+Cl]- | C19H23N6O10P  | 561.09073                         |                    | 1.9E+05                | 1.7                    |                        |                        |                        |      |
| 514 Musaroside                                                      | [M-H]-  | C30H44O10     | 563.28617                         |                    | 1.2E+05                | -0.5                   |                        |                        |                        |      |
| 515 N-[(3a,5b,7b)-7-hydroxy-24-oxo-3-(sulfoxy)cholan-24-yl]-Glycine | [M+Cl]- | C26H43NO8S    | 564.24034                         | 2.4E+04            | -1.4                   |                        |                        |                        |                        |      |
| 516 Ginkgetin                                                       | [M-H]-  | C32H22O10     | 565.11402                         |                    | 9.2E+04                | 1.0                    |                        |                        |                        |      |
| 517 dTDP-L-olivose                                                  | [M+Cl]- | C16H26N2O14P2 | 567.05533                         | 4.7E+04            | -1.3                   |                        |                        |                        |                        |      |
| 518 Apigenin 7-methyl ether 5-(6''-malonylglucoside)                | [M+Cl]- | C25H24O13     | 567.09088                         |                    |                        |                        |                        | 3.4E+04                | 0.4                    |      |
| 519 Corotoxigenin-3-o-alpha-L-rhamnopyranoside                      | [M+Cl]- | C29H42O9      | 569.25228                         | 3.3E+04            | -0.3                   |                        |                        |                        |                        |      |
| 520 PS(22:4(7Z,10Z,13Z,16Z)/0:0)                                    | [M-H]-  | C28H48NO9P    | 572.29924                         |                    |                        |                        |                        |                        | 3.4E+04                | 0.3  |
| 521 Cer(d18:1/19:0)                                                 | [M-H]-  | C37H73NO3     | 578.55105                         |                    |                        |                        |                        |                        | 4.9E+04                | 1.2  |
| 522 Vitamin K2                                                      | [M-H]-  | C41H56O2      | 579.41991                         |                    |                        |                        |                        |                        | 2.8E+04                | 1.5  |
| 523 Dihydrozeatin-9-N-glucoside-O-glucoside                         | [M+Cl]- | C22H35N5O11   | 580.20307                         |                    |                        |                        | 1.9E+04                | -0.6                   |                        |      |
| 524 Cer(t18:0/16:0)                                                 | [M+Cl]- | C34H69NO4     | 590.49206                         |                    | 1.3E+05                | 1.0                    |                        |                        |                        |      |
| 525 Ceramide (d18:1/20:0)                                           | [M-H]-  | C38H75NO3     | 592.56705                         |                    |                        |                        | 2.0E+04                | 0.6                    | 3.1E+04                | 1.5  |
| 526 Dalpanol O-glucoside                                            | [M+Cl]- | C29H34O12     | 609.17443                         | 2.5E+04            | 0.3                    |                        |                        |                        |                        |      |
| 527 DG(15:0/18:4(6Z,9Z,12Z,15Z)/0:0)                                | [M+Cl]- | C36H62O5      | 609.42987                         |                    |                        |                        |                        |                        | 2.8E+04                | -1.2 |
| 528 Myricetin 3-sambubioside                                        | [M-H]-  | C26H28O17     | 611.12457                         |                    |                        | 3.0E+04                | 1.3                    |                        |                        |      |
| 529 Naringenin 7-(2-p-Coumaroylglucoside)                           | [M+Cl]- | C30H28O12     | 615.12748                         |                    | 8.4E+04                | 2.8                    |                        |                        |                        |      |
| 530 Apigenin 5-rhamnosyl-(1->2)-(6''-acetylglucoside)               | [M-H]-  | C29H32O15     | 619.16661                         |                    |                        |                        |                        |                        | 2.8E+04                | 0.4  |
| 531 Cer(d18:0/22:0)                                                 | [M-H]-  | C40H81NO3     | 622.61437                         |                    | 5.2E+04                | -2.0                   |                        |                        |                        |      |
| 532 Glycochenodeoxycholic acid 3-glucuronide                        | [M-H]-  | C32H51NO11    | 624.33942                         |                    |                        | 7.9E+04                | -0.8                   |                        |                        |      |
| 533 Ubiquinone-6                                                    | [M+Cl]- | C39H58O4      | 625.40219                         |                    |                        |                        |                        |                        | 3.2E+04                | 1.2  |

| # Putative Annotation <sup>a</sup>                                                                 | Ion     | Formula       | m/z <sub>Theo.</sub> <sup>b</sup> | R2020 <sup>c</sup> | ppm W2020 <sup>c</sup> | ppm B2020 <sup>c</sup> | ppm R2021 <sup>c</sup> | ppm W2021 <sup>c</sup> | ppm B2021 <sup>c</sup> | ppm  |
|----------------------------------------------------------------------------------------------------|---------|---------------|-----------------------------------|--------------------|------------------------|------------------------|------------------------|------------------------|------------------------|------|
| 534 Quercetin 3-(4''-acetylramnoside)-7-rhamnoside                                                 | [M-H]-  | C29H32O16     | 635.16251                         |                    |                        | 3.9E+04                | -1.2                   |                        |                        |      |
| 535 Cer(t18:0/24:0)                                                                                | [M-H]-  | C42H85NO4     | 666.64024                         |                    |                        |                        | 2.1E+04                | 0.5                    |                        |      |
| 536 Acacetin 7-(4'''-acetylrutinoside)                                                             | [M+Cl]- | C30H34O15     | 669.15973                         |                    |                        | 2.8E+04                | -0.8                   |                        |                        |      |
| 537 PE(14:1(9Z)/P-18:1(11Z))                                                                       | [M-H]-  | C37H70NO7P    | 670.48163                         |                    |                        |                        | 3.2E+04                | 0.1                    |                        |      |
| 538 Purpureacin-1                                                                                  | [M+Cl]- | C37H66O8      | 673.44517                         | 4.1E+04            | 0.7                    |                        |                        |                        |                        |      |
| 539 Gnididin                                                                                       | [M+Cl]- | C37H44O10     | 683.26330                         |                    |                        |                        |                        | 1.9E+04                | -0.7                   |      |
| 540 DG(20:5(5Z,8Z,11Z,14Z,17Z)/22:6(4Z,7Z,10Z,13Z,16Z,19Z)/0:0)                                    | [M-H]-  | C45H66O5      | 685.48341                         |                    |                        | 3.9E+04                | 0.5                    |                        |                        |      |
| 541 PG(14:0/16:0)                                                                                  | [M-H]-  | C36H71O10P    | 693.47087                         |                    |                        |                        |                        | 3.4E+05                | 0.5                    |      |
| 542 Tauroolithocholic acid 3-glucuronide                                                           | [M+Cl]- | C32H53NO11S   | 694.30269                         |                    |                        |                        |                        | 4.4E+04                | 0.9                    |      |
| 543 Ecdysone palmitate                                                                             | [M-H]-  | C43H74O7      | 701.53534                         |                    |                        |                        | 2.4E+04                | 1.2                    |                        |      |
| 544 CE(19:0)                                                                                       | [M+Cl]- | C46H82O2      | 701.60088                         |                    | 4.1E+04                | 1.1                    |                        |                        |                        |      |
| 545 PA(16:1(9Z)/22:4(7Z,10Z,13Z,16Z))                                                              | [M-H]-  | C41H71O8P     | 721.48213                         |                    |                        |                        |                        | 3.0E+04                | -1.0                   |      |
| 546 Kaempferol 3-rhamnosyl-(1->4)-rhamnoside-7-rhamnoside                                          | [M-H]-  | C33H40O18     | 723.21460                         |                    |                        | 3.6E+04                | -0.6                   |                        |                        |      |
| 547 Naringenin 7-O-(2'',6''-di-O-alpha-rhamnopyranosyl)-beta-glucopyranoside                       | [M-H]-  | C33H42O18     | 725.22936                         |                    |                        |                        | 3.5E+04                | 0.7                    |                        |      |
| 548 PG(12:0/18:2(9Z,12Z))                                                                          | [M+Cl]- | C36H67O10P    | 725.41754                         |                    |                        | 5.6E+04                | -1.3                   |                        |                        |      |
| 549 Ubiquinone-8                                                                                   | [M-H]-  | C49H74O4      | 725.55191                         |                    |                        |                        |                        | 3.6E+04                | -0.7                   |      |
| 550 DG(19:0/22:2(13Z,16Z)/0:0)[iso2]                                                               | [M+Cl]- | C44H82O5      | 725.58563                         |                    | 1.0E+05                | -1.9                   |                        |                        |                        |      |
| 551 Scillarenin 3-O-glucosylrhamnoside                                                             | [M+Cl]- | C36H52O13     | 727.31118                         |                    |                        | 1.6E+05                | -1.4                   |                        |                        |      |
| 552 PG(13:0/20:4(5Z,8Z,11Z,14Z))                                                                   | [M-H]-  | C39H69O10P    | 727.45651                         |                    |                        |                        | 1.6E+05                | -1.3                   |                        |      |
| 553 PA(17:0/21:0)                                                                                  | [M-H]-  | C41H81O8P     | 731.55963                         | 5.7E+04            | -0.3                   |                        |                        |                        |                        |      |
| 554 PC(16:0/16:0)                                                                                  | [M-H]-  | C40H80NO8P    | 732.55538                         |                    |                        |                        |                        | 2.3E+04                | -0.7                   |      |
| 555 PE(O-16:1(1Z)/22:6(4Z,7Z,10Z,13Z,16Z,19Z))                                                     | [M-H]-  | C43H74NO7P    | 746.51325                         |                    |                        |                        |                        |                        | 4.9E+04                | -0.3 |
| 556 19'-Hexanoyloxyisomytiloxanthin                                                                | [M+Cl]- | C46H64O6      | 747.43969                         |                    | 4.2E+04                | 0.5                    |                        |                        |                        |      |
| 557 UDP-N-acetylmuramoyl-L-alanine                                                                 | [M-H]-  | C23H36N4O20P2 | 749.13254                         | 7.2E+04            | -0.8                   |                        |                        |                        |                        |      |
| 558 Luteolin 7-glucuronide-3',4'-dirhamnoside                                                      | [M-H]-  | C33H38O20     | 753.18916                         |                    |                        | 5.2E+04                | -1.1                   |                        |                        |      |
| 559 SM(d18:0/20:2(11Z,14Z))                                                                        | [M-H]-  | C43H83N2O6P   | 753.59160                         |                    | 3.4E+04                | 1.4                    |                        |                        |                        |      |
| 560 PA(16:0/22:1(11Z))                                                                             | [M+Cl]- | C41H79O8P     | 765.52066                         | 7.0E+04            | 0.1                    |                        |                        |                        |                        |      |
| 561 PC(O-16:0/O-18:1(9Z))                                                                          | [M+Cl]- | C42H86NO6P    | 766.58966                         |                    |                        |                        |                        |                        | 3.0E+04                | -1.3 |
| 562 PC(15:0/20:3(5Z,8Z,11Z))                                                                       | [M-H]-  | C43H80NO8P    | 768.55557                         |                    |                        |                        |                        |                        | 3.0E+04                | -0.9 |
| 563 PA(20:3(8Z,11Z,14Z)/22:6(4Z,7Z,10Z,13Z,16Z,19Z))                                               | [M-H]-  | C45H71O8P     | 769.48176                         |                    |                        |                        |                        |                        | 3.1E+04                | -0.5 |
| 564 1-(6-[3]-ladderane-hexanoyl)-2-(8-[3]-ladderane-octanyl)-sn-glycero-3-phospho-(1'-sn-glycerol) | [M-H]-  | C44H73O9P     | 775.49259                         |                    |                        |                        |                        |                        | 2.6E+04                | -0.8 |
| 565 Patellamide A                                                                                  | [M+Cl]- | C35H50N8O6S2  | 777.29953                         |                    |                        |                        |                        |                        | 1.3E+05                | -0.8 |
| 566 Cyanidin 3,5-di-(6-malonylglucoside)                                                           | [M-H]-  | C33H35O22     | 782.15472                         |                    | 3.0E+04                | -0.6                   |                        |                        |                        |      |
| 567 Pfaffoside A                                                                                   | [M+Cl]- | C40H60O13     | 783.37374                         |                    |                        | 3.0E+04                | -1.2                   |                        |                        |      |
| 568 PI(P-16:0/16:1(9Z))                                                                            | [M-H]-  | C41H77O12P    | 791.50893                         |                    |                        | 3.0E+04                | -1.2                   |                        |                        |      |
| 569 Delphinidin 3-(2-xylosylgalactoside)-5-glucoside                                               | [M+Cl]- | C32H39O21     | 794.16791                         |                    |                        |                        | 2.7E+04                | -0.2                   |                        |      |

| #   | Putative Annotation <sup>a</sup>                                        | Ion     | Formula       | m/z <sub>Theo.</sub> <sup>b</sup> | R2020 <sup>c</sup> | ppm  | W2020 <sup>c</sup> | ppm  | B2020 <sup>c</sup> | ppm | R2021 <sup>c</sup> | ppm  | W2021 <sup>c</sup> | ppm  | B2021 <sup>c</sup> | ppm  |
|-----|-------------------------------------------------------------------------|---------|---------------|-----------------------------------|--------------------|------|--------------------|------|--------------------|-----|--------------------|------|--------------------|------|--------------------|------|
| 570 | PA(20:4(5Z,8Z,11Z,14Z)/22:6(4Z,7Z,10Z,13Z,16Z,19Z))                     | [M+Cl]- | C45H69O8P     | 803.44198                         |                    |      |                    |      |                    |     |                    |      |                    |      | 4.3E+04            | 0.5  |
| 571 | PS(13:0/22:4(7Z,10Z,13Z,16Z))                                           | [M+Cl]- | C41H72NO10P   | 804.45879                         |                    |      | 2.5E+04            | -0.8 |                    |     |                    |      |                    |      |                    |      |
| 572 | PG(O-18:0/21:0)                                                         | [M-H]-  | C45H91O9P     | 805.63279                         |                    |      | 2.4E+04            | 0.5  |                    |     |                    |      |                    |      |                    |      |
| 573 | PG(17:0/22:6(4Z,7Z,10Z,13Z,16Z,19Z))                                    | [M-H]-  | C45H77O10P    | 807.51816                         |                    |      | 2.0E+04            | -2.0 |                    |     |                    |      |                    |      |                    |      |
| 574 | PG(15:0/22:4(7Z,10Z,13Z,16Z))                                           | [M+Cl]- | C43H77O10P    | 819.49529                         |                    |      |                    |      |                    |     |                    |      | 1.9E+04            | -0.6 |                    |      |
| 575 | PG(17:0/22:0)                                                           | [M-H]-  | C45H89O10P    | 819.61206                         |                    |      | 9.2E+04            | -1.5 |                    |     |                    |      |                    |      |                    |      |
| 576 | PG(O-18:0/20:3(8Z,11Z,14Z))                                             | [M+Cl]- | C44H83O9P     | 821.54601                         |                    |      |                    |      |                    |     | 3.3E+04            | 1.1  |                    |      |                    |      |
| 577 | 5-Methyl-5,6,7,8-tetrahydromethanopterin                                | [M+Cl]- | C31H47N6O16P  | 825.24802                         |                    |      | 2.1E+04            | 0.6  |                    |     |                    |      |                    |      |                    |      |
| 578 | PG(18:1(9Z)/22:2(13Z,16Z))                                              | [M-H]-  | C46H85O10P    | 827.58076                         | 3.6E+04            | 0.5  |                    |      |                    |     |                    |      |                    |      |                    |      |
| 579 | PG(16:0/22:1(11Z))                                                      | [M+Cl]- | C44H85O10P    | 839.55744                         |                    |      | 2.9E+04            | 2.4  |                    |     |                    |      |                    |      |                    |      |
| 580 | Bayogenin 3-O-cellobioside                                              | [M+Cl]- | C42H68O15     | 847.42499                         |                    |      |                    |      |                    |     |                    |      |                    |      | 1.7E+04            | 0.3  |
| 581 | PS(O-20:0/22:6(4Z,7Z,10Z,13Z,16Z,19Z))                                  | [M-H]-  | C48H84NO9P    | 848.58109                         |                    |      | 3.3E+04            | -2.1 |                    |     |                    |      |                    |      |                    |      |
| 582 | Palargonidin 3-(6''-ferulylglucoside)-5-(6'''-malonylglucoside)         | [M-H]-  | C40H41O21     | 856.20695                         |                    |      |                    |      |                    |     |                    |      |                    |      | 2.4E+04            | -0.2 |
| 583 | PS(O-18:0/22:4(7Z,10Z,13Z,16Z))                                         | [M+Cl]- | C46H84NO9P    | 860.55854                         |                    |      |                    |      |                    |     | 4.4E+04            | -0.9 |                    |      |                    |      |
| 584 | PC(18:0/22:6(4Z,7Z,10Z,13Z,16Z,19Z))                                    | [M+Cl]- | C48H84NO8P    | 868.56286                         |                    |      | 2.0E+04            | 2.2  |                    |     |                    |      |                    |      |                    |      |
| 585 | PI(O-18:0/20:5(5Z,8Z,11Z,14Z,17Z))                                      | [M-H]-  | C47H83O12P    | 869.55453                         |                    |      |                    |      |                    |     |                    |      |                    |      | 1.8E+04            | 0.5  |
| 586 | PG(19:0/22:4(7Z,10Z,13Z,16Z))                                           | [M+Cl]- | C47H85O10P    | 875.55744                         |                    |      | 2.0E+04            | -2.5 |                    |     |                    |      |                    |      |                    |      |
| 587 | Guanosine tetraphosphate adenosine                                      | [M+Cl]- | C20H28N10O20P | 887.01258                         |                    |      | 2.9E+04            | 2.2  |                    |     |                    |      |                    |      |                    |      |
| 588 | PC(20:2(11Z,14Z))                                                       | [M+Cl]- | C50H84NO8P    | 892.56338                         |                    |      |                    |      |                    |     | 4.8E+04            | -0.6 |                    |      |                    |      |
| 589 | Pelargonidin 3-glucoside-7-(6-(4-(glucosyl)-p-hydroxybenzoyl)glucoside) | [M+Cl]- | C40H45O22     | 912.20966                         |                    |      |                    |      |                    |     |                    |      | 4.8E+04            | 0.0  |                    |      |
| 590 | 4-Isopropenyl-2-oxy-cyclohexanecarboxyl-CoA                             | [M-H]-  | C31H48N7O18P3 | 930.19201                         |                    |      |                    |      |                    |     |                    |      | 2.0E+04            | -0.4 |                    |      |
| 591 | TG(17:2(9Z,12Z)/20:5(5Z,8Z,11Z,14Z,17Z)/20:5(5Z,8Z,11Z,14Z,17Z))        | [M+Cl]- | C60H92O6      | 943.65879                         |                    |      | 3.1E+04            | -2.2 |                    |     |                    |      |                    |      |                    |      |
| 592 | Pentaglutamyl folate                                                    | [M-H]-  | C39H47N11O18  | 956.30308                         |                    |      |                    |      |                    |     | 3.4E+04            | -0.3 |                    |      |                    |      |
| 593 | PI(20:1(11Z)/22:4(7Z,10Z,13Z,16Z))                                      | [M+Cl]- | C51H89O13P    | 975.57287                         |                    |      |                    |      |                    |     | 3.7E+04            | 0.6  |                    |      |                    |      |
| 594 | Isorhamnetin 3-rhamnosyl-(1->2)-gentiobiosyl-(1->6)-glucoside           | [M+Cl]- | C40H52O26     | 983.24408                         | 6.3E+04            | -0.4 |                    |      |                    |     |                    |      |                    |      |                    |      |

<sup>a</sup> CE Cholesteryl ester; Cer Ceramide; DG Diacylglycerol; MG Monoacylglycerol; PA Phosphatidic acid; PC Phosphatidylcholine; PE Phosphatidylethanolamine; PG Glycerophospholipids; PGE1 Prostaglandin E1; PI Phosphatidylinositol; PS Phosphatidylserine; SM Sphingomyelin; TG Triacylglycerol.

<sup>b</sup> Theoretical mass

<sup>c</sup> R stands for red tunica, W stands for white tunica and B stands for bulb.
